# Supplementary material
Source: PubMed Central journal article supplement (PMC3055689)
Supplement: npp2010195x1.pdf [file npp2010195x1.pdf]

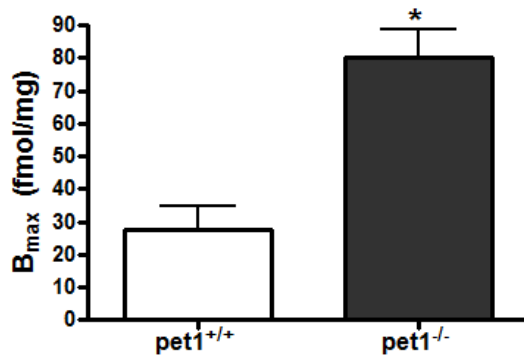

**Supplementary Figure 1.** 5-HT<sub>2C</sub> receptors in hippocampus of *pet1*<sup>-/-</sup> mice are upregulated. B<sub>max</sub> estimates were obtained by saturation binding with membrane preparations and [<sup>3</sup>H]-mesulergine + 100 nM spiperone. Nonspecific binding was determined by incubating the reactions with 10 μM ritanserin, and data are presented as mean B<sub>max</sub> ± SEM (N=6/genotype). \*p<0.05, unpaired T test.

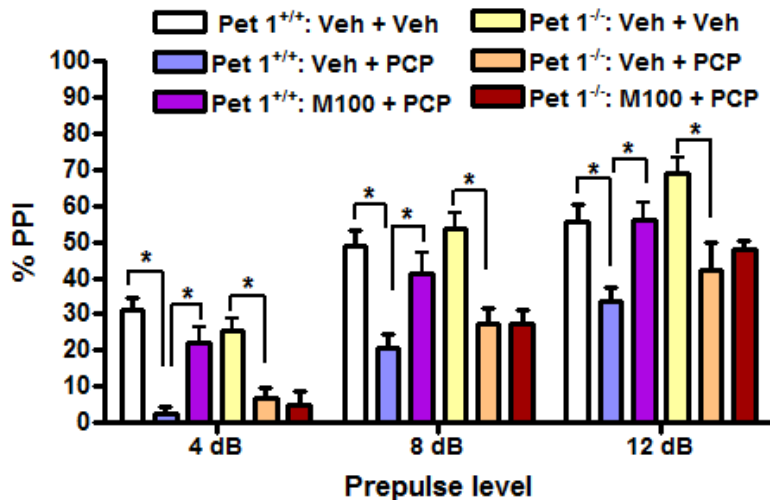

**Supplementary Figure 2.** Normalization of sensory motor gating deficit by 5-HT<sub>2A</sub> selective antagonist M100907 is lost in *pet1*<sup>-/-</sup> mice. Effect of M100907 (M100, 0.5 mg/kg) on PCP (7.0 mg/kg)-induced disruption of pre-pulse inhibition (PPI) was measured. In *pet1*<sup>+/+</sup> mice, M100907 pretreatment completely normalized disruption of PPI by PCP at all prepulse levels, while it had no effect in *pet1*<sup>-/-</sup> mice (N=8/group). ). \*p<0.05, two way ANOVA followed by Bonferroni post tests for multiple comparisons.

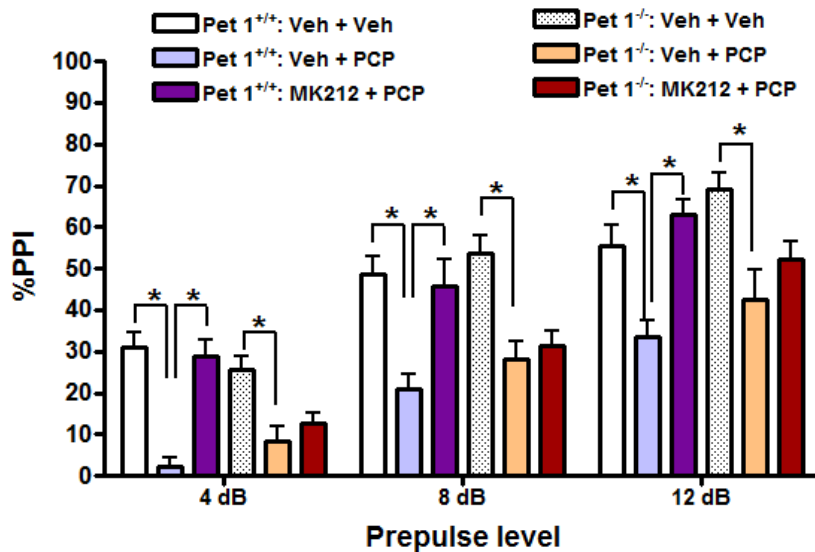

**Supplementary Figure 3.** Normalization of sensory motor gating deficit by 5-HT<sub>2C</sub> selective antagonist MK212 is lost in *pet1*<sup>-/-</sup> mice. Effect of MK212 (1.0 mg/kg) on PCP (7.0 mg/kg)-induced disruption of pre-pulse inhibition (PPI) was measured. In *pet1*<sup>+/+</sup> mice, MK212 pretreatment completely normalized disruption of PPI by PCP at all prepulse levels, while it had no effect in *pet1*<sup>-/-</sup> mice (N=8/group). \*.p<0.05, two way ANOVA followed by Bonferroni post tests for multiple comparisons.
