# Supplementary material
Source: PubMed Central journal article supplement (PMC3055689)
Supplement: npp2010195x3.pdf [file npp2010195x3.pdf]

| Target number | ASSAY ID | CLOZAPINE | HALOPERIDOL | OLANZAPINE | Protein Target     | Class of molecular target |
|---------------|----------|-----------|-------------|------------|--------------------|---------------------------|
| 1             | PDSP     | 5.9788    | 4.9201      | 4.6855     | 5-HT1A - SEROTONIN | GPCR-aminergic            |
| 2             | PDSP     | 5.4001    | 5.7825      | 5.2933     | 5-HT1B - SEROTONIN | GPCR-aminergic            |
| 3             | PDSP     | 4.6712    | 4.1188      | 4.8008     | 5-HT1D - SEROTONIN | GPCR-aminergic            |
| 4             | PDSP     | 5.015     | 4           | 4.6183     | 5-HT1E - SEROTONIN | GPCR-aminergic            |
| 5             | PDSP     | 6.8861    | 6.1367      | 7.5229     | 5-HT2A - SEROTONIN | GPCR-aminergic            |
| 6             | PDSP     | 6.5376    | 4           | 6.6198     | 5-HT2C - SEROTONIN | GPCR-aminergic            |
| 7             | PDSP     | 4.4138    | 4.6484      | 4.9165     | 5-HT5 - SEROTONIN  | GPCR-aminergic            |
| 8             | PDSP     | 6.7696    | 4.4358      | 7.2218     | 5-HT6 - SEROTONIN  | GPCR-aminergic            |
| 9             | PDSP     | 6.7447    | 5.4225      | 5.9788     | 5-HT7 - SEROTONIN  | GPCR-aminergic            |
| 10            | PDSP     | 5.7235    | 6.0809      | 6.2366     | D1-DOPAMINE        | GPCR-aminergic            |
| 11            | PDSP     | 5.3655    | 7.699       | 6.1427     | D2-DOPAMINE        | GPCR-aminergic            |
| 12            | PDSP     | 5.1898    | 6.9208      | 6.2007     | D3-DOPAMINE        | GPCR-aminergic            |
| 13            | PDSP     | 6.4089    | 6.8239      | 6.7212     | D4-DOPAMINE        | GPCR-aminergic            |
| 14            | PDSP     | 5.6289    | 5.8327      | 6.0458     | D5-DOPAMINE        | GPCR-aminergic            |
| 15            | PDSP     | 7.699     | 4.5226      | 7.3098     | H1-HISTAMINE       | GPCR-aminergic            |
| 16            | PDSP     | 5.8153    | 4.9987      | 6.3565     | H2-HISTAMINE       | GPCR-aminergic            |
| 17            | PDSP     | 4.1967    | 4           | 4.4303     | H3-HISTAMINE       | GPCR-aminergic            |
| 18            | PDSP     | 5.0862    | 4           | 4          | H4-HISTAMINE       | GPCR-aminergic            |
| 19            | PDSP     | 7.7959    | 6.9208      | 5.9626     | ALPHA1A-ADRENERGIC | GPCR-aminergic            |
| 20            | PDSP     | 7.1549    | 7.0969      | 5.58       | ALPHA1B-ADRENERGIC | GPCR-aminergic            |
| 21            | PDSP     | 5.8477    | 4.9469      | 5.5031     | ALPHA2A-ADRENERGIC | GPCR-aminergic            |
| 22            | PDSP     | 6.5686    | 5.3188      | 6.0862     | ALPHA2B-ADRENERGIC | GPCR-aminergic            |
| 23            | PDSP     | 6.4685    | 5.2596      | 6.5376     | ALPHA2C-ADRENERGIC | GPCR-aminergic            |
| 24            | PDSP     | 4         | 4           | 4          | beta1-ADRENERGIC   | GPCR-aminergic            |
| 25            | PDSP     | 4         | 4           | 4          | beta2-ADRENERGIC   | GPCR-aminergic            |
| 26            | PDSP     | 6.8539    | 4           | 6.6198     | M1-MUSCARINIC      | GPCR-aminergic            |
| 27            | PDSP     | 6.8539    | 4           | 6.1024     | M2-MUSCARINIC      | GPCR-aminergic            |
| 28            | PDSP     | 6.6021    | 4           | 6.2924     | M3-MUSCARINIC      | GPCR-aminergic            |
| 29            | PDSP     | 6.5376    | 4           | 5.0009     | M4-MUSCARINIC      | GPCR-aminergic            |
| 30            | PDSP     | 6.0269    | 5.1824      | 7.0458     | M5-MUSCARINIC      | GPCR-aminergic            |

|    |      |   |   |   |                                                                                                                     |              |
|----|------|---|---|---|---------------------------------------------------------------------------------------------------------------------|--------------|
| 31 | 440  | 4 | 4 | 4 | <a href="#">formyl peptide receptor 1 [Homo sapiens][gi:4503779]</a>                                                | GPCR-peptide |
| 32 | 441  | 4 | 4 | 4 | <a href="#">formyl peptide receptor-like 1 [Homo sapiens][gi:54112388]</a>                                          | GPCR-peptide |
| 33 | 1461 | 4 | 4 | 4 | <a href="#">G protein-coupled receptor for asthma susceptibility isoform A [Homo sapiens][gi:46395496]</a>          | GPCR-peptide |
| 34 | 803  | 4 | 4 | 4 | <a href="#">Galanin receptor type 2 (GAL2-R) (GALR2)[gi:6016094]</a>                                                | GPCR-peptide |
| 35 | 1040 | 4 | 4 | 4 | <a href="#">neuropeptide Y receptor Y1 [Homo sapiens][gi:4505445]</a>                                               | GPCR-peptide |
| 36 | 1359 | 4 | 4 | 4 | <a href="#">neuropeptide Y receptor Y2 [Homo sapiens][gi:4505447]</a>                                               | GPCR-peptide |
| 37 | 1861 | 4 | 4 | 4 | <a href="#">neuropeptides B/W receptor 1 [Homo sapiens][gi:119607128]</a>                                           | GPCR-peptide |
| 38 | 1778 | 4 | 4 | 4 | <a href="#">opioid receptor, kappa 1 [Homo sapiens][gi:39725940]</a>                                                | GPCR-peptide |
| 39 | 938  | 4 | 4 | 4 | <a href="#">thyroid stimulating hormone receptor [Homo sapiens][gi:38016895]</a>                                    | GPCR-peptide |
| 40 | PDSP | 4 | 4 | 4 | ADCYAP1R1                                                                                                           | GPCR-peptide |
| 41 | PDSP | 4 | 4 | 4 | V1A                                                                                                                 | GPCR-peptide |
| 42 | PDSP | 4 | 4 | 4 | V1B                                                                                                                 | GPCR-peptide |
| 43 | PDSP | 4 | 4 | 4 | V2                                                                                                                  | GPCR-peptide |
| 44 | PDSP | 4 | 4 | 4 | oxytocin                                                                                                            | GPCR-peptide |
| 45 | PDSP | 4 | 4 | 4 | CB-1 CANNABINOID                                                                                                    | GPCR-other   |
| 46 | 2058 | 4 | 4 | 4 | <a href="#">G protein-coupled receptor 35 [Homo sapiens][gi:33695097]</a>                                           | GPCR-other   |
| 47 | 449  | 4 | 4 | 4 | <a href="#">endothelial differentiation, sphingolipid G-protein-coupled receptor, 1 [Homo sapiens][gi:13027636]</a> | GPCR-other   |
| 48 | 373  | 4 | 4 | 4 | <a href="#">endothelial differentiation, sphingolipid G-protein-coupled receptor, 3 [Homo sapiens][gi:38788193]</a> | GPCR-other   |
| 49 | PDSP | 4 | 4 | 4 | EP-3                                                                                                                | GPCR-other   |
| 50 | PDSP | 4 | 4 | 4 | EP-4                                                                                                                | GPCR-other   |
| 51 | PDSP | 4 | 4 | 4 | GABA-B                                                                                                              | GPCR-other   |
| 52 | 940  | 4 | 4 | 4 | <a href="#">prostaglandin E receptor 2 (subtype EP2), 53kDa [Homo sapiens][gi:31881630]</a>                         | GPCR-other   |
| 53 | 1422 | 4 | 4 | 4 | <a href="#">prostaglandin E receptor 2 (subtype EP2), 53kDa [Homo sapiens][gi:31881630]</a>                         | GPCR-other   |
| 54 | 485  | 4 | 4 | 4 | <a href="#">sphingosine-1-phosphate receptor 3 [Homo sapiens][gi:38788193]</a>                                      | GPCR-other   |

|    |      |   |   |   |                                                                                |                                |
|----|------|---|---|---|--------------------------------------------------------------------------------|--------------------------------|
| 55 | 1510 | 4 | 4 | 4 | <a href="#">Sphingosine-1-phosphate receptor 4 [Homo sapiens][gi:15929025]</a> | GPCR-other                     |
| 56 | PDSP | 4 | 4 | 4 | GPR1                                                                           | GPCR-other                     |
| 57 | PDSP | 4 | 4 | 4 | GPR4                                                                           | GPCR-other                     |
| 58 | PDSP | 4 | 4 | 4 | GPR15                                                                          | GPCR-other                     |
| 59 | PDSP | 4 | 4 | 4 | GPR31                                                                          | GPCR-other                     |
| 60 | PDSP | 4 | 4 | 4 | GPR39                                                                          | GPCR-other                     |
| 61 | PDSP | 4 | 4 | 4 | GPR45                                                                          | GPCR-other                     |
| 62 | PDSP | 4 | 4 | 4 | GPR55                                                                          | GPCR-other                     |
| 63 | PDSP | 4 | 4 | 4 | GPR57                                                                          | GPCR-other                     |
| 64 | PDSP | 4 | 4 | 4 | GPR58                                                                          | GPCR-other                     |
| 65 | PDSP | 4 | 4 | 4 | GPR62                                                                          | GPCR-other                     |
| 66 | PDSP | 4 | 4 | 4 | GPR65                                                                          | GPCR-other                     |
| 67 | PDSP | 4 | 4 | 4 | GPR68                                                                          | GPCR-other                     |
| 68 | PDSP | 4 | 4 | 4 | GPR83                                                                          | GPCR-other                     |
| 69 | PDSP | 4 | 4 | 4 | GPR84                                                                          | GPCR-other                     |
| 70 | PDSP | 4 | 4 | 4 | GPR87                                                                          | GPCR-other                     |
| 71 | PDSP | 4 | 4 | 4 | GPR88                                                                          | GPCR-other                     |
| 72 | PDSP | 4 | 4 | 4 | GPR123                                                                         | GPCR-other                     |
| 73 | PDSP | 4 | 4 | 4 | GPR132                                                                         | GPCR-other                     |
| 74 | PDSP | 4 | 4 | 4 | GPR133                                                                         | GPCR-other                     |
| 75 | PDSP | 4 | 4 | 4 | GPR157                                                                         | GPCR-other                     |
| 76 | PDSP | 4 | 4 | 4 | GPR161                                                                         | GPCR-other                     |
| 77 | PDSP | 4 | 4 | 4 | GPR41                                                                          | GPCR-other                     |
| 78 | PDSP | 4 | 4 | 4 | GPR43                                                                          | GPCR-other                     |
| 79 | PDSP | 4 | 4 | 4 | P2Y1                                                                           | GPCR-other                     |
| 80 | PDSP | 4 | 4 | 4 | P2Y2                                                                           | GPCR-other                     |
| 81 | PDSP | 4 | 4 | 4 | P2Y4                                                                           | GPCR-other                     |
| 82 | PDSP | 4 | 4 | 4 | P2Y6                                                                           | GPCR-other                     |
| 83 | PDSP | 4 | 4 | 4 | P2Y11                                                                          | GPCR-other                     |
| 84 | PDSP | 4 | 4 | 4 | mGluR1                                                                         | GPCR-metabotropic<br>glutamate |

|     |      |        |        |        |                                                                                                                                                |                             |
|-----|------|--------|--------|--------|------------------------------------------------------------------------------------------------------------------------------------------------|-----------------------------|
| 85  | PDSP | 4      | 4      | 4      | mGluR2                                                                                                                                         | GPCR-metabotropic glutamate |
| 86  | PDSP | 4      | 4      | 4      | mGluR4                                                                                                                                         | GPCR-metabotropic glutamate |
| 87  | PDSP | 4      | 4      | 4      | mGluR5                                                                                                                                         | GPCR-metabotropic glutamate |
| 88  | PDSP | 4      | 4      | 4      | mGluR8                                                                                                                                         | GPCR-metabotropic glutamate |
| 89  | PDSP | 4      | 4      | 4      | I1-IMIDAZOLINE                                                                                                                                 | other receptor              |
| 90  | 861  | 4      | 4      | 4      | <a href="#">toll-like receptor 4 [Homo sapiens][gi:55662034]</a>                                                                               | other receptor              |
| 91  | 377  | 4      | 4      | 4      | <a href="#">ATP-binding cassette sub-family B member 1 [Homo sapiens][gi:42741659]</a>                                                         | transporter                 |
| 92  | 799  | 4      | 4      | 4      | <a href="#">ATP-binding cassette, sub-family C, member 1 isoform 1 [Homo sapiens][gi:134142337]</a>                                            | transporter                 |
| 93  | 1325 | 4      | 4      | 4      | <a href="#">ATP-binding cassette, sub-family G, member 2 [Homo sapiens][gi:62526033]</a>                                                       | transporter                 |
| 94  | PDSP | 4      | 4      | 4      | DAT                                                                                                                                            | transporter                 |
| 95  | 602  | 4      | 4      | 4      | multidrug resistance protein-1                                                                                                                 | transporter                 |
| 96  | PDSP | 4.4992 | 4.6753 | 4      | NET                                                                                                                                            | transporter                 |
| 97  | PDSP | 4.7894 | 4.4873 | 4.4346 | SERT                                                                                                                                           | transporter                 |
| 98  | PDSP | 5.618  | 4      | 5.6946 | 5-HT3 SEROTONIN                                                                                                                                | ion channel                 |
| 99  | 2227 | 4      | 4      | 4      | <a href="#">alternatively spliced Trp4 [Mus musculus][gi:2935630]</a>                                                                          | ion channel                 |
| 100 | PDSP | 4      | 4      | 4      | BZP BENZODIAZEPINE                                                                                                                             | ion channel                 |
| 101 | PDSP | 4      | 4      | 4      | CA++ CHANNEL                                                                                                                                   | ion channel                 |
| 102 | 1456 | 4      | 4      | 4      | <a href="#">electroneutral potassium-chloride cotransporter KCC2 [Homo sapiens][gi:12003227]</a>                                               | ion channel                 |
| 103 | PDSP | 4      | 4      | 4      | GABA-A                                                                                                                                         | ion channel                 |
| 104 | 624  | 4      | 4      | 4      | GIRK                                                                                                                                           | ion channel                 |
| 105 | 1448 | 4      | 4      | 4      | <a href="#">MCOLN3 protein [Homo sapiens][gi:38174238]</a>                                                                                     | ion channel                 |
| 106 | 2073 | 4      | 4      | 4      | <a href="#">Mint1 [Rattus norvegicus][gi:2625023]; calcium channel, voltage-dependent, N type, alpha 1B subunit [Homo sapiens][gi:4502523]</a> | ion channel                 |

|     |      |   |   |   |                                                                                                                                                    |                                          |
|-----|------|---|---|---|----------------------------------------------------------------------------------------------------------------------------------------------------|------------------------------------------|
| 107 | PDSP | 4 | 4 | 4 | NAR a/b2 NICOTINIC                                                                                                                                 | ion channel                              |
| 108 | PDSP | 4 | 4 | 4 | NAR a2/b2 NICOTINIC                                                                                                                                | ion channel                              |
| 109 | PDSP | 4 | 4 | 4 | NAR a2/b4 NICOTINIC                                                                                                                                | ion channel                              |
| 110 | PDSP | 4 | 4 | 4 | NAR a3/b2 NICOTINIC                                                                                                                                | ion channel                              |
| 111 | PDSP | 4 | 4 | 4 | NAR a3/b4 NICOTINIC                                                                                                                                | ion channel                              |
| 112 | PDSP | 4 | 4 | 4 | NAR a7 NICOTINIC                                                                                                                                   | ion channel                              |
| 113 | PDSP | 4 | 4 | 4 | NMDA                                                                                                                                               | ion channel                              |
| 114 | PDSP | 4 | 4 | 4 | PCP                                                                                                                                                | ion channel                              |
| 115 | 1672 | 4 | 5 | 4 | <a href="#">potassium inwardly-rectifying channel J2 [Mus musculus][gi:6680530]</a>                                                                | ion channel                              |
| 116 | 2156 | 4 | 4 | 4 | <a href="#">potassium voltage-gated channel KQT-like protein 2 [Rattus norvegicus][gi:18959272]</a>                                                | ion channel                              |
| 117 | 1511 | 4 | 4 | 4 | <a href="#">putative potassium channel subunit[gi:487738]</a>                                                                                      | ion channel                              |
| 118 | 1424 | 4 | 4 | 4 | <a href="#">transient receptor potential cation channel, subfamily N, member 1 [Danio rerio][gi:34330186]</a>                                      | ion channel                              |
| 119 | 1984 | 4 | 4 | 4 | <a href="#">nuclear receptor coactivator 3 [Mus musculus][gi:118026946]</a>                                                                        | nuclear<br>receptor/transcription factor |
| 120 | 560  | 4 | 4 | 4 | <a href="#">Nuclear receptor ROR-alpha (Retinoid-related orphan receptor-alpha) (Nuclear receptor RZR-alpha)[gi:548814]</a>                        | nuclear<br>receptor/transcription factor |
| 121 | 450  | 4 | 4 | 4 | <a href="#">nuclear receptor subfamily 3, group C, member 1 isoform gamma [Homo sapiens][gi:66528677]</a>                                          | nuclear<br>receptor/transcription factor |
| 122 | 525  | 4 | 4 | 4 | <a href="#">nuclear receptor subfamily 5, group A, member 1 [Homo sapiens][gi:20070193]</a>                                                        | nuclear<br>receptor/transcription factor |
| 123 | 1032 | 4 | 4 | 4 | <a href="#">peroxisome proliferative activated receptor gamma isoform 2 [Homo sapiens][gi:20336229]; NCOA2 protein [Homo sapiens][gi:62201602]</a> | nuclear<br>receptor/transcription factor |
| 124 | PDSP | 4 | 4 | 4 | ERa – estrogen receptor “a”                                                                                                                        | nuclear<br>receptor/transcription factor |
| 125 | PDSP | 4 | 4 | 4 | ERb – estrogen receptor “b”                                                                                                                        | nuclear<br>receptor/transcription factor |
| 126 | PDSP | 4 | 4 | 4 | ERR1 – estrogen receptor-related 1                                                                                                                 | nuclear<br>receptor/transcription factor |

|     |      |   |   |   |                                                                                                                                                                                         |                                          |
|-----|------|---|---|---|-----------------------------------------------------------------------------------------------------------------------------------------------------------------------------------------|------------------------------------------|
| 127 | PDSP | 4 | 4 | 4 | ERR2 – estrogen receptor-related 2                                                                                                                                                      | nuclear<br>receptor/transcription factor |
| 128 | PDSP | 4 | 4 | 4 | PR – progesterone receptor                                                                                                                                                              | nuclear<br>receptor/transcription factor |
| 129 | PDSP | 4 | 4 | 4 | RAR – retinoic acid receptor                                                                                                                                                            | nuclear<br>receptor/transcription factor |
| 130 | PDSP | 4 | 4 | 4 | RXR – retinoid X receptor                                                                                                                                                               | nuclear<br>receptor/transcription factor |
| 131 | PDSP | 4 | 4 | 4 | LXRa – liver X receptor “a”                                                                                                                                                             | nuclear<br>receptor/transcription factor |
| 132 | PDSP | 4 | 4 | 4 | LXRb – liver X receptor “b”                                                                                                                                                             | nuclear<br>receptor/transcription factor |
| 133 | PDSP | 4 | 4 | 4 | PPARa – peroxisome proliferator-activated receptor “alpha”                                                                                                                              | nuclear<br>receptor/transcription factor |
| 134 | PDSP | 4 | 4 | 4 | PPARb – peroxisome proliferator-activated receptor “beta”                                                                                                                               | nuclear<br>receptor/transcription factor |
| 135 | PDSP | 4 | 4 | 4 | FXR – farnesoid X receptor                                                                                                                                                              | nuclear<br>receptor/transcription factor |
| 136 | PDSP | 4 | 4 | 4 | SXR – steroid X receptor                                                                                                                                                                | nuclear<br>receptor/transcription factor |
| 137 | 1479 | 4 | 4 | 4 | <a href="#">thyroid hormone receptor, beta [Homo sapiens][gi:189491771]</a>                                                                                                             | nuclear<br>receptor/transcription factor |
| 138 | 357  | 4 | 4 | 4 | AP-1 transcription factor                                                                                                                                                               | transcription factor                     |
| 139 | 1477 | 4 | 4 | 4 | CBF (core binding factor)                                                                                                                                                               | transcription factor                     |
| 140 | 1496 | 4 | 4 | 4 | <a href="#">core-binding factor, beta subunit isoform 1 [Homo sapiens][gi:13124881]</a> ; <a href="#">runt-related transcription factor 1 isoform AML1c [Homo sapiens][gi:19923198]</a> | transcription factor                     |
| 141 | 662  | 4 | 4 | 4 | CREB                                                                                                                                                                                    | transcription factor                     |
| 142 | 629  | 4 | 4 | 4 | <a href="#">Estrogen receptor 1 co-activator</a>                                                                                                                                        | transcription factor                     |
| 143 | 633  | 4 | 4 | 4 | <a href="#">estrogen receptor beta isoform 1 co-activator</a>                                                                                                                           | transcription factor                     |
| 144 | 2098 | 4 | 4 | 4 | <a href="#">Hsf1 protein [Mus musculus][gi:62740231]</a>                                                                                                                                | transcription factor                     |
| 145 | 1910 | 4 | 4 | 4 | hypoxia-inducible factor 1                                                                                                                                                              | transcription factor                     |

|     |      |   |   |   |                                                                                                                                                                                             |                                           |
|-----|------|---|---|---|---------------------------------------------------------------------------------------------------------------------------------------------------------------------------------------------|-------------------------------------------|
| 146 | 1628 | 4 | 4 | 4 | insulin promoter                                                                                                                                                                            | transcription factor                      |
| 147 | 1700 | 4 | 4 | 4 | <a href="#">Kruppel-like factor 5 [Homo sapiens][gi:124263658]</a>                                                                                                                          | transcription factor                      |
| 148 | 630  | 4 | 4 | 4 | <a href="#">mothers against decapentaplegic homolog 3 [Homo sapiens][gi:5174513]</a>                                                                                                        | transcription factor                      |
| 149 | 1239 | 4 | 4 | 4 | <a href="#">nuclear factor kappa-B, subunit 1 [Homo sapiens][gi:34577122]; v-rel reticuloendotheliosis viral oncogene homolog A isoform 1 [Homo sapiens][gi:223468676]</a>                  | transcription factor                      |
| 150 | 445  | 4 | 4 | 4 | <a href="#">nuclear factor of kappa light polypeptide gene enhancer in B-cells inhibitor, alpha [Homo sapiens][gi:10092619]</a>                                                             | transcription factor                      |
| 151 | 1273 | 4 | 4 | 4 | <a href="#">proinsulin [Homo sapiens][gi:59036749]</a>                                                                                                                                      | transcription factor                      |
| 152 | 932  | 4 | 4 | 4 | <a href="#">signal transducer and activator of transcription 1 isoform alpha [Homo sapiens][gi:6274552]</a>                                                                                 | transcription factor                      |
| 153 | 446  | 4 | 4 | 4 | STAT inducible element                                                                                                                                                                      | transcription factor                      |
| 154 | 871  | 4 | 4 | 4 | <a href="#">STAT3 [Homo sapiens][gi:13272532]</a>                                                                                                                                           | transcription factor                      |
| 155 | 487  | 4 | 4 | 4 | TNFalpha Induced E-Selectin Expression                                                                                                                                                      | transcription factor                      |
| 156 | 924  | 4 | 4 | 4 | <a href="#">tumor protein p53 [Homo sapiens][gi:120407068]</a>                                                                                                                              | transcription factor                      |
| 157 | 438  | 4 | 4 | 4 | <a href="#">v-rel reticuloendotheliosis viral oncogene homolog A isoform 1 [Homo sapiens][gi:223468676]</a>                                                                                 | transcription factor                      |
| 158 | 1415 | 4 | 4 | 4 | <a href="#">guanine nucleotide binding protein, alpha activating polypeptide O isoform a [Homo sapiens][gi:10567816]; regulator of G-protein signaling 4 [Homo sapiens][gi:86301151]</a>    | GTPase activator and transcription factor |
| 159 | 1441 | 4 | 4 | 4 | <a href="#">guanine nucleotide binding protein, alpha activating polypeptide O isoform a [Homo sapiens][gi:10567816]; regulator of G-protein signalling 16 [Homo sapiens][gi:156416009]</a> | GTPase activator and transcription factor |
| 160 | 1814 | 4 | 4 | 4 | alpha-synuclein 5'-UTR                                                                                                                                                                      | translation factor                        |
| 161 | 1416 | 4 | 4 | 4 | <a href="#">eukaryotic translation initiation factor 2-alpha kinase 3 [Homo sapiens][gi:134304838]</a>                                                                                      | translation factor                        |
| 162 | 782  | 4 | 4 | 4 | <a href="#">eukaryotic translation initiation factor 4 gamma, 1 isoform 4 [Homo sapiens][gi:38201619]; eukaryotic translation initiation factor 4E [Mus musculus][gi:83627717]</a>          | translation factor                        |

|     |      |   |   |   |                                                                                                                                                                                                             |                    |
|-----|------|---|---|---|-------------------------------------------------------------------------------------------------------------------------------------------------------------------------------------------------------------|--------------------|
| 163 | 2012 | 4 | 4 | 4 | <a href="#">Eukaryotic translation initiation factor 4H [Homo sapiens][gi:45219878]</a>                                                                                                                     | translation factor |
| 164 | 2014 | 4 | 4 | 4 | <a href="#">poly(A) binding protein, cytoplasmic 1 [Homo sapiens][gi:46367787]</a>                                                                                                                          | translation factor |
| 165 | 761  | 4 | 4 | 4 | <a href="#">cell division cycle 42 (GTP binding protein, 25kDa) [Homo sapiens][gi:56202836]</a>                                                                                                             | GTPase             |
| 166 | 758  | 4 | 4 | 4 | <a href="#">GTP-binding protein (rab7)[gi:164058]</a>                                                                                                                                                       | GTPase             |
| 167 | 764  | 4 | 4 | 4 | <a href="#">Rac1 protein [Homo sapiens][gi:8574038]</a>                                                                                                                                                     | GTPase             |
| 168 | 2216 | 4 | 4 | 4 | Ran GTPase                                                                                                                                                                                                  | GTPase             |
| 169 | 759  | 4 | 4 | 4 | <a href="#">ras protein[gi:190938]</a>                                                                                                                                                                      | GTPase             |
| 170 | 760  | 4 | 4 | 4 | <a href="#">RecName: Full=Ras-related protein Rab-2A[gi:46577642]</a>                                                                                                                                       | GTPase             |
| 171 | 880  | 4 | 4 | 4 | <a href="#">RGS12; regulator of G-protein signalling 12 [Homo sapiens][gi:3290016]; guanine nucleotide binding protein (G protein), alpha inhibiting activity polypeptide 1 [Homo sapiens][gi:33946324]</a> | GTPase             |
| 172 | 1439 | 4 | 4 | 4 | <a href="#">RGS7[gi:1166512]; guanine nucleotide binding protein, alpha activating polypeptide O isoform a [Homo sapiens][gi:10567816]</a>                                                                  | GTPase             |
| 173 | 1789 | 4 | 4 | 4 | <a href="#">HSP90AA1 protein [Homo sapiens][gi:83318444]</a>                                                                                                                                                | ATPase             |
| 174 | 1481 | 4 | 4 | 4 | <a href="#">Valosin-containing protein [Homo sapiens][gi:111305821]</a>                                                                                                                                     | ATPase             |
| 175 | 524  | 4 | 4 | 4 | <a href="#">cAMP-dependent protein kinase catalytic subunit alpha isoform 1 [Homo sapiens][gi:4506055]</a>                                                                                                  | kinase             |
| 176 | 609  | 4 | 4 | 4 | MAP kinase                                                                                                                                                                                                  | kinase             |
| 177 | 995  | 4 | 4 | 4 | <a href="#">mitogen-activated protein kinase 1 [Homo sapiens][gi:66932916]</a>                                                                                                                              | kinase             |
| 178 | 530  | 4 | 4 | 4 | <a href="#">Mitogen-activated protein kinase 10 (Stress-activated protein kinase JNK3) (c-Jun N-terminal kinase 3) (MAP kinase p49 3F12)[gi:2499604]</a>                                                    | kinase             |
| 179 | 1529 | 4 | 4 | 4 | <a href="#">mitogen-activated protein kinase kinase kinase 3 isoform 1 [Homo sapiens][gi:42794767]</a>                                                                                                      | kinase             |
| 180 | 1530 | 4 | 4 | 4 | <a href="#">mitogen-activated protein kinase kinase kinase kinase 2 [Homo sapiens][gi:22035600]</a>                                                                                                         | kinase             |



|     |      |       |   |   |                                                                                                     |        |
|-----|------|-------|---|---|-----------------------------------------------------------------------------------------------------|--------|
| 181 | 797  | 4     | 4 | 4 | <a href="#">protein kinase D1 [Homo sapiens][gi:115529463]</a>                                      | kinase |
| 182 | 954  | 4     | 4 | 4 | <a href="#">pyruvate kinase 3 isoform 2 [Homo sapiens][gi:33286420]</a>                             | kinase |
| 183 | 1631 | 4     | 4 | 4 | <a href="#">pyruvate kinase, muscle isoform M2 [Homo sapiens][gi:33286418]</a>                      | kinase |
| 184 | 604  | 4     | 4 | 4 | <a href="#">Rho-associated, coiled-coil containing protein kinase 2 [Homo sapiens][gi:41872583]</a> | kinase |
| 185 | 2097 | 4     | 4 | 4 | <a href="#">glycogen synthase kinase 3 beta isoform 1 [Homo sapiens][gi:21361340]</a>               | kinase |
| 186 | 645  | 4     | 4 | 4 | Her2                                                                                                | kinase |
| 187 | 1486 | 4     | 4 | 4 | Janus kinase 2                                                                                      | kinase |
| 188 | 1321 | 4     | 4 | 4 | <a href="#">WEE1 homolog (S. pombe) [Homo sapiens][gi:47123300]</a>                                 | kinase |
| 189 | PDSP | 4     | 4 | 4 | <a href="#">MAPKAPK2</a>                                                                            | kinase |
| 190 | PDSP | 4     | 4 | 4 | <a href="#">AurA</a>                                                                                | kinase |
| 191 | PDSP | 4     | 4 | 4 | <a href="#">PKCz</a>                                                                                | kinase |
| 192 | PDSP | 4     | 4 | 4 | <a href="#">RSK1</a>                                                                                | kinase |
| 193 | PDSP | 4     | 4 | 4 | <a href="#">PRAK</a>                                                                                | kinase |
| 194 | PDSP | 4     | 4 | 4 | <a href="#">Erk1</a>                                                                                | kinase |
| 195 | PDSP | 4     | 4 | 4 | <a href="#">PKD2</a>                                                                                | kinase |
| 196 | PDSP | 4     | 4 | 4 | <a href="#">CK1d</a>                                                                                | kinase |
| 197 | PDSP | 4     | 4 | 4 | <a href="#">CHK1</a>                                                                                | kinase |
| 198 | PDSP | 4     | 4 | 4 | <a href="#">ABL</a>                                                                                 | kinase |
| 199 | PDSP | 4     | 4 | 4 | <a href="#">FYN</a>                                                                                 | kinase |
| 200 | PDSP | 4     | 4 | 4 | <a href="#">LYN</a>                                                                                 | kinase |
| 201 | PDSP | 5.702 | 4 | 4 | <a href="#">CHK2</a>                                                                                | kinase |
| 202 | PDSP | 4     | 4 | 4 | <a href="#">MET</a>                                                                                 | kinase |
| 203 | PDSP | 4     | 4 | 4 | <a href="#">LCK</a>                                                                                 | kinase |
| 204 | PDSP | 4     | 4 | 4 | <a href="#">SRC</a>                                                                                 | kinase |
| 205 | PDSP | 4     | 4 | 4 | <a href="#">Erk2</a>                                                                                | kinase |
| 206 | PDSP | 4     | 4 | 4 | <a href="#">PKA</a>                                                                                 | kinase |
| 207 | PDSP | 4     | 4 | 4 | <a href="#">AKT2</a>                                                                                | kinase |
| 208 | PDSP | 4     | 4 | 4 | <a href="#">INST</a>                                                                                | kinase |
| 209 | PDSP | 4     | 4 | 4 | <a href="#">p38a</a>                                                                                | kinase |

|     |      |   |   |   |                                                                                                                                                                                                                                             |             |
|-----|------|---|---|---|---------------------------------------------------------------------------------------------------------------------------------------------------------------------------------------------------------------------------------------------|-------------|
| 210 | PDSP | 4 | 4 | 4 | <a href="#">AKT1</a>                                                                                                                                                                                                                        | kinase      |
| 211 | PDSP | 4 | 4 | 4 | <a href="#">MSK1</a>                                                                                                                                                                                                                        | kinase      |
| 212 | 368  | 4 | 4 | 4 | <a href="#">cell division cycle 25B isoform 2 [Homo sapiens][gi:4757950]</a>                                                                                                                                                                | phosphatase |
| 213 | 374  | 4 | 4 | 4 | <a href="#">dual specificity phosphatase 1 [Homo sapiens][gi:4758204]</a>                                                                                                                                                                   | phosphatase |
| 214 | 1654 | 4 | 4 | 4 | <a href="#">dual specificity phosphatase 3 [Homo sapiens][gi:4758208]</a>                                                                                                                                                                   | phosphatase |
| 215 | 425  | 4 | 4 | 4 | <a href="#">dual specificity phosphatase 6 [Rattus norvegicus][gi:16758752]</a>                                                                                                                                                             | phosphatase |
| 216 | 1019 | 4 | 4 | 4 | <a href="#">intestinal alkaline phosphatase [Bos taurus][gi:68299797]</a>                                                                                                                                                                   | phosphatase |
| 217 | 1565 | 4 | 4 | 4 | <a href="#">phosphatase, orphan 1 isoform 1 [Homo sapiens][gi:219689097]</a>                                                                                                                                                                | phosphatase |
| 218 | 1987 | 4 | 4 | 4 | <a href="#">PPP5C protein [Homo sapiens][gi:37589898]</a>                                                                                                                                                                                   | phosphatase |
| 219 | 2235 | 4 | 4 | 4 | <a href="#">protein phosphatase 1, catalytic subunit, alpha isoform 3 [Homo sapiens][gi:56790945]</a>                                                                                                                                       | phosphatase |
| 220 | 1779 | 4 | 4 | 4 | <a href="#">protein tyrosine phosphatase, non-receptor type 22 (lymphoid) isoform 1 [Homo sapiens][gi:224586929]</a>                                                                                                                        | phosphatase |
| 221 | 606  | 4 | 4 | 4 | <a href="#">protein tyrosine phosphatase, non-receptor type 22 (lymphoid) isoform 1 [Homo sapiens][gi:224586929]</a> ; <a href="#">protein tyrosine phosphatase, non-receptor type 22 (lymphoid) isoform 2 [Homo sapiens][gi:224586931]</a> | phosphatase |
| 222 | 521  | 4 | 4 | 4 | <a href="#">protein tyrosine phosphatase, non-receptor type 7 isoform 2 [Homo sapiens][gi:18375660]</a>                                                                                                                                     | phosphatase |
| 223 | 1001 | 4 | 4 | 4 | <a href="#">tissue-nonspecific alkaline phosphatase precursor [Homo sapiens][gi:116734717]</a>                                                                                                                                              | phosphatase |
| 224 | 581  | 4 | 4 | 4 | <a href="#">Cathepsin G [Homo sapiens][gi:15680217]</a>                                                                                                                                                                                     | protease    |
| 225 | 798  | 4 | 4 | 4 | <a href="#">coagulation factor XI[gi:180352]</a>                                                                                                                                                                                            | protease    |
| 226 | 538  | 4 | 4 | 4 | <a href="#">complement component 1, s subcomponent [Homo sapiens][gi:4502495]</a>                                                                                                                                                           | protease    |
| 227 | 873  | 4 | 4 | 4 | <a href="#">kallikrein-related peptidase 5 preproprotein [Homo sapiens][gi:6912644]</a>                                                                                                                                                     | protease    |
| 228 | 751  | 4 | 4 | 4 | 26S proteasome                                                                                                                                                                                                                              | protease    |
| 229 | 923  | 4 | 4 | 4 | caspase-1                                                                                                                                                                                                                                   | protease    |

|     |      |   |   |   |                                                                                                                                                                                                                                            |                     |
|-----|------|---|---|---|--------------------------------------------------------------------------------------------------------------------------------------------------------------------------------------------------------------------------------------------|---------------------|
| 230 | 889  | 4 | 4 | 4 | <a href="#">Caspase-7 precursor (CASP-7) (ICE-like apoptotic protease 3) (ICE-LAP3) (Apoptotic protease Mch-3) (CMH-1) [Contains: Caspase-7 subunit p20; Caspase-7 subunit p11][gi:1730092]</a>                                            | protease            |
| 231 | 800  | 4 | 4 | 4 | <a href="#">Coagulation factor XII precursor (Hageman factor) (HAF) [Contains: Coagulation factor XIIa heavy chain; Beta-factor XIIa part 1; Beta-factor XIIa part 2; Coagulation factor XIIa light chain][gi:119763]</a>                  | protease            |
| 232 | 1046 | 4 | 4 | 4 | <a href="#">prothrombin [Homo sapiens][gi:339641]</a>                                                                                                                                                                                      | protease            |
| 233 | 927  | 4 | 4 | 4 | <a href="#">ubiquitin specific peptidase 2 isoform a [Homo sapiens][gi:188528692]</a>                                                                                                                                                      | protease            |
| 234 | 526  | 4 | 4 | 4 | ubiquitin-proteasome                                                                                                                                                                                                                       | protease            |
| 235 | 1236 | 4 | 4 | 4 | <a href="#">calpain II [Sus scrofa][gi:1628587]</a>                                                                                                                                                                                        | protease            |
| 236 | 453  | 4 | 4 | 4 | <a href="#">Cathepsin B [Homo sapiens][gi:63102437]</a>                                                                                                                                                                                    | protease            |
| 237 | 1906 | 4 | 4 | 4 | <a href="#">cathepsin L1 [Homo sapiens][gi:55958172]</a>                                                                                                                                                                                   | protease            |
| 238 | 501  | 4 | 4 | 4 | <a href="#">cathepsin S preproprotein [Homo sapiens][gi:23110962]</a>                                                                                                                                                                      | protease            |
| 239 | 436  | 4 | 4 | 4 | <a href="#">Ubiquitin carboxyl-terminal hydrolase BAP1 (BRCA1-associated protein 1) (Cerebral protein 6)[gi:68565074]</a>                                                                                                                  | protease            |
| 240 | 618  | 4 | 4 | 4 | <a href="#">matrix metalloproteinase 1 [Homo sapiens][gi:6690534]</a>                                                                                                                                                                      | protease            |
| 241 | 570  | 4 | 4 | 4 | <a href="#">matrix metalloproteinase 13 preproprotein [Homo sapiens][gi:4505209]</a>                                                                                                                                                       | protease            |
| 242 | 750  | 4 | 4 | 4 | MT1                                                                                                                                                                                                                                        | protease            |
| 243 | 900  | 4 | 4 | 4 | <a href="#">Caspase-1 precursor (CASP-1) (Interleukin-1 beta convertase) (IL-1BC) (IL-1 beta-converting enzyme) (ICE) (Interleukin-1 beta-converting enzyme) (p45) [Contains: Caspase-1 subunit p20; Caspase-1 subunit p10][gi:266321]</a> | protease            |
| 244 | 950  | 4 | 4 | 4 | <a href="#">Apoptosis regulator Bcl-2[gi:231632]</a>                                                                                                                                                                                       | apoptosis regulator |
| 245 | 951  | 4 | 4 | 4 | <a href="#">Apoptosis regulator Bcl-B (Bcl-2-like 10 protein) (Bcl2-L-10) (Anti-apoptotic protein NrH)[gi:23396469]</a>                                                                                                                    | apoptosis regulator |
| 246 | 432  | 4 | 4 | 4 | <a href="#">B-cell leukemia/lymphoma 2 related protein A1a [Mus musculus][gi:11024684]</a>                                                                                                                                                 | apoptosis regulator |
| 247 | 1008 | 4 | 4 | 4 | <a href="#">BCL2-related protein A1 isoform 1 [Homo sapiens][gi:4757840]</a>                                                                                                                                                               | apoptosis regulator |
| 248 | 952  | 4 | 4 | 4 | <a href="#">Bcl-w [Homo sapiens][gi:1572493]</a>                                                                                                                                                                                           | apoptosis regulator |

|     |      |   |   |   |                                                                                                                                                                                           |                       |
|-----|------|---|---|---|-------------------------------------------------------------------------------------------------------------------------------------------------------------------------------------------|-----------------------|
| 249 | 1007 | 4 | 4 | 4 | <a href="#">bcl-xL [Homo sapiens][gi:510901]</a>                                                                                                                                          | apoptosis regulator   |
| 250 | 1377 | 4 | 4 | 4 | caspase-8                                                                                                                                                                                 | apoptosis regulator   |
| 251 | 1009 | 4 | 4 | 4 | <a href="#">Mcl-1 [Homo sapiens][gi:7582271]</a>                                                                                                                                          | apoptosis regulator   |
| 252 | 2057 | 4 | 4 | 4 | <a href="#">Myeloid cell leukemia sequence 1 (BCL2-related) [Homo sapiens][gi:78070770]</a>                                                                                               | apoptosis regulator   |
| 253 | 2071 | 4 | 4 | 4 | <a href="#">NLR family, pyrin domain containing 1 isoform 1 [Homo sapiens][gi:14719829]</a>                                                                                               | apoptosis regulator   |
| 254 | 1578 | 4 | 4 | 4 | <a href="#">nucleotide-binding oligomerization domain containing 1 [Homo sapiens][gi:5174617]</a>                                                                                         | apoptosis regulator   |
| 255 | 1566 | 4 | 4 | 4 | <a href="#">nucleotide-binding oligomerization domain containing 2 [Homo sapiens][gi:11545912]</a>                                                                                        | apoptosis regulator   |
| 256 | 1443 | 4 | 4 | 4 | <a href="#">tumor necrosis factor (ligand) superfamily, member 10 [Homo sapiens][gi:4507593]</a>                                                                                          | apoptosis regulator   |
| 257 | 1018 | 4 | 4 | 4 | <a href="#">X-linked inhibitor of apoptosis [Homo sapiens][gi:8744934]</a>                                                                                                                | apoptosis regulator   |
| 258 | 422  | 4 | 4 | 4 | <a href="#">tyrosine 3-monooxygenase/tryptophan 5-monooxygenase activation protein, gamma polypeptide [Homo sapiens][gi:21464101]</a>                                                     | cell signalling       |
| 259 | 781  | 4 | 4 | 4 | <a href="#">tyrosine 3-monooxygenase/tryptophan 5-monooxygenase activation protein, zeta polypeptide [Bos taurus][gi:27807367]</a>                                                        | cell signalling       |
| 260 | 917  | 4 | 4 | 4 | <a href="#">Thrombopoietin (myeloproliferative leukemia virus oncogene ligand, megakaryocyte growth and development factor) [Homo sapiens][gi:120660324]</a>                              | cell signalling       |
| 261 | 457  | 4 | 4 | 4 | VCAM-1                                                                                                                                                                                    | cell adhesion         |
| 262 | 454  | 4 | 4 | 4 | VCAM-1                                                                                                                                                                                    | cell adhesion         |
| 263 | 875  | 4 | 4 | 4 | <a href="#">Chain A, Solution Structure Of The Brct-C Domain From Human Brca1[gi:159162802]</a>                                                                                           | cell cycle regulation |
| 264 | 429  | 4 | 4 | 4 | <a href="#">90-kda heat shock protein beta HSP90 beta [Homo sapiens][gi:4261762]; heat shock protein 90kDa alpha (cytosolic), class A member 1 isoform 2 [Homo sapiens][gi:154146191]</a> | chaperone             |
| 265 | 1203 | 4 | 4 | 4 | <a href="#">Heat shock 70kDa protein 1A [Homo sapiens][gi:12803275]</a>                                                                                                                   | chaperone             |

|     |        |   |     |   |                                                                                                                                                   |                        |
|-----|--------|---|-----|---|---------------------------------------------------------------------------------------------------------------------------------------------------|------------------------|
| 266 | 568    | 4 | 4   | 4 | <a href="#">heat shock 70kDa protein 8 isoform 1 [Homo sapiens][gi:5729877]; heat shock 70kDa protein 8 isoform 2 [Homo sapiens][gi:24234686]</a> | chaperone              |
| 267 | 410    | 5 | 4   | 4 | <a href="#">cytochrome P450, family 1, subfamily A, polypeptide 2 [Homo sapiens][gi:73915100]</a>                                                 | cytochrome P450        |
| 268 | 1851_1 | 4 | 4   | 4 | <a href="#">cytochrome P450, family 2, subfamily C, polypeptide 19 [Homo sapiens][gi:4503219]</a>                                                 | cytochrome P450        |
| 269 | 1851_5 | 4 | 4   | 4 | <a href="#">cytochrome P450, family 2, subfamily C, polypeptide 9 [Homo sapiens][gi:13699818]</a>                                                 | cytochrome P450        |
| 270 | 891    | 4 | 5.3 | 4 | <a href="#">cytochrome P450, family 2, subfamily D, polypeptide 6 isoform 1 [Homo sapiens][gi:40805836]</a>                                       | cytochrome P450        |
| 271 | 1851_2 | 4 | 5   | 4 | <a href="#">cytochrome P450, family 2, subfamily D, polypeptide 6 isoform 2 [Homo sapiens][gi:68509921]</a>                                       | cytochrome P450        |
| 272 | 885    | 4 | 5   | 4 | <a href="#">cytochrome P450, subfamily IIIA, polypeptide 4 [Homo sapiens][gi:13435386]</a>                                                        | cytochrome P450        |
| 273 | 1665   | 4 | 4   | 4 | <a href="#">beta-catenin [Homo sapiens][gi:4503131]</a>                                                                                           | cytoskeleton           |
| 274 | 1381   | 4 | 4   | 4 | dynein                                                                                                                                            | cytoskeleton           |
| 275 | 483    | 4 | 4   | 4 | <a href="#">Huntingtin (Huntington disease protein) (HD protein)[gi:1170192]</a>                                                                  | cytoskeleton           |
| 276 | 1688   | 4 | 4   | 4 | <a href="#">huntingtin [Homo sapiens][gi:90903231]</a>                                                                                            | cytoskeleton           |
| 277 | 528    | 4 | 4   | 4 | <a href="#">integrin alpha 4 precursor [Homo sapiens][gi:67191027]</a>                                                                            | cytoskeleton           |
| 278 | 1468   | 4 | 4   | 4 | <a href="#">Microtubule-associated protein tau [Homo sapiens][gi:92096784]</a>                                                                    | cytoskeleton           |
| 279 | 1817   | 4 | 4   | 4 | <a href="#">plectin 1 [Homo sapiens][gi:40849930]</a>                                                                                             | cytoskeleton           |
| 280 | 1463   | 4 | 4   | 4 | tau                                                                                                                                               | cytoskeleton           |
| 281 | 2205   | 4 | 4   | 4 | <a href="#">tubulin, beta [Homo sapiens][gi:29788785]</a>                                                                                         | cytoskeleton           |
| 282 | 1707   | 4 | 4   | 4 | DNA                                                                                                                                               | DNA                    |
| 283 | 1285   | 4 | 4   | 4 | <a href="#">amyloid precursor protein; APP [Homo sapiens][gi:257380]</a>                                                                          | DNA                    |
| 284 | 910    | 4 | 4   | 4 | <a href="#">beta globin [Homo sapiens][gi:4504349]</a>                                                                                            | RNA splicing component |
| 285 | 1459   | 4 | 4   | 4 | <a href="#">lamin A/C isoform 3 [Homo sapiens][gi:27436948]</a>                                                                                   | RNA splicing component |
| 286 | 1458   | 4 | 4   | 4 | <a href="#">survival of motor neuron 2, centromeric isoform d [Homo sapiens][gi:10937869]</a>                                                     | RNA splicing component |

|     |      |   |   |      |                                                                                                                                                                                                                                                                                          |                         |
|-----|------|---|---|------|------------------------------------------------------------------------------------------------------------------------------------------------------------------------------------------------------------------------------------------------------------------------------------------|-------------------------|
| 287 | 1235 | 4 | 4 | 4    | C3 complement component                                                                                                                                                                                                                                                                  | C3 complement inhibitor |
| 288 | 887  | 4 | 4 | 4    | <a href="#">15-lipoxygenase [Homo sapiens][gi:1832253]</a>                                                                                                                                                                                                                               | other enzyme            |
| 289 | 2100 | 4 | 4 | 5.25 | <a href="#">acid alpha-glucosidase preproprotein [Homo sapiens][gi:119393891]</a>                                                                                                                                                                                                        | other enzyme            |
| 290 | 1030 | 4 | 4 | 4    | <a href="#">aldehyde dehydrogenase 1 family, member A1 [Homo sapiens][gi:30582681]</a>                                                                                                                                                                                                   | other enzyme            |
| 291 | 2107 | 4 | 4 | 4    | <a href="#">alpha-galactosidase [Homo sapiens][gi:757912]</a>                                                                                                                                                                                                                            | other enzyme            |
| 292 | 1452 | 4 | 4 | 4    | <a href="#">arachidonate 12-lipoxygenase [Homo sapiens][gi:154426292]</a>                                                                                                                                                                                                                | other enzyme            |
| 293 | 881  | 4 | 4 | 4    | <a href="#">Arachidonate 15-lipoxygenase type II (15-LOX-2) (15-lipoxygenase 2)[gi:158515318]</a>                                                                                                                                                                                        | other enzyme            |
| 294 | 2147 | 4 | 4 | 4    | <a href="#">Chain A, Crystal Structure Of The Human 2-Oxoglutarate Oxygenase Loc390245[gi:221046486]</a>                                                                                                                                                                                 | other enzyme            |
| 295 | 1705 | 4 | 4 | 4    | <a href="#">Chain A, Human Ape1 Endonuclease With Bound Abasic Dna And Mn2+ Ion[gi:6980812]</a>                                                                                                                                                                                          | other enzyme            |
| 296 | 893  | 4 | 4 | 4    | <a href="#">Chain A, The Structure Of Wild-Type Human Hadh2 (17beta- Hydroxysteroid Dehydrogenase Type 10) Bound To Nad+ At 1.2 A[gi:122921310]; Chain B, The Structure Of Wild-Type Human Hadh2 (17beta- Hydroxysteroid Dehydrogenase Type 10) Bound To Nad+ At 1.2 A[gi:122921311]</a> | other enzyme            |
| 297 | 1229 | 4 | 4 | 4    | <a href="#">Dihyrolipoamide dehydrogenase [Homo sapiens][gi:17391426]</a>                                                                                                                                                                                                                | other enzyme            |
| 298 | 1947 | 4 | 4 | 4    | <a href="#">Fam108b protein [Mus musculus][gi:21595511]</a>                                                                                                                                                                                                                              | other enzyme            |
| 299 | 1868 | 4 | 4 | 4    | <a href="#">galactokinase 1 [Homo sapiens][gi:4503895]</a>                                                                                                                                                                                                                               | other enzyme            |
| 300 | 2101 | 4 | 4 | 4    | <a href="#">glucocerebrosidase [Homo sapiens][gi:496369]</a>                                                                                                                                                                                                                             | other enzyme            |
| 301 | 1020 | 4 | 4 | 4    | <a href="#">glucose-6-phosphate dehydrogenase isoform a [Homo sapiens][gi:109389365]</a>                                                                                                                                                                                                 | other enzyme            |
| 302 | 1974 | 4 | 4 | 4    | <a href="#">glutathione-S-transferase omega 1 [Homo sapiens][gi:4758484]</a>                                                                                                                                                                                                             | other enzyme            |
| 303 | 894  | 4 | 4 | 4    | <a href="#">hydroxyprostaglandin dehydrogenase 15-(NAD) [Homo sapiens][gi:31542939]; Chain A, Crystal Structure Of 15-Hydroxyprostaglandin Dehydrogenase Type1, Complexed With Nad+[gi:93279980]</a>                                                                                     | other enzyme            |

|     |      |   |   |   |                                                                                                                                                                                                                                                                               |                |
|-----|------|---|---|---|-------------------------------------------------------------------------------------------------------------------------------------------------------------------------------------------------------------------------------------------------------------------------------|----------------|
| 304 | 901  | 4 | 4 | 4 | <a href="#">Inositol monophosphatase (IMPase) (IMP) (Inositol-1(or 4)-monophosphatase) (Lithium-sensitive myo-inositol monophosphatase A1)[gi:44888968]</a>                                                                                                                   | other enzyme   |
| 305 | 2174 | 4 | 4 | 4 | <a href="#">lysophospholipase 1 [Homo sapiens][gi:5453722]</a>                                                                                                                                                                                                                | other enzyme   |
| 306 | 2177 | 4 | 4 | 4 | <a href="#">lysophospholipase II [Homo sapiens][gi:4581413]</a>                                                                                                                                                                                                               | other enzyme   |
| 307 | 1766 | 4 | 4 | 4 | <a href="#">menin isoform 1 [Homo sapiens][gi:18860839]; myeloid/lymphoid or mixed-lineage leukemia protein [Homo sapiens][gi:56550039]</a>                                                                                                                                   | other enzyme   |
| 308 | 1220 | 4 | 4 | 4 | <a href="#">MPI protein [Homo sapiens][gi:16878311]</a>                                                                                                                                                                                                                       | other enzyme   |
| 309 | 1274 | 4 | 4 | 4 | <a href="#">neutrophil cytosolic factor 1 [Homo sapiens][gi:115298672]</a>                                                                                                                                                                                                    | other enzyme   |
| 310 | 607  | 4 | 4 | 4 | <a href="#">phosphodiesterase 4B, cAMP-specific isoform 1 [Homo sapiens][gi:82799486]</a>                                                                                                                                                                                     | other enzyme   |
| 311 | 2130 | 4 | 4 | 4 | <a href="#">protein phosphatase methylesterase 1 [Homo sapiens][gi:7706645]</a>                                                                                                                                                                                               | other enzyme   |
| 312 | 623  | 4 | 4 | 4 | <a href="#">RCKbeta2 [Rattus norvegicus][gi:499328]</a>                                                                                                                                                                                                                       | other enzyme   |
| 313 | 784  | 4 | 4 | 4 | <a href="#">RecName: Full=Glucosylceramidase; AltName: Full=Beta-glucocerebrosidase; AltName: Full=Acid beta-glucosidase; AltName: Full=D-glucosyl-N-acylsphingosine glucohydrolase; AltName: Full=Alglucerase; AltName: Full=Imiglucerase; Flags: Precursor[gi:55584151]</a> | other enzyme   |
| 314 | 1457 | 4 | 4 | 4 | <a href="#">RecName: Full=Inositol monophosphatase; AltName: Full=Inositol-1(or 4)-monophosphatase; Short=IMPase; Short=IMP; AltName: Full=Lithium-sensitive myo-inositol monophosphatase A1[gi:44888968]</a>                                                                 | other enzyme   |
| 315 | 1515 | 4 | 4 | 4 | <a href="#">retinoblastoma binding protein 9 [Homo sapiens][gi:24119166]</a>                                                                                                                                                                                                  | other enzyme   |
| 316 | 2006 | 4 | 4 | 4 | <a href="#">ubiquitin-conjugating enzyme E2i [Homo sapiens][gi:4507785]; Ubiquitin-like modifier activating enzyme 2 [Homo sapiens][gi:13111961]; SUMO1 activating enzyme subunit 1 [Homo sapiens][gi:17390638]</a>                                                           | other enzyme   |
| 317 | 1385 | 4 | 4 | 4 | <a href="#">RAD51 [Homo sapiens][gi:49168602]</a>                                                                                                                                                                                                                             | other enzyme   |
| 318 | 2099 | 4 | 4 | 4 | GASC-1                                                                                                                                                                                                                                                                        | other enzyme   |
| 319 | 1656 | 4 | 4 | 4 | unknown target                                                                                                                                                                                                                                                                | unknown target |

|     |      |   |   |   |                |                |
|-----|------|---|---|---|----------------|----------------|
| 320 | 1222 | 4 | 4 | 4 | unknown target | unknown target |
| 321 | 1948 | 4 | 4 | 4 | unknown target | unknown target |
| 322 | 597  | 4 | 4 | 4 | unknown target | unknown target |
| 323 | 1865 | 4 | 4 | 4 | unknown target | unknown target |
| 324 |      |   |   |   |                |                |
