# Supplementary material
Source: PubMed Central journal article supplement (PMC3055689)
Supplement: npp2010195x4.pdf [file npp2010195x4.pdf]

| <b>Target</b> | <b>Database</b> | <b>UniProt and AC</b>       | <b>Target Description</b>                                                                                                                                                      |
|---------------|-----------------|-----------------------------|--------------------------------------------------------------------------------------------------------------------------------------------------------------------------------|
| 3BHS1_HUMAN   | both            | 3BH1_HUMAN;P14060;3beta-HSD | 3beta-hydroxysteroid dehydrogenase, progesterone reductase [-]                                                                                                                 |
| 5HT1A_HUMAN   | both            | P08908;5HT1A_HUMAN;5-HT1A   | 5-hydroxytryptamine 1A receptor (5-HT-1A) (Serotonin receptor 1A) (5-HT1A) (G-21);5-hydroxytryptamine 1A receptor, serotonergic receptor [-]                                   |
| 5HT1B_HUMAN   | both            | P28222;5HT1B_HUMAN;5-HT1B   | 5-hydroxytryptamine 1B receptor (5-HT-1B) (Serotonin receptor 1B) (5-HT-1D-beta) (Serotonin 1D beta receptor) (S12);5-hydroxytryptamine 1B receptor, serotonergic receptor [-] |
| 5HT1D_HUMAN   | both            | P28221;5HT1D_HUMAN;5-HT1D   | 5-hydroxytryptamine 1D receptor (5-HT-1D) (Serotonin receptor 1D) (5-HT-1D-alpha);5-hydroxytryptamine 1D receptor, serotonergic receptor [-]                                   |
| 5HT1E_HUMAN   | both            | P28566;5HT1E_HUMAN;5-HT1E   | 5-hydroxytryptamine 1E receptor (5-HT-1E) (Serotonin receptor 1E) (5-HT1E) (S31);5-hydroxytryptamine 1E receptor, serotonergic receptor [-]                                    |
| 5HT1F_HUMAN   | both            | P30939;5HT1F_HUMAN;5-HT1F   | 5-hydroxytryptamine 1F receptor (5-HT-1F) (Serotonin receptor 1F);5-hydroxytryptamine 1F receptor, serotonergic receptor [-]                                                   |
| 5HT2A_HUMAN   | both            | P28223;5HT2A_HUMAN;5-HT2A   | 5-hydroxytryptamine 2A receptor (5-HT-2A) (Serotonin receptor 2A) (5-HT-2);5-hydroxytryptamine 2A receptor, serotonergic receptor [-]                                          |
| 5HT2A_RAT     | both            | P14842;5HT2A_RAT;5-HT2      | 5-hydroxytryptamine 2A receptor (5-HT-2A) (Serotonin receptor 2A) (5-HT-2);5-hydroxytryptamine 2A receptor, serotonergic receptor [-]                                          |
| 5HT2B_HUMAN   | both            | P41595;5HT2B_HUMAN;5-HT2B   | 5-hydroxytryptamine 2B receptor (5-HT-2B) (Serotonin receptor 2B);5-hydroxytryptamine 2B receptor, serotonergic receptor [-]                                                   |
| 5HT2C_HUMAN   | both            | P28335;5HT2C_HUMAN;5-HT2C   | 5-hydroxytryptamine 2C receptor (5-HT-2C) (Serotonin receptor 2C) (5HT-1C);5-hydroxytryptamine 2C receptor, serotonergic receptor [-]                                          |
| 5HT3A_RAT     | both            | 5HT3_RAT;P35563;5-HT3       | 5-hydroxytryptamine 3 receptor, serotonergic receptor [-]                                                                                                                      |
| 5HT4R_CAVPO   | both            | O70528;5HT4R_CAVPO;5-HT4    | 5-hydroxytryptamine 4 receptor (5-HT-4) (Serotonin                                                                                                                             |

|             |      |                            |                                                                                                                                                                                                                                                                                               |
|-------------|------|----------------------------|-----------------------------------------------------------------------------------------------------------------------------------------------------------------------------------------------------------------------------------------------------------------------------------------------|
| 5HT5A_HUMAN | both | P47898;5HT5A_HUMAN;5-HT5A  | receptor 4) (5-HT4);5-hydroxytryptamine 4 receptor, serotonergic receptor [-]<br>5-hydroxytryptamine 5A receptor (5-HT-5A) (Serotonin receptor 5A) (5-HT-5);5-hydroxytryptamine 5A receptor, serotonergic receptor [-]                                                                        |
| 5HT6R_HUMAN | both | P50406;5HT6R_HUMAN;5-HT6   | 5-hydroxytryptamine 6 receptor (5-HT-6) (Serotonin receptor 6);5-hydroxytryptamine 6 receptor, serotonergic receptor [-]                                                                                                                                                                      |
| 5HT7R_HUMAN | both | P34969;5HT7R_HUMAN;5-HT7   | 5-hydroxytryptamine 7 receptor (5-HT-7) (Serotonin receptor 7) (5-HT-X) (5HT7);5-hydroxytryptamine 7 receptor, serotonergic receptor [-]                                                                                                                                                      |
| A4_HUMAN    | both | A4_HUMAN;P05067;beta-APP40 | Amyloid beta A4 protein precursor (APP) (ABPP) (Alzheimers disease amyloid protein) (Cerebral vascular amyloid peptide) (CVAP) (Protease nexin-II) (PN-II) (APPI) (PreA4) [Contains: (Soluble APP-alpha) (S-APP-alpha) ] [Contains: (Soluble APP-beta) (S-A...;amyloid-beta peptide(1-40) [-] |
| AA1R_HUMAN  | both | P30542;AA1R_HUMAN;A1       | Adenosine A1 receptor;adenosine A1 receptor [-]                                                                                                                                                                                                                                               |
| AA1R_MOUSE  | both | Q60612;AA1R_MOUSE;A1A      | Adenosine A1 receptor;adenosine A1 receptor [-]                                                                                                                                                                                                                                               |
| AA2AR_RAT   | both | P30543;AA2AR_RAT;A2        | Adenosine A2a receptor;adenosine A2 receptor [-]                                                                                                                                                                                                                                              |
| AA2BR_HUMAN | both | P29275;AA2BR_HUMAN;A2B     | Adenosine A2b receptor;adenosine A2B receptor [-]                                                                                                                                                                                                                                             |
| AA3R_RAT    | both | P28647;AA3R_RAT;A3         | Adenosine A3 receptor (TGPCR1);adenosine A3 receptor [-]                                                                                                                                                                                                                                      |
| ACES_BOVIN  | both | ACES_BOVIN;P23795;AChE     | Acetylcholinesterase precursor (AChE);acetylcholinesterase [-]                                                                                                                                                                                                                                |
| ACE_HUMAN   | both | ACE_HUMAN;P12821;ACE       | Angiotensin-converting enzyme, somatic isoform precursor (ACE) (Dipeptidyl carboxypeptidase I) (Kininase II) (CD143 antigen);angiotensin-converting enzyme, dipeptidyl carboxypeptidase I, kininase II [-]                                                                                    |
| ACHA7_RAT   | both | ACH7_RAT;Q05941;nAChR      | neuronal nicotinic acetylcholine receptor [-]                                                                                                                                                                                                                                                 |
| ACLY_RAT    | both | ACLY_RAT;P16638;ACL        | ATP-citrate synthase (ATP-citrate (pro-S)-lyase) (Citrate cleavage enzyme);ATP-citrate lyase [-]                                                                                                                                                                                              |
| ACM1_HUMAN  | both | P11229;ACM1_HUMAN;m1       | Muscarinic acetylcholine receptor M1;muscarinic acetylcholine receptor M1 [-]                                                                                                                                                                                                                 |
| ACM2_HUMAN  | both | P08172;ACM2_HUMAN;m2       | Muscarinic acetylcholine receptor M2;muscarinic acetylcholine receptor M2 [-]                                                                                                                                                                                                                 |
| ACM3_HUMAN  | both | P20309;ACM3_HUMAN;m3       | Muscarinic acetylcholine receptor M3;muscarinic acetylcholine receptor M3 [-]                                                                                                                                                                                                                 |

|             |      |                             |                                                                                                                                                                              |
|-------------|------|-----------------------------|------------------------------------------------------------------------------------------------------------------------------------------------------------------------------|
| ACM4_HUMAN  | both | P08173;ACM4_HUMAN;m4        | Muscarinic acetylcholine receptor M4;muscarinic acetylcholine receptor M4 [-]                                                                                                |
| ACM5_HUMAN  | both | P08912;ACM5_HUMAN;m5        | Muscarinic acetylcholine receptor M5;muscarinic acetylcholine receptor M5 [-]                                                                                                |
| ACOX1_RAT   | both | ACOX1_RAT;P07872;PalmCoA    | Acyl-coenzyme A oxidase 1, peroxisomal (Palmitoyl-CoA oxidase) (AOX);palmitoyl-CoA oxidase [-]                                                                               |
| ADA1A_HUMAN | both | P35348;ADA1A_HUMAN;alpha1c  | Alpha-1A adrenergic receptor (Alpha 1A-adrenoceptor) (Alpha 1A-adrenoreceptor) (Alpha-1C adrenergic receptor) (Alpha adrenergic receptor 1c);alpha1c adrenergic receptor [-] |
| ADA1A_RAT   | both | P43140;ADA1A_RAT;alpha      | Alpha-1A adrenergic receptor (Alpha 1A-adrenoceptor) (Alpha 1A-adrenoreceptor) (Alpha-1C adrenergic receptor);alpha1a adrenergic receptor [-]                                |
| ADA1B_HUMAN | both | P35368;ADA1B_HUMAN;alpha1b  | Alpha-1B adrenergic receptor (Alpha 1B-adrenoceptor) (Alpha 1B-adrenoreceptor);alpha1b adrenergic receptor [-]                                                               |
| ADA1D_HUMAN | both | P25100;ADA1D_HUMAN;alpha1d  | Alpha-1D adrenergic receptor (Alpha 1D-adrenoceptor) (Alpha 1D-adrenoreceptor) (Alpha-1A adrenergic receptor) (Alpha adrenergic receptor 1a);alpha1d adrenergic receptor [-] |
| ADA2A_HUMAN | both | P08913;ADA2A_HUMAN;alpha2a  | Alpha-2A adrenergic receptor (Alpha-2A adrenoceptor) (Alpha-2A adrenoreceptor) (Alpha-2AAR subtype C10);alpha2a adrenergic receptor [-]                                      |
| ADA2A_RAT   | both | P22909;ADA2A_RAT;alpha2     | Alpha-2A adrenergic receptor (Alpha-2A adrenoceptor) (Alpha-2A adrenoreceptor) (Alpha-2AAR) (CA2-47) (Alpha-2D adrenergic receptor);alpha2a adrenergic receptor [-]          |
| ADA2B_HUMAN | both | P18089;ADA2B_HUMAN;alpha2b  | Alpha-2B adrenergic receptor (Alpha-2B adrenoceptor) (Alpha-2B adrenoreceptor) (Subtype C2);alpha2b adrenergic receptor [-]                                                  |
| ADA2C_HUMAN | both | P18825;ADA2C_HUMAN;alpha2c  | Alpha-2C adrenergic receptor (Alpha-2C adrenoceptor) (Alpha-2C adrenoreceptor) (Subtype C4);alpha2c adrenergic receptor [-]                                                  |
| ADA_BOVIN   | both | ADA_BOVIN;P56658;ADA        | Adenosine deaminase (Adenosine aminohydrolase);adenosine deaminase [-]                                                                                                       |
| ADCY1_BOVIN | both | CYA1_BOVIN;P19754;AC-1      | adenylyl cyclase type I [-]                                                                                                                                                  |
| ADCY5_HUMAN | both | CYA5_HUMAN;O95622;AC-5      | adenylyl cyclase type V [-]                                                                                                                                                  |
| ADH1A_HUMAN | both | ADHA_HUMAN;P07327;ADH alpha | alcohol dehydrogenase [-]                                                                                                                                                    |

|             |      |                              |                                                                                                                                                                                                              |
|-------------|------|------------------------------|--------------------------------------------------------------------------------------------------------------------------------------------------------------------------------------------------------------|
| ADH1B_HUMAN | both | ADHB_HUMAN;P00325;ADH beta1  | alcohol dehydrogenase [-]                                                                                                                                                                                    |
| ADH1E_HORSE | both | ADHE_HORSE;P00327;ADH        | alcohol dehydrogenase [-]                                                                                                                                                                                    |
| ADH1G_HUMAN | both | ADHG_HUMAN;P00326;ADH gamma2 | alcohol dehydrogenase [-]                                                                                                                                                                                    |
| ADK_HUMAN   | both | ADK_HUMAN;P55263;AK          | Adenosine kinase (AK) (Adenosine 5-phosphotransferase);adenosine kinase, adenosine 5'-phosphotransferase [-]                                                                                                 |
| ADRB2_RAT   | both | P10608;ADRB2_RAT;beta2       | Beta-2 adrenergic receptor (Beta-2 adrenoceptor) (Beta-2 adrenoreceptor);beta2 adrenergic receptor [-]                                                                                                       |
| ADRB3_HUMAN | both | P13945;ADRB3_HUMAN;beta3     | Beta-3 adrenergic receptor (Beta-3 adrenoceptor) (Beta-3 adrenoreceptor);beta3 adrenergic receptor [-]                                                                                                       |
| AGTR1_HUMAN | both | P30556;AG2R_HUMAN;AT1        | type-1 angiotensin II receptor [-]                                                                                                                                                                           |
| AGTR2_RAT   | both | P35351;AG22_RAT;AT2          | type-2 angiotensin II receptor [-]                                                                                                                                                                           |
| AKT2_HUMAN  | both | AKT2_HUMAN;P31751;PKB-alpha  | RAC-beta serine/threonine-protein kinase (RAC-PK-beta) (Protein kinase Akt-2) (Protein kinase B, beta) (PKB beta);protein kinase B, beta, RAC-beta serine/threonine protein kinase, protein kinase Akt-2 [-] |
| AL5AP_HUMAN | both | FLAP_HUMAN;P20292;FLAP       | 5-lipoxygenase activating protein [-]                                                                                                                                                                        |
| ALDR_BOVIN  | both | ALDR_BOVIN;P16116;ALR1       | Aldose reductase (AR) (Aldehyde reductase) (20-alpha-hydroxysteroid dehydrogenase) (EC 1.1.1.149) (20-alpha-HSD);aldose reductase 1 [-]                                                                      |
| ALDR_RAT    | both | ALDR_RAT;P07943;ALR          | Aldose reductase (AR) (Aldehyde reductase);aldose reductase [-]                                                                                                                                              |
| ALK_HUMAN   | both | ALK_HUMAN;Q9UM73;ALK         | ALK tyrosine kinase receptor precursor (EC 2.7.10.1) (Anaplastic lymphoma kinase) (CD246 antigen).;anaplastic lymphoma kinase [-]                                                                            |
| AMP1_PLAFQ  | both | AMP1_PLAFQ;O96935;Pfa-M1     | zinc-aminopeptidase [Plasmodium falciparum];M1-family aminopeptidase [-]                                                                                                                                     |
| AMPB_RAT    | both | AMPB_RAT;O09175;APB          | Aminopeptidase B (Ap-B) (Arginyl aminopeptidase) (Arginine aminopeptidase) (Cytosol aminopeptidase IV);aminopeptidase B, arginyl aminopeptidase [-]                                                          |
| AMPD2_HUMAN | both | AMD2_HUMAN;Q01433;AMPDA      | AMP deaminase 2, AMP deaminase isoform L, erythrocyte AMP deaminase [-]                                                                                                                                      |
| AMPM2_HUMAN | both | AMP2_HUMAN;P50579;APP        | aminopeptidase P [-]                                                                                                                                                                                         |
| AMPM_ECOLI  | both | AMPM_ECOLI;P07906;MetAP1     | Methionine aminopeptidase (MAP) (Peptidase M);methionine aminopeptidase 1 [-]                                                                                                                                |
| ANDR_RAT    | both | ANDR_RAT;P15207;AR           | Androgen receptor (Dihydrotestosterone receptor);androgen receptor, dihydrotestosterone                                                                                                                      |

|             |      |                                       |                                                                                                                                                                                                                              |
|-------------|------|---------------------------------------|------------------------------------------------------------------------------------------------------------------------------------------------------------------------------------------------------------------------------|
| ANPRA_HUMAN | both | ANPA_HUMAN;P16066;ANPR-A              | receptor [-]                                                                                                                                                                                                                 |
| AOFA_RAT    | both | AOFA_RAT;P21396;MAO A                 | atrial natriuretic peptide receptor A [+]                                                                                                                                                                                    |
| AOFB_BOVIN  | both | AOFB_BOVIN;P56560;MAO B               | Amine oxidase [flavin-containing] A (Monoamine oxidase) (MAO-A);amine oxidase [flavin-containing] A [-]                                                                                                                      |
| APH1A_HUMAN | both | AP1A_HUMAN;Q96BI3;gamma-secretase     | Amine oxidase [flavin-containing] B (Monoamine oxidase) (MAO-B);amine oxidase [flavin-containing] B [-]                                                                                                                      |
| APH1B_HUMAN | both | AP1B_HUMAN;Q8WW43;APP/gamma-secretase | amyloid beta-peptide [-]                                                                                                                                                                                                     |
| AROC_STRPN  | both | AROC_STRPN;Q97Q57;CS                  | gamma-secretase [-]                                                                                                                                                                                                          |
| AT1A1_CANFA | both | A1A1_CANFA;P50997;Na(+)/K(+) ATPase   | Chorismate synthase (5-enolpyruvylshikimate-3-phosphate phospholyase);5-enolpyruvylshikimate-3-phosphate phospholyase [-]                                                                                                    |
| ATP4A_PIG   | both | ATP4A_PIG;P19156;H(+)/(K+)-ATPase     | sodium/potassium-transporting ATPase [-]                                                                                                                                                                                     |
| ATS4_HUMAN  | both | ATS4_HUMAN;O75173;aggrecanase         | Potassium-transporting ATPase alpha chain 1 (Proton pump) (Gastric H+/K+ ATPase alpha subunit);potassium-transporting ATPase [-]                                                                                             |
| AURKB_HUMAN | both | AURKB_HUMAN;Q96GD4;Aurora-B           | ADAMTS-4 precursor (A disintegrin and metalloproteinase with thrombospondin motifs 4) (ADAM-TS 4) (ADAM-TS4) (Aggrecanase 1) (ADMP-1);a disintegrin and metalloproteinase with thrombospondin motifs 4, ADAMTS-4 [-]         |
| BACE1_HUMAN | both | BAE1_HUMAN;P56817;beta-secretase 1    | Serine/threonine-protein kinase 12 (Aurora- and Ipl1-like midbody-associated protein 1) (AIM-1) (Aurora/IPL1-related kinase 2) (Aurora-related kinase 2) (STK-1) (Aurora-B);serine/threonine-protein kinase 12, aurora-B [-] |
| BACE2_HUMAN | both | BAE2_HUMAN;Q9Y5Z0;beta-secretase      | aspartyl protease 2, beta-site amyloid precursor protein cleaving enzyme 1, memapsin-2 [-]                                                                                                                                   |
| BAD_HUMAN   | both | BAD_HUMAN;Q92934;Bcl-xL               | aspartyl protease 1, beta-site amyloid precursor protein cleaving enzyme, memapsin-1 [-]                                                                                                                                     |
| BKRB2_RAT   | both | P25023;BKRB2_RAT;BK                   | Bcl2-antagonist of cell death (BAD) (Bcl-2 binding component 6) (Bcl-XL/Bcl-2 associated death promoter) (Bcl-2-like 8 protein);Bcl2-antagonist of cell death, BAD, Bcl-xL/Bcl-2 associated death promoter [-]               |
| BRAF1_HUMAN | both | BRAF1_HUMAN;P15056;B-Raf              | B2 bradykinin receptor (BK-2 receptor) (B2R);B2 bradykinin receptor [-]                                                                                                                                                      |
|             |      |                                       | B-Raf proto-oncogene serine/threonine-protein kinase (p94) (v-Raf murine sarcoma viral oncogene                                                                                                                              |

|             |      |                                  |                                                                                                                                                                                                                         |
|-------------|------|----------------------------------|-------------------------------------------------------------------------------------------------------------------------------------------------------------------------------------------------------------------------|
| C1R_HUMAN   | both | C1R_HUMAN;P00736;C1r             | homolog B1);B-Raf proto-oncogene serine/threonine-protein kinase [-]<br>Complement C1r subcomponent precursor (Complement component 1, r subcomponent);complement C1r component [-]                                     |
| C5AR_HUMAN  | both | P79188;C5AR_HUMAN;C5a-R          | C5a anaphylatoxin chemotactic receptor (C5a-R) (C5aR) (CD88 antigen);C5a anaphylatoxin chemotactic receptor [-]                                                                                                         |
| CAC1B_HUMAN | both | CCAB_HUMAN;Q00975;Ca(2+) channel | voltage-dependent N-type calcium channel [-]                                                                                                                                                                            |
| CAH1_HUMAN  | both | CAH1_HUMAN;P00915;CA-I           | Carbonic anhydrase I (Carbonate dehydratase I) (CA-I) (Carbonic anhydrase B);carbonic anhydrase I [-]                                                                                                                   |
| CAH2_BOVIN  | both | CAH2_BOVIN;P00921;CA             | Carbonic anhydrase II (Carbonate dehydratase II) (CA-II);carbonic anhydrase [-]                                                                                                                                         |
| CAH2_HUMAN  | both | CAH2_HUMAN;P00918;CA-II          | Carbonic anhydrase II (Carbonate dehydratase II) (CA-II) (Carbonic anhydrase C);carbonic anhydrase II [-]                                                                                                               |
| CAH4_BOVIN  | both | CAH4_BOVIN;Q95323;CA-IV          | Carbonic anhydrase IV precursor (Carbonate dehydratase IV) (CA-IV);carbonic anhydrase IV [-]                                                                                                                            |
| CAH5A_HUMAN | both | CAH5A_HUMAN;P35218;CA-VA         | Carbonic anhydrase VA, mitochondrial precursor (Carbonate dehydratase VA) (CA-VA);carbonic anhydrase VA, carbonate dehydratase VA [-]                                                                                   |
| CAH5A_MOUSE | both | CAH5A_MOUSE;P23589;CA-V          | Carbonic anhydrase VA, mitochondrial precursor (Carbonate dehydratase VA) (CA-VA) (CA Y);carbonic anhydrase VA, mitochondrial [-]                                                                                       |
| CAH5B_HUMAN | both | CAH5B_HUMAN;Q9Y2D0;CA-VB         | Carbonic anhydrase VB, mitochondrial precursor (Carbonate dehydratase VB) (CA-VB);carbonic anhydrase VB, carbonate dehydratase VB [-]                                                                                   |
| CAH9_HUMAN  | both | CAH9_HUMAN;Q16790;CA-IX          | Carbonic anhydrase IX precursor (Carbonate dehydratase IX) (CA-IX) (CAIX) (Membrane antigen MN) (P54/58N) (Renal cell carcinoma-associated antigen G250) (RCC-associated antigen G250) (pMW1);carbonic anhydrase IX [-] |
| CAN1_HUMAN  | both | CAN1_HUMAN;P07384;calpain        | Calpain 1, large [catalytic] subunit (Calcium-activated neutral proteinase) (CANP) (Mu-type) (muCANP) (Micromolar-calpain);calcium-activated neutral proteinase [-]                                                     |
| CAN1_PIG    | both | CAN1_PIG;P35750;calpain 1        | Calpain 1, large [catalytic] subunit (Calcium-activated neutral proteinase) (CANP) (Mu-type) (muCANP) (Micromolar-calpain);calcium-activated                                                                            |

|             |      |                               |                                                                                                                                                                                                                                                              |
|-------------|------|-------------------------------|--------------------------------------------------------------------------------------------------------------------------------------------------------------------------------------------------------------------------------------------------------------|
| CAN2_PIG    | both | CAN2_PIG;P43367;calpain 2     | neutral proteinase [-]<br>Calpain 2, large [catalytic] subunit (Calcium-activated neutral proteinase) (CANP) (M-type) (M-calpain) (Millimolar-calpain);M-calpain, calpain large polypeptide L2 [-]                                                           |
| CASP2_HUMAN | both | ICE2_HUMAN;P42575;caspase-2   | ICH-1 protease [-]                                                                                                                                                                                                                                           |
| CASP3_HUMAN | both | ICE3_HUMAN;P42574;caspase-3   | cysteine protease CPP32, apopain [-]                                                                                                                                                                                                                         |
| CASP9_HUMAN | both | ICE9_HUMAN;P55211;caspase-9   | apoptotic protease Mch-6 [-]                                                                                                                                                                                                                                 |
| CATD_BOVIN  | both | CATD_BOVIN;P80209;cathepsin D | Cathepsin D precursor;cathepsin D [-]                                                                                                                                                                                                                        |
| CATE_HUMAN  | both | CATE_HUMAN;P14091;cathepsin E | Cathepsin E precursor;cahepsin E [-]                                                                                                                                                                                                                         |
| CATG_HUMAN  | both | CATG_HUMAN;P08311;cathepsin G | Cathepsin G precursor (CG);cathepsin G [-]                                                                                                                                                                                                                   |
| CATH_HUMAN  | both | CATH_HUMAN;P09668;cathepsin H | Cathepsin H precursor;cathepsin H [-]                                                                                                                                                                                                                        |
| CATK_HUMAN  | both | CATK_HUMAN;P43235;cathepsin K | Cathepsin K precursor (Cathepsin O) (Cathepsin X) (Cathepsin O2);cathepsin K [-]                                                                                                                                                                             |
| CATL1_HUMAN | both | CATL_HUMAN;P07711;cathepsin L | major excreted protein [-]                                                                                                                                                                                                                                   |
| CATL2_HUMAN | both | CSL2_HUMAN;O60911;cathepsin V | cathepsin L2, cathepsin U [-]                                                                                                                                                                                                                                |
| CBPA1_BOVIN | both | CBP1_BOVIN;P00730;CPA         | carboxypeptidase A1 [-]                                                                                                                                                                                                                                      |
| CCKAR_CAVPO | both | Q63931;CCKAR_CAVPO;CCK1       | Cholecystokinin type A receptor (CCK-A receptor) (CCK-AR);cholecystokinin type A receptor [-]                                                                                                                                                                |
| CCR1_HUMAN  | both | P32246;CCR1_HUMAN;CCR1        | C-C chemokine receptor type 1 (C-C CKR-1) (CC-CKR-1) (CCR-1) (CCR1) (Macrophage inflammatory protein-1 alpha receptor) (MIP-1alpha-R) (RANTES-R) (HM145) (LD78 receptor);C-C chemokine receptor type 1, macrophage inflammatory protein-1 alpha receptor [-] |
| CCR3_HUMAN  | both | P51677;CCR3_HUMAN;CCR3        | C-C chemokine receptor type 3 (C-C CKR-3) (CC-CKR-3) (CCR-3) (CCR3) (CKR3) (Eosinophil eotaxin receptor);C-C chemokine receptor type 3, CD183 antigen [-]                                                                                                    |
| CCR4_HUMAN  | both | P30991;CCR4_HUMAN;CXCR4       | C-C chemokine receptor type 4 (C-C CKR-4) (CC-CKR-4) (CCR-4) (CCR4) (K5-5);C-X-C chemokine receptor type 4, CD184 antigen [-]                                                                                                                                |
| CCR5_HUMAN  | both | P32302;CCR5_HUMAN;CCR5        | C-C chemokine receptor type 5 (C-C CKR-5) (CC-CKR-5) (CCR-5) (CCR5) (HIV-1 fusion coreceptor) (CHEMR13) (CD195 antigen);C-X-C chemokine receptor type 5 [-]                                                                                                  |
| CCR8_HUMAN  | both | CCR8_HUMAN;P51685;CCR8        | C-C chemokine receptor type 8 (C-C CKR-8) (CC-CKR-8) (CCR-8) (GPR-CY6) (GPRCY6) (Chemokine receptor-like 1) (CKR-L1) (TER1)                                                                                                                                  |

|             |      |                                  |                                                                                                                                                                                                                  |
|-------------|------|----------------------------------|------------------------------------------------------------------------------------------------------------------------------------------------------------------------------------------------------------------|
| CD4_HUMAN   | both | CD4_HUMAN;P01730;CD4             | (CMKBRL2) (CC- chemokine receptor CHEMR1) (CDw198 antigen).;C-C chemokine receptor type 8 [-]<br>T-cell surface glycoprotein CD4 precursor (T-cell surface antigen T4/Leu-3);T-cell surface glycoprotein CD4 [-] |
| CDC2_HUMAN  | both | CDC2_HUMAN;P06493;CDK1/cyclin A  | Cell division control protein 2 homolog (p34 protein kinase) (Cyclin-dependent kinase 1) (CDK1);cyclin-dependent kinase 1 [-]                                                                                    |
| CDD_HUMAN   | both | CDD_HUMAN;P32320;CDA             | Cytidine deaminase (Cytidine aminohydrolase);cytidine deaminase, cytidine aminohydrolase [-]                                                                                                                     |
| CDK2_HUMAN  | both | CDK2_HUMAN;P24941;CDK2/cyclin A3 | Cell division protein kinase 2 (p33 protein kinase);cyclin-dependent kinase 2 [-]                                                                                                                                |
| CDK4_HUMAN  | both | CDK4_HUMAN;P11802;CDK4/cyclin D  | Cell division protein kinase 4 (Cyclin-dependent kinase 4) (PSK-J3);cyclin-dependent kinase 4 [-]                                                                                                                |
| CDK6_HUMAN  | both | CDK6_HUMAN;Q00534;CDK6/cyclin V  | Cell division protein kinase 6 (Serine/threonine-protein kinase PLSTIRE);cyclin-dependent kinase 6 [-]                                                                                                           |
| CEL2A_PIG   | both | EL2_PIG;P08419;PPE               | elastase 2 [-]                                                                                                                                                                                                   |
| CETP_HUMAN  | both | CETP_HUMAN;P11597;CETP           | Cholesteryl ester transfer protein precursor (Lipid transfer protein I);cholesteryl ester transfer protein, lipid transfer protein I [-]                                                                         |
| CHK1_HUMAN  | both | CHK1_HUMAN;O14757;ChK1           | Serine/threonine-protein kinase Chk1;checkpoint kinase 1 [-]                                                                                                                                                     |
| CHK2_HUMAN  | both | CHK2_HUMAN;O96017;ChK2           | Serine/threonine-protein kinase Chk2 (Cds1);serine/threonine-protein kinase Chk2, Cds1 [-]                                                                                                                       |
| CHLE_HUMAN  | both | CHLE_HUMAN;P06276;BChE           | Cholinesterase precursor (Acylcholine acylhydrolase) (Choline esterase II) (Butyrylcholine esterase) (Pseudocholinesterase);butyrylcholinesterase [-]                                                            |
| CMA1_HUMAN  | both | MCT1_HUMAN;P23946;chymase        | mast cell protease I [-]                                                                                                                                                                                         |
| CNR1_RAT    | both | P20272;CNR1_RAT;CB1              | Cannabinoid receptor 1 (CB1) (CB-R) (Brain-type cannabinoid receptor);central cannabinoid receptor [-]                                                                                                           |
| CNR2_MOUSE  | both | P47936;CNR2_MOUSE;CB2            | Cannabinoid receptor 2 (CB2) (CB-2);cannabinoid receptor 2 [-]                                                                                                                                                   |
| CP17A_HUMAN | both | CPT7_HUMAN;P05093;Cyt-P450-17a   | 17alpha-hydroxylase/C17,20-Lyase [-]                                                                                                                                                                             |
| CP19A_HUMAN | both | CPV1_HUMAN;P11511;aromatase      | estrogen synthetase, cytochrome P450 19A1 [-]                                                                                                                                                                    |



|             |      |                                  |                                                                                                                                                                                                                      |
|-------------|------|----------------------------------|----------------------------------------------------------------------------------------------------------------------------------------------------------------------------------------------------------------------|
| CP1A1_HUMAN | both | CP11_HUMAN;P04798;Cyt-P450-1A1   | cytochrome P450 1A1 [-]                                                                                                                                                                                              |
| CP1A2_HUMAN | both | CP12_HUMAN;P05177;Cyt-P450-1A2   | cytochrome P450 1A2 [-]                                                                                                                                                                                              |
| CP1B1_HUMAN | both | CP1B_HUMAN;Q16678;Cyt-P450-1B1   | cytochrome P450 1B1 [-]                                                                                                                                                                                              |
| CP24A_HUMAN | both | CP24A_HUMAN;Q07973;Cyt-P450-24   | Cytochrome P450 24A1, mitochondrial precursor (EC 1.14.-.-) (P450- CC24) (Vitamin D(3) 24-hydroxylase) (1,25-dihydroxyvitamin D(3) 24-hydroxylase) (24-OHase).;cytochrome P450 24A1, vitamin D(3) 24-hydroxylase [-] |
| CP2A6_HUMAN | both | CP2A6_HUMAN;P11509;Cyt-P450-2A6  | Cytochrome P450 2A6 (CYP1IA6) (Coumarin 7-hydroxylase) (IIA3) (CYP2A3) (P450(I));cytochrome P450 2A6 [-]                                                                                                             |
| CP2B6_HUMAN | both | CP2B6_HUMAN;P20813;Cyt-P450-2B6  | Cytochrome P450 2B6 (CYP1IB6) (P450 IIB1);cytochrome P450 2B6 [-]                                                                                                                                                    |
| CP2C9_HUMAN | both | CPC9_HUMAN;P11712;Cyt-P450-2C9   | cytochrome P450 2C9, (R)-limonene 6-monooxygenase [-]                                                                                                                                                                |
| CP2CI_HUMAN | both | CPCI_HUMAN;P33260;Cyt-P450-2C18  | cytochrome P450 2C18 [-]                                                                                                                                                                                             |
| CP2CJ_HUMAN | both | CPCJ_HUMAN;P33261;Cyt-P450-2C19  | (R)-limonene 6-monooxygenase [-]                                                                                                                                                                                     |
| CP2D6_HUMAN | both | CPD6_HUMAN;P10635;Cyt-P450-2D6   | debrisoquine 4-hydroxylase [-]                                                                                                                                                                                       |
| CP2DQ_RAT   | both | CPD2_RAT;P10634;Cyt-P450-2D2     | cytochrome P450 2D2 [-]                                                                                                                                                                                              |
| CP2E1_HUMAN | both | CP2E1_HUMAN;P05181;Cyt-P450-2E1  | Cytochrome P450 2E1 (CYP1IE1) (P450-J);cytochrome P450 2E1 [-]                                                                                                                                                       |
| CP3A4_HUMAN | both | CP34_HUMAN;P08684;Cyt-P450-3A4   | quinine 3-monooxygenase, nifedipine oxidase [-]                                                                                                                                                                      |
| CP4F2_HUMAN | both | CPF2_HUMAN;P78329;Cyt-P450-4AF2  | cytochrome P450 4F2 [-]                                                                                                                                                                                              |
| CPT1A_RAT   | both | CPT1_RAT;P32198;CPT-1            | carnitine O-palmitoyltransferase I [-]                                                                                                                                                                               |
| CRFR1_RAT   | both | P35353;CRFR1_RAT;CRH-R1          | Corticotropin releasing factor receptor 1 precursor (CRF-R) (CRF1) (Corticotropin-releasing hormone receptor 1) (CRH-R 1);corticotropin releasing factor receptor 1, corticotropin-releasing hormone receptor 1 [-]  |
| CSF1R_HUMAN | both | KFMS_HUMAN;P07333;CSF-1R         | macrophage colony stimulating factor I receptor, CD115 antigen [-]                                                                                                                                                   |
| CTRB1_HUMAN | both | CTRB_HUMAN;P17538;chymotrypsin B | chymotrypsinogen B [-]                                                                                                                                                                                               |
| CXCR1_HUMAN | both | P25024;CXCR1_HUMAN;CXCR1         | High affinity interleukin-8 receptor A (IL-8R A) (IL-8 receptor type 1) (CXCR-1) (CDw128a);high affinity interleukin-8 receptor A, C-X-C chemokine receptor type 1 [-]                                               |
| CXCR2_HUMAN | both | P25025;CXCR2_HUMAN;CXCR2         | High affinity interleukin-8 receptor B (IL-8R B) (CXCR-2) (GRO/MGSA receptor) (IL-8 receptor type 2) (CDw128b);high affinity interleukin-8                                                                           |

|            |      |                             |                                                                                                                                                                                                                                                                    |
|------------|------|-----------------------------|--------------------------------------------------------------------------------------------------------------------------------------------------------------------------------------------------------------------------------------------------------------------|
| CYNT_HELPY | both | CYNT_HELPY;O24855;hpCA      | receptor B, C-X-C chemokine receptor type 2 [-]<br>Carbonic anhydrase 1 (EC 4.2.1.1).;carbonic anhydrase 1                                                                                                                                                         |
| CYSP_TRYCR | both | CYSP_TRYCR;P25779;cruzipain | Cruzipain precursor (Major cysteine proteinase) (Cruzaine);cruzaine, major cysteine proteinase [-]                                                                                                                                                                 |
| DCMC_HUMAN | both | DCMC_HUMAN;O95822;MCD       | Malonyl-CoA decarboxylase, mitochondrial precursor (EC 4.1.1.9) (MCD).;malonyl-CoA decarboxylase, mitochondrial [-]                                                                                                                                                |
| DCOR_RAT   | both | DCOR_RAT;P09057;ODCase      | Ornithine decarboxylase (ODC);ornithine decarboxylase [-]                                                                                                                                                                                                          |
| DEF_ECOLI  | both | DEF_ECOLI;P27251;PDF-Ni     | Peptide deformylase (PDF) (Polypeptide deformylase);peptide deformylase [-]                                                                                                                                                                                        |
| DHB1_HUMAN | both | DHB1_HUMAN;P14061;17b-HSD1  | Estradiol 17-beta-dehydrogenase 1 (17-beta-HSD 1) (Placental 17-beta-hydroxysteroid dehydrogenase) (20 alpha-hydroxysteroid dehydrogenase) (20-alpha-HSD) (E2DH);estradiol 17-beta-dehydrogenase 1, placental 17-beta-hydroxysteroid dehydrogenase [-]             |
| DHB2_HUMAN | both | DHB2_HUMAN;P37059;17b-HSD2  | Estradiol 17-beta-dehydrogenase 2 (17-beta-HSD 2) (Microsomal 17-beta-hydroxysteroid dehydrogenase) (20 alpha-hydroxysteroid dehydrogenase) (20-alpha-HSD) (E2DH);corticosteroid 11-beta-dehydrogenase, isozyme 2, 11-beta-hydroxysteroid dehydrogenase type 2 [-] |
| DHB3_HUMAN | both | DHB3_HUMAN;P37058;17b-HSD3  | Estradiol 17-beta-dehydrogenase 3 (17-beta-HSD 3) (Testicular 17-beta-hydroxysteroid dehydrogenase);estradiol 17-beta-dehydrogenase 3, testicular 17-beta-hydroxysteroid dehydrogenase [-]                                                                         |
| DHI1_MOUSE | both | DHI1_MOUSE;P50172;11b-HSD1  | Corticosteroid 11-beta-dehydrogenase, isozyme 1 (11-DH) (11-beta-hydroxysteroid dehydrogenase 1) (11-beta-HSD1) (11beta-HSD1A);corticosteroid 11-beta-dehydrogenase, isozyme 1, 11-beta-hydroxysteroid dehydrogenase 1 [-]                                         |
| DHI2_HUMAN | both | DHI2_HUMAN;P80365;11b-HSD2  | Corticosteroid 11-beta-dehydrogenase, isozyme 2 (11-DH2) (11-beta-hydroxysteroid dehydrogenase type 2) (11-beta-HSD2) (NAD-dependent 11-beta-hydroxysteroid dehydrogenase);corticosteroid 11-beta-dehydrogenase, isozyme 2, 11-beta-                               |

|             |      |                                       |                                                                                                                                                                                    |
|-------------|------|---------------------------------------|------------------------------------------------------------------------------------------------------------------------------------------------------------------------------------|
| DHSO_HUMAN  | both | DHSO_HUMAN;Q00796;SDHase              | hydroxysteroid dehydrogenase type 2 [-]<br>Sorbitol dehydrogenase (L-idoitol 2-dehydrogenase);sorbitol dehydrogenase [-]                                                           |
| DPEP1_PIG   | both | MDP1_PIG;P22412;DHP-I                 | microsomal dipeptidase, dehydropeptidase-I, renal dipeptidase [-]                                                                                                                  |
| DPO3A_BACSU | both | DP3A_BACSU;O34623;DNA polymerase III  | DNA polymerase III [-]                                                                                                                                                             |
| DPO3_BACSU  | both | DPO3_BACSU;P13267;DNA polymerase IIIC | DNA polymerase III polC-type (PolIII);DNA polymerase III polC-type [-]                                                                                                             |
| DPOLA_HUMAN | both | DPOA_HUMAN;P09884;POLA                | DNA polymerase alpha catalytic subunit [-]                                                                                                                                         |
| DPOL_HCMVA  | both | DPOL_HCMVA;P08546;HCMV DNA polymerase | DNA polymerase;DNA-directed DNA polymerase [-]                                                                                                                                     |
| DPP2_HUMAN  | both | DPP2_HUMAN;Q9UHL4;DPP II              | Dipeptidyl-peptidase II precursor (DPP II) (Dipeptidyl aminopeptidase II) (Quiescent cell proline dipeptidase) (Dipeptidyl peptidase 7);dipeptidyl peptidase II [-]                |
| DPP4_HUMAN  | both | DPP4_HUMAN;P27487;DPP IV              | Dipeptidyl peptidase IV (DPP IV) (T-cell activation antigen CD26) (TP103) (Adenosine deaminase complexing protein-2) (ADABP);dipeptidyl peptidase IV [-]                           |
| DRD1_BOVIN  | both | DADR_BOVIN;Q95136;D1                  | D1A dopamine receptor [-]                                                                                                                                                          |
| DRD1_RAT    | both | P18901;DRD1_RAT;D1-like               | D(1A) dopamine receptor;D1A dopamine receptor [-]                                                                                                                                  |
| DRD2_HUMAN  | both | P14416;DRD2_HUMAN;D2A                 | D(2) dopamine receptor;dopamine D2 receptor [-]                                                                                                                                    |
| DRD2_RAT    | both | P61169;DRD2_RAT;D2-like               | D(2) dopamine receptor;dopamine D2 receptor [-]                                                                                                                                    |
| DRD3_HUMAN  | both | P35462;DRD3_HUMAN;D3                  | D(3) dopamine receptor;D3 dopamine receptor [-]                                                                                                                                    |
| DRD4_HUMAN  | both | P21917;DRD4_HUMAN;D4                  | D(4) dopamine receptor (D2C) dopamine receptor;D4 dopamine receptor [-]                                                                                                            |
| DRD5_HUMAN  | both | P21918;DRD5_HUMAN;D5                  | D(1B) dopamine receptor (D5) dopamine receptor (D1beta dopamine receptor);D5 dopamine receptor [-]                                                                                 |
| DRD5_RAT    | both | P25115;DRD5_RAT;D1B                   | D(1B) dopamine receptor (D5) dopamine receptor;D1B dopamine receptor [-]                                                                                                           |
| DRTS_PLAFK  | both | DRTS_PLAFK;P13922;DHFR-TS             | Bifunctional dihydrofolate reductase-thymidylate synthase (DHFR-TS) (Dihydrofolate reductase) (Thymidylate synthase);bifunctional dihydrofolate reductase-thymidylate synthase [-] |
| DUS3_HUMAN  | both | DUS3_HUMAN;P51452;PTP VHR             | Dual specificity protein phosphatase 3 (EC 3.1.3.16) (Dual specificity protein phosphatase VHR);dual specificity protein phosphatase VHR [-]                                       |
| DXR_ECOLI   | both | DXR_ECOLI;P45568;DXR                  | 1-deoxy-D-xylulose 5-phosphate reductoisomerase (DXP reductoisomerase) (1-deoxyxylulose-5-                                                                                         |

|             |      |                          |                                                                                                                                                                                                                                                                                   |
|-------------|------|--------------------------|-----------------------------------------------------------------------------------------------------------------------------------------------------------------------------------------------------------------------------------------------------------------------------------|
| DYR_MOUSE   | both | DYR_MOUSE;P00375;PKC     | phosphate reductoisomerase);1-deoxy-D-xylulose 5-phosphate reductoisomerase [-]                                                                                                                                                                                                   |
| EAA3_RAT    | both | EAA3_RAT;P51907;EAAT3    | Dihydrofolate reductase;protein kinase C, alpha type [-]                                                                                                                                                                                                                          |
| EBP_CAVPO   | both | EBP_CAVPO;Q60490;EBP     | Excitatory amino acid transporter 3 (Sodium-dependent glutamate/aspartate transporter 3) (Excitatory amino-acid carrier 1);excitatory amino acid transporter 3, sodium-dependent glutamate/aspartate transporter 3 [-]                                                            |
| ECE1_HUMAN  | both | ECE1_HUMAN;P42892;ECE    | 3-beta-hydroxysteroid-delta(8),delta(7)-isomerase (Cholestenol delta-isomerase) (Delta8-delta7 sterol isomerase) (D8-D7 sterol isomerase) (Emopamil-binding protein);emopamil binding protein, 3-beta-hydroxysteroid-delta(8),delta(7)-isomerase, cholestenol delta-isomerase [-] |
| ECE1_RAT    | both | ECE1_RAT;P42893;ECE-1    | Endothelin-converting enzyme 1 (ECE-1);endothelin-converting enzyme 1 [-]                                                                                                                                                                                                         |
| EDNRA_PIG   | both | Q29010;EDNRA_PIG;ET-A    | Endothelin-converting enzyme 1 (ECE-1);endothelin-converting enzyme 1 [-]                                                                                                                                                                                                         |
| EDNRB_RAT   | both | P21451;EDNRB_RAT;ET-B    | Endothelin-1 receptor precursor (Endothelin A receptor) (ET-A);endothelin type A receptor [-]                                                                                                                                                                                     |
| ELNE_HUMAN  | both | ELNE_HUMAN;P08246;HLE    | Endothelin B receptor precursor (ET-B) (Endothelin receptor Non-selective type);endothelin type B receptor [-]                                                                                                                                                                    |
| ERBB2_HUMAN | both | ERB2_HUMAN;P04626;erbB2  | Leukocyte elastase precursor (Neutrophil elastase) (PMN elastase) (Bone marrow serine protease) (Medullasin);neutrophil elastase, leukocyte elastase [-]                                                                                                                          |
| ERBB4_HUMAN | both | ERBB4_HUMAN;Q15303;erbB4 | tyrosine kinase-type cell surface receptor HER2 [-]                                                                                                                                                                                                                               |
| ERG2_YEAST  | both | ERG2_YEAST;P32352;ERG2   | Receptor tyrosine-protein kinase erbB-4 precursor (p180erbB4) (Tyrosine kinase-type cell surface receptor HER4);epidermal growth factor receptor-4 [-]                                                                                                                            |
| ERG7_RAT    | both | ERG7_RAT;P48450;OSCase   | C-8 sterol isomerase (Delta-8--delta-7 sterol isomerase);3-beta-hydroxysteroid-delta(8),delta(7)-isomerase, cholestenol delta-isomerase [-]                                                                                                                                       |
|             |      |                          | Lanosterol synthase (Oxidosqualene--lanosterol cyclase) (2,3-epoxysqualene--lanosterol cyclase) (OSC);lanosterol synthase, 2,3-oxidosqualene lanosterolcyclase [-]                                                                                                                |

|             |      |                                     |                                                                                                                                                                                                                                                                                        |
|-------------|------|-------------------------------------|----------------------------------------------------------------------------------------------------------------------------------------------------------------------------------------------------------------------------------------------------------------------------------------|
| ERR3_HUMAN  | both | P62508;ERR3_HUMAN;ERRgamma          | Estrogen-related receptor gamma (Estrogen receptor related protein 3) (ERR gamma-2);estrogen-related receptor, gamma                                                                                                                                                                   |
| ESR1_HUMAN  | both | P03372;ESR1_HUMAN;probable ER       | Estrogen receptor (ER) (Estradiol receptor) (ER-alpha);estrogen receptor [-]                                                                                                                                                                                                           |
| ESR2_HUMAN  | both | ESR2_HUMAN;Q92731;ERbeta            | Estrogen receptor beta (ER-beta);estrogen receptor beta [-]                                                                                                                                                                                                                            |
| EST1_RABIT  | both | EST1_RABIT;P12337;CE                | Liver carboxylesterase 1 precursor (Acyl coenzyme A:cholesterol acyltransferase);liver carboxylesterase 1, acyl coenzyme A:cholesterol acyltransferase [-]                                                                                                                             |
| F13A_HUMAN  | both | F13A_HUMAN;P00488;fXIIIa            | Coagulation factor XIII A chain precursor (Coagulation factor XIIIa) (Protein-glutamine gamma-glutamyltransferase A chain) (Transglutaminase A chain);coagulation factor XIIIa, protein-glutamine gamma-glutamyltransferase [-]                                                        |
| F16P1_HUMAN | both | F16P_HUMAN;P09467;F16BPase          | fructose-1,6-bisphosphatase [-]                                                                                                                                                                                                                                                        |
| FA10_HUMAN  | both | FA10_HUMAN;P00742;fXa               | Coagulation factor X precursor (Stuart factor) (Stuart-Prower factor);coagulation factor Xa [-]                                                                                                                                                                                        |
| FA7_HUMAN   | both | FA7_HUMAN;P08709;fVIIa              | Coagulation factor VII precursor (Serum prothrombin conversion accelerator) (SPCA) (Proconvertin) (Eptacog alfa);coagulation factor VII [-]                                                                                                                                            |
| FAAH1_HUMAN | both | FAAH_HUMAN;O00519;FAAH              | fatty-acid amide hydrolase, oleamide hydrolase, anandamide amidohydrolase [-]                                                                                                                                                                                                          |
| FAS_HUMAN   | both | FAS_HUMAN;P49327;FAS                | Fatty acid synthase () ([Acyl-carrier-protein] S-acetyltransferase) () ([Acyl-carrier-protein] S-malonyltransferase) () (3-oxoacyl-[acyl-carrier-protein] synthase) () (3-oxoacyl-[acyl-carrier-protein] reductase) () (3-hydroxypalmitoyl-[acyl-carrier-pr...;fatty acid synthase [-] |
| FCER2_HUMAN | both | FCE2_HUMAN;P06734;FcERI             | IgE FC receptor, alpha-subunit, high affinity immunoglobulin epsilon receptor alpha-subunit [-]                                                                                                                                                                                        |
| FDFT_RAT    | both | FDFT_RAT;Q02769;squalene synthetase | Farnesyl-diphosphate farnesyltransferase (Squalene synthetase) (SQS) (SS) (FPP:FPP farnesyltransferase);squalene synthetase, farnesyl-diphosphate farnesyltransferase [-]                                                                                                              |
| FGF1_HUMAN  | both | FGF1_HUMAN;P05230;FGF1              | Heparin-binding growth factor 1 precursor (HBGF-1) (Acidic fibroblast growth factor) (aFGF) (Beta-endothelial cell growth factor) (ECGF-beta);heparin-                                                                                                                                 |

|             |      |                             |                                                                                                                                                                                                                                                                                                                                                  |
|-------------|------|-----------------------------|--------------------------------------------------------------------------------------------------------------------------------------------------------------------------------------------------------------------------------------------------------------------------------------------------------------------------------------------------|
| FGF2_HUMAN  | both | FGF2_HUMAN;P09038;FGF2      | binding growth factor 1, acidic fibroblast growth factor<br>Heparin-binding growth factor 2 precursor (HBGF-2) (Basic fibroblast growth factor) (BFGF) (Prostatropin);heparin-binding growth factor 2, basic fibroblast growth factor, prostatropin                                                                                              |
| FGFR1_HUMAN | both | FGR1_HUMAN;P11362;FGFR-1    | fibroblast growth factor receptor 1 [-]                                                                                                                                                                                                                                                                                                          |
| FGFR2_HUMAN | both | FGFR2_HUMAN;P21802;FGFR-2   | Fibroblast growth factor receptor 2 precursor (FGFR-2) (Keratinocyte growth factor receptor 2);fibroblast growth factor receptor 2 [-]                                                                                                                                                                                                           |
| FGR_HUMAN   | both | FGR_HUMAN;P09769;c-Fgr      | Proto-oncogene tyrosine-protein kinase FGR (P55-FGR) (C-FGR);proto-oncogene tyrosine-protein kinase Fgr [-]                                                                                                                                                                                                                                      |
| FLT3_HUMAN  | both | FLT3_HUMAN;P36888;Flt-3     | FL cytokine receptor precursor (Tyrosine-protein kinase receptor FLT3) (Stem cell tyrosine kinase 1) (STK-1) (CD135 antigen);tyrosine-protein kinase receptor FLT3 [-]                                                                                                                                                                           |
| FNTA_HUMAN  | both | PFTA_HUMAN;P49354;FTase     | protein farnesyltransferase type I alpha subunit [-]                                                                                                                                                                                                                                                                                             |
| FOLC_HUMAN  | both | FOLC_HUMAN;Q05932;FPGS      | Folylpolyglutamate synthase, mitochondrial precursor (Folylpoly-gamma-glutamate synthetase) (FPGS) (Tetrahydrofolylpolyglutamate synthase);folylpoly-gamma-glutamate synthetase [-]                                                                                                                                                              |
| FOLH1_HUMAN | both | FOLH1_HUMAN;Q04609;GCP II   | Glutamate carboxypeptidase II (Membrane glutamate carboxypeptidase) (mGCP) (N-acetylated-alpha-linked acidic dipeptidase I) (NAALADase I) (Pteroylpoly-gamma-glutamate carboxypeptidase) (Folylpoly-gamma-glutamate carboxypeptidase) (FGCP) (Folate hydrol...;glutamate carboxypeptidase II, N-acetylated-alpha-linked acidic dipeptidase I [-] |
| FPR1_HUMAN  | both | P21462;FPR1_HUMAN;FPR       | fMet-Leu-Phe receptor (fMLP receptor) (N-formyl peptide receptor) (FPR) (N-formylpeptide chemoattractant receptor);formyl peptide receptor, N-formyl-Met-Leu-Phe receptor [-]                                                                                                                                                                    |
| GABR1_RAT   | both | Q9Z0U4;GABR1_RAT;GABA-B     | Gamma-aminobutyric acid type B receptor, subunit 1 precursor (GABA-B receptor 1) (GABA-B-R1) (Gb1);gamma-aminobutyric acid type B receptor [-]                                                                                                                                                                                                   |
| GBRA1_RAT   | both | GAA1_MOUSE;P18504;GABA-A    | gamma-aminobutyric acid receptor [-]                                                                                                                                                                                                                                                                                                             |
| GBRA2_RAT   | both | GBRA2_RAT;P23576;GABA-A/PCT | Gamma-aminobutyric-acid receptor alpha-2 subunit precursor (GABA(A) receptor);gamma-aminobutyric                                                                                                                                                                                                                                                 |

|             |      |                              |                                                                                                                                                                                                                                                                        |
|-------------|------|------------------------------|------------------------------------------------------------------------------------------------------------------------------------------------------------------------------------------------------------------------------------------------------------------------|
| GBRR1_HUMAN | both | GAR1_HUMAN;P24046;GABA-C     | acid receptor, picrotoxin site [-]                                                                                                                                                                                                                                     |
| GCR_HUMAN   | both | GCR_HUMAN;P04150;GR          | gamma-aminobutyric acid receptor [-]<br>Glucocorticoid receptor (GR);glucocorticoid receptor [-]                                                                                                                                                                       |
| GHSR_HUMAN  | both | Q92847;GHSR_HUMAN;GHSR1a     | Growth hormone secretagogue receptor type 1 (GHS-R) (GH-releasing peptide receptor) (GHRP) (Ghrelin receptor);growth hormone secretagogue receptor, growth hormone-releasing peptide receptor [-]                                                                      |
| GLRA1_RAT   | both | GLRA1_RAT;P07727;GlyR        | Glycine receptor alpha-1 chain precursor (Glycine receptor 48 kDa subunit) (Strychnine binding subunit);glycine receptor alpha-1 chain, strychnine binding subunit                                                                                                     |
| GLR_HUMAN   | both | P47871;GLR_HUMAN;glucagon R  | Glucagon receptor precursor (GL-R);glucagon receptor [-]                                                                                                                                                                                                               |
| GNRHR_HUMAN | both | P30968;GNRHR_HUMAN;GnRHR     | Gonadotropin-releasing hormone receptor (GnRH receptor) (GnRH-R);gonadotropin releasing hormone receptor [-]                                                                                                                                                           |
| GPR44_HUMAN | both | Q9Y5Y4;GPR44_HUMAN;CRTH2     | Putative G-protein coupled receptor 44 (Chemoattractant receptor-homologous molecule expressed on Th2 cells);chemoattractant receptor-homologous molecule expressed on Th2 cells [-]                                                                                   |
| GRAB_HUMAN  | both | GRAB_HUMAN;P10144;granzyme B | Granzyme B precursor (T-cell serine protease 1-3E) (Cytotoxic T-lymphocyte proteinase 2) (Lymphocyte protease) (SECT) (Granzyme 2) (Cathepsin G-like 1) (CTSG1) (CTLA-1) (Fragmentin 2) (Human lymphocyte protein) (HLP) (C11);cytotoxic T-lymphocyte proteinase 2 [-] |
| GRIA1_RAT   | both | GLR1_RAT;P19490;AMPA         | glutamate receptor ionotropic, AMPA 1 [-]                                                                                                                                                                                                                              |
| GRIK1_HUMAN | both | GRIK1_HUMAN;P39086;GluR5/6   | Glutamate receptor, ionotropic kainate 1 precursor (Glutamate receptor 5) (GluR-5) (GluR5) (Excitatory amino acid receptor 3) (EAA3);glutamate receptor, ionotropic kainate 1, glutamate receptor 5, excitatory amino acid receptor 3 [-]                              |
| GRM3_HUMAN  | both | Q14832;MGR3_HUMAN;mGluR3     | metabotropic glutamate receptor 3 [-]                                                                                                                                                                                                                                  |
| GRM4_RAT    | both | P31423;MGR4_RAT;mGluR4a      | metabotropic glutamate receptor 4 [+]                                                                                                                                                                                                                                  |
| GRM5_RAT    | both | P31424;MGR5_RAT;mGluR5a      | metabotropic glutamate receptor 5a [-]                                                                                                                                                                                                                                 |
| GRM6_RAT    | both | P35349;MGR6_RAT;mGluR6       | metabotropic glutamate receptor 6 [-]                                                                                                                                                                                                                                  |
| GRM8_HUMAN  | both | O00222;MGR8_HUMAN;mGluR8     | metabotropic glutamate receptor 8 [-]                                                                                                                                                                                                                                  |
| GRPR_RAT    | both | P52500;GRPR_RAT;GRP-R        | Gastrin-releasing peptide receptor (GRP-R) (GRP-                                                                                                                                                                                                                       |

|             |      |                              |                                                                                                                                                             |
|-------------|------|------------------------------|-------------------------------------------------------------------------------------------------------------------------------------------------------------|
| GSHR_HUMAN  | both | GSHR_HUMAN;P00390;GRase      | preferring bombesin receptor);GRP-preffering bombesin receptor [-]<br>Glutathione reductase, mitochondrial precursor (GR) (GRase);glutathione reductase [-] |
| GSK3A_HUMAN | both | KG3A_HUMAN;P49840;GSK-3      | glycogen synthase kinase-3 alpha [-]                                                                                                                        |
| GSP_CRIFA   | both | GSP_CRIFA;P90518;GSpS        | Glutathionylspermidine synthase;glutathionylspermidine synthase [-]                                                                                         |
| GYRA_ECOLI  | both | GYRA_ECOLI;P09097;DNA gyrase | DNA gyrase subunit A;DNA gyrase subunit A [-]                                                                                                               |
| HCK_HUMAN   | both | HCK_HUMAN;P08631;Hck         | Tyrosine-protein kinase HCK (p59-HCK/p60-HCK) (Hemopoietic cell kinase);tyrosine-protein kinase Hck [-]                                                     |
| HDAC1_HUMAN | both | HDA1_HUMAN;Q13547;HDA        | histone deacetylase 1 [-]                                                                                                                                   |
| HDAC1_MOUSE | both | HDA1_MOUSE;O09106;HDA1       | histone deacetylase 1 [-]                                                                                                                                   |
| HDAC4_HUMAN | both | HDAC4_HUMAN;P56524;HDA4      | Histone deacetylase 4 (HD4);histone deacetylase 4 [-]                                                                                                       |
| HDAC6_HUMAN | both | HDAC6_HUMAN;Q9UBN7;HDA6      | Histone deacetylase 6 (HD6);histone deacetylase 6 [-]                                                                                                       |
| HDAC8_HUMAN | both | HDAC8_HUMAN;Q9BY41;HDA8      | Histone deacetylase 8 (HD8) (CDA07);histone deacetylase 8 [-]                                                                                               |
| HMDH_RAT    | both | HMDH_RAT;P51639;HMG-CoA Rase | 3-hydroxy-3-methylglutaryl-coenzyme A reductase (HMG-CoA reductase);3-hydroxy-3-methylglutaryl-coenzyme A reductase [-]                                     |
| HNMT_RAT    | both | HMT_RAT;Q01984;HMT           | histamine N-methyltransferase [-]                                                                                                                           |
| HPPD_PIG    | both | HPPD_PIG;Q02110;4-HPPDase    | 4-hydroxyphenylpyruvate dioxygenase (4HPPD) (HPD) (HPPDase);4-hydroxyphenylpyruvate dioxygenase [-]                                                         |
| HRH1_HUMAN  | both | P35367;HRH1_HUMAN;H1         | Histamine H1 receptor;histamine H1 receptor [-]                                                                                                             |
| HRH2_HUMAN  | both | P25021;HRH2_HUMAN;H2         | Histamine H2 receptor (H2R) (Gastric receptor I);histamine H2 receptor [-]                                                                                  |
| HRH3_CAVPO  | both | Q9JI35;HRH3_CAVPO;H3         | Histamine H3 receptor (HH3R);histamine H3 receptor [-]                                                                                                      |
| HRH4_HUMAN  | both | Q9H3N8;HRH4_HUMAN;H4         | Histamine H4 receptor (HH4R) (GPRv53) (G protein-coupled receptor 105) (GPCR105) (SP9144) (AXOR35);histamine H4 receptor [-]                                |
| HYES_MOUSE  | both | HYES_MOUSE;P34914;sEH        | Soluble epoxide hydrolase (SEH) (Epoxide hydratase) (Cytosolic epoxide hydrolase) (CEH);soluble epoxide hydrolase, cytosolic epoxide hydrolase [-]          |
| I23O_HUMAN  | both | I23O_HUMAN;P14902;IDO        | Indoleamine 2,3-dioxygenase (EC 1.13.11.52) (IDO) (Indoleamine-pyrrole 2,3-                                                                                 |



|             |      |                                                     |                                                                                                                                                                                                                                                   |
|-------------|------|-----------------------------------------------------|---------------------------------------------------------------------------------------------------------------------------------------------------------------------------------------------------------------------------------------------------|
| IBP3_HUMAN  | both | IBP3_HUMAN;P17936;IGFBP-3                           | dioxygenase).;indoleamine 2,3-dioxygenase [-]<br>Insulin-like growth factor binding protein 3 precursor (IGFBP-3) (IBP-3) (IGF-binding protein 3);insulin growth factor binding protein 3 [-]                                                     |
| ICAM1_HUMAN | both | ICA1_HUMAN;P05362;ICAM-1                            | intercellular adhesion molecule-1, CD54 antigen [-]                                                                                                                                                                                               |
| IKKB_HUMAN  | both | IKKB_HUMAN;O14920;IKK                               | Inhibitor of nuclear factor kappa B kinase beta subunit (I-kappa-B-kinase beta) (IkbKB) (IKK-beta) (IKK-B) (I-kappa-B kinase 2) (IKK2) (Nuclear factor NF-kappa-B inhibitor kinase beta) (NFKB1KB);inhibitor of nuclear factor kappa B kinase [-] |
| IMDH1_HUMAN | both | IMD1_HUMAN;P20839;IMPDH I                           | inosine-5'-monophosphate dehydrogenase 1 [-]                                                                                                                                                                                                      |
| IMDH2_HUMAN | both | IMD2_HUMAN;P12268;IMPDH II                          | inosine-5'-monophosphate dehydrogenase 2 [-]                                                                                                                                                                                                      |
| IMPA1_HUMAN | both | MYOP_HUMAN;P29218;IMPase                            | myo-inositol monophosphatase [-]                                                                                                                                                                                                                  |
| ITA2B_HUMAN | both | ITAB_HUMAN;P08514;ITB3_HUMAN;P05106;alpha-IIb-beta3 | Integrin beta-3 precursor (Platelet membrane glycoprotein IIIa) (GPIIIa) (CD61 antigen);alpha-IIb-beta3 integrin [-]                                                                                                                              |
| ITA4_HUMAN  | both | ITA4_HUMAN;P13612;ITB7_HUMAN;P26010;a4b7            | Integrin alpha-4 precursor (Integrin alpha-IV) (VLA-4) (CD49d);Integrin beta-7 precursor;alpha4beta7 integrin, MAdCAM-1 receptor [-]                                                                                                              |
| ITA5_HUMAN  | both | ITA5_HUMAN;P08648;a5b1                              | Integrin alpha-5 precursor (Fibronectin receptor alpha subunit) (Integrin alpha-F) (VLA-5) (CD49e);fibronectin receptor, alpha-5/beta-1 integrin, VLA-5, CD49e [-]                                                                                |
| ITAV_HUMAN  | both | ITAV_HUMAN;P06756;ITB3_HUMAN;P05106;alpha-V-beta3   | Integrin alpha-V precursor (Vitronectin receptor alpha subunit) (CD51 antigen);Integrin beta-3 precursor (Platelet membrane glycoprotein IIIa) (GPIIIa) (CD61 antigen);alpha-V-beta3 integrin, vitronectin receptor [-]                           |
| ITB1_HUMAN  | both | ITA4_HUMAN;P13612;ITB1_HUMAN;P05556;a4b1/VLA-4      | Integrin alpha-4 precursor (Integrin alpha-IV) (VLA-4) (CD49d);Integrin beta-1 precursor (Fibronectin receptor beta subunit) (CD29 antigen) (Integrin VLA-4 beta subunit);fibronectin receptor, VCAM-1 receptor, very late antigen-4 [-]          |
| ITB3_HUMAN  | both | ITAB_HUMAN;P08514;ITB3_HUMAN;P05106;alpha-IIb-beta3 | Integrin beta-3 precursor (Platelet membrane glycoprotein IIIa) (GPIIIa) (CD61 antigen);alpha-IIb-beta3 integrin [-]                                                                                                                              |
| ITB5_HUMAN  | both | ITAV_HUMAN;P06756;ITB5_HUMAN;P18084;alpha-V-beta5   | Integrin alpha-V precursor (Vitronectin receptor alpha subunit) (CD51 antigen);Integrin beta-5 precursor;alpha-V-beta3 integrin, vitronectin                                                                                                      |

|             |      |                                                   |                                                                                                                                                                                                                              |
|-------------|------|---------------------------------------------------|------------------------------------------------------------------------------------------------------------------------------------------------------------------------------------------------------------------------------|
| ITB6_HUMAN  | both | ITAV_HUMAN;P06756;ITB6_HUMAN;P18564;alpha-V-beta6 | receptor, alpha-V-beta5 integrin [-]<br>Integrin alpha-V precursor (Vitronectin receptor alpha subunit) (CD51 antigen);Integrin beta-6 precursor;fibronectin receptor, alpha-V-beta6 integrin [-]                            |
| ITB7_HUMAN  | both | ITA4_HUMAN;P13612;ITB7_HUMAN;P26010;a4b7          | Integrin alpha-4 precursor (Integrin alpha-IV) (VLA-4) (CD49d);Integrin beta-7 precursor;alpha4beta7 integrin, MAdCAM-1 receptor [-]                                                                                         |
| JUN_HUMAN   | both | AP1_HUMAN;P05412;AP-1                             | transcription factor AP-1, activator protein-1, proto-oncogene c-Jun, p39 [-]                                                                                                                                                |
| KAPCA_BOVIN | both | KAPA_BOVIN;P00517;PKA                             | cAMP-dependent PKA [-]                                                                                                                                                                                                       |
| KINA_BACSU  | both | KINA_BACSU;P16497;kinA                            | Sporulation kinase A (Stage II sporulation protein J);sporulation kinase A [-]                                                                                                                                               |
| KITM_HUMAN  | both | KITM_HUMAN;O00142;TK2                             | Thymidine kinase 2, mitochondrial precursor (Mt-TK);thymidine kinase 2, mitochondrial [-]                                                                                                                                    |
| KLK3_HUMAN  | both | KLK3_HUMAN;P07288;PSA                             | Prostate specific antigen precursor (PSA) (Gamma-seminoprotein) (Kallikrein 3) (Semenogelase) (Seminin) (P-30 antigen);prostate specific antigen, kallikrein 3, semenogelase, gamma-seminoprotein, seminin, P-30 antigen [-] |
| KPCA_HUMAN  | both | KPCA_HUMAN;P17252;PKC-alpha                       | Protein kinase C, alpha type (PKC-alpha) (PKC-A);protein kinase C, alpha type [-]                                                                                                                                            |
| KPCB_HUMAN  | both | KPCB_HUMAN;P05771;PKC-beta-II                     | protein kinase C, beta isoform 2 [Homo sapiens];protein kinase C, beta type [-]                                                                                                                                              |
| KPCD3_HUMAN | both | KPCN_HUMAN;O94806;PKC-nuC1B                       | protein kinase C, nu type [-]                                                                                                                                                                                                |
| KPCD_HUMAN  | both | KPCD_HUMAN;Q05655;PKC-delta                       | Protein kinase C, delta type (nPKC-delta);protein kinase C, delta type [-]                                                                                                                                                   |
| KPCE_HUMAN  | both | KPCE_HUMAN;Q02156;PKC-epsilonC1B                  | Protein kinase C, epsilon type (nPKC-epsilon);protein kinase C, epsilon type [-]                                                                                                                                             |
| KPCG_HUMAN  | both | KPCG_HUMAN;P05129;PKC-gamma                       | Protein kinase C, gamma type (PKC-gamma);protein kinase C, gamma type [-]                                                                                                                                                    |
| KPCL_HUMAN  | both | KPCL_HUMAN;P24723;PKC-eta                         | Protein kinase C, eta type (nPKC-eta) (PKC-L);protein kinase C, eta type [-]                                                                                                                                                 |
| KPCT_HUMAN  | both | KPCT_HUMAN;Q04759;PKC-theta                       | Protein kinase C, theta type (nPKC-theta);protein kinase C, theta type [-]                                                                                                                                                   |
| KPCZ_HUMAN  | both | KPCZ_HUMAN;Q05513;PKC-zeta                        | Protein kinase C, zeta type (nPKC-zeta);protein kinase C, zeta type [-]                                                                                                                                                      |
| KS6A5_HUMAN | both | K6A5_HUMAN;O75582;MSK1                            | nuclear mitogen-and stress-activated protein kinase-1 [-]                                                                                                                                                                    |
| KS6B1_HUMAN | both | K6B1_HUMAN;P23443;S6K1                            | 70 kDa ribosomal protein S6 kinase 1, ribosomal                                                                                                                                                                              |

|             |      |                            |                                                                                                                                                                                |
|-------------|------|----------------------------|--------------------------------------------------------------------------------------------------------------------------------------------------------------------------------|
| KSYK_HUMAN  | both | KSYK_HUMAN;P43405;Syk      | protein S6 kinase 1 [-]<br>Tyrosine-protein kinase SYK (Spleen tyrosine kinase);spleen tyrosine-protein kinase [-]                                                             |
| KTHY_HUMAN  | both | KTHY_HUMAN;P23919;TMPK     | Thymidylate kinase (dTMP kinase);thymidylate kinase, thymidine monophosphate kinase [-]                                                                                        |
| LDHA_HUMAN  | both | LDHA_HUMAN;P00338;LDH-A    | L-lactate dehydrogenase A chain (LDH-A) (LDH muscle subunit) (LDH-M);L-lactate dehydrogenase A chain [-]                                                                       |
| LDHB_HUMAN  | both | LDHB_HUMAN;P07195;LDH-B    | L-lactate dehydrogenase B chain (LDH-B) (LDH heart subunit) (LDH-H);L-lactate dehydrogenase B chain [-]                                                                        |
| LEF_BACAN   | both | LEF_BACAN;P15917;LF        | Lethal factor precursor (EC 3.4.24.83) (LF) (Anthrax lethal toxin endopeptidase component).;lethal factor, anthrax lethal toxin endopeptidase component [-]                    |
| LIPS_HUMAN  | both | Q6NSL7;HSL                 | hormone-sensitive lipase [-]                                                                                                                                                   |
| LOX1_SOYBN  | both | LOX1_SOYBN;P08170;SLO      | Seed lipoxygenase-1 (L-1);soybean lipoxygenase-1 [-]                                                                                                                           |
| LOX5_HUMAN  | both | LOX5_HUMAN;P09917;5-LOX    | Arachidonate 5-lipoxygenase (5-lipoxygenase) (5-LO);arachidonate 5-lipoxygenase [-]                                                                                            |
| LPAR1_HUMAN | both | Q92633;EDG2_HUMAN;LPA      | lysophosphatidic acid receptor [-]                                                                                                                                             |
| LPAR1_RAT   | both | P61794;EDG2_RAT;LPA-1      | lysophosphatidic acid receptor 1 [-]                                                                                                                                           |
| LPAR2_HUMAN | both | Q9HBW0;EDG4_HUMAN;LPA-2    | lysophosphatidic acid receptor Edg-4, LPA receptor 2 [-]                                                                                                                       |
| LPAR3_HUMAN | both | Q9UBY5;EDG7_HUMAN;LPA-3    | lysophosphatidic acid receptor Edg-7, LPA receptor 3 [-]                                                                                                                       |
| LPXC_PSEAE  | both | LPXC_PSEAE;P47205;LpxC DAC | UDP-3-O-[3-hydroxymyristoyl] N-acetylglucosamine deacetylase (UDP-3-O-acyl-GlcNAc deacetylase) (envA protein);UDP-3-O-[3-hydroxymyristoyl] N-acetylglucosamine deacetylase [-] |
| LT4R1_HUMAN | both | Q15722;LT4R1_HUMAN;LTB4-R  | Leukotriene B4 receptor 1 (LTB4-R 1) (P2Y purinoceptor 7) (P2Y7) (Chemoattractant receptor-like 1);leukotriene B4 receptor 1 [-]                                               |
| LX15B_RAT   | both | Q8K4F2;15-LOX              | arachidonate 15-lipoxygenase [-]                                                                                                                                               |
| M3K10_HUMAN | both | M3K10_HUMAN;Q02779;MLK-2   | Mitogen-activated protein kinase kinase kinase 10 (Mixed lineage kinase 2) (Protein kinase MST);mitogen-activated protein kinase kinase 11 [-]                                 |
| M3K1_HUMAN  | both | M3K1_HUMAN;Q13233;Mekk1    | Mitogen-activated protein kinase kinase kinase 1 (MAPK/ERK kinase kinase 1) (MEK kinase 1)                                                                                     |

|             |      |                             |                                                                                                                                                                                                                                            |
|-------------|------|-----------------------------|--------------------------------------------------------------------------------------------------------------------------------------------------------------------------------------------------------------------------------------------|
| M3K9_HUMAN  | both | M3K9_HUMAN;P80192;MLK-1     | (MEKK 1);mitogen-activated protein kinase kinase 1 [-]<br>mitogen-activated protein kinase kinase kinase 9 [Homo sapiens];mitogen-activated protein kinase kinase kinase 9, mixed lineage kinase 1 [-]                                     |
| MAPK2_HUMAN | both | MKK2_HUMAN;P49137;MAPKAPK2  | MAPK-activated protein kinase 2 [-]                                                                                                                                                                                                        |
| MAPK5_HUMAN | both | MKK5_HUMAN;Q8IW41;PRAK      | MAP kinase-activated protein kinase 5, p38-regulated/activated protein kinase [-]                                                                                                                                                          |
| MC3R_HUMAN  | both | P41968;MC3R_HUMAN;MC3R      | Melanocortin-3 receptor (MC3-R);melanocortin-3 receptor [-]                                                                                                                                                                                |
| MC4R_HUMAN  | both | P32245;MC4R_HUMAN;MC4R      | Melanocortin-4 receptor (MC4-R);melanocortin-4 receptor [-]                                                                                                                                                                                |
| MC5R_HUMAN  | both | P33032;MC5R_HUMAN;MC5R      | Melanocortin-5 receptor (MC5-R) (MC-2);melanocortin-5 receptor [-]                                                                                                                                                                         |
| MCHR2_HUMAN | both | MCHR2_HUMAN;Q969V1;MCHR2    | Melanin-concentrating hormone receptor 2 (MCH receptor 2) (MCHR-2) (MCH-R2) (MCH2R) (MCH-2R) (MCH2) (G-protein coupled receptor 145) (GPRv17);melanin-concentrating hormone receptor 2 [-]                                                 |
| MCR_HUMAN   | both | MCR_HUMAN;P08235;MR         | Mineralocorticoid receptor (MR);mineralocorticoid receptor [-]                                                                                                                                                                             |
| MDR1_HUMAN  | both | MDR1_HUMAN;P08183;PGP MDR1  | Multidrug resistance protein 1 (P-glycoprotein 1) (CD243 antigen);P-glycoprotein 1, multi-drug resistance protein 1 [-]                                                                                                                    |
| MDR1_MOUSE  | both | MDR1_MOUSE;P06795;PGP MDR1b | Multidrug resistance protein 1 (P-glycoprotein 1);P-glycoprotein 1, multi-drug resistance protein 1 [-]                                                                                                                                    |
| MDR3_MOUSE  | both | MDR3_MOUSE;P21447;PGP MDR1a | Multidrug resistance protein 3 (P-glycoprotein 3) (MDR1A);P-glycoprotein 3, multi-drug resistance protein 3 [-]                                                                                                                            |
| MGMT_HUMAN  | both | MGMT_HUMAN;P16455;AGAT      | Methylated-DNA--protein-cysteine methyltransferase (6-O-methylguanine-DNA methyltransferase) (MGMT) (O-6-methylguanine-DNA-alkyltransferase);methylated-DNA-protein-cysteine methyltransferase, O6-methylguanine-DNA methyltransferase [-] |
| MIF_HUMAN   | both | MIF_HUMAN;P14174;MIF        | Macrophage migration inhibitory factor (MIF) (Phenylpyruvate tautomerase) (Glycosylation-inhibiting factor) (GIF);macrophage migration inhibitory factor, glycosylation-inhibiting factor [-]                                              |
| MK01_HUMAN  | both | MK01_HUMAN;P28482;Erk-2     | Mitogen-activated protein kinase 1 (Extracellular                                                                                                                                                                                          |

|             |      |                                         |                                                                                                                                                                                                                                                                                                                           |
|-------------|------|-----------------------------------------|---------------------------------------------------------------------------------------------------------------------------------------------------------------------------------------------------------------------------------------------------------------------------------------------------------------------------|
| MK08_HUMAN  | both | MK08_HUMAN;P45983;Jnk1                  | signal-regulated kinase 2) (ERK-2) (Mitogen-activated protein kinase 2) (MAP kinase 2) (MAPK 2) (p42-MAPK) (ERT1);extracellular signal-regulated kinase 2, mitogen-activated protein kinase 1 [-]                                                                                                                         |
| MK09_HUMAN  | both | MK09_HUMAN;P45984;Jnk2                  | Mitogen-activated protein kinase 8 (Stress-activated protein kinase JNK1) (c-Jun N-terminal kinase 1) (JNK-46);stress-activated protein kinase JNK1, mitogen-activated protein kinase 8 [-]                                                                                                                               |
| MK10_HUMAN  | both | MK10_HUMAN;P53779;Jnk3                  | Mitogen-activated protein kinase 9 (Stress-activated protein kinase JNK2) (c-Jun N-terminal kinase 2) (JNK-55);stress-activated protein kinase JNK2, mitogen-activated protein kinase 9 [-]                                                                                                                               |
| MK14_HUMAN  | both | MK14_HUMAN;Q16539;MAPK p38a             | Mitogen-activated protein kinase 10 (Stress-activated protein kinase JNK3) (c-Jun N-terminal kinase 3) (MAP kinase p49 3F12);stress-activated protein kinase JNK3 [-]                                                                                                                                                     |
| MMP11_MOUSE | both | MM11_MOUSE;Q02853;MMP-11                | Mitogen-activated protein kinase 14 (Mitogen-activated protein kinase p38alpha) (MAP kinase p38alpha) (Cytokine suppressive anti-inflammatory drug binding protein) (CSAID binding protein) (CSBP) (MAX-interacting protein 2) (MAP kinase MXI2) (SAPK2A);cytokine suppressive anti-inflammatory drug binding protein [-] |
| MMP12_HUMAN | both | MM12_HUMAN;P39900;MMP-12                | matrix metalloprotease-11, stromelysin 3 [-]                                                                                                                                                                                                                                                                              |
| MMP14_HUMAN | both | MM14_HUMAN;P50281;MMP-14E               | macrophage elastase, matrix metalloproteinase-12 [-]                                                                                                                                                                                                                                                                      |
| MMP15_HUMAN | both | MM15_HUMAN;P51511;MMP-15                | membrane-type-1 matrix metalloproteinase, matrix metalloprotease-14 [-]                                                                                                                                                                                                                                                   |
| MMP16_HUMAN | both | MM16_HUMAN;P51512;MMP-16                | matrix metalloproteinase-15, membrane-type matrix metalloproteinase 2 [-]                                                                                                                                                                                                                                                 |
| MMP1_HUMAN  | both | MM01_HUMAN;P03956;MMP-1                 | matrix metalloproteinase-16, membrane-type matrix metalloproteinase 3 [-]                                                                                                                                                                                                                                                 |
| MMP26_HUMAN | both | MMP26_HUMAN;Q9NRE1;Q9GZS2;Q9NR87;MMP-26 | fibroblast collagenase, matrix metalloprotease-1 [-]                                                                                                                                                                                                                                                                      |
| MMP2_HUMAN  | both | MM02_HUMAN;P08253;MMP-2                 | Matrix metalloproteinase-26 precursor (MMP-26) (Matrilysin-2) (Endometase);matrix metalloproteinase-26, matrilysin-2, endometase [-]                                                                                                                                                                                      |
| MMP3_HUMAN  | both | MM03_HUMAN;P08254;MMP-3                 | gelatinase A, matrix metalloprotease-2 [-]                                                                                                                                                                                                                                                                                |
| MMP7_HUMAN  | both | MM07_HUMAN;P09237;MMP-7                 | matrix metalloprotease-3, stromelysin 1 [-]                                                                                                                                                                                                                                                                               |
|             |      |                                         | matrilysin, matrix metalloprotease-7 [-]                                                                                                                                                                                                                                                                                  |

|             |      |                                        |                                                                                                                                                                                                                                              |
|-------------|------|----------------------------------------|----------------------------------------------------------------------------------------------------------------------------------------------------------------------------------------------------------------------------------------------|
| MMP8_HUMAN  | both | MM08_HUMAN;P22894;MMP-8                | matrix metalloprotease-8, neutrophil collagenase [-]                                                                                                                                                                                         |
| MMP9_HUMAN  | both | MM09_HUMAN;P14780;MMP-9                | gelatinase B, matrix metalloprotease-9 [-]                                                                                                                                                                                                   |
| MPIP1_HUMAN | both | MPI1_HUMAN;P30304;CDC25A               | dual specificity phosphatase Cdc25A [-]                                                                                                                                                                                                      |
| MRAY_ECOLI  | both | MRAY_ECOLI;P15876;MraY                 | Phospho-N-acetylmuramoyl-pentapeptide-transferase (UDP-MurNAc-pentapeptide phosphotransferase);phospho-N-acetylmuramoyl-pentapeptide-transferase [-]                                                                                         |
| MRP1_HUMAN  | both | MRP1_HUMAN;P33527;MRP1                 | Multidrug resistance-associated protein 1 (ATP-binding cassette, sub-family C, member 1);multidrug resistance-associated protein 1 [-]                                                                                                       |
| MSHR_HUMAN  | both | Q01726;MSHR_HUMAN;MC1R                 | Melanocyte stimulating hormone receptor (MSH-R) (Melanotropin receptor) (Melanocortin-1 receptor) (MC1-R);melanocortin-1 receptor [-]                                                                                                        |
| MTAP_MOUSE  | both | MTAP_MOUSE;Q9CQ65;MTAPase              | S-methyl-5-thioadenosine phosphorylase (5-methylthioadenosine phosphorylase) (MTA phosphorylase) (MTAPase);5'-methylthioadenosine phosphorylase, MTA phosphorylase [-]                                                                       |
| MTNN_ECOLI  | both | MTNN_ECOLI;P24247;MTA/SAH nucleosidase | MTA/SAH nucleosidase (P46) (5-methylthioadenosine nucleosidase) (S-adenosylhomocysteine nucleosidase);5'-methylthioadenosine nucleosidase/S-adenosylhomocysteine nucleosidase [-]                                                            |
| MTP_HUMAN   | both | MTP_HUMAN;P55157;MTP                   | Microsomal triglyceride transfer protein large subunit precursor;microsomal triglyceride transfer protein [-]                                                                                                                                |
| MTR1B_HUMAN | both | P49286;MTR1B_HUMAN;MT2                 | Melatonin receptor type 1B (Mel-1B-R) (Mel1b melatonin receptor);melatonin receptor type 1b [-]                                                                                                                                              |
| MURA_ECOLI  | both | MURA_ECOLI;P0A749;murA                 | UDP-N-acetylglucosamine 1-carboxyvinyltransferase (Enoylpyruvate transferase) (UDP-N-acetylglucosamine enolpyruvyl transferase) (EPT);UDP-N-acetylglucosamine 1-carboxyvinyltransferase, UDP-N-acetylglucosamine enolpyruvyl transferase [-] |
| MYLK_CHICK  | both | KMLS_CHICK;P11799;MLCKase              | myosin light chain kinase [-]                                                                                                                                                                                                                |
| NEP_HUMAN   | both | NEP_HUMAN;P08473;NEP                   | Nepriylsin (Neutral endopeptidase) (NEP) (Enkephalinase) (Common acute lymphocytic leukemia antigen) (CALLA) (Neutral endopeptidase 24.11) (CD10);nepriylsin, neutral endopeptidase, enkephalinase [-]                                       |
| NFKB1_HUMAN | both | KBF1_HUMAN;P19838;NF-kappaB            | nuclear factor NF-kappa-B [-]                                                                                                                                                                                                                |

|             |      |                           |                                                                                                                                                                                                                                                                     |
|-------------|------|---------------------------|---------------------------------------------------------------------------------------------------------------------------------------------------------------------------------------------------------------------------------------------------------------------|
| NK1R_HUMAN  | both | P25103;NK1R_HUMAN;NK1     | Substance-P receptor (SPR) (NK-1 receptor) (NK-1R) (Tachykinin receptor 1);substance-P receptor, tachykinin receptor 1 [-]                                                                                                                                          |
| NK2R_HUMAN  | both | P21452;NK2R_HUMAN;NK2     | Substance-K receptor (SKR) (Neurokinin A receptor) (NK-2 receptor) (NK-2R) (Tachykinin receptor 2);neurokinin A receptor, tachykinin receptor 2 [-]                                                                                                                 |
| NK3R_RAT    | both | P16177;NK3R_RAT;NK3       | Neuromedin K receptor (NKR) (Neurokinin B receptor) (NK-3 receptor) (NK-3R) (Tachykinin receptor 3);neurokinin B receptor, tachykinin receptor 3 [-]                                                                                                                |
| NMDE1_HUMAN | both | NME1_HUMAN;Q12879;NMDA    | glutamate receptor ionotropic, NMDA subtype 2A [-]                                                                                                                                                                                                                  |
| NMDE1_RAT   | both | NME1_RAT;Q00959;NMDA/PCP  | glutamate receptor ionotropic, NMDA, phencyclidine site [-]                                                                                                                                                                                                         |
| NMT_CANAL   | both | NMT_CANAL;P30418;NMTase   | Glycylpeptide N-tetradecanoyltransferase (Peptide N-myristoyltransferase) (Myristoyl-CoA:protein N-myristoyltransferase) (NMT);myristoylCoA:protein N-myristoyltransferase [-]                                                                                      |
| NOS1_RAT    | both | NOS1_RAT;P29476;nNOS      | Nitric-oxide synthase, brain (NOS, type I) (Neuronal NOS) (N-NOS) (nNOS) (Constitutive NOS) (NC-NOS) (BNOS);neuronal nitric-oxide synthase, constitutive NOS, NOS, type I [-]                                                                                       |
| NOS2_MOUSE  | both | NOS2_MOUSE;P29477;iNOS    | Nitric oxide synthase, inducible (NOS, type II) (Inducible NOS) (iNOS) (Macrophage NOS) (MAC-NOS);nitric-oxide synthase, inducible [-]                                                                                                                              |
| NOS3_HUMAN  | both | NOS3_HUMAN;P29474;eNOS    | Nitric-oxide synthase, endothelial (EC-NOS) (NOS, type III) (NOSIII) (Endothelial NOS) (eNOS) (Constitutive NOS) (cNOS);nitric-oxide synthase, endothelial, constitutive NOS [-]                                                                                    |
| NPY1R_HUMAN | both | P25929;NPY1R_HUMAN;NPY1-R | Neuropeptide Y receptor type 1 (NPY1-R);neuropeptide Y receptor type 1 [-]                                                                                                                                                                                          |
| NPY5R_HUMAN | both | Q15761;NPY5R_HUMAN;NPY5-R | Neuropeptide Y receptor type 5 (NPY5-R) (NPY-Y5 receptor) (Y5 receptor) (NPYY5);neuropeptide Y receptor type 5 [-]                                                                                                                                                  |
| NQO1_HUMAN  | both | NQO1_HUMAN;P15559;DTD     | NAD(P)H dehydrogenase [quinone] 1 (Quinone reductase 1) (QR1) (DT-diaphorase) (DTD) (Azoreductase) (Phylloquinone reductase) (Menadione reductase);NAD(P)H dehydrogenase [quinone] 1, DT-diaphorase, azoreductase, phylloquinone reductase, menadione reductase [-] |

|             |      |                               |                                                                                                                                                                                                                                                                                        |
|-------------|------|-------------------------------|----------------------------------------------------------------------------------------------------------------------------------------------------------------------------------------------------------------------------------------------------------------------------------------|
| NR1H2_HUMAN | both | P55055;NR1H2_HUMAN;LXRbeta    | Oxysterols receptor LXR-beta (Liver X receptor beta) (Nuclear orphan receptor LXR-beta) (Ubiquitously-expressed nuclear receptor) (Nuclear receptor NER);liver X receptor [+]                                                                                                          |
| NR1H3_HUMAN | both | NRH3_HUMAN;Q13133;LXRalpha    | liver X receptor [+]                                                                                                                                                                                                                                                                   |
| NR1H4_HUMAN | both | NRH4_HUMAN;Q96R11;FXR         | farnesoid X-activated receptor, bile acid receptor                                                                                                                                                                                                                                     |
| NTCP_HUMAN  | both | NTCP_HUMAN;Q14973;ASBT        | Sodium/bile acid cotransporter (Na(+)/bile acid cotransporter) (Na(+)/taurocholate transport protein) (Sodium/taurocholate cotransporting polypeptide);apical sodium codependent bile acid transporter, ileal sodium/bile acid cotransporter, Na(+)/taurocholate transport protein [-] |
| NTR1_HUMAN  | both | P30989;NTR1_HUMAN;NT1         | Neurotensin receptor type 1 (NT-R-1) (High-affinity levocabastine-insensitive neurotensin receptor) (NTRH);neurotensin receptor type 1 [-]                                                                                                                                             |
| NTR1_MOUSE  | both | O88319;NTR1_MOUSE;NT          | Neurotensin receptor type 1 (NT-R-1);neurotensin receptor [-]                                                                                                                                                                                                                          |
| NTR1_RAT    | both | P20789;NTR1_RAT;NTR           | Neurotensin receptor type 1 (NT-R-1) (High-affinity levocabastine-insensitive neurotensin receptor) (NTRH);neurotensin receptor type 1 [-]                                                                                                                                             |
| NTR2_HUMAN  | both | O95665;NTR2_HUMAN;NT2         | Neurotensin receptor type 2 (NT-R-2) (Levocabastine-sensitive neurotensin receptor) (NTR2 receptor);neurotensin receptor type 2 [-]                                                                                                                                                    |
| NTRK1_HUMAN | both | TRKA_HUMAN;P04629;TrkA        | high affinity nerve growth factor receptor, Slow nerve growth factor receptor [-]                                                                                                                                                                                                      |
| OPRD_HUMAN  | both | P41143;OPRD_HUMAN;delta       | Delta-type opioid receptor (DOR-1);delta-type opioid receptor [-]                                                                                                                                                                                                                      |
| OPRK_HUMAN  | both | P41145;OPRK_HUMAN;kappa       | Kappa-type opioid receptor (KOR-1);kappa-type opioid receptor [-]                                                                                                                                                                                                                      |
| OPRM_HUMAN  | both | P35372;OPRM_HUMAN;mu          | Mu-type opioid receptor (MOR-1);mu-type opioid receptor [-]                                                                                                                                                                                                                            |
| OPRM_RAT    | both | P33535;OPRM_RAT;mu plus kappa | Mu-type opioid receptor (MOR-1) (Opioid receptor B) (MUOR1);mu and kappa-type opioid receptors [-]                                                                                                                                                                                     |
| OPRS1_RAT   | both | Q9R0C9;sigma1                 | sigma receptor, type 1 [-]                                                                                                                                                                                                                                                             |
| OX1R_HUMAN  | both | O43613;OX1R_HUMAN;OX1R        | Orexin receptor type 1 (Ox1r) (Hypocretin receptor type 1);orexin receptor type 1 [-]                                                                                                                                                                                                  |
| OX2R_HUMAN  | both | O43614;OX2R_HUMAN;OX2R        | Orexin receptor type 2 (Ox2r) (Hypocretin receptor type 2);orexin receptor type 2 [-]                                                                                                                                                                                                  |
| OXYR_HUMAN  | both | P30559;OXYR_HUMAN;OT          | Oxytocin receptor (OT-R);oxytocin receptor [-]                                                                                                                                                                                                                                         |
| P2RX7_HUMAN | both | P2X7_HUMAN;Q99572;P2X7 R      | P2X purinoceptor 7 [-]                                                                                                                                                                                                                                                                 |



|              |      |                             |                                                                                                                                                                                                                                                                                                             |
|--------------|------|-----------------------------|-------------------------------------------------------------------------------------------------------------------------------------------------------------------------------------------------------------------------------------------------------------------------------------------------------------|
| P2RY2_HUMAN  | both | P41231;P2RY2_HUMAN;P2Y2 R   | P2Y purinoceptor 2 (P2Y2) (P2U purinoceptor 1) (P2U1) (ATP receptor) (Purinergetic receptor);P2Y purinoceptor 2, ATP receptor [-]                                                                                                                                                                           |
| P2Y12_HUMAN  | both | Q9H244;P2Y12_HUMAN;P2T      | P2Y purinoceptor 12 (P2Y12) (P2Y12 platelet ADP receptor) (P2Y(ADP)) (ADP-glucose receptor) (ADPG-R) (P2Y(AC)) (P2Y(cyc)) (P2T(AC)) (SP1999);P2Y12 platelet ADP receptor, P2YC purinoceptor 12 [-]                                                                                                          |
| P90584_PLAFA | both | P90584_PLAFA;Pfmrk          | MO15-related protein kinase Pfmrk;MO15-related protein kinase Pfmrk [-]                                                                                                                                                                                                                                     |
| PA21B_HUMAN  | both | PA21_HUMAN;P04054;PLA2      | PAF 2-acylhydrolase [-]                                                                                                                                                                                                                                                                                     |
| PA24A_HUMAN  | both | PA24A_HUMAN;P47712;cPLA2    | Cytosolic phospholipase A2 (cPLA2) (Phospholipase A2 group IVA) (Phospholipase A2) (Phosphatidylcholine 2-acylhydrolase) (Lysophospholipase);cytosolic phospholipase A2, phospholipase A2 group IVA [-]                                                                                                     |
| PA2GA_HUMAN  | both | PA2GA_HUMAN;P14555;NPS-PLA2 | Phospholipase A2, membrane associated precursor (Phosphatidylcholine 2-acylhydrolase) (Group IIA phospholipase A2) (GIIC sPLA2) (Non-pancreatic secretory phospholipase A2) (NPS-PLA2);phosphatidylcholine 2-acylhydrolase, group IIA phospholipase A2, non-pancreatic secretory phospholipase A2 [-]       |
| PAFA_HUMAN   | both | PAFA_HUMAN;Q13093;Lp-PLA2   | Platelet-activating factor acetylhydrolase precursor (PAF acetylhydrolase) (PAF 2-acylhydrolase) (LDL-associated phospholipase A2) (LDL-PLA(2)) (2-acetyl-1-alkylglycerophosphocholine esterase) (1-alkyl-2-acetyl-glycerophosphocholine esterase);LDL-associated phospholipase A2, PAF 2-acylhydrolase [-] |
| PAPA1_CARPA  | both | PAPA_CARPA;P00784;papain    | Papaya proteinase I [-]                                                                                                                                                                                                                                                                                     |
| PAR1_HUMAN   | both | P25116;PAR1_HUMAN;PAR-1     | Proteinase activated receptor 1 precursor (PAR-1) (Thrombin receptor) (Coagulation factor II receptor);thrombin receptor, protease activated receptor-1 [-]                                                                                                                                                 |
| PARP1_HUMAN  | both | PPOL_HUMAN;P09874;PARP1     | poly(ADP-ribose) polymerase-1, NAD(+) ADP-ribosyltransferase, poly(ADP-ribose) synthetase [-]                                                                                                                                                                                                               |
| PARP2_MOUSE  | both | PPO2_MOUSE;O88554;PARP      | poly(ADP-ribose) polymerase-1, NAD(+) ADP-ribosyltransferase, poly(ADP-ribose) synthetase [-]                                                                                                                                                                                                               |
| PCKGC_HUMAN  | both | PPCKC_HUMAN;P35558;PPEPCK   | phosphoenolpyruvate carboxykinase [ATP] [-]                                                                                                                                                                                                                                                                 |

|             |      |                              |                                                                                                                                                                      |
|-------------|------|------------------------------|----------------------------------------------------------------------------------------------------------------------------------------------------------------------|
| PD2R_HUMAN  | both | Q13258;PD2R_HUMAN;DP         | Prostaglandin D2 receptor (Prostanoid DP receptor) (PGD receptor);prostaglandin D2 receptor [-]                                                                      |
| PDE11_HUMAN | both | Q9GZY7;PDE11                 | cAMP/cGMP cyclic nucleotide phosphodiesterase 11A [-]                                                                                                                |
| PDE1A_BOVIN | both | CN1A_BOVIN;P14100;PDE1       | calcium/calmodulin-dependent cyclic nucleotide PDE 1 [-]                                                                                                             |
| PDE2A_BOVIN | both | CN2A_BOVIN;P14099;PDE2       | cGMP-stimulated PDE [-]                                                                                                                                              |
| PDE3A_HUMAN | both | CN3A_HUMAN;Q14432;PDE3       | cGMP-inhibited PDE [-]                                                                                                                                               |
| PDE4A_HUMAN | both | PDE4A_HUMAN;P27815;PDE4AL    | cAMP-specific 3,5-cyclic phosphodiesterase 4A (DPDE2) (PDE46);cAMP-specific PDE [-]                                                                                  |
| PDE4B_HUMAN | both | CN4B_HUMAN;Q07343;PDE4B      | cAMP-specific PDE [-]                                                                                                                                                |
| PDE4C_HUMAN | both | CN4C_HUMAN;Q08493;PDE4C      | cAMP-specific PDE [-]                                                                                                                                                |
| PDE4D_HUMAN | both | PDE4D_HUMAN;Q08499;PDE4D2    | cAMP-specific 3,5-cyclic phosphodiesterase 4D (DPDE3) (PDE43);cAMP-specific PDE [-]                                                                                  |
| PDE5A_HUMAN | both | CN5A_HUMAN;O76074;PDE5       | cGMP-specific PDE [-]                                                                                                                                                |
| PDE6B_BOVIN | both | CNRB_BOVIN;P23439;PDE6       | rod cGMP-specific PDE 6B [-]                                                                                                                                         |
| PDE7A_HUMAN | both | CN7A_HUMAN;Q13946;PDE7       | high affinity cAMP-specific 3',5'-cyclic phosphodiesterase 7A [-]                                                                                                    |
| PDK1_RAT    | both | PDK1_RAT;Q63065;PDHKase      | [Pyruvate dehydrogenase [lipoamide]] kinase isozyme 1, mitochondrial precursor (Pyruvate dehydrogenase kinase isoform 1) (PDK P48);pyruvate dehydrogenase kinase [-] |
| PDPK1_HUMAN | both | PDPK_HUMAN;O15530;PDK1       | 3-phosphoinositide dependent protein kinase-1 [-]                                                                                                                    |
| PE2R1_HUMAN | both | P34995;PE2R1_HUMAN;EP1       | Prostaglandin E2 receptor, EP1 subtype (Prostanoid EP1 receptor) (PGE receptor, EP1 subtype);prostaglandin E2 receptor, EP1 subtype [-]                              |
| PE2R2_HUMAN | both | P43116;PE2R2_HUMAN;EP2       | Prostaglandin E2 receptor, EP2 subtype (Prostanoid EP2 receptor) (PGE receptor, EP2 subtype);prostaglandin E2 receptor, EP12 subtype [-]                             |
| PE2R3_HUMAN | both | P43115;PE2R3_HUMAN;EP3       | Prostaglandin E2 receptor, EP3 subtype (Prostanoid EP3 receptor) (PGE receptor, EP3 subtype);prostaglandin E2 receptor, EP3 subtype [-]                              |
| PE2R4_HUMAN | both | P35408;PE2R4_HUMAN;EP4       | Prostaglandin E2 receptor, EP4 subtype (Prostanoid EP4 receptor) (PGE receptor, EP4 subtype);prostaglandin E2 receptor, EP4 subtype [-]                              |
| PEPA_PIG    | both | PEPA_PIG;P00791;pepsin       | Pepsin A precursor;pepsin A [-]                                                                                                                                      |
| PEPC_HUMAN  | both | PEPC_HUMAN;P20142;gastricsin | Gastricsin precursor (Pepsinogen C);pepsinogen C [-]                                                                                                                 |
| PF2R_HUMAN  | both | P43088;PF2R_HUMAN;FP         | Prostaglandin F2-alpha receptor (Prostanoid FP)                                                                                                                      |

|             |      |                                |                                                                                                                                                                                                                                         |
|-------------|------|--------------------------------|-----------------------------------------------------------------------------------------------------------------------------------------------------------------------------------------------------------------------------------------|
| PGFRA_HUMAN | both | PGFRA_HUMAN;P16234;PDGFR-alpha | receptor) (PGF receptor) (PGF2 alpha receptor);prostaglandin F2-alpha receptor [-] Alpha platelet-derived growth factor receptor precursor (PDGF-R-alpha) (CD140a antigen);alpha-platelet derived growth factor receptor [-]            |
| PGH1_HUMAN  | both | PGH1_HUMAN;P23219;Q15122;COX-1 | Prostaglandin G/H synthase 1 precursor (Cyclooxygenase -1) (COX-1) (Prostaglandin-endoperoxide synthase 1) (Prostaglandin H2 synthase 1) (PGH synthase 1) (PGHS-1) (PHS 1);prostaglandin H2 synthase 1, constitutive cyclooxygenase [-] |
| PGH2_HUMAN  | both | PGH2_HUMAN;P35354;Q16876;COX-2 | Prostaglandin G/H synthase 2 precursor (Cyclooxygenase -2) (COX-2) (Prostaglandin-endoperoxide synthase 2) (Prostaglandin H2 synthase 2) (PGH synthase 2) (PGHS-2) (PHS II);prostaglandin H2 synthase 2, inducible cyclooxygenase [-]   |
| PGK_YEAST   | both | PGK_YEAST;P00560;PGK1          | Phosphoglycerate kinase;phosphoglycerate kinase [-]                                                                                                                                                                                     |
| PI2R_HUMAN  | both | P43119;PI2R_HUMAN;IP           | Prostacyclin receptor (Prostanoid IP receptor) (PGI receptor) (Prostaglandin I2 receptor);prostaglandin I2 receptor, prostacyclin receptor [-]                                                                                          |
| PLM1_PLAFA  | both | PLM1_PLAFA;P39898;plasmepsin 1 | Plasmepsin 1 precursor (Aspartic hemoglobinase I) (PFAPG);aspartic hemoglobinase I [-]                                                                                                                                                  |
| PLM2_PLAFA  | both | PLM2_PLAFA;P46925;plasmepsin 2 | Plasmepsin 2 precursor (Aspartic hemoglobinase II) (PFAPD);aspartic hemoglobinase II [-]                                                                                                                                                |
| PLMN_HUMAN  | both | PLMN_HUMAN;P00747;plasmin      | Plasminogen precursor [Contains: (Angiostatin)];plasminogen [-]                                                                                                                                                                         |
| PPARA_HUMAN | both | PPAR_HUMAN;Q07869;PPAR-alpha   | peroxisome proliferator-activated receptor alpha [-]                                                                                                                                                                                    |
| PPARD_HUMAN | both | Q03181;PPAR-delta              | PPAR-delta [-]                                                                                                                                                                                                                          |
| PPARG_HUMAN | both | PPAT_HUMAN;P37231;PPAR-gamma   | peroxisome proliferator-activated receptor gamma [-]                                                                                                                                                                                    |
| PPCE_PIG    | both | PPCE_PIG;P23687;POP            | Prolyl endopeptidase (Post-proline cleaving enzyme) (PE);prolyl endopeptidase, prolyl oligopeptidase, post-proline cleaving enzyme [-]                                                                                                  |
| PPIA_HUMAN  | both | PPIA_HUMAN;P62937;rotamase A   | Peptidyl-prolyl cis-trans isomerase A (PPIase) (Rotamase) (Cyclophilin A) (Cyclosporin A-binding protein);peptidyl-prolyl cis-trans isomerase, rotamase, PPIase [-]                                                                     |
| PPR_HCMVA   | both | VP40_HCMVA;P16753;HCMV P       | human cytomegalovirus protease [-]                                                                                                                                                                                                      |

|              |      |                                         |                                                                                                                                                                                                                                                                                      |
|--------------|------|-----------------------------------------|--------------------------------------------------------------------------------------------------------------------------------------------------------------------------------------------------------------------------------------------------------------------------------------|
| PRGR_HUMAN   | both | PRGR_HUMAN;P06401;PR-B                  | Progesterone receptor (PR);progesterone receptor [-]                                                                                                                                                                                                                                 |
| PROC_HUMAN   | both | PRTC_HUMAN;P04070;APC                   | vitamin K-dependent protein C, autoproteolytic factor IIA, anticoagulant protein C, blood coagulation factor XIV [-]                                                                                                                                                                 |
| PTGIS_HUMAN  | both | PTGI_HUMAN;Q16647;prostacyclin synthase | prostaglandin I2 synthase [-]                                                                                                                                                                                                                                                        |
| PTN1_HUMAN   | both | PTN1_HUMAN;P18031;PTP-1B                | Tyrosine-protein phosphatase, non-receptor type 1 (Protein-tyrosine phosphatase 1B) (PTP-1B);protein-tyrosine phosphatase 1B [-]                                                                                                                                                     |
| PTN1_RAT     | both | PTN1_RAT;P20417;PTP1                    | Tyrosine-protein phosphatase, non-receptor type 1 (Protein-tyrosine phosphatase 1B) (PTP-1B);protein-tyrosine phosphatase 1 [-]                                                                                                                                                      |
| PTN2_HUMAN   | both | PTN2_HUMAN;P17706;TCPTP                 | Tyrosine-protein phosphatase, non-receptor type 2 (T-cell protein-tyrosine phosphatase) (TCPTP);T-cell protein-tyrosine phosphatase, protein-tyrosine phosphatase, non-receptor type 2 [-]                                                                                           |
| PTN6_HUMAN   | both | PTN6_HUMAN;P29350;SHP-1                 | Tyrosine-protein phosphatase, non-receptor type 6 (Protein-tyrosine phosphatase 1C) (PTP-1C) (Hematopoietic cell protein-tyrosine phosphatase) (SH-PTP1) (Protein-tyrosine phosphatase SHP-1);protein-tyrosine phosphatase 1C, protein-tyrosine phosphatase, non-receptor type 6 [-] |
| PTPRA_HUMAN  | both | PTRA_HUMAN;P18433;PTPase                | protein-tyrosine phosphatase alpha [-]                                                                                                                                                                                                                                               |
| PTPRB_HUMAN  | both | PTPB_HUMAN;P23467;PTP-beta              | protein-tyrosine phosphatase beta [-]                                                                                                                                                                                                                                                |
| PUR9_HUMAN   | both | PUR9_HUMAN;P31939;AICART                | Bifunctional purine biosynthesis protein PURH (OK/SW-cl.86)<br>(Phosphoribosylaminoimidazolecarboxamide formyltransferase) (AICAR transformylase) (IMP cyclohydrolase) (Inosinicase) (IMP synthetase) (ATIC);AICAR transformylase [-]                                                |
| PYGL_HUMAN   | both | PHS1_HUMAN;P06737;LGPase                | glycogen phosphorylase, liver form [-]                                                                                                                                                                                                                                               |
| PYGM_HUMAN   | both | PHS2_HUMAN;P11217;MGPase                | glycogen phosphorylase, muscle form [-]                                                                                                                                                                                                                                              |
| PYGM_RABIT   | both | PHS2_RABIT;P00489;GPase b               | glycogen phosphorylase b [-]                                                                                                                                                                                                                                                         |
| PYRD_MOUSE   | both | PYRD_MOUSE;O35435;DHODHase              | Dihydroorotate dehydrogenase, mitochondrial precursor (Dihydroorotate oxidase) (DHODHase);dihydroorotate oxidase [-]                                                                                                                                                                 |
| Q95PM0_TRYBR | both | Q95PM0_TRYBR;rhodesain                  | Cysteine protease;rhodesain [-]                                                                                                                                                                                                                                                      |
| Q965D6_PLAFA | both | Q965D6_PLAFA;FabG                       | 3-oxoacyl-acyl-carrier protein reductase precursor (EC 1.1.1.100).;3-oxoacyl-[acyl-carrier-protein] reductase, 3-ketoacyl-acyl carrier protein reductase                                                                                                                             |

|              |      |                               |                                                                                                                                                                                                                                     |
|--------------|------|-------------------------------|-------------------------------------------------------------------------------------------------------------------------------------------------------------------------------------------------------------------------------------|
| Q9Y0I0_9TRYP | both | Q9Y0I0;P2 transporter         | [-]                                                                                                                                                                                                                                 |
| QPCT_HUMAN   | both | QPCT_HUMAN;Q16769;QC          | P2 nucleoside transporter [-]<br>Glutaminyl-peptide cyclotransferase precursor (EC 2.3.2.5) (QC) (Glutaminyl-tRNA cyclotransferase) (Glutaminyl cyclase).;glutaminyl-peptide cyclotransferase, glutaminyl-tRNA cyclotransferase [-] |
| RAF1_HUMAN   | both | RAF1_HUMAN;P04049;c-Raf       | RAF proto-oncogene serine/threonine-protein kinase (Raf-1) (C-RAF) (cRaf);RAF proto-oncogene serine/threonine-protein kinase [-]                                                                                                    |
| RARA_HUMAN   | both | RRA_HUMAN;P10276;RAR-alpha    | retinoic acid receptor alpha [-]                                                                                                                                                                                                    |
| RARB_HUMAN   | both | P10826;RRB_HUMAN;RAR-beta1    | retinoic acid receptor beta isoform 1 [+]                                                                                                                                                                                           |
| RARG_HUMAN   | both | RRG1_HUMAN;P13631;RAR-gamma   | retinoic acid receptor gamma [-]                                                                                                                                                                                                    |
| RENI_HUMAN   | both | RENI_HUMAN;P00797;renin       | Renin precursor<br>(Angiotensinogenase);angiotensinogenase [-]                                                                                                                                                                      |
| RIR1_HHV11   | both | RIR1_HHV11;P08543;HSV-1 RRase | Ribonucleoside-diphosphate reductase large chain (Ribonucleotide reductase) (136 kDa subunit);ribonucleotide reductase [-]                                                                                                          |
| ROCK2_HUMAN  | both | ROC2_HUMAN;O75116;ROCK2       | rho-associated protein kinase 2 [-]                                                                                                                                                                                                 |
| RXRA_HUMAN   | both | RXRA_HUMAN;P19793;RXR-alpha   | Retinoic acid receptor RXR-alpha (Retinoid X receptor alpha);retinoid X receptor RXR-alpha [-]                                                                                                                                      |
| RXRB_HUMAN   | both | RXRB_HUMAN;P28702;RXR-beta    | Retinoic acid receptor RXR-beta (Retinoid X receptor beta);retinoid X receptor RXR-beta [-]                                                                                                                                         |
| RXRG_HUMAN   | both | RXRG_HUMAN;P48443;RXR-gamma   | Retinoic acid receptor RXR-gamma (Retinoid X receptor gamma);retinoid X receptor RXR-gamma [-]                                                                                                                                      |
| S100B_HUMAN  | both | S100B_HUMAN;P04271;S100B      | S-100 calcium-binding protein beta subunit (S-100 protein, beta chain);S-100 protein, beta chain                                                                                                                                    |
| S15A1_HUMAN  | both | PET1_HUMAN;P46059;PEPT1       | oligopeptide transporter, small intestine isoform, intestinal H <sup>+</sup> /peptide cotransporter [-]                                                                                                                             |
| S1PR1_HUMAN  | both | P21453;EDG1_HUMAN;S1P1        | sphingosine 1-phosphate receptor 1 [-]                                                                                                                                                                                              |
| S1PR2_HUMAN  | both | O95136;EDG5_HUMAN;S1P2        | sphingosine 1-phosphate receptor 2, endothelial differentiation G-protein coupled receptor 5                                                                                                                                        |
| S1PR3_HUMAN  | both | Q99500;EDG3_HUMAN;S1P3        | sphingosine 1-phosphate receptor 3 [-]                                                                                                                                                                                              |
| S1PR4_HUMAN  | both | O95977;EDG6_HUMAN;S1P4        | sphingosine 1-phosphate receptor 4, endothelial differentiation G-protein coupled receptor 6 [-]                                                                                                                                    |
| S1PR5_HUMAN  | both | EDG8_HUMAN;Q9H228;S1P5        | sphingosine 1-phosphate receptor 5, endothelial differentiation sphingolipid G-protein-coupled receptor 8 [-]                                                                                                                       |
| S29A1_HUMAN  | both | S291_HUMAN;Q99808;ENT1        | equilibrative nucleoside transporter 1, equilibrative                                                                                                                                                                               |

|             |      |                                     |                                                                                                                                                                                                                 |
|-------------|------|-------------------------------------|-----------------------------------------------------------------------------------------------------------------------------------------------------------------------------------------------------------------|
| S5A1_HUMAN  | both | S5A1_HUMAN;P18405;5alpha-R1         | nitrobenzylmercaptapurine riboside-sensitive nucleoside transporter [-]<br>3-oxo-5-alpha-steroid 4-dehydrogenase 1 (Steroid 5-alpha-reductase 1) (SR type 1) (S5AR);3-oxo-5-alpha-steroid 4-dehydrogenase 1 [-] |
| S5A2_HUMAN  | both | S5A2_HUMAN;P31213;5alpha-R2         | 3-oxo-5-alpha-steroid 4-dehydrogenase 2 (Steroid 5-alpha-reductase 2) (SR type 2) (5 alpha-SR2);3-oxo-5-alpha-steroid 4-dehydrogenase 1 [-]                                                                     |
| SC6A1_RAT   | both | S6A1_RAT;P23978;GAT1                | sodium- and chloride-dependent GABA transporter [-]                                                                                                                                                             |
| SC6A2_MOUSE | both | S6A2_MOUSE;O55192;NET               | sodium-dependent norepinephrine transporter [-]                                                                                                                                                                 |
| SC6A3_RAT   | both | S6A3_RAT;P23977;DAT                 | sodium-dependent dopamine transporter [-]                                                                                                                                                                       |
| SC6A4_HUMAN | both | S6A4_HUMAN;P31645;5-HTT             | sodium-dependent serotonin transporter [-]                                                                                                                                                                      |
| SC6A5_HUMAN | both | S6A5_HUMAN;Q9Y345;GlyT-2            | sodium- and chloride-dependent glycine transporter 2 [-]                                                                                                                                                        |
| SCN2A_RAT   | both | CIN2_RAT;P04775;Na(+) channel       | Sodium channel protein type II alpha subunit [-]                                                                                                                                                                |
| SGK1_HUMAN  | both | SGK1_HUMAN;O00141;SGK               | Serine/threonine-protein kinase Sgk1 (Serum/glucocorticoid-regulated kinase 1);serum- and glucocorticoid-induced kinase 1 [-]                                                                                   |
| SIRT1_HUMAN | both | SIRT1_HUMAN;Q96EB6;SIRT1            | NAD-dependent deacetylase sirtuin-1 (EC 3.5.1.-) (hSIRT1) (hSIR2) (SIR2-like protein 1).;NAD-dependent deacetylase sirtuin 1 [-]                                                                                |
| SL9A1_HUMAN | both | NAH1_HUMAN;P19634;NHE-1             | Na(+)/H(+) antiporter, amiloride-sensitive, Na(+)/H(+) exchanger 1, Na(+)/H(+) antiporter, amiloride-sensitive [-]                                                                                              |
| SL9A1_RABIT | both | NAH1_RABIT;P23791;Na(+)/H(+) ATPase | Na(+)/H(+) exchanger 1, Na(+)/H(+) antiporter, amiloride-sensitive [-]                                                                                                                                          |
| SNAT_SHEEP  | both | SNAT_SHEEP;Q29495;AANAT             | Serotonin N-acetyltransferase (Aralkylamine N-acetyltransferase) (AA-NAT) (Serotonin acetylase);serotonin N-acetyltransferase, aralkylamine N-acetyltransferase, melatonin rhythm enzyme [-]                    |
| SQHC_ALIAC  | both | SQHC_ALIAC;P33247;SHC               | Squalene--hopene cyclase;squalene-hopene cyclase [-]                                                                                                                                                            |
| SRC_MOUSE   | both | SRC_MOUSE;P05480;Src                | Neuronal proto-oncogene tyrosine-protein kinase SRC (p60-SRC) (C-SRC);proto-oncogene tyrosine-protein kinase SRC [-]                                                                                            |
| SSR1_HUMAN  | both | P30872;SSR1_HUMAN;sst1              | Somatostatin receptor type 1 (SS1R) (SRIF-2);somatostatin receptor type 1 [-]                                                                                                                                   |
| SSR2_HUMAN  | both | P30874;SSR2_HUMAN;sst2              | Somatostatin receptor type 2 (SS2R) (SRIF-                                                                                                                                                                      |

|            |      |                                   |                                                                                                                                                                                                                               |
|------------|------|-----------------------------------|-------------------------------------------------------------------------------------------------------------------------------------------------------------------------------------------------------------------------------|
| SSR2_MOUSE | both | P30875;SSR2_MOUSE;sst2b           | 1);somatostatin receptor type 2 [-]<br>Somatostatin receptor type 2 (SS2R) (SRIF-1);somatostatin receptor type 2b [-]                                                                                                         |
| SSR3_HUMAN | both | P32745;SSR3_HUMAN;sst3            | Somatostatin receptor type 3 (SS3R) (SSR-28);somatostatin receptor type 3 [-]                                                                                                                                                 |
| SSR4_HUMAN | both | P31391;SSR4_HUMAN;sst4            | Somatostatin receptor type 4 (SS4R);somatostatin receptor type 4 [-]                                                                                                                                                          |
| SSR5_HUMAN | both | P35346;SSR5_HUMAN;sst5            | Somatostatin receptor type 5 (SS5R);somatostatin receptor type 5 [-]                                                                                                                                                          |
| ST14_HUMAN | both | ST14_HUMAN;Q9Y5Y6;matriptase      | Suppressor of tumorigenicity 14 (Matriptase) (Membrane-type serine protease 1) (MT-SP1) (Prostamin) (Serine protease TADG-15) (Tumor associated differentially-expressed gene-15 protein);suppressor of tumorigenicity 14 [-] |
| STK6_HUMAN | both | STK6_HUMAN;O14965;Aurora-A        | serine/threonine protein kinase 6 [Homo sapiens];serine/threonine-protein kinase 6, serine/threonine kinase 15, breast-tumor-amplified kinase [-]                                                                             |
| STS_HUMAN  | both | STS_HUMAN;P08842;StSase           | Steryl-sulfatase precursor (Steroid sulfatase) (Steryl-sulfate sulfohydrolase) (Arylsulfatase C) (ASC);steroid sulfatase, estrone sulfatase [-]                                                                               |
| SUIS_RAT   | both | SUIS_RAT;P23739;sucrase           | Sucrase-isomaltase, intestinal [Contains: (Sucrase) ] [Contains: (Isomaltase) ];sucrose alpha-glucosidase [-]                                                                                                                 |
| SYM_ECOLI  | both | SYM_ECOLI;P00959;MetRS            | Methionyl-tRNA synthetase (Methionine--tRNA ligase) (MetRS);methionyl-tRNA synthetase, methionine-tRNA ligase [-]                                                                                                             |
| TA2R_HUMAN | both | P21731;TA2R_HUMAN;TP              | Thromboxane A2 receptor (TXA2-R) (Prostanoid TP receptor);thromboxane A2/prostaglandin H2 receptor [-]                                                                                                                        |
| TERT_HUMAN | both | TERT_HUMAN;O14746;telomerase      | Telomerase reverse transcriptase (Telomerase catalytic subunit) (HEST2) (Telomerase-associated protein 2) (TP2);telomerase reverse transcriptase [-]                                                                          |
| THAS_HUMAN | both | THAS_HUMAN;P24557;TXA2 synthase   | Thromboxane-A synthase (TXA synthase) (TXS);thromboxane A2 synthase [-]                                                                                                                                                       |
| THB_HUMAN  | both | THB1_HUMANP10828;Q13986;THR-beta1 | thyroid hormone receptor beta-1 [-]                                                                                                                                                                                           |
| THB_RAT    | both | THB1_RAT;P18113;THR               | thyroid hormone receptor [-]                                                                                                                                                                                                  |
| THER_BACTH | both | THER_BACTH;P00800;TL              | Thermolysin precursor (Thermostable neutral proteinase);thermolysin [-]                                                                                                                                                       |
| THRB_HUMAN | both | THRB_HUMAN;P00734;thrombin        | Prothrombin precursor (Coagulation factor                                                                                                                                                                                     |

|             |      |                              |                                                                                                                                                                                                                                                     |
|-------------|------|------------------------------|-----------------------------------------------------------------------------------------------------------------------------------------------------------------------------------------------------------------------------------------------------|
| TIE2_HUMAN  | both | TIE2_HUMAN;Q02763;Tie-2      | II);coagulation factor II [-]<br>Angiopoietin 1 receptor precursor (Tyrosine-protein kinase receptor TIE-2) (Tyrosine-protein kinase receptor TEK) (P140 TEK) (Tunica interna endothelial cell kinase) (CD202b antigen);angiopoietin 1 receptor [-] |
| TNR16_HUMAN | both | TNR16_HUMAN;P08138;NGFR      | Tumor necrosis factor receptor superfamily member 16 precursor (Low-affinity nerve growth factor receptor) (NGF receptor) (Gp80-LNGFR) (p75 ICD) (Low affinity neurotrophin receptor p75NTR);low-affinity nerve growth factor receptor, p75NTR [-]  |
| TNR1A_HUMAN | both | TR1A_HUMAN;P19438;TNFR1      | tumor necrosis factor receptor superfamily member 1A [-]                                                                                                                                                                                            |
| TPA_HUMAN   | both | TPA_HUMAN;P00750;tPA         | Tissue-type plasminogen activator precursor (tPA) (t-PA) (t-plasminogen activator) (Alteplase) (Reteplase);tissue-type plasminogen activator [-]                                                                                                    |
| TPP2_RAT    | both | TPP2_RAT;Q64560;TPP II       | Tripeptidyl-peptidase II (TPP-II) (Tripeptidyl aminopeptidase) (Cholecystokinin-inactivating peptidase);tripeptidyl peptidase II [-]                                                                                                                |
| TRFR_MOUSE  | both | P21761;TRFR_MOUSE;TRHR       | Thyrotropin-releasing hormone receptor (TRH-R) (Thyroliberin receptor);thyrotropin-releasing hormone receptor, thyroliberin receptor [-]                                                                                                            |
| TRPV1_RAT   | both | O35433_RAT;O35433;VR         | capsaicin receptor, vanilloid receptor [-]                                                                                                                                                                                                          |
| TRY1_BOVIN  | both | TRY1_BOVIN;P00760;trypsin    | Cationic trypsin precursor (Beta-trypsin);cationic trypsinogen [-]                                                                                                                                                                                  |
| TSPO_RAT    | both | BZRP_RAT;P16257;PBzR         | peripheral-type benzodiazepine receptor [-]                                                                                                                                                                                                         |
| TTHY_HUMAN  | both | TTHY_HUMAN;P02766;TTR        | Transthyretin precursor (Prealbumin) (TBPA) (TTR) (ATTR);transthyretin [-]                                                                                                                                                                          |
| TYPH_HUMAN  | both | TYPH_HUMAN;P19971;TPase      | Thymidine phosphorylase precursor (TdRPase) (TP) (Platelet-derived endothelial cell growth factor) (PD-ECGF) (Gliostatin);thimidine phosphorylase [-]                                                                                               |
| TYRO_HUMAN  | both | TYRO_HUMAN;P14679;tyrosinase | Tyrosinase precursor (Monophenol monooxygenase) (Tumor rejection antigen AB) (SK29-AB) (LB24-AB);monophenol monooxygenase, tyrosinase [-]                                                                                                           |
| TYSY_LACCA  | both | TYSY_LACCA;P00469;TSase      | Thymidylate synthase (TS) (TSase);thymidylate synthase [-]                                                                                                                                                                                          |
| TYTR_TRYCR  | both | TYTR_TRYCR;P28593;TRase      | Trypanothione reductase (TR) (N(1),N(8)-bis(glutathionyl)spermidine reductase);trypanothione reductase [-]                                                                                                                                          |



|             |        |                           |                                                                                                                                                                                                 |
|-------------|--------|---------------------------|-------------------------------------------------------------------------------------------------------------------------------------------------------------------------------------------------|
| UPP1_MOUSE  | both   | UPP1_MOUSE;P52624;UrdPase | Uridine phosphorylase 1 (UrdPase 1) (UPase 1);uridine phosphorylase [-]                                                                                                                         |
| UR2R_RAT    | both   | P49684;UR2R_RAT;U-II-R    | Urotensin II receptor (UR-II-R) (G protein coupled receptor 14) (G protein-coupled sensory epithelial neuropeptide-like receptor) (SENR);urotensin II receptor [-]                              |
| UREA_CANEN  | both   | UREA_CANEN;P07374;urease  | Urease (EC 3.5.1.5) (Urea amidohydrolase);.urea amidohydrolase [-]                                                                                                                              |
| UROK_HUMAN  | both   | UROK_HUMAN;P00749;uPA     | Urokinase-type plasminogen activator precursor (uPA) (U-plasminogen activator);urokinase-type plasminogen activator [-]                                                                         |
| V1AR_RAT    | both   | P30560;V1AR_RAT;V1        | Vasopressin V1a receptor (V1aR) (Vascular/hepatic-type arginine vasopressin receptor) (Antidiuretic hormone receptor 1a) (AVPR V1a);vasopressin V1a receptor [-]                                |
| V1BR_HUMAN  | both   | P47901;V1BR_HUMAN;V1b     | Vasopressin V1b receptor (V1bR) (AVPR V1b) (Vasopressin V3 receptor) (AVPR V3) (Antidiuretic hormone receptor 1b);vasopressin V1a receptor [-]                                                  |
| V2R_RAT     | both   | V2R_RAT;Q00788;V2         | Vasopressin V2 receptor (Renal-type arginine vasopressin receptor) (Antidiuretic hormone receptor) (AVPR V2);vasopressin V2 receptor [-]                                                        |
| VACHT_TORCA | both   | VAT_TORCA;P81721;VACHT    | vesicular acetylcholine transporter [-]                                                                                                                                                         |
| VCAM1_HUMAN | both   | VCA1_HUMAN;P19320;VCAM-1  | vascular cell adhesion molecule-1 [-]                                                                                                                                                           |
| VDR_HUMAN   | both   | VDR_HUMAN;P11473;VDR      | Vitamin D3 receptor (VDR) (1,25-dihydroxyvitamin D3 receptor);vitamin D3 receptor [-]                                                                                                           |
| VGFR1_HUMAN | both   | VGR1_HUMAN;P17948;VEGFR-1 | vascular endothelial growth factor receptor 1, fms-like tyrosine kinase 1 [-]                                                                                                                   |
| VGFR1_MOUSE | both   | VGR1_MOUSE;P35969;VEGFR   | vascular endothelial growth factor receptor 1, fms-like tyrosine kinase 1 [-]                                                                                                                   |
| VGFR2_HUMAN | both   | VGR2_HUMAN;P35968;VEGFR-2 | vascular endothelial growth factor receptor 2 [-]                                                                                                                                               |
| VMAT2_RAT   | both   | VMT2_RAT;Q01827;VMAT      | synaptic vesicular amine transporter, monoamine transporter, vesicular amine transporter 2 [-]                                                                                                  |
| XIAP_HUMAN  | both   | BIRC4_HUMAN;P98170;XIAP   | X-linked inhibitor of apoptosis protein, baculoviral IAP repeat-containing protein 4, inhibitor of apoptosis protein 3 [-]                                                                      |
| ZAP70_HUMAN | both   | ZA70_HUMAN;P43403;ZAP-70  | 70 kDa zeta-associated protein [-]                                                                                                                                                              |
| 2A5A_HUMAN  | chembl | Q2NL72                    | Serine/threonine protein phosphatase 2A, 56 kDa regulatory subunit, alpha isoform (PP2A, B subunit, B alpha isoform) (PP2A, B subunit, B56 alpha isoform) (PP2A, B subunit, PR61 alpha isoform) |

|             |        |            |                                                                                                                                                                                                                                                                                        |
|-------------|--------|------------|----------------------------------------------------------------------------------------------------------------------------------------------------------------------------------------------------------------------------------------------------------------------------------------|
| 2ABG_HUMAN  | chembl | Q8NEC4     | (PP2A, B subunit, R5 alpha isoform)<br>Serine/threonine protein phosphatase 2A, 55 kDa regulatory subunit B, gamma isoform (PP2A, subunit B, B-gamma isoform) (PP2A, subunit B, B55-gamma isoform) (PP2A, subunit B, PR55-gamma isoform) (PP2A, subunit B, R2-gamma isoform) (IMYPNO1) |
| 2B11_HUMAN  | chembl | P04229     | HLA class II histocompatibility antigen, DRB1-1 beta chain precursor (MHC class I antigen DRB1*1) (DR-1) (DR1)                                                                                                                                                                         |
| 2B31_HUMAN  | chembl | 2B31_HUMAN | HLA class II histocompatibility antigen, DRB3-1 beta chain precursor (MHC class I antigen DRB3*1)                                                                                                                                                                                      |
| 3BHS2_HUMAN | chembl | P26439     | 3 beta-hydroxysteroid dehydrogenase/delta 5--4-isomerase type II (3Beta-HSD II) (3-beta-hydroxy-delta(5)-steroid dehydrogenase) (3-beta-hydroxy-5-ene steroid dehydrogenase) (Progesterone reductase) (Steroid delta-isomerase) (Delta-5-3-ketosteroid is...                           |
| 3BHS7_HUMAN | chembl | Q9BSN9     | 3 beta-hydroxysteroid dehydrogenase type VII (3Beta-HSD VII) (3-beta-hydroxy-delta(5)-C27 steroid oxidoreductase) (C(27) 3beta-HSD)                                                                                                                                                    |
| 5HT1A_MOUSE | chembl | Q64264     | 5-hydroxytryptamine 1A receptor (5-HT-1A) (Serotonin receptor 1A) (5-HT1A)                                                                                                                                                                                                             |
| 5HT1A_RAT   | chembl | P19327     | 5-hydroxytryptamine 1A receptor (5-HT-1A) (Serotonin receptor 1A) (5-HT1A)                                                                                                                                                                                                             |
| 5HT1B_RAT   | chembl | P28564     | 5-hydroxytryptamine 1B receptor (5-HT-1B) (Serotonin receptor 1B)                                                                                                                                                                                                                      |
| 5HT1D_PIG   | chembl | P79400     | 5-hydroxytryptamine 1D receptor (5-HT-1D) (Serotonin receptor 1D) (5-HT1D)                                                                                                                                                                                                             |
| 5HT1D_RAT   | chembl | P28565     | 5-hydroxytryptamine 1D receptor (5-HT-1D) (Serotonin receptor 1D)                                                                                                                                                                                                                      |
| 5HT1F_RAT   | chembl | P30940     | 5-hydroxytryptamine 1F receptor (5-HT-1F) (Serotonin receptor 1F)                                                                                                                                                                                                                      |
| 5HT2A_BOVIN | chembl | Q75Z89     | 5-hydroxytryptamine receptor 2A [Bos taurus]                                                                                                                                                                                                                                           |
| 5HT2A_MOUSE | chembl | P35363     | 5-hydroxytryptamine 2A receptor (5-HT-2A) (Serotonin receptor 2A) (5-HT-2)                                                                                                                                                                                                             |
| 5HT2A_PIG   | chembl | Q29004     | 5-hydroxytryptamine 2A receptor (5-HT-2A) (Serotonin receptor 2A) (5-HT-2) (5-HT2A)                                                                                                                                                                                                    |
| 5HT2B_MOUSE | chembl | Q02152     | 5-hydroxytryptamine 2B receptor (5-HT-2B) (Serotonin receptor 2B) (5-HT-2F) (NP75 protein)                                                                                                                                                                                             |

|              |        |        |                                                                                                                 |
|--------------|--------|--------|-----------------------------------------------------------------------------------------------------------------|
| 5HT2B_RAT    | chembl | P30994 | 5-hydroxytryptamine 2B receptor (5-HT-2B) (Serotonin receptor 2B) (5-HT-2F) (Stomach fundus serotonin receptor) |
| 5HT2C_MOUSE  | chembl | Q5WRU6 | 5-hydroxytryptamine 2C receptor (5-HT-2C) (Serotonin receptor 2C) (5HT-1C)                                      |
| 5HT2C_RAT    | chembl | P08909 | 5-hydroxytryptamine 2C receptor (5-HT-2C) (Serotonin receptor 2C) (5HT-1C)                                      |
| 5HT3A_HUMAN  | chembl | P46098 | 5-hydroxytryptamine 3 receptor precursor (5-HT-3) (Serotonin-gated ion channel receptor) (5-HT3R)               |
| 5HT3A_MOUSE  | chembl | P23979 | 5-hydroxytryptamine 3 receptor precursor (5-HT-3) (Serotonin-gated ion channel receptor) (5-HT3R)               |
| 5HT3B_HUMAN  | chembl | Q0VJC3 | 5-hydroxytryptamine (serotonin) receptor 3B precursor [Homo sapiens]                                            |
| 5HT3B_MOUSE  | chembl | Q9JHJ5 | 5-hydroxytryptamine (serotonin) receptor 3B precursor [Mus musculus]                                            |
| 5HT3B_RAT    | chembl | Q9JJ16 | 5-hydroxytryptamine (serotonin) receptor 3b [Rattus norvegicus]                                                 |
| 5HT3C_HUMAN  | chembl | A2RRR5 | 5-hydroxytryptamine receptor 3 subunit C [Homo sapiens]                                                         |
| 5HT3D_HUMAN  | chembl | Q70Z44 | 5-hydroxytryptamine receptor 3 subunit D [Homo sapiens]                                                         |
| 5HT3E_HUMAN  | chembl | A5X5Y0 | 5-hydroxytryptamine receptor 3 subunit E [Homo sapiens]                                                         |
| 5HT4R_HUMAN  | chembl | Q9UQR6 | 5-hydroxytryptamine 4 receptor (5-HT-4) (Serotonin receptor 4) (5-HT4)                                          |
| 5HT4R_RAT    | chembl | Q62758 | 5-hydroxytryptamine 4 receptor (5-HT-4) (Serotonin receptor 4) (5-HT4)                                          |
| 5HT5A_MOUSE  | chembl | P30966 | 5-hydroxytryptamine 5A receptor (5-HT-5A) (Serotonin receptor 5A) (5-HT-5)                                      |
| 5HT5A_RAT    | chembl | P35364 | 5-hydroxytryptamine 5A receptor (5-HT-5A) (Serotonin receptor 5A) (REC17)                                       |
| 5HT5B_RAT    | chembl | P35365 | 5-hydroxytryptamine 5B receptor (5-HT-5B) (Serotonin receptor 5B) (MR22)                                        |
| 5HT6R_RAT    | chembl | P31388 | 5-hydroxytryptamine 6 receptor (5-HT-6) (Serotonin receptor 6) (ST-B17)                                         |
| 5HT7R_RAT    | chembl | P32305 | 5-hydroxytryptamine 7 receptor (5-HT-7) (Serotonin receptor 7) (5-HT-X) (5HT7) (GPRFO)                          |
| 6PGD_HUMAN   | chembl | P52209 | 6-phosphogluconate dehydrogenase, decarboxylating                                                               |
| A2AMW3_MOUSE | chembl | A2AMW3 | gamma-aminobutyric acid (GABA-A) receptor,                                                                      |

|              |        |        |                                                                                                                                                                      |
|--------------|--------|--------|----------------------------------------------------------------------------------------------------------------------------------------------------------------------|
| A85C_MYCTU   | chembl | P96806 | subunit epsilon [Mus musculus]<br>Antigen 85-C precursor (85C) (Antigen 85 complex C) (Ag85C) (Mycolyl transferase 85C) (Fibronectin-binding protein C)              |
| A8K327_HUMAN | chembl | A8K327 | sialidase 3 [Homo sapiens]                                                                                                                                           |
| AA1R_BOVIN   | chembl | Q58D38 | Adenosine A1 receptor                                                                                                                                                |
| AA1R_CHICK   | chembl | P49892 | Adenosine A1 receptor                                                                                                                                                |
| AA1R_RAT     | chembl | P25099 | Adenosine A1 receptor                                                                                                                                                |
| AA2AR_CAVPO  | chembl | P46616 | Adenosine A2a receptor                                                                                                                                               |
| AA2AR_HUMAN  | chembl | P29274 | Adenosine A2a receptor                                                                                                                                               |
| AA2AR_MOUSE  | chembl | Q60613 | Adenosine A2a receptor                                                                                                                                               |
| AA2BR_RAT    | chembl | P29276 | Adenosine A2b receptor                                                                                                                                               |
| AA3R_HUMAN   | chembl | Q6UWU0 | Adenosine A3 receptor                                                                                                                                                |
| AAK1_HUMAN   | chembl | Q4ZFZ3 | AP2 associated kinase 1 [Homo sapiens]                                                                                                                               |
| ABCC8_HUMAN  | chembl | O75948 | Sulfonylurea receptor 1                                                                                                                                              |
| ABCC9_HUMAN  | chembl | O60707 | Sulfonylurea receptor 2                                                                                                                                              |
| ABL1_HUMAN   | chembl | Q17R61 | Proto-oncogene tyrosine-protein kinase ABL1 (p150) (c-ABL)                                                                                                           |
| ABL2_HUMAN   | chembl | Q5W0C5 | Tyrosine-protein kinase ABL2 (Tyrosine kinase ARG)                                                                                                                   |
| ABP1_HUMAN   | chembl | Q16683 | Amiloride-sensitive amine oxidase [copper-containing] precursor (Diamine oxidase) (DAO) (Amiloride-binding protein) (ABP) (Histaminase) (Kidney amine oxidase) (KAO) |
| ABP1_RAT     | chembl | P36633 | Amiloride-sensitive amine oxidase [copper-containing] precursor (Diamine oxidase) (DAO) (Amiloride-binding protein) (ABP) (Histaminase)                              |
| ACACA_HUMAN  | chembl | Q13085 | Acetyl-CoA carboxylase 1 (ACC-alpha) () (Biotin carboxylase)                                                                                                         |
| ACACB_HUMAN  | chembl | O00763 | Acetyl-CoA carboxylase 2 (ACC-beta) () (Biotin carboxylase)                                                                                                          |
| ACE2_HUMAN   | chembl | Q9UFZ6 | angiotensin I converting enzyme 2 precursor [Homo sapiens]                                                                                                           |
| ACES_ELEEL   | chembl | O42275 | Acetylcholinesterase precursor (AChE)                                                                                                                                |
| ACES_HUMAN   | chembl | B7ZKZ0 | Acetylcholinesterase precursor (AChE)                                                                                                                                |
| ACES_MOUSE   | chembl | P21836 | Acetylcholinesterase precursor (AChE)                                                                                                                                |
| ACES_RAT     | chembl | P37136 | Acetylcholinesterase precursor (AChE)                                                                                                                                |
| ACES_TORCA   | chembl | P04058 | Acetylcholinesterase precursor (AChE)                                                                                                                                |
| ACE_MOUSE    | chembl | P22967 | Angiotensin-converting enzyme, somatic isoform                                                                                                                       |

|             |        |        |                                                                                                                                        |
|-------------|--------|--------|----------------------------------------------------------------------------------------------------------------------------------------|
| ACE_RABIT   | chembl | P12822 | precursor (ACE) (Dipeptidyl carboxypeptidase I) (Kininase II)<br>Angiotensin-converting enzyme, somatic isoform                        |
| ACE_RAT     | chembl | Q8CFN1 | precursor (ACE) (Dipeptidyl carboxypeptidase I) (Kininase II)<br>Angiotensin-converting enzyme, somatic isoform                        |
| ACH10_RAT   | chembl | Q9JLB5 | precursor (ACE) (Dipeptidyl carboxypeptidase I) (Kininase II)<br>neuronal nicotinic acetylcholine receptor subunit [Rattus norvegicus] |
| ACHA2_HUMAN | chembl | Q15822 | Neuronal acetylcholine receptor protein, alpha-2 chain precursor                                                                       |
| ACHA2_RAT   | chembl | O08952 | Neuronal acetylcholine receptor protein, alpha-2 chain precursor                                                                       |
| ACHA3_HUMAN | chembl | Q15823 | Neuronal acetylcholine receptor protein, alpha-3 chain precursor                                                                       |
| ACHA3_RAT   | chembl | P04757 | Neuronal acetylcholine receptor protein, alpha-3 chain precursor                                                                       |
| ACHA4_HUMAN | chembl | Q4VAQ6 | Neuronal acetylcholine receptor protein, alpha-4 chain precursor                                                                       |
| ACHA4_MOUSE | chembl | O70174 | Neuronal acetylcholine receptor protein, alpha-4 chain precursor                                                                       |
| ACHA4_RAT   | chembl | P09483 | Neuronal acetylcholine receptor protein, alpha-4 chain precursor                                                                       |
| ACHA5_RAT   | chembl | P20420 | Neuronal acetylcholine receptor protein, alpha-5 chain precursor                                                                       |
| ACHA6_RAT   | chembl | P43143 | Neuronal acetylcholine receptor protein, alpha-6 chain precursor                                                                       |
| ACHA7_HUMAN | chembl | Q99555 | Neuronal acetylcholine receptor protein, alpha-7 chain precursor                                                                       |
| ACHA7_MOUSE | chembl | P49582 | Neuronal acetylcholine receptor protein, alpha-7 chain precursor                                                                       |
| ACHA9_RAT   | chembl | Q6PW49 | Neuronal acetylcholine receptor protein, alpha-9 chain precursor                                                                       |
| ACHA_HUMAN  | chembl | B4DRV6 | Acetylcholine receptor protein, alpha chain precursor                                                                                  |
| ACHA_RAT    | chembl | P25108 | Acetylcholine receptor protein, alpha chain precursor                                                                                  |
| ACHA_TORCA  | chembl | P02710 | Acetylcholine receptor protein, alpha chain precursor                                                                                  |

|             |        |        |                                                                                                                                 |
|-------------|--------|--------|---------------------------------------------------------------------------------------------------------------------------------|
| ACHB2_HUMAN | chembl | P17787 | Neuronal acetylcholine receptor protein, beta-2 chain precursor                                                                 |
| ACHB2_RAT   | chembl | Q53YK1 | Neuronal acetylcholine receptor protein, beta-2 chain precursor (Neuronal acetylcholine receptor non-alpha-1 chain) (N-alpha 1) |
| ACHB3_HUMAN | chembl | Q15827 | Neuronal acetylcholine receptor protein, beta-3 chain precursor                                                                 |
| ACHB3_RAT   | chembl | P12391 | Neuronal acetylcholine receptor protein, beta-3 chain precursor                                                                 |
| ACHB4_HUMAN | chembl | Q9BQR4 | Neuronal acetylcholine receptor protein, beta-4 chain precursor                                                                 |
| ACHB4_RAT   | chembl | P12392 | Neuronal acetylcholine receptor protein, beta-4 chain precursor (Neuronal acetylcholine receptor non-alpha-2 chain) (N-alpha 2) |
| ACHB_HUMAN  | chembl | Q96FB8 | Acetylcholine receptor protein, beta chain precursor                                                                            |
| ACHB_RAT    | chembl | P25109 | Acetylcholine receptor protein, beta chain precursor                                                                            |
| ACHB_TORCA  | chembl | P02712 | Acetylcholine receptor protein, beta chain precursor                                                                            |
| ACHD_HUMAN  | chembl | Q07001 | Acetylcholine receptor protein, delta chain precursor                                                                           |
| ACHD_TORCA  | chembl | P02718 | Acetylcholine receptor protein, delta chain precursor                                                                           |
| ACHG_HUMAN  | chembl | B3KWM8 | Acetylcholine receptor protein, gamma chain precursor                                                                           |
| ACHG_TORCA  | chembl | P02714 | Acetylcholine receptor protein, gamma chain precursor                                                                           |
| ACK1_HUMAN  | chembl | Q07912 | Activated CDC42 kinase 1 (EC 2.7.10.2) (ACK-1) (Tyrosine kinase non- receptor protein 2).                                       |
| ACLY_HUMAN  | chembl | Q13037 | ATP-citrate synthase (ATP-citrate (pro-S)-lyase) (Citrate cleavage enzyme)                                                      |
| ACM1_MOUSE  | chembl | P12657 | Muscarinic acetylcholine receptor M1                                                                                            |
| ACM1_RAT    | chembl | P08482 | Muscarinic acetylcholine receptor M1                                                                                            |
| ACM2_MOUSE  | chembl | Q9ERZ4 | Muscarinic acetylcholine receptor M2                                                                                            |
| ACM2_RAT    | chembl | Q9Z2Z1 | Muscarinic acetylcholine receptor M2                                                                                            |
| ACM3_RAT    | chembl | P08483 | Muscarinic acetylcholine receptor M3                                                                                            |
| ACM4_RAT    | chembl | P08485 | Muscarinic acetylcholine receptor M4                                                                                            |
| ACM5_RAT    | chembl | P08911 | Muscarinic acetylcholine receptor M5                                                                                            |
| ACPS_BACSU  | chembl | P96618 | Holo-[acyl-carrier-protein] synthase (Holo-ACP synthase) (4-phosphopantetheinyl transferase acpS)                               |

|             |        |        |                                                                                                                                                                        |
|-------------|--------|--------|------------------------------------------------------------------------------------------------------------------------------------------------------------------------|
| ADA10_HUMAN | chembl | Q92650 | ADAM 10 precursor (A disintegrin and metalloproteinase domain 10) (Mammalian disintegrin-metalloprotease) (Kuzbanian protein homolog)                                  |
| ADA12_HUMAN | chembl | Q6P9E3 | ADAM 12 precursor (A disintegrin and metalloproteinase domain 12) (Meltrin alpha)                                                                                      |
| ADA17_HUMAN | chembl | O60226 | ADAM 17 precursor (A disintegrin and metalloproteinase domain 17) (TNF-alpha converting enzyme) (TNF-alpha convertase) (Snake venom-like protease) (CD156b antigen)    |
| ADA17_PIG   | chembl | O77636 | ADAM 17 (A disintegrin and metalloproteinase domain 17) (TNF-alpha converting enzyme) (TNF-alpha convertase)                                                           |
| ADA17_RAT   | chembl | Q9Z1K9 | ADAM 17 precursor (A disintegrin and metalloproteinase domain 17) (TNF-alpha converting enzyme) (TNF-alpha convertase)                                                 |
| ADA1A_BOVIN | chembl | P18130 | Alpha-1A adrenergic receptor (Alpha 1A-adrenoceptor) (Alpha 1A-adrenoreceptor) (Alpha-1C adrenergic receptor)                                                          |
| ADA1B_MESAU | chembl | P18841 | Alpha-1B adrenergic receptor (Alpha 1B-adrenoceptor) (Alpha 1B-adrenoreceptor)                                                                                         |
| ADA1B_RAT   | chembl | Q63215 | Alpha-1B adrenergic receptor (Alpha 1B-adrenoceptor) (Alpha 1B-adrenoreceptor)                                                                                         |
| ADA1D_RAT   | chembl | Q71UM4 | Alpha-1D adrenergic receptor (Alpha 1D-adrenoceptor) (Alpha 1D-adrenoreceptor) (Alpha-1A adrenergic receptor) (RA42)                                                   |
| ADA2A_BOVIN | chembl | Q28838 | Alpha-2A adrenergic receptor (Alpha-2A adrenoceptor) (Alpha-2A adrenoreceptor) (Alpha-2AAR) (Alpha-2D adrenergic receptor)                                             |
| ADA2B_BOVIN | chembl | O77700 | Alpha-2B adrenergic receptor (Alpha-2B adrenoceptor) (Alpha-2B adrenoreceptor)                                                                                         |
| ADA2B_RAT   | chembl | Q925E4 | Alpha-2B adrenergic receptor (Alpha-2B adrenoceptor) (Alpha-2B adrenoreceptor)                                                                                         |
| ADA2C_RAT   | chembl | P22086 | Alpha-2C adrenergic receptor (Alpha-2C adrenoceptor) (Alpha-2C adrenoreceptor) (Subtype C4)                                                                            |
| ADAM9_HUMAN | chembl | Q8NFM6 | ADAM 9 precursor (A disintegrin and metalloproteinase domain 9) (Metalloprotease/disintegrin/cysteine-rich protein 9) (Myeloma cell metalloproteinase) (Meltrin gamma) |

|             |        |        |                                                                                                                                |
|-------------|--------|--------|--------------------------------------------------------------------------------------------------------------------------------|
| ADA_HUMAN   | chembl | P00813 | (Cellular disintegrin-related protein)                                                                                         |
| ADCY1_HUMAN | chembl | Q08828 | Adenosine deaminase (Adenosine aminohydrolase)                                                                                 |
| ADCY2_HUMAN | chembl | Q9UPU2 | brain adenylate cyclase 1 [Homo sapiens]                                                                                       |
| ADCY2_RAT   | chembl | P26769 | Adenylate cyclase, type II (ATP pyrophosphate-lyase 2) (Adenylyl cyclase 2)                                                    |
| ADCY3_HUMAN | chembl | O60266 | Adenylate cyclase, type II (ATP pyrophosphate-lyase 2) (Adenylyl cyclase 2)                                                    |
| ADCY3_RAT   | chembl | P21932 | Adenylate cyclase type III (Adenylate cyclase, olfactive type) (ATP pyrophosphate-lyase 3) (Adenylyl cyclase 3) (AC-III) (AC3) |
| ADCY4_HUMAN | chembl | Q8NFM4 | Adenylate cyclase type III (Adenylate cyclase, olfactive type) (ATP pyrophosphate-lyase 3) (Adenylyl cyclase 3) (AC-III) (AC3) |
| ADCY4_RAT   | chembl | P26770 | Adenylate cyclase, type IV (ATP pyrophosphate-lyase 4) (Adenylyl cyclase 4)                                                    |
| ADCY5_RAT   | chembl | Q04400 | Adenylate cyclase, type IV (ATP pyrophosphate-lyase 4) (Adenylyl cyclase 4)                                                    |
| ADCY6_HUMAN | chembl | Q9NR75 | Adenylate cyclase, type V (ATP pyrophosphate-lyase 5) (Adenylyl cyclase 5)                                                     |
| ADCY6_RAT   | chembl | Q03343 | Adenylate cyclase, type VI (ATP pyrophosphate-lyase 6) (Ca(2+)-inhibitable adenylyl cyclase)                                   |
| ADCY7_HUMAN | chembl | A0AVA6 | Adenylate cyclase, type VI (ATP pyrophosphate-lyase 6) (Ca(2+)-inhibitable adenylyl cyclase)                                   |
| ADCY8_HUMAN | chembl | P40145 | Adenylate cyclase, type VII (ATP pyrophosphate-lyase 7) (Adenylyl cyclase 7)                                                   |
| ADCY8_RAT   | chembl | P40146 | Adenylate cyclase, type VIII (ATP pyrophosphate-lyase 8) (Ca(2+)/calmodulin activated adenylyl cyclase)                        |
| ADCY9_HUMAN | chembl | O60273 | Adenylate cyclase, type VIII (ATP pyrophosphate-lyase 8) (Ca(2+)/calmodulin activated adenylyl cyclase)                        |
| ADH1S_HORSE | chembl | P00328 | Adenylate cyclase, type IX (ATP pyrophosphate-lyase 9) (Adenylyl cyclase 9)                                                    |
| ADK_RAT     | chembl | Q64640 | Alcohol dehydrogenase S chain                                                                                                  |
| ADRB1_HUMAN | chembl | Q9UKG8 | Adenosine kinase (AK) (Adenosine 5-phosphotransferase)                                                                         |
| ADRB1_RAT   | chembl | P18090 | Beta-1 adrenergic receptor (Beta-1 adrenoceptor) (Beta-1 adrenoreceptor)                                                       |
|             |        |        | Beta-1 adrenergic receptor (Beta-1 adrenoceptor) (Beta-1 adrenoreceptor)                                                       |



|             |        |        |                                                                                                                                                                                                                                                             |
|-------------|--------|--------|-------------------------------------------------------------------------------------------------------------------------------------------------------------------------------------------------------------------------------------------------------------|
| ADRB2_BOVIN | chembl | Q28044 | Beta-2 adrenergic receptor (Beta-2 adrenoceptor) (Beta-2 adrenoreceptor)                                                                                                                                                                                    |
| ADRB2_CANFA | chembl | P54833 | Beta-2 adrenergic receptor (Beta-2 adrenoceptor) (Beta-2 adrenoreceptor)                                                                                                                                                                                    |
| ADRB2_HUMAN | chembl | Q9UMZ5 | Beta-2 adrenergic receptor (Beta-2 adrenoceptor) (Beta-2 adrenoreceptor)                                                                                                                                                                                    |
| ADRB2_MOUSE | chembl | P18762 | Beta-2 adrenergic receptor (Beta-2 adrenoceptor) (Beta-2 adrenoreceptor)                                                                                                                                                                                    |
| ADRB3_RAT   | chembl | P26255 | Beta-3 adrenergic receptor (Beta-3 adrenoceptor) (Beta-3 adrenoreceptor)                                                                                                                                                                                    |
| AGTR1_BOVIN | chembl | P25104 | Type-1 angiotensin II receptor (AT1)                                                                                                                                                                                                                        |
| AGTR1_RABIT | chembl | P34976 | Type-1 angiotensin II receptor (AT1)                                                                                                                                                                                                                        |
| AGTR2_HUMAN | chembl | Q6FGY7 | Type-2 angiotensin II receptor (AT2)                                                                                                                                                                                                                        |
| AGTRA_RAT   | chembl | Q9QVS5 | Type-1 angiotensin II receptor (AT1) (AT1A)                                                                                                                                                                                                                 |
| AGTRB_RAT   | chembl | P29089 | Type-1B angiotensin II receptor (AT1B) (AT3)                                                                                                                                                                                                                |
| AHR_RABIT   | chembl | O02747 | Ah receptor (Aryl hydrocarbon receptor) (AhR)                                                                                                                                                                                                               |
| AK1A1_HUMAN | chembl | A8KAL8 | Alcohol dehydrogenase [NADP+] (Aldehyde reductase) (Aldo-keto reductase family 1 member A1)                                                                                                                                                                 |
| AK1A1_PIG   | chembl | P50578 | Alcohol dehydrogenase [NADP+] (Aldehyde reductase) (Aldo-keto reductase family 1 member A1)                                                                                                                                                                 |
| AK1A1_RAT   | chembl | P51635 | Alcohol dehydrogenase [NADP+] (Aldehyde reductase) (Aldo-keto reductase family 1 member A1) (3-DG-reducing enzyme)                                                                                                                                          |
| AKAP1_HUMAN | chembl | Q9BW14 | A kinase anchor protein 1, mitochondrial precursor (Protein kinase A anchoring protein 1) (PRKA1) (A-kinase anchor protein 149 kDa) (AKAP 149) (Dual specificity A-kinase anchoring protein 1) (D-AKAP-1) (Spermatid A-kinase anchor protein 84) (S-AKAP84) |
| AKAP2_HUMAN | chembl | B2RTU4 | A-kinase anchor protein 2 (Protein kinase A anchoring protein 2) (PRKA2) (AKAP-2)                                                                                                                                                                           |
| AKT1_HUMAN  | chembl | P31749 | RAC-alpha serine/threonine-protein kinase (RAC-PK-alpha) (Protein kinase B) (PKB) (C-AKT)                                                                                                                                                                   |
| AKT3_HUMAN  | chembl | Q0VAA6 | RAC-gamma serine/threonine-protein kinase (RAC-PK-gamma) (Protein kinase Akt-3) (Protein kinase B, gamma) (PKB gamma) (STK-2)                                                                                                                               |
| ALBU_HUMAN  | chembl | Q645G4 | Serum albumin precursor                                                                                                                                                                                                                                     |
| ALDH2_HUMAN | chembl | Q03639 | Aldehyde dehydrogenase, mitochondrial precursor                                                                                                                                                                                                             |

|             |        |         |                                                                                                                                                    |
|-------------|--------|---------|----------------------------------------------------------------------------------------------------------------------------------------------------|
| ALDR_HUMAN  | chembl | Q5U031  | (ALDH class 2) (ALDHI) (ALDH-E2)                                                                                                                   |
| ALDR_PIG    | chembl | P80276  | Aldose reductase (AR) (Aldehyde reductase)                                                                                                         |
| AMPB_HUMAN  | chembl | Q9BVM9  | Aldose reductase (AR) (Aldehyde reductase)                                                                                                         |
| AMPC_ECOLI  | chembl | P00811  | Aminopeptidase B (Ap-B) (Arginyl aminopeptidase)                                                                                                   |
| AMPC_ENTCL  | chembl | P05364  | (Arginine aminopeptidase)                                                                                                                          |
| AMPC_PSEAE  | chembl | P24735  | Beta-lactamase precursor (Cephalosporinase)                                                                                                        |
| AMPD1_HUMAN | chembl | P23109  | Beta-lactamase precursor (Cephalosporinase)                                                                                                        |
| AMPD3_HUMAN | chembl | Q01432  | Beta-lactamase precursor (Cephalosporinase)                                                                                                        |
| AMPE_HUMAN  | chembl | Q07075  | AMP deaminase 1 (Myoadenylate deaminase)                                                                                                           |
| AMPE_PIG    | chembl | Q95334  | (AMP deaminase isoform M)                                                                                                                          |
| AMPH_ECOLI  | chembl | P46127  | AMP deaminase 3 (AMP deaminase isoform E)                                                                                                          |
| AMPL_HUMAN  | chembl | B3KMQ3  | (Erythrocyte AMP deaminase)                                                                                                                        |
| AMPM1_HUMAN | chembl | B4E2E6  | Glutamyl aminopeptidase (EAP) (Aminopeptidase A) (APA) (Differentiation antigen gp160)                                                             |
| AMPM1_YEAST | chembl | Q01662  | Glutamyl aminopeptidase (EAP) (Aminopeptidase A) (APA)                                                                                             |
| AMPN_HUMAN  | chembl | Q8IUUK3 | Penicillin-binding protein ampH                                                                                                                    |
| AMPN_PIG    | chembl | Q29242  | Cytosol aminopeptidase (Leucine aminopeptidase) (LAP) (Leucyl aminopeptidase) (Proline aminopeptidase) (EC 3.4.11.5) (Prolyl aminopeptidase)       |
| AMYP_RAT    | chembl | P00689  | Methionine aminopeptidase 1 (MetAP 1) (MAP 1) (Peptidase M 1)                                                                                      |
| ANDR_HUMAN  | chembl | B1AKD7  | Methionine aminopeptidase 1 precursor (MetAP 1) (MAP 1) (Peptidase M 1)                                                                            |
| ANPRC_HUMAN | chembl | A2RRD1  | Aminopeptidase N (hAPN) (Alanyl aminopeptidase) (Microsomal aminopeptidase) (Aminopeptidase M) (gp150) (Myeloid plasma membrane glycoprotein CD13) |
| AOC2_HUMAN  | chembl | O75105  | Aminopeptidase N (pAPN) (Alanyl aminopeptidase) (Microsomal aminopeptidase) (Aminopeptidase M) (CD13) (gp130)                                      |
|             |        |         | Pancreatic alpha-amylase precursor (PA) (1,4-alpha-D-glucan glucanohydrolase)                                                                      |
|             |        |         | Androgen receptor (Dihydrotestosterone receptor)                                                                                                   |
|             |        |         | Atrial natriuretic peptide clearance receptor precursor (ANP-C) (ANPRC) (NPR-C) (Atrial natriuretic peptide C-type receptor)                       |
|             |        |         | Retina-specific copper amine oxidase precursor (RAO) (Amine oxidase [copper-containing])                                                           |

|             |        |        |                                                                                                                    |
|-------------|--------|--------|--------------------------------------------------------------------------------------------------------------------|
| AOC3_BOVIN  | chembl | Q9TTK6 | amine oxidase, copper containing 3 (vascular adhesion protein 1) [Bos taurus]                                      |
| AOC3_HUMAN  | chembl | B2RCI5 | Membrane copper amine oxidase (Vascular adhesion protein-1) (VAP-1) (HPAO)                                         |
| AOC3_RAT    | chembl | O08590 | Semicarbazide-sensitive amine oxidase                                                                              |
| AOFA_BOVIN  | chembl | P21398 | Amine oxidase [flavin-containing] A (Monoamine oxidase) (MAO-A)                                                    |
| AOFA_HUMAN  | chembl | Q16426 | Amine oxidase [flavin-containing] A (Monoamine oxidase) (MAO-A)                                                    |
| AOFB_HUMAN  | chembl | B2R6R3 | Amine oxidase [flavin-containing] B (Monoamine oxidase) (MAO-B)                                                    |
| AOFB_RAT    | chembl | P19643 | Amine oxidase [flavin-containing] B (Monoamine oxidase) (MAO-B)                                                    |
| APOB_HUMAN  | chembl | Q13787 | Apolipoprotein B-100 precursor (Apo B-100) [Contains: (Apolipoprotein B-48) (Apo B-48) ]                           |
| AROA_ECOLI  | chembl | P78222 | 3-phosphoshikimate 1-carboxyvinyltransferase (5-enolpyruvylshikimate-3-phosphate synthase) (EPSP synthase) (EPSPS) |
| AROB_ECOLI  | chembl | P07639 | 3-dehydroquinase synthase                                                                                          |
| AROQ_MYCTU  | chembl | P0A4Z6 | 3-dehydroquinase dehydratase (3-dehydroquinase) (Type II DHQase)                                                   |
| ASND1_HUMAN | chembl | Q4ZG45 | HCV NS3-transactivated protein 1 [Homo sapiens]                                                                    |
| AT12A_HUMAN | chembl | Q13816 | Potassium-transporting ATPase alpha chain 2 (Proton pump) (Non-gastric H(+)/K(+) ATPase alpha subunit)             |
| AT1A1_HUMAN | chembl | B2RBR6 | Sodium/potassium-transporting ATPase alpha-1 chain precursor (Sodium pump 1) (Na+/K+ ATPase 1)                     |
| AT1A2_HUMAN | chembl | Q07059 | Sodium/potassium-transporting ATPase alpha-2 chain precursor (Sodium pump 2) (Na+/K+ ATPase 2)                     |
| AT1A3_HUMAN | chembl | Q16735 | Sodium/potassium-transporting ATPase alpha-3 chain (Sodium pump 3) (Na+/K+ ATPase 3) (Alpha(III))                  |
| AT1A4_HUMAN | chembl | Q13733 | Sodium/potassium-transporting ATPase alpha-4 chain (Sodium pump 4) (Na+/K+ ATPase 4)                               |
| AT1B1_HUMAN | chembl | P05026 | Sodium/potassium-transporting ATPase beta-1 chain (Sodium/potassium-dependent ATPase beta-1 subunit)               |
| AT1B1_PIG   | chembl | P05027 | Sodium/potassium-transporting ATPase beta-1                                                                        |

|             |        |        |                                                                                                                                                                                                                                                   |
|-------------|--------|--------|---------------------------------------------------------------------------------------------------------------------------------------------------------------------------------------------------------------------------------------------------|
| AT1B2_HUMAN | chembl | P14415 | chain (Sodium/potassium-dependent ATPase beta-1 subunit)                                                                                                                                                                                          |
| AT1B3_HUMAN | chembl | P54709 | Sodium/potassium-transporting ATPase beta-2 chain (Sodium/potassium-dependent ATPase beta-2 subunit)                                                                                                                                              |
| AT2A1_HUMAN | chembl | O14983 | Sodium/potassium-transporting ATPase beta-3 chain (Sodium/potassium-dependent ATPase beta-3 subunit) (ATPB-3)                                                                                                                                     |
| AT2A2_HUMAN | chembl | P16615 | Sarcoplasmic/endoplasmic reticulum calcium ATPase 1 (Calcium pump 1) (SERCA1) (SR Ca(2+)-ATPase 1) (Calcium-transporting ATPase sarcoplasmic reticulum type, fast twitch skeletal muscle isoform) (Endoplasmic reticulum class 1/2 Ca(2+) ATPase) |
| ATF1_HUMAN  | chembl | P25168 | Sarcoplasmic/endoplasmic reticulum calcium ATPase 2 (Calcium pump 2) (SERCA2) (SR Ca(2+)-ATPase 2) (Calcium-transporting ATPase sarcoplasmic reticulum type, slow twitch skeletal muscle isoform) (Endoplasmic reticulum class 1/2 Ca(2+) ATPase) |
| ATM_HUMAN   | chembl | Q9UCX7 | Cyclic-AMP-dependent transcription factor ATF-1 (Activating transcription factor 1) (TREB36 protein)                                                                                                                                              |
| ATNG_HUMAN  | chembl | Q15332 | Serine-protein kinase ATM (Ataxia telangiectasia mutated) (A-T, mutated)                                                                                                                                                                          |
| ATP4A_HUMAN | chembl | O00738 | Sodium/potassium-transporting ATPase gamma chain (Sodium pump gamma chain) (Na+/K+ ATPase gamma subunit) (FXFD domain-containing ion transport regulator 2)                                                                                       |
| ATP4A_RAT   | chembl | P70511 | Potassium-transporting ATPase alpha chain 1 (Proton pump) (Gastric H+/K+ ATPase alpha subunit)                                                                                                                                                    |
| ATP4B_HUMAN | chembl | P51164 | Potassium-transporting ATPase alpha chain 1 (Proton pump) (Gastric H+/K+ ATPase alpha subunit)                                                                                                                                                    |
| ATP4B_PIG   | chembl | P18434 | Potassium-transporting ATPase beta chain (Proton pump beta chain) (Gastric H+/K+ ATPase beta subunit)                                                                                                                                             |
|             |        |        | Potassium-transporting ATPase beta chain (Proton pump beta chain) (Gastric H+/K+ ATPase beta subunit) (gp60-90)                                                                                                                                   |

|             |        |            |                                                                                                                                                    |
|-------------|--------|------------|----------------------------------------------------------------------------------------------------------------------------------------------------|
| ATP4B_RAT   | chembl | P18598     | Potassium-transporting ATPase beta chain (Proton pump beta chain) (Gastric H+/K+ ATPase beta subunit)                                              |
| ATS4_BOVIN  | chembl | Q9TT93     | a disintegrin-like and metalloprotease (reprolysin type) with thrombospondin type 1 motif, 4 [Bos taurus]                                          |
| ATS5_BOVIN  | chembl | Q9TT92     | ADAMTS-5 (A disintegrin and metalloproteinase with thrombospondin motifs 5) (ADAM-TS 5) (ADAM-TS5) (Aggrecanase-2) (ADMP-2) (ADAM-TS 11)           |
| ATS5_HUMAN  | chembl | Q9UNA0     | ADAMTS-5 precursor (A disintegrin and metalloproteinase with thrombospondin motifs 5) (ADAM-TS 5) (ADAM-TS5) (Aggrecanase-2) (ADMP-2) (ADAM-TS 11) |
| AURKC_HUMAN | chembl | Q9UQB9     | Serine/threonine-protein kinase 13 (Aurora/Ipl1/Eg2 protein 2) (Aurora/Ipl1-related kinase 3) (Aurora-C)                                           |
| B2CL1_HUMAN | chembl | Q07817     | Apoptosis regulator Bcl-X (Bcl-2-like 1 protein)                                                                                                   |
| B2CL2_HUMAN | chembl | Q92843     | Apoptosis regulator Bcl-W (Bcl-2-like 2 protein).                                                                                                  |
| BCAT1_HUMAN | chembl | Q96MY9     | Branched-chain-amino-acid aminotransferase, cytosolic (EC 2.6.1.42) (BCAT(c)) (ECA39 protein).                                                     |
| BCL2_HUMAN  | chembl | P10415     | Apoptosis regulator Bcl-2                                                                                                                          |
| BCR_HUMAN   | chembl | Q4LE80     | Breakpoint cluster region protein                                                                                                                  |
| BGAL_HUMAN  | chembl | B2R7H8     | Beta-galactosidase precursor (Lactase) (Acid beta-galactosidase)                                                                                   |
| BGLS_AGRTU  | chembl | BGLS_AGRTU | Beta-glucosidase (EC 3.2.1.21) (Gentiobiase) (Cellobiase) (Beta-D- glucoside glucohydrolase).                                                      |
| BHMT1_HUMAN | chembl | Q93088     | Betaine--homocysteine S-methyltransferase 1 (EC 2.1.1.5).                                                                                          |
| BKRB1_HUMAN | chembl | P46663     | B1 bradykinin receptor (BK-1 receptor) (B1R)                                                                                                       |
| BKRB1_RABIT | chembl | P48748     | B1 bradykinin receptor (BK-1 receptor) (B1R)                                                                                                       |
| BKRB1_RAT   | chembl | P97583     | B1 bradykinin receptor (BK-1 receptor) (B1R) (Kinin B1 receptor) (KB1)                                                                             |
| BKRB2_HUMAN | chembl | P30411     | B2 bradykinin receptor (BK-2 receptor) (B2R)                                                                                                       |
| BLA1_STEMA  | chembl | P52700     | Metallo-beta-lactamase L1 precursor (Beta-lactamase type II) (EC 3.5.2.6) (Penicillinase).                                                         |
| BLAB_BACFR  | chembl | P25910     | Beta-lactamase, type II precursor (Penicillinase) (Cephalosporinase) (Imipenem-cefoxitin hydrolyzing enzyme)                                       |
| BLAC_STAAU  | chembl | P00807     | Beta-lactamase precursor (Penicillinase)                                                                                                           |
| BLAN_ENTCL  | chembl | P52663     | Imipenem-hydrolyzing beta-lactamase precursor                                                                                                      |

|             |        |        |                                                                                                                                                                                           |
|-------------|--------|--------|-------------------------------------------------------------------------------------------------------------------------------------------------------------------------------------------|
| BLAT_ECOLX  | chembl | P62593 | (EC 3.5.2.6) (Carbapenemase) (NMC-A).<br>Beta-lactamase TEM precursor (TEM-1) (TEM-2) (TEM-3) (TEM-4) (TEM-5) (TEM-6) (TEM-8/CAZ-2) (TEM-16/CAZ-7) (TEM-24/CAZ-6) (IRT-4) (Penicillinase) |
| BLK_HUMAN   | chembl | P51451 | Tyrosine-protein kinase BLK (B lymphocyte kinase) (p55-BLK)                                                                                                                               |
| BMP1_HUMAN  | chembl | Q13872 | Bone morphogenetic protein 1 precursor (BMP-1) (Procollagen C-proteinase) (PCP) (Mammalian tolloid protein) (mTld)                                                                        |
| BMP2K_HUMAN | chembl | Q9NTG8 | BMP-2-inducible protein kinase (EC 2.7.11.1) (BIKe).                                                                                                                                      |
| BTK_HUMAN   | chembl | Q06187 | Tyrosine-protein kinase BTK (Brutons tyrosine kinase) (Agammaglobulinaemia tyrosine kinase) (ATK) (B cell progenitor kinase) (BPK)                                                        |
| C11B1_HUMAN | chembl | Q9UML2 | Cytochrome P450 11B1, mitochondrial precursor (CYPXIB1) (P450C11) (P-450c11) (Steroid 11-beta-hydroxylase)                                                                                |
| C11B2_HUMAN | chembl | P19099 | Cytochrome P450 11B2, mitochondrial precursor (EC 1.14.15.5) (CYPXIB2) (P-450Aldo) (Aldosterone synthase) (ALDOS) (Aldosterone-synthesizing enzyme) (Steroid 18-hydroxylase) (P-450C18)   |
| C1S_HUMAN   | chembl | Q9UCV2 | Complement C1s subcomponent precursor (C1 esterase)                                                                                                                                       |
| C3AR_HUMAN  | chembl | O43771 | C3a anaphylatoxin chemotactic receptor (C3a-R) (C3AR)                                                                                                                                     |
| CA2D1_HUMAN | chembl | Q9UD81 | Dihydropyridine-sensitive L-type, calcium channel alpha-2/delta subunits precursor                                                                                                        |
| CA2D1_MOUSE | chembl | O08533 | Dihydropyridine-sensitive L-type calcium channel subunits alpha- 2/delta precursor [Contains L-type calcium channel subunit alpha-2, L-type calcium channel subunit delta].               |
| CA2D1_RAT   | chembl | P54290 | Dihydropyridine-sensitive L-type, calcium channel alpha-2/delta subunits precursor                                                                                                        |
| CA2D2_HUMAN | chembl | Q9NY48 | calcium channel, voltage-dependent, alpha 2/delta subunit 2 isoform a [Homo sapiens]                                                                                                      |
| CA2D2_RAT   | chembl | Q8CFG6 | calcium channel, voltage dependent, alpha2/delta subunit 2 [Rattus norvegicus]                                                                                                            |
| CA2D3_HUMAN | chembl | Q9NY16 | calcium channel, voltage-dependent, alpha 2/delta                                                                                                                                         |

|             |        |        |                                                                                                                                                                                                                                                                                    |
|-------------|--------|--------|------------------------------------------------------------------------------------------------------------------------------------------------------------------------------------------------------------------------------------------------------------------------------------|
| CAC2D3_RAT  | chembl | Q8CFG5 | 3 subunit [Homo sapiens]<br>calcium channel, voltage-dependent, alpha 2/delta                                                                                                                                                                                                      |
| CAC1A_RAT   | chembl | P54282 | 3 subunit [Rattus norvegicus]<br>Voltage-dependent P/Q-type calcium channel<br>alpha-1A subunit (Voltage-gated calcium channel<br>alpha subunit Cav2.1) (Calcium channel, L type,<br>alpha-1 polypeptide, isoform 4) (Brain calcium<br>channel I) (BI) (RAT brain class A) (RBA-I) |
| CAC1B_RAT   | chembl | Q02294 | Voltage-dependent N-type calcium channel alpha-<br>1B subunit (Voltage-gated calcium channel alpha<br>subunit Cav2.2) (Calcium channel, L type, alpha-1<br>polypeptide isoform 5) (Brain calcium channel III)<br>(BIII)                                                            |
| CAC1C_HUMAN | chembl | Q14743 | Voltage-dependent L-type calcium channel alpha-<br>1C subunit (Voltage-gated calcium channel alpha<br>subunit Cav1.2) (Calcium channel, L type, alpha-1<br>polypeptide, isoform 1, cardiac muscle)                                                                                 |
| CAC1C_MOUSE | chembl | Q04476 | Voltage-dependent L-type calcium channel alpha-<br>1C subunit (Voltage-gated calcium channel alpha<br>subunit Cav1.2) (Calcium channel, L type, alpha-1<br>polypeptide, isoform 1, cardiac muscle) (Mouse<br>brain class C) (MBC) (MELC-CC)                                        |
| CAC1C_RABIT | chembl | Q03716 | Voltage-dependent L-type calcium channel alpha-<br>1C subunit (Voltage-gated calcium channel alpha<br>subunit Cav1.2) (Calcium channel, L type, alpha-1<br>polypeptide, isoform 1, cardiac muscle) (Smooth<br>muscle calcium channel blocker receptor) (CACB-<br>receptor)         |
| CAC1C_RAT   | chembl | P22002 | Voltage-dependent L-type calcium channel alpha-<br>1C subunit (Voltage-gated calcium channel alpha<br>subunit Cav1.2) (Calcium channel, L type, alpha-1<br>polypeptide, isoform 1, cardiac muscle) (RAT brain<br>class C) (RBC)                                                    |
| CAC1D_HUMAN | chembl | Q13931 | Voltage-dependent L-type calcium channel alpha-<br>1D subunit (Voltage-gated calcium channel alpha<br>subunit Cav1.3) (Calcium channel, L type, alpha-1<br>polypeptide, isoform 2)                                                                                                 |
| CAC1D_MOUSE | chembl | Q7TSD2 | calcium channel, voltage-dependent, L type, alpha<br>1D subunit [Mus musculus]                                                                                                                                                                                                     |
| CAC1D_RAT   | chembl | O09023 | Voltage-dependent L-type calcium channel alpha-                                                                                                                                                                                                                                    |

|             |        |        |                                                                                                                                                                                                                                                                                                                                                                               |
|-------------|--------|--------|-------------------------------------------------------------------------------------------------------------------------------------------------------------------------------------------------------------------------------------------------------------------------------------------------------------------------------------------------------------------------------|
| CAC1E_RAT   | chembl | Q07652 | 1D subunit (Voltage-gated calcium channel alpha subunit Cav1.3) (Calcium channel, L type, alpha-1 polypeptide, isoform 2) (RAT brain class D) (RBD) Voltage-dependent R-type calcium channel alpha-1E subunit (Voltage-gated calcium channel alpha subunit Cav2.3) (Calcium channel, L type, alpha-1 polypeptide, isoform 6) (RBE-II) (RBE2) (Brain calcium channel II) (BII) |
| CAC1F_HUMAN | chembl | Q9UHB1 | Voltage-dependent L-type calcium channel alpha-1F subunit (Voltage-gated calcium channel alpha subunit Cav1.4)                                                                                                                                                                                                                                                                |
| CAC1G_HUMAN | chembl | Q9Y5T3 | Voltage-dependent T-type calcium channel alpha-1G subunit (Voltage-gated calcium channel alpha subunit Cav3.1) (Cav3.1c) (NBR13)                                                                                                                                                                                                                                              |
| CAC1G_RAT   | chembl | O54898 | Voltage-dependent T-type calcium channel alpha-1G subunit (Voltage-gated calcium channel alpha subunit Cav3.1)                                                                                                                                                                                                                                                                |
| CAC1H_HUMAN | chembl | B5ME00 | Voltage-dependent T-type calcium channel alpha-1H subunit (Voltage-gated calcium channel alpha subunit Cav3.2) (Low-voltage-activated calcium channel alpha1 3.2 subunit)                                                                                                                                                                                                     |
| CAC1H_RAT   | chembl | Q9EQ60 | Voltage-dependent T-type calcium channel alpha-1H subunit (Voltage-gated calcium channel alpha subunit Cav3.2)                                                                                                                                                                                                                                                                |
| CAC1I_RAT   | chembl | Q9Z0Y8 | Voltage-dependent T-type calcium channel alpha-1I subunit (Voltage-gated calcium channel alpha subunit Cav3.3) (CaVT.3)                                                                                                                                                                                                                                                       |
| CAC1S_HUMAN | chembl | B1ALM2 | Voltage-dependent L-type calcium channel alpha-1S subunit (Voltage-gated calcium channel alpha subunit Cav1.1) (Calcium channel, L type, alpha-1 polypeptide, isoform 3, skeletal muscle)                                                                                                                                                                                     |
| CAC1S_RAT   | chembl | P70484 | Voltage-dependent L-type calcium channel alpha-1S subunit (Voltage-gated calcium channel alpha subunit Cav1.1) (Calcium channel, L type, alpha-1 polypeptide, isoform 3, skeletal muscle) (ROB1)                                                                                                                                                                              |
| CAH10_HUMAN | chembl | Q9NS85 | Carbonic anhydrase-related protein 10 (Carbonic anhydrase-related protein X) (CARP X) (CA-RP X) (Cerebral protein-15) (hucep-15) (UNQ533/PRO1076)                                                                                                                                                                                                                             |
| CAH11_HUMAN | chembl | Q6FHI1 | Carbonic anhydrase-related protein 2 precursor                                                                                                                                                                                                                                                                                                                                |



|             |        |        |                                                                                                                                                                                                                 |
|-------------|--------|--------|-----------------------------------------------------------------------------------------------------------------------------------------------------------------------------------------------------------------|
| CAH12_HUMAN | chembl | O43570 | (CARP-2) (CA-RP II) (CA-XI) (Carbonic anhydrase-related protein 11) (CARP XI) (CA-RP XI) (UNQ211/PRO237)<br>Carbonic anhydrase XII precursor (Carbonate dehydratase XII) (CA-XII) (Tumor antigen HOM-RCC-3.1.3) |
| CAH13_HUMAN | chembl | Q8N1Q1 | Carbonic anhydrase XIII (Carbonate dehydratase XIII) (CA-XIII)                                                                                                                                                  |
| CAH13_MOUSE | chembl | Q3UBM2 | Carbonic anhydrase XIII (Carbonate dehydratase XIII) (CA-XIII)                                                                                                                                                  |
| CAH14_HUMAN | chembl | Q8NCF4 | Carbonic anhydrase XIV precursor (Carbonate dehydratase XIV) (CA-XIV) (UNQ690/PRO1335)                                                                                                                          |
| CAH3_HUMAN  | chembl | B3KUC8 | Carbonic anhydrase III (Carbonate dehydratase III) (CA-III)                                                                                                                                                     |
| CAH4_HUMAN  | chembl | P22748 | Carbonic anhydrase IV precursor (Carbonate dehydratase IV) (CA-IV)                                                                                                                                              |
| CAH5B_MOUSE | chembl | Q8C3J9 | Carbonic anhydrase VB, mitochondrial precursor (Carbonate dehydratase VB) (CA-VB)                                                                                                                               |
| CAH6_BOVIN  | chembl | P18915 | Carbonic anhydrase VI precursor (Carbonate dehydratase VI) (CA-VI) (Secreted carbonic anhydrase) (Salivary carbonic anhydrase)                                                                                  |
| CAH6_HUMAN  | chembl | Q9UF03 | Carbonic anhydrase VI precursor (Carbonate dehydratase VI) (CA-VI) (Secreted carbonic anhydrase) (Salivary carbonic anhydrase)                                                                                  |
| CAH7_HUMAN  | chembl | P43166 | Carbonic anhydrase VII (Carbonate dehydratase VII) (CA-VII)                                                                                                                                                     |
| CAH8_HUMAN  | chembl | Q32MY2 | Carbonic anhydrase-related protein (CARP) (CA-VIII)                                                                                                                                                             |
| CAH_METTE   | chembl | P40881 | Carbonic anhydrase precursor                                                                                                                                                                                    |
| CALRL_HUMAN | chembl | A8K6G5 | Calcitonin gene-related peptide type 1 receptor precursor (CGRP type 1 receptor) (Calcitonin receptor-like receptor)                                                                                            |
| CAN1_MOUSE  | chembl | O35350 | Calpain-1 catalytic subunit (EC 3.4.22.52) (Calpain-1 large subunit) (Calcium-activated neutral proteinase 1) (CANP 1) (Calpain mu-type) (muCANP) (Micromolar-calpain).                                         |
| CAN1_RAT    | chembl | P97571 | Calpain-1 catalytic subunit (Calpain-1 large subunit) (Calcium-activated neutral proteinase 1) (CANP 1) (Calpain mu-type) (muCANP) (Micromolar-calpain)                                                         |
| CAN2_CHICK  | chembl | Q92178 | Calpain 2, large [catalytic] subunit precursor                                                                                                                                                                  |

|             |        |        |                                                                                                                                                                                                                                                                     |
|-------------|--------|--------|---------------------------------------------------------------------------------------------------------------------------------------------------------------------------------------------------------------------------------------------------------------------|
| CAN2_HUMAN  | chembl | A6NDG7 | (Calcium-activated neutral proteinase) (CANP) (M-type) (M-calpain) (Millimolar-calpain)<br>Calpain 2, large [catalytic] subunit precursor<br>(Calcium-activated neutral proteinase) (CANP) (M-type) (M-calpain) (Millimolar-calpain) (Calpain large polypeptide L2) |
| CANB1_HUMAN | chembl | B5MDU4 | Calcineurin B subunit isoform 1 (Protein phosphatase 2B regulatory subunit 1) (Protein phosphatase 3 regulatory subunit B alpha isoform 1)                                                                                                                          |
| CANB2_HUMAN | chembl | Q96LZ3 | Calcineurin B subunit isoform 2 (Protein phosphatase 2B regulatory subunit 2) (Protein phosphatase 3 regulatory subunit B beta isoform)                                                                                                                             |
| CANX_CHICK  | chembl | P00789 | (Calcineurin B-like protein) (CBLP) (CNBII)<br>Calpain, large [catalytic] subunit (Calcium-activated neutral proteinase) (CANP) (Mu/M-type)                                                                                                                         |
| CARP_RHICH  | chembl | P06026 | Rhizopuspepsin precursor                                                                                                                                                                                                                                            |
| CASP1_HUMAN | chembl | Q6PI75 | Caspase-1 precursor (CASP-1) (Interleukin-1 beta convertase) (IL-1BC) (IL-1 beta converting enzyme) (ICE) (Interleukin-1 beta converting enzyme) (p45)                                                                                                              |
| CASP1_MOUSE | chembl | P29452 | Caspase-1 precursor (CASP-1) (Interleukin-1 beta convertase) (IL-1BC) (IL-1 beta converting enzyme) (ICE) (Interleukin-1 beta converting enzyme) (p45)                                                                                                              |
| CASP6_HUMAN | chembl | Q9BQE7 | Caspase-6 precursor (CASP-6) (Apoptotic protease Mch-2)                                                                                                                                                                                                             |
| CASP7_HUMAN | chembl | B5BU45 | Caspase-7 precursor (CASP-7) (ICE-like apoptotic protease 3) (ICE-LAP3) (Apoptotic protease Mch-3) (CMH-1)                                                                                                                                                          |
| CASP8_HUMAN | chembl | O14676 | Caspase-8 precursor (CASP-8) (ICE-like apoptotic protease 5) (MORT1-associated CED-3 homolog) (MACH) (FADD-homologous ICE/CED-3-like protease) (FADD-like ICE) (FLICE) (Apoptotic cysteine protease) (Apoptotic protease Mch-5) (CAP4)                              |
| CASR_HUMAN  | chembl | Q13912 | Extracellular calcium-sensing receptor precursor (CaSR) (Parathyroid Cell calcium-sensing receptor)                                                                                                                                                                 |
| CATB_BOVIN  | chembl | Q3ZC03 | Cathepsin B precursor                                                                                                                                                                                                                                               |
| CATB_HUMAN  | chembl | P07858 | Cathepsin B precursor (Cathepsin B1) (APP secretase) (APPS)                                                                                                                                                                                                         |
| CATB_RAT    | chembl | P00787 | Cathepsin B precursor (Cathepsin B1) (RSG-2)                                                                                                                                                                                                                        |

|             |        |        |                                                                                                                                                                                                           |
|-------------|--------|--------|-----------------------------------------------------------------------------------------------------------------------------------------------------------------------------------------------------------|
| CATC_HUMAN  | chembl | P53634 | Dipeptidyl-peptidase I precursor (DPP-I) (DPPI) (Cathepsin C) (Cathepsin J) (Dipeptidyl transferase)                                                                                                      |
| CATD_HUMAN  | chembl | Q6IB57 | Cathepsin D precursor                                                                                                                                                                                     |
| CATF_HUMAN  | chembl | B2R964 | Cathepsin F precursor (CATSF)                                                                                                                                                                             |
| CATK_RABIT  | chembl | P43236 | Cathepsin K precursor (OC-2 protein)                                                                                                                                                                      |
| CATK_RAT    | chembl | O35186 | Cathepsin K precursor                                                                                                                                                                                     |
| CATL1_BOVIN | chembl | P25975 | Cathepsin L precursor                                                                                                                                                                                     |
| CATL1_RAT   | chembl | P07154 | Cathepsin L precursor (Major excreted protein) (MEP) (Cyclic protein-2) (CP-2)                                                                                                                            |
| CATS_HUMAN  | chembl | Q5T510 | Cathepsin S precursor                                                                                                                                                                                     |
| CATS_MOUSE  | chembl | O70370 | Cathepsin S precursor (EC 3.4.22.27).                                                                                                                                                                     |
| CBPA1_HUMAN | chembl | A4D1M1 | Carboxypeptidase A1 precursor                                                                                                                                                                             |
| CBPB1_HUMAN | chembl | Q96BQ8 | Carboxypeptidase B precursor (Pancreas-specific protein) (PASP)                                                                                                                                           |
| CBPB1_PIG   | chembl | P09955 | procarboxypeptidase B [ <i>Sus scrofa</i> ]                                                                                                                                                               |
| CBPB2_HUMAN | chembl | Q96IY4 | plasma carboxypeptidase B2 isoform a preproprotein [ <i>Homo sapiens</i> ]                                                                                                                                |
| CBPN_HUMAN  | chembl | P15169 | Carboxypeptidase N catalytic chain precursor (Lysine carboxypeptidase) (Arginine carboxypeptidase) (Kininase 1) (Serum carboxypeptidase N) (SCPN) (Anaphylatoxin inactivator) (Plasma carboxypeptidase B) |
| CCKAR_HUMAN | chembl | B2R9Z5 | Cholecystokinin type A receptor (CCK-A receptor) (CCK-AR)                                                                                                                                                 |
| CCKAR_MOUSE | chembl | O08786 | Cholecystokinin type A receptor (CCK-A receptor) (CCK-AR)                                                                                                                                                 |
| CCKAR_RAT   | chembl | P30551 | Cholecystokinin type A receptor (CCK-A receptor) (CCK-AR)                                                                                                                                                 |
| CCNA1_HUMAN | chembl | Q8IY91 | Cyclin A1                                                                                                                                                                                                 |
| CCNA2_HUMAN | chembl | P20248 | Cyclin A2 (Cyclin A)                                                                                                                                                                                      |
| CCNB1_HUMAN | chembl | P14635 | G2/mitotic-specific cyclin B1                                                                                                                                                                             |
| CCNB2_HUMAN | chembl | O95067 | G2/mitotic-specific cyclin B2                                                                                                                                                                             |
| CCNB3_HUMAN | chembl | Q8WWL7 | G2/mitotic-specific cyclin B3                                                                                                                                                                             |
| CCNB_MARGL  | chembl | P15206 | G2/mitotic-specific cyclin B                                                                                                                                                                              |
| CCND1_HUMAN | chembl | P24385 | G1/S-specific cyclin D1 (PRAD1 oncogene) (BCL-1 oncogene)                                                                                                                                                 |
| CCND2_HUMAN | chembl | Q5U035 | G1/S-specific cyclin D2                                                                                                                                                                                   |
| CCND3_HUMAN | chembl | Q6FG62 | G1/S-specific cyclin D3                                                                                                                                                                                   |
| CCNE1_HUMAN | chembl | Q9UD21 | G1/S-specific cyclin E1                                                                                                                                                                                   |

|             |        |        |                                                                                                                                                                                                         |
|-------------|--------|--------|---------------------------------------------------------------------------------------------------------------------------------------------------------------------------------------------------------|
| CCNE2_HUMAN | chembl | O95439 | G1/S-Specific cyclin E2                                                                                                                                                                                 |
| CCNH_HUMAN  | chembl | Q53X72 | Cyclin H (MO15-associated protein) (p37) (p34)                                                                                                                                                          |
| CCNT1_HUMAN | chembl | O60563 | Cyclin T1 (Cyclin T) (CycT1)                                                                                                                                                                            |
| CCR1_MOUSE  | chembl | Q91VP9 | C-C chemokine receptor type 1 (C-C CKR-1) (CC-CKR-1) (CCR-1) (CCR1) (Macrophage inflammatory protein-1 alpha receptor) (MIP-1alpha-R) (RANTES-R)                                                        |
| CCR2_HUMAN  | chembl | B2RMT0 | C-C chemokine receptor type 2 (C-C CKR-2) (CC-CKR-2) (CCR-2) (CCR2) (Monocyte chemoattractant protein 1 receptor) (MCP-1-R)                                                                             |
| CCR2_MOUSE  | chembl | P51683 | C-C chemokine receptor type 2 (C-C CKR-2) (CC-CKR-2) (CCR-2) (CCR2) (JE/FIC receptor) (MCP-1 receptor) (CD192 antigen).                                                                                 |
| CCR3_MOUSE  | chembl | P51678 | Probable C-C chemokine receptor type 3 (C-C CKR-3) (CC-CKR-3) (CCR-3) (CCR3) (CKR3) (Macrophage inflammatory protein-1 alpha receptor-like 2) (MIP-1 alpha RL2)                                         |
| CCR3_RAT    | chembl | O54814 | C-C chemokine receptor type 3 (C-C CKR-3) (CC-CKR-3) (CCR-3) (CCR3) (CKR3)                                                                                                                              |
| CCR5_MOUSE  | chembl | O35891 | C-C chemokine receptor type 5 (C-C CKR-5) (CC-CKR-5) (CCR-5) (MIP-1 alpha receptor)                                                                                                                     |
| CD45_HUMAN  | chembl | Q16614 | Leukocyte common antigen precursor (L-CA) (CD45 antigen) (T200)                                                                                                                                         |
| CD5R1_HUMAN | chembl | Q5U0G3 | Cyclin-dependent kinase 5 activator 1 precursor (CDK5 activator 1) (Cyclin-dependent kinase 5 regulatory subunit 1) (Tau protein kinase II 23 kDa subunit) (TPKII regulatory subunit) (p23) (p25) (p35) |
| CDC2_MOUSE  | chembl | P70337 | Cell division control protein 2 homolog (p34 protein kinase) (Cyclin-dependent kinase 1) (CDK1)                                                                                                         |
| CDC7_HUMAN  | chembl | O00558 | Cell division cycle 7-related protein kinase (CDC7-related kinase) (HsCdc7) (huCdc7)                                                                                                                    |
| CDD_MOUSE   | chembl | Q9D7V3 | Cytidine deaminase (Cytidine aminohydrolase)                                                                                                                                                            |
| CDK5_HUMAN  | chembl | Q00535 | Cell division protein kinase 5 (Tau protein kinase II catalytic subunit) (TPKII catalytic subunit) (Serine/threonine-protein kinase PSSALRE)                                                            |
| CDK7_HUMAN  | chembl | Q9BS60 | Cell division protein kinase 7 (CDK-activating kinase) (CAK) (TFIIH basal transcription factor complex kinase subunit) (39 kDa protein kinase) (P39 Mo15) (STK1) (CAK1)                                 |

|             |        |        |                                                                                                                                                                                               |
|-------------|--------|--------|-----------------------------------------------------------------------------------------------------------------------------------------------------------------------------------------------|
| CDK9_HUMAN  | chembl | Q96TF1 | Cell division protein kinase 9 (Cyclin-dependent kinase 9) (Serine/threonine-protein kinase PITALRE) (C-2K) (Cell division cycle 2-like protein kinase 4)                                     |
| CEL2A_HUMAN | chembl | P08217 | Elastase 2A precursor                                                                                                                                                                         |
| CEL2B_HUMAN | chembl | P08218 | Elastase 2B precursor                                                                                                                                                                         |
| CEL3A_HUMAN | chembl | B1AQ53 | Elastase IIIA precursor (Protease E)                                                                                                                                                          |
| CEL3B_HUMAN | chembl | Q5VU28 | Elastase IIIB precursor (Protease E)                                                                                                                                                          |
| CELA1_HUMAN | chembl | Q9UNI1 | Elastase 1 precursor                                                                                                                                                                          |
| CELA1_PIG   | chembl | Q29625 | Elastase 1 precursor                                                                                                                                                                          |
| CEL_BOVIN   | chembl | P30122 | Bile-salt-activated lipase precursor (EC 3.1.1.13) (BAL) (Bile-salt-stimulated lipase) (BSSL) (Carboxyl ester lipase) (Sterol esterase) (Cholesterol esterase) (Pancreatic lysophospholipase) |
| CEL_HUMAN   | chembl | Q16398 | Bile-salt-activated lipase precursor (EC 3.1.1.13) (BAL) (Bile-salt-stimulated lipase) (BSSL) (Carboxyl ester lipase) (Sterol esterase) (Cholesterol esterase) (Pancreatic lysophospholipase) |
| CHKA_HUMAN  | chembl | Q8NE29 | Choline kinase alpha (CK) (CHETK-alpha)                                                                                                                                                       |
| CHLE_MOUSE  | chembl | Q03311 | Cholinesterase precursor (Acylcholine acylhydrolase) (Choline esterase II) (Butyrylcholine esterase) (Pseudocholinesterase)                                                                   |
| CHS1_CANAL  | chembl | P23316 | Chitin synthase 1 (Chitin-UDP acetyl-glucosaminyl transferase 1)                                                                                                                              |
| CLAT_HUMAN  | chembl | Q9BQ23 | Choline O-acetyltransferase (CHOACTase) (Choline acetylase) (ChAT)                                                                                                                            |
| CLK1_HUMAN  | chembl | Q8N5V8 | Dual specificity protein kinase CLK1 (EC 2.7.12.1) (CDC-like kinase 1).                                                                                                                       |
| CLK2_HUMAN  | chembl | Q96CQ0 | Dual specificity protein kinase CLK2 (EC 2.7.12.1) (CDC-like kinase 2).                                                                                                                       |
| CLK4_HUMAN  | chembl | Q9HAZ1 | Dual specificity protein kinase CLK4 (EC 2.7.12.1) (CDC-like kinase 4).                                                                                                                       |
| CLTR1_HUMAN | chembl | Q9Y271 | Cysteinyl leukotriene receptor 1 (CysLTR1) (Cysteinyl leukotriene D4 receptor) (LTD4 receptor) (HG55) (HMTMF81)                                                                               |
| CLTR2_HUMAN | chembl | Q9NS75 | Cysteinyl leukotriene receptor 2 (CysLTR2) (PSEC0146) (HG57) (HPN321) (hGPCR21)                                                                                                               |
| CNCG_BOVIN  | chembl | P22571 | Retinal cone rhodopsin-sensitive cGMP 3,5-cyclic phosphodiesterase gamma-subunit (GMP-PDE gamma)                                                                                              |

|             |        |        |                                                                                                                                                   |
|-------------|--------|--------|---------------------------------------------------------------------------------------------------------------------------------------------------|
| CNCG_HUMAN  | chembl | Q52LY7 | Retinal cone rhodopsin-sensitive cGMP 3,5-cyclic phosphodiesterase gamma-subunit (GMP-PDE gamma)                                                  |
| CNR1_HUMAN  | chembl | P21554 | Cannabinoid receptor 1 (CB1) (CB-R) (CANN6)                                                                                                       |
| CNR1_MOUSE  | chembl | Q5SF33 | Cannabinoid receptor 1 (CB1) (CB-R) (Brain-type cannabinoid receptor)                                                                             |
| CNR2_HUMAN  | chembl | Q6NSY0 | Cannabinoid receptor 2 (CB2) (CB-2) (CX5)                                                                                                         |
| CNR2_RAT    | chembl | Q9EP74 | Cannabinoid receptor 2 (CB2) (CB-2)                                                                                                               |
| CNRG_BOVIN  | chembl | P04972 | Retinal rod rhodopsin-sensitive cGMP 3,5-cyclic phosphodiesterase gamma-subunit (GMP-PDE gamma)                                                   |
| CNRG_HUMAN  | chembl | Q3KP63 | Retinal rod rhodopsin-sensitive cGMP 3,5-cyclic phosphodiesterase gamma-subunit (GMP-PDE gamma)                                                   |
| COLA_CLOPE  | chembl | P43153 | Microbial collagenase precursor (120 kDa collagenase)                                                                                             |
| COMT_RAT    | chembl | P22734 | Catechol O-methyltransferase                                                                                                                      |
| CP17A_RAT   | chembl | Q68FY2 | Cytochrome P450 17A1 (CYPXVII) (P450-C17) (P450c17) (Steroid 17-alpha-hydroxylase/17,20 lyase)                                                    |
| CP19A_RAT   | chembl | P22443 | Cytochrome P450 19A1 (Aromatase) (CYPXIX) (Estrogen synthetase) (P-450AROM)                                                                       |
| CP24A_RAT   | chembl | Q09128 | Cytochrome P450 24A1, mitochondrial precursor (P450-CC24) (Vitamin D(3) 24-hydroxylase) (1,25-dihydroxyvitamin D(3) 24-hydroxylase) (24-OHase)    |
| CP26A_HUMAN | chembl | Q5VXI0 | Cytochrome P450 26 (Retinoic acid-metabolizing cytochrome) (P450 retinoic acid-inactivating 1) (P450RAI) (hP450RAI) (Retinoic acid 4-hydroxylase) |
| CP2A5_MOUSE | chembl | P20852 | Cytochrome P450 2A5 (CYPIIA5) (Coumarin 7-hydroxylase) (P450-15-COH) (P450-IIA3.2)                                                                |
| CP2C8_HUMAN | chembl | Q9UCZ9 | Cytochrome P450 2C8 (CYP IIC8) (P450 form 1) (P450 MP-12/MP-20) (P450 IIC2) (S-mephenytoin 4-hydroxylase)                                         |
| CP2J2_HUMAN | chembl | P51589 | Cytochrome P450 2J2 (EC 1.14.14.1) (CYP IIJ2) (Arachidonic acid epoxygenase).                                                                     |
| CP3A1_RAT   | chembl | P04800 | Cytochrome P450 3A1 (EC 1.14.14.1) (CYP IIIA1) (P450-PCN1).                                                                                       |
| CP3A2_RAT   | chembl | Q64629 | Cytochrome P450 3A2 (EC 1.14.14.1) (CYP IIIA2) (P450-PCN2) (P450/6- beta-A) (Testosterone 6-                                                      |

|             |        |        |                                                                                                                                                                                                                                      |
|-------------|--------|--------|--------------------------------------------------------------------------------------------------------------------------------------------------------------------------------------------------------------------------------------|
| CP4AA_RAT   | chembl | P08516 | beta-hydroxylase).                                                                                                                                                                                                                   |
| CP4AB_HUMAN | chembl | Q16865 | Cytochrome P450 4A1 (CYPIVA1) (Lauric acid omega-hydroxylase) (P450-LA-omega 1) (P452)                                                                                                                                               |
| CP4AE_RAT   | chembl | P20817 | Cytochrome P450 4A11 precursor (CYPIVA11) (Fatty acid omega-hydroxylase) (P-450 HK omega) (Lauric acid omega-hydroxylase) (CYP4A11) (P450-HL-omega)                                                                                  |
| CP51A_HUMAN | chembl | O00772 | Cytochrome P450 4A3 precursor (CYPIVA3) (Lauric acid omega-hydroxylase) (P450-LA-omega 3)                                                                                                                                            |
| CP51A_RAT   | chembl | Q64549 | Cytochrome P450 51A1 (CYPLI) (P450LI) (Sterol 14-alpha demethylase) (Lanosterol 14-alpha demethylase) (LDM) (P450-14DM) (P45014DM)                                                                                                   |
| CPNS1_HUMAN | chembl | P04632 | Cytochrome P450 51A1 (CYPLI) (P450LI) (Sterol 14-alpha demethylase) (Lanosterol 14-alpha demethylase) (LDM) (P450-14DM)                                                                                                              |
| CPNS1_MOUSE | chembl | Q9R1C5 | Calpain small subunit 1 (CSS1) (Calcium-dependent protease small subunit 1) (Calcium-dependent protease small subunit) (CDPS) (Calpain regulatory subunit) (Calcium-activated neutral proteinase small subunit) (CANP small subunit) |
| CPNS1_PIG   | chembl | P04574 | Calpain small subunit 1 (CSS1) (Calcium-dependent protease small subunit 1) (Calcium-dependent protease small subunit) (CDPS) (Calpain regulatory subunit) (Calcium-activated neutral proteinase small subunit) (CANP small subunit) |
| CPNS1_RAT   | chembl | Q64537 | Calpain small subunit 1 (CSS1) (Calcium-dependent protease small subunit 1) (Calcium-dependent protease small subunit) (CDPS) (Calpain regulatory subunit) (Calcium-activated neutral proteinase small subunit) (CANP small subunit) |

|             |        |        |                                                                                                                                                                                                                                  |
|-------------|--------|--------|----------------------------------------------------------------------------------------------------------------------------------------------------------------------------------------------------------------------------------|
| CPT1B_RAT   | chembl | Q63704 | Carnitine O-palmitoyltransferase I, mitochondrial muscle isoform (CPT I) (CPTI-M) (Carnitine palmitoyltransferase 1B) (Carnitine palmitoyltransferase I like protein)                                                            |
| CRFR1_HUMAN | chembl | Q9UK64 | Corticotropin releasing factor receptor 1 precursor (CRF-R) (CRF1) (Corticotropin-releasing hormone receptor 1) (CRH-R 1)                                                                                                        |
| CRFR2_MOUSE | chembl | Q60808 | Corticotropin releasing factor receptor 2 precursor (CRF-R 2) (CRF2) (Corticotropin-releasing hormone receptor 2) (CRH-R 2) (CRF-RB) (CRH-R2)                                                                                    |
| CRFR2_RAT   | chembl | P47866 | Corticotropin releasing factor receptor 2 precursor (CRF-R 2) (CRF2) (Corticotropin-releasing hormone receptor 2) (CRH-R 2)                                                                                                      |
| CSK21_HUMAN | chembl | P19138 | Casein kinase II, alpha chain (CK II)                                                                                                                                                                                            |
| CSK21_MOUSE | chembl | Q60737 | Casein kinase II, alpha chain (CK II)                                                                                                                                                                                            |
| CSK22_HUMAN | chembl | P19784 | Casein kinase II, alpha chain (CK II)                                                                                                                                                                                            |
| CSK2A_MAIZE | chembl | P28523 | Casein kinase II subunit alpha (EC 2.7.11.1) (CK II) (CK2-alpha).                                                                                                                                                                |
| CSK2B_HUMAN | chembl | Q4VX47 | Casein kinase II beta subunit (CK II beta) (Phosvitin) (G5a)                                                                                                                                                                     |
| CSK_HUMAN   | chembl | Q6FGZ6 | Tyrosine-protein kinase CSK (C-SRC kinase) (Protein-tyrosine kinase CYL)                                                                                                                                                         |
| CSK_MOUSE   | chembl | Q03143 | Tyrosine-protein kinase CSK (C-SRC kinase) (Protein-tyrosine kinase MPK-2) (p50CSK)                                                                                                                                              |
| CTR4_HUMAN  | chembl | Q3KNQ6 | Cationic amino acid transporter-4 (CAT-4) (CAT4)                                                                                                                                                                                 |
| CTRA_BOVIN  | chembl | P00766 | Chymotrypsinogen A                                                                                                                                                                                                               |
| CTRB_BOVIN  | chembl | P00767 | Chymotrypsinogen B                                                                                                                                                                                                               |
| CTRC_HUMAN  | chembl | O00765 | Caldecrin precursor (Chymotrypsin C)                                                                                                                                                                                             |
| CXCR3_HUMAN | chembl | Q7Z710 | C-X-C chemokine receptor type 3 (CXC-R3) (CXCR-3) (CKR-L2) (CD183 antigen)                                                                                                                                                       |
| CXCR3_MOUSE | chembl | Q9QWN6 | C-X-C chemokine receptor type 3 (CXC-R3) (CXCR-3) (Interferon- inducible protein 10 receptor) (IP-10 receptor) (CD183 antigen).                                                                                                  |
| CXCR4_HUMAN | chembl | P61073 | C-X-C chemokine receptor type 4 (CXC-R4) (CXCR-4) (Stromal cell-derived factor 1 receptor) (SDF-1 receptor) (Fusin) (Leukocyte-derived seven transmembrane domain receptor) (LESTR) (LCR1) (FB22) (NPYRL) (HM89) (CD184 antigen) |
| DAPK3_HUMAN | chembl | B3KQE2 | Death-associated protein kinase 3 (DAP kinase 3)                                                                                                                                                                                 |



|             |        |        |                                                                                                                                                                                                                                               |
|-------------|--------|--------|-----------------------------------------------------------------------------------------------------------------------------------------------------------------------------------------------------------------------------------------------|
| DCAM_RAT    | chembl | P17708 | (DAP-like kinase) (Dlk) (ZIP-kinase)<br>S-adenosylmethionine decarboxylase proenzyme (AdoMetDC) (SamDC) [Contains: (S-adenosylmethionine decarboxylase alpha chain) ] [Contains: (S-adenosylmethionine decarboxylase beta chain) ]            |
| DEFM_HUMAN  | chembl | Q9HBH1 | Peptide deformylase, mitochondrial precursor (PDF) (Polypeptide deformylase)                                                                                                                                                                  |
| DEF_STAAM   | chembl | P68825 | Peptide deformylase (PDF) (Polypeptide deformylase)                                                                                                                                                                                           |
| DHI1_HUMAN  | chembl | B2R9Z1 | Corticosteroid 11-beta-dehydrogenase, isozyme 1 (11-DH) (11-beta-hydroxysteroid dehydrogenase 1) (11-beta-HSD1)                                                                                                                               |
| DHI1_RAT    | chembl | P16232 | Corticosteroid 11-beta-dehydrogenase, isozyme 1 (11-DH) (11-beta-hydroxysteroid dehydrogenase 1) (11-beta-HSD1)                                                                                                                               |
| DHI2_MOUSE  | chembl | Q91WK3 | Corticosteroid 11-beta-dehydrogenase isozyme 2 (EC 1.1.1.-) (11-DH2) (11-beta-hydroxysteroid dehydrogenase type 2) (11-beta-HSD2) (NAD-dependent 11-beta-hydroxysteroid dehydrogenase).<br>Sorbitol dehydrogenase (L-idoitol 2-dehydrogenase) |
| DHSO_RAT    | chembl | A2VCV9 | Deoxyhypusine synthase (DHS)                                                                                                                                                                                                                  |
| DHYS_RAT    | chembl | Q6AY53 | Deoxynucleoside kinase (Deoxyribonucleoside kinase) (Dm-dNK) (Multispecific deoxynucleoside kinase)                                                                                                                                           |
| DNK_DROME   | chembl | Q9XZT6 | Deoxynucleoside kinase (Deoxyribonucleoside kinase) (Dm-dNK) (Multispecific deoxynucleoside kinase)                                                                                                                                           |
| DOPO_BOVIN  | chembl | P15101 | Dopamine beta-monoxygenase precursor (Dopamine beta-hydroxylase) (DBH)                                                                                                                                                                        |
| DPEP1_HUMAN | chembl | Q96AK2 | Microsomal dipeptidase precursor (MDP) (Dehydropeptidase-I) (Renal dipeptidase) (RDP)                                                                                                                                                         |
| DPO1_THEAQ  | chembl | P19821 | DNA polymerase I, thermostable (Taq polymerase 1)                                                                                                                                                                                             |
| DPO3_STAAU  | chembl | P68851 | DNA polymerase III polC-type (EC 2.7.7.7) (PolIII).                                                                                                                                                                                           |
| DPOLB_HUMAN | chembl | Q6FI34 | DNA polymerase beta (EC 4.2.99.-)                                                                                                                                                                                                             |
| DPOL_HHV11  | chembl | B9VQF8 | DNA polymerase                                                                                                                                                                                                                                |
| DPOL_HHV6U  | chembl | P28857 | DNA polymerase [Human herpesvirus 6]                                                                                                                                                                                                          |
| DPOL_VZVD   | chembl | P09252 | DNA polymerase                                                                                                                                                                                                                                |
| DPP2_RAT    | chembl | Q9EPB1 | Dipeptidyl-peptidase II precursor (DPP II) (Dipeptidyl aminopeptidase II) (Quiescent cell proline dipeptidase)                                                                                                                                |
| DPP3_RAT    | chembl | Q32Q87 | Dipeptidyl-peptidase III (DPP III) (Dipeptidyl                                                                                                                                                                                                |

|            |        |        |                                                                                                                                                                                                                                                                                                                                   |
|------------|--------|--------|-----------------------------------------------------------------------------------------------------------------------------------------------------------------------------------------------------------------------------------------------------------------------------------------------------------------------------------|
| DPP4_MOUSE | chembl | P28843 | aminopeptidase III) (Dipeptidyl arylamidase III)<br>Dipeptidyl peptidase 4 (Dipeptidyl peptidase IV)<br>(DPP IV) (T-cell activation antigen CD26)<br>(Thymocyte-activating molecule) (THAM) [Contains:<br>(Dipeptidyl peptidase 4 membrane form) (Dipeptidyl<br>peptidase IV membrane form) ] [Contains:<br>(Dipeptidyl peptid... |
| DPP4_PIG   | chembl | Q866G2 | Dipeptidyl peptidase IV (DPP IV) (T-cell activation<br>antigen CD26)                                                                                                                                                                                                                                                              |
| DPP4_RAT   | chembl | P14740 | Dipeptidyl peptidase IV (DPP IV) (T-cell activation<br>antigen CD26) (GP110 glycoprotein) (Bile<br>canaliculus domain-specific membrane<br>glycoprotein)                                                                                                                                                                          |
| DPP6_RAT   | chembl | P46101 | Dipeptidyl aminopeptidase-like protein 6<br>(Dipeptidylpeptidase VI) (Dipeptidylpeptidase 6)<br>(Dipeptidyl peptidase IV like protein) (Dipeptidyl<br>aminopeptidase-related protein) (DPPX)                                                                                                                                      |
| DPP8_HUMAN | chembl | Q8NEM5 | Dipeptidyl peptidase 8 (Dipeptidyl peptidase VIII)<br>(DP8) (Prolyl dipeptidase DPP8) (Dipeptidyl<br>peptidase IV-related protein 1) (DPRP-1)                                                                                                                                                                                     |
| DPP9_HUMAN | chembl | O75273 | Dipeptidyl peptidase 9 (Dipeptidyl peptidase IX)<br>(DP9) (Dipeptidyl peptidase-like protein 9) (DPLP9)<br>(Dipeptidyl peptidase IV-related protein 2) (DPRP-<br>2)                                                                                                                                                               |
| DPYD_HUMAN | chembl | B1AN21 | Dihydropyrimidine dehydrogenase [NADP+]<br>precursor (DPD) (DHPDHase) (Dihydrouracil<br>dehydrogenase) (Dihydrothymine dehydrogenase)                                                                                                                                                                                             |
| DRD1_HUMAN | chembl | P21728 | D(1A) dopamine receptor                                                                                                                                                                                                                                                                                                           |
| DRD1_MOUSE | chembl | Q8C8P8 | D(1A) dopamine receptor                                                                                                                                                                                                                                                                                                           |
| DRD1_PIG   | chembl | P50130 | D(1A) dopamine receptor                                                                                                                                                                                                                                                                                                           |
| DRD2_BOVIN | chembl | P20288 | D(2) dopamine receptor                                                                                                                                                                                                                                                                                                            |
| DRD2_CERAE | chembl | P52702 | D(2) dopamine receptor                                                                                                                                                                                                                                                                                                            |
| DRD2_MOUSE | chembl | P61168 | D(2) dopamine receptor                                                                                                                                                                                                                                                                                                            |
| DRD3_RAT   | chembl | P70647 | D(3) dopamine receptor                                                                                                                                                                                                                                                                                                            |
| DRD4_MOUSE | chembl | P51436 | D(4) dopamine receptor (D(2C) dopamine receptor)                                                                                                                                                                                                                                                                                  |
| DRD4_RAT   | chembl | P30729 | D(4) dopamine receptor (D(2C) dopamine receptor)                                                                                                                                                                                                                                                                                  |
| DRTS_TOXGO | chembl | Q07422 | Bifunctional dihydrofolate reductase-thymidylate<br>synthase (DHFR-TS) (Dihydrofolate reductase)<br>(Thymidylate synthase)                                                                                                                                                                                                        |

|             |        |        |                                                                                                                                                                            |
|-------------|--------|--------|----------------------------------------------------------------------------------------------------------------------------------------------------------------------------|
| DUOX2_HUMAN | chembl | Q9NRD8 | dual oxidase 2 precursor [Homo sapiens]                                                                                                                                    |
| DUS22_HUMAN | chembl | Q5VWR2 | dual specificity phosphatase 22 [Homo sapiens]                                                                                                                             |
| DUT_HUMAN   | chembl | A8K650 | Deoxyuridine 5-triphosphate nucleotidohydrolase, mitochondrial precursor (dUTPase) (dUTP pyrophosphatase)                                                                  |
| DYN1_HUMAN  | chembl | Q05193 | Dynammin-1                                                                                                                                                                 |
| DYR1A_HUMAN | chembl | O60769 | Dual-specificity tyrosine-phosphorylation regulated kinase 1A (Protein kinase minibrain homolog) (MNBH) (HP86) (Dual specificity YAK1-related kinase)                      |
| DYR1A_MOUSE | chembl | Q61214 | Dual specificity tyrosine-phosphorylation-regulated kinase 1A (EC 2.7.12.1) (Protein kinase minibrain homolog) (MNBH) (MP86) (Dual specificity YAK1-related kinase).       |
| DYR1_ECOLX  | chembl | P13923 | Dihydrofolate reductase type I (Trimethoprim resistance protein)                                                                                                           |
| DYR_CANAL   | chembl | O59840 | Dihydrofolate reductase                                                                                                                                                    |
| DYR_ECOLI   | chembl | P0ABQ4 | Dihydrofolate reductase                                                                                                                                                    |
| DYR_HUMAN   | chembl | Q61RW8 | Dihydrofolate reductase                                                                                                                                                    |
| DYR_LACCA   | chembl | P00381 | Dihydrofolate reductase                                                                                                                                                    |
| DYR_PNECA   | chembl | P16184 | Dihydrofolate reductase                                                                                                                                                    |
| DYR_RAT     | chembl | Q920D2 | dihydrofolate reductase [Rattus norvegicus]                                                                                                                                |
| DYR_STAAW   | chembl | Q8NWQ9 | dihydrofolate reductase [Staphylococcus aureus subsp. aureus MW2]                                                                                                          |
| DYR_YEAST   | chembl | P07807 | Dihydrofolate reductase                                                                                                                                                    |
| E2F1_HUMAN  | chembl | Q92768 | Transcription factor E2F1 (E2F-1) (Retinoblastoma binding protein 3) (RBBP-3) (PRB-binding protein E2F-1) (PBR3) (Retinoblastoma-associated protein 1) (RBAP-1)            |
| EAA1_HUMAN  | chembl | B2R5T3 | Excitatory amino acid transporter 1 (Sodium-dependent glutamate/aspartate transporter 1) (Glial glutamate transporter) (GLAST-1)                                           |
| EAA2_HUMAN  | chembl | P43004 | Excitatory amino acid transporter 2 (Sodium-dependent glutamate/aspartate transporter 2)                                                                                   |
| EAA3_HUMAN  | chembl | Q8N199 | Excitatory amino acid transporter 3 (Sodium-dependent glutamate/aspartate transporter 3) (Excitatory amino-acid carrier 1) (Neuronal and epithelial glutamate transporter) |
| EBP_HUMAN   | chembl | Q61BI9 | 3-beta-hydroxysteroid-delta(8),delta(7)-isomerase                                                                                                                          |

|             |        |        |                                                                                                                                                                                                                                                                                                              |
|-------------|--------|--------|--------------------------------------------------------------------------------------------------------------------------------------------------------------------------------------------------------------------------------------------------------------------------------------------------------------|
| ECE1_BOVIN  | chembl | A2VDM9 | (Cholestenol delta-isomerase) (Delta8-delta7 sterol isomerase) (D8-D7 sterol isomerase) (Emopamil-binding protein)                                                                                                                                                                                           |
| EDNRA_HUMAN | chembl | P25101 | Endothelin-converting enzyme 1 (ECE-1)                                                                                                                                                                                                                                                                       |
| EDNRA_MOUSE | chembl | Q91VV2 | Endothelin-1 receptor precursor (Endothelin A receptor) (ET-A) (hET-AR) (ETA-R)                                                                                                                                                                                                                              |
| EDNRA_RAT   | chembl | P26684 | Endothelin-1 receptor precursor (Endothelin A receptor) (ET-A) (ET-AR)                                                                                                                                                                                                                                       |
| EDNRB_HUMAN | chembl | A8K3T4 | Endothelin-1 receptor precursor (Endothelin A receptor) (ET-A)                                                                                                                                                                                                                                               |
| EDNRB_PIG   | chembl | P35463 | Endothelin B receptor precursor (ET-B) (Endothelin receptor Non-selective type)                                                                                                                                                                                                                              |
| EGFR_HUMAN  | chembl | Q9UMD7 | Endothelin B receptor precursor (ET-B) (Endothelin receptor Non-selective type)                                                                                                                                                                                                                              |
| EGFR_MOUSE  | chembl | Q01279 | Epidermal growth factor receptor precursor (Receptor tyrosine-protein kinase ErbB-1)                                                                                                                                                                                                                         |
| ENPP2_HUMAN | chembl | Q13827 | Epidermal growth factor receptor precursor<br>Ectonucleotide pyrophosphatase/phosphodiesterase 2 (E-NPP 2) (Phosphodiesterase I/nucleotide pyrophosphatase 2) (Phosphodiesterase I alpha) (PD-Ialpha) (Autotaxin) [Includes Alkaline phosphodiesterase I (EC 3.1.4.1), Nucleotide pyrophosphatase (EC 3.6... |
| EPHA2_HUMAN | chembl | Q8N3Z2 | Ephrin type-A receptor 2 precursor (EC 2.7.10.1) (Tyrosine-protein kinase receptor ECK) (Epithelial cell kinase).                                                                                                                                                                                            |
| EPHA3_HUMAN | chembl | P29320 | Ephrin type-A receptor 3 precursor (EC 2.7.10.1) (Tyrosine-protein kinase receptor ETK1) (HEK) (HEK4).                                                                                                                                                                                                       |
| EPHA4_HUMAN | chembl | Q2M380 | Ephrin type-A receptor 4 precursor (EC 2.7.10.1) (Tyrosine-protein kinase receptor SEK) (Receptor protein-tyrosine kinase HEK8).                                                                                                                                                                             |
| EPHA5_HUMAN | chembl | P54756 | Ephrin type-A receptor 5 precursor (EC 2.7.10.1) (Tyrosine-protein kinase receptor EHK-1) (EPH homology kinase 1) (Receptor protein- tyrosine kinase HEK7).                                                                                                                                                  |
| EPHA6_HUMAN | chembl | Q9UF33 | Ephrin type-A receptor 6 precursor (EC 2.7.10.1) (Tyrosine-protein kinase receptor EHK-2) (EPH homology kinase 2).                                                                                                                                                                                           |

|             |        |        |                                                                                                                                                              |
|-------------|--------|--------|--------------------------------------------------------------------------------------------------------------------------------------------------------------|
| EPHA7_HUMAN | chembl | Q5VTU0 | Ephrin type-A receptor 7 precursor (EC 2.7.10.1) (Tyrosine-protein kinase receptor EHK-3) (EPH homology kinase 3) (Receptor protein- tyrosine kinase HEK11). |
| EPHA8_HUMAN | chembl | Q9P269 | Ephrin type-A receptor 8 precursor (EC 2.7.10.1) (Tyrosine-protein kinase receptor EEK) (EPH- and ELK-related kinase) (HEK3).                                |
| EPHB1_HUMAN | chembl | O95143 | Ephrin type-B receptor 1 precursor (EC 2.7.10.1) (Tyrosine-protein kinase receptor EPH-2) (NET) (HEK6) (ELK).                                                |
| EPHB2_HUMAN | chembl | O43477 | Ephrin type-B receptor 2 precursor (Tyrosine-protein kinase receptor EPH-3) (DRT) (Receptor protein-tyrosine kinase HEK5) (ERK)                              |
| EPHB4_HUMAN | chembl | P54760 | Ephrin type-B receptor 4 precursor (Tyrosine-protein kinase receptor HTK)                                                                                    |
| EPYC_HUMAN  | chembl | Q99645 | Dermatan sulfate proteoglycan 3 precursor (Epiphygan) (Small chondroitin/dermatan sulfate proteoglycan) (Proteoglycan-Lb) (PG-Lb)                            |
| ERBB2_RAT   | chembl | P06494 | Receptor tyrosine-protein kinase erbB-2 precursor (p185erbB2) (C-erbB-2) (NEU proto-oncogene) (Epidermal growth factor receptor-related protein)             |
| ERCC5_HUMAN | chembl | Q5JUS5 | DNA-repair protein complementing XP-G cells (Xeroderma pigmentosum group G complementing protein) (DNA excision repair protein ERCC-5)                       |
| ERG19_HUMAN | chembl | Q53Y65 | Diphosphomevalonate decarboxylase (Mevalonate pyrophosphate decarboxylase) (Mevalonate (diphospho)decarboxylase)                                             |
| ERG1_HUMAN  | chembl | Q14534 | Squalene monooxygenase (Squalene epoxidase) (SE)                                                                                                             |
| ERG1_RAT    | chembl | P52020 | Squalene monooxygenase (Squalene epoxidase) (SE)                                                                                                             |
| ERG7_HUMAN  | chembl | Q8IYL6 | Lanosterol synthase (Oxidosqualene--lanosterol cyclase) (2,3-epoxysqualene--lanosterol cyclase) (OSC)                                                        |
| ERM_STRPN   | chembl | P21236 | rRNA adenine N-6-methyltransferase (Macrolide-lincosamide-streptogramin B resistance protein) (ErmAM)                                                        |
| ERR1_HUMAN  | chembl | Q14514 | Steroid hormone receptor ERR1 (Estrogen-related receptor, alpha) (ERR-alpha) (Estrogen receptor-like 1)                                                      |

|             |        |        |                                                                                                                                                                                                                                                                 |
|-------------|--------|--------|-----------------------------------------------------------------------------------------------------------------------------------------------------------------------------------------------------------------------------------------------------------------|
| ERR2_HUMAN  | chembl | O95718 | Steroid hormone receptor ERR2 (Estrogen-related receptor, beta) (ERR-beta) (Estrogen receptor-like 2) (ERR beta-2)                                                                                                                                              |
| ESR1_BOVIN  | chembl | Q6QIS5 | Estrogen receptor (ER) (Estradiol receptor) (ER-alpha)                                                                                                                                                                                                          |
| ESR1_MOUSE  | chembl | Q9QY52 | Estrogen receptor (ER) (Estradiol receptor) (ER-alpha)                                                                                                                                                                                                          |
| ESR1_RAT    | chembl | P06211 | Estrogen receptor (ER) (Estradiol receptor) (ER-alpha)                                                                                                                                                                                                          |
| ESR2_MOUSE  | chembl | O70519 | Estrogen receptor beta (ER-beta)                                                                                                                                                                                                                                |
| ESR2_RAT    | chembl | Q62986 | Estrogen receptor beta (ER-beta)                                                                                                                                                                                                                                |
| EST1_HUMAN  | chembl | P82127 | Liver carboxylesterase 1 precursor (Acyl coenzyme A:cholesterol acyltransferase) (ACAT) (Monocyte/macrophage serine esterase) (HMSE) (Serine esterase 1) (Brain carboxylesterase hBr1) (Triacylglycerol hydrolase) (TGH) (Egasyn) carboxylesterase [Sus scrofa] |
| EST1_PIG    | chembl | Q29550 | Carboxylesterase 2 precursor (CE-2) (hCE-2)                                                                                                                                                                                                                     |
| EST2_HUMAN  | chembl | Q8TCP8 | Fructose-1,6-bisphosphatase (D-fructose-1,6-bisphosphate 1-phosphohydrolase) (FBPase)                                                                                                                                                                           |
| F16P1_PIG   | chembl | P00636 | Fructose-1,6-bisphosphatase isozyme 2 (D-fructose-1,6-bisphosphate 1-phosphohydrolase) (FBPase)                                                                                                                                                                 |
| F16P2_HUMAN | chembl | Q6FI53 | Coagulation factor X precursor (Stuart factor)                                                                                                                                                                                                                  |
| FA10_BOVIN  | chembl | P00743 | Coagulation factor X precursor (Stuart factor)                                                                                                                                                                                                                  |
| FA10_RABIT  | chembl | O19045 | Coagulation factor X precursor (Stuart factor)                                                                                                                                                                                                                  |
| FA10_RAT    | chembl | Q63207 | Coagulation factor X precursor (Stuart factor)                                                                                                                                                                                                                  |
| FA11_HUMAN  | chembl | Q4W5C2 | Coagulation factor XI precursor (Plasma thromboplastin antecedent) (PTA) (FXI)                                                                                                                                                                                  |
| FA5_HUMAN   | chembl | Q6UPU6 | Coagulation factor V precursor (Activated protein C cofactor)                                                                                                                                                                                                   |
| FA9_HUMAN   | chembl | P00740 | Coagulation factor IX precursor (Christmas factor) (Plasma thromboplastin component) (PTC)                                                                                                                                                                      |
| FAAH1_MOUSE | chembl | Q922S0 | Fatty-acid amide hydrolase (Oleamide hydrolase) (Anandamide amidohydrolase)                                                                                                                                                                                     |
| FAAH1_RAT   | chembl | Q5BKA3 | Fatty-acid amide hydrolase (Oleamide hydrolase) (Anandamide amidohydrolase)                                                                                                                                                                                     |
| FABH_ENTFA  | chembl | Q820T1 | 3-oxoacyl-[acyl-carrier-protein] synthase III (Beta-ketoacyl-ACP synthase III) (KAS III)                                                                                                                                                                        |
| FABI_ECOLI  | chembl | P0AEK4 | Enoyl-[acyl-carrier-protein] reductase [NADH] (NADH-dependent enoyl-ACP reductase)                                                                                                                                                                              |

|             |        |        |                                                                                                                                                                                                                                                                 |
|-------------|--------|--------|-----------------------------------------------------------------------------------------------------------------------------------------------------------------------------------------------------------------------------------------------------------------|
| FABP4_HUMAN | chembl | Q6IBA1 | Fatty acid-binding protein, adipocyte (AFABP) (Adipocyte lipid-binding protein) (ALBP) (A-FABP)                                                                                                                                                                 |
| FABP5_HUMAN | chembl | Q01469 | Fatty acid-binding protein, epidermal (E-FABP) (Psoriasis-associated fatty acid-binding protein homolog) (PA-FABP)                                                                                                                                              |
| FABPH_HUMAN | chembl | B2RAB6 | Fatty acid-binding protein, heart (H-FABP) (Heart-type fatty acid-binding protein) (Muscle fatty acid-binding protein) (M-FABP) (Mammary-derived growth inhibitor) (MDGI)                                                                                       |
| FAK1_HUMAN  | chembl | Q9UD85 | Focal adhesion kinase 1 (FADK 1) (pp125FAK) (Protein-tyrosine kinase 2)                                                                                                                                                                                         |
| FAS_RAT     | chembl | O09190 | Fatty acid synthase (EC 2.3.1.85) [Includes [Acyl-carrier-protein] S- acetyltransferase (EC 2.3.1.38), [Acyl-carrier-protein] S- malonyltransferase (EC 2.3.1.39), 3-oxoacyl-[acyl-carrier-protein] synthase (EC 2.3.1.41), 3-oxoacyl-[acyl-carrier-protein...] |
| FDFT_HUMAN  | chembl | P37268 | Farnesyl-diphosphate farnesyltransferase (Squalene synthetase) (SQS) (SS) (FPP:FPP farnesyltransferase)                                                                                                                                                         |
| FEN1_HUMAN  | chembl | P39748 | Flap endonuclease-1 (Maturation factor 1) (MF1)                                                                                                                                                                                                                 |
| FGFR1_MOUSE | chembl | Q80T10 | Basic fibroblast growth factor receptor 1 precursor (FGFR-1) (bFGF-R) (MFR)                                                                                                                                                                                     |
| FGFR2_MOUSE | chembl | Q61342 | Fibroblast growth factor receptor 2 precursor (FGFR-2) (Keratinocyte growth factor receptor)                                                                                                                                                                    |
| FGFR3_HUMAN | chembl | Q16294 | Fibroblast growth factor receptor 3 precursor (FGFR-3)                                                                                                                                                                                                          |
| FGFR3_MOUSE | chembl | Q61851 | Fibroblast growth factor receptor 3 precursor (FGFR-3) (Heparin-binding growth factor receptor)                                                                                                                                                                 |
| FGFR4_HUMAN | chembl | Q8TDA0 | Fibroblast growth factor receptor 4 precursor (FGFR-4)                                                                                                                                                                                                          |
| FGFR4_MOUSE | chembl | Q03142 | Fibroblast growth factor receptor 4 precursor (FGFR-4) (Protein-tyrosine kinase receptor MPK-11)                                                                                                                                                                |
| FIBA_HUMAN  | chembl | Q9UCH2 | Fibrinogen alpha/alpha-E chain precursor [Contains: (Fibrinopeptide A) ]                                                                                                                                                                                        |
| FIBB_HUMAN  | chembl | B2R7G3 | Fibrinogen beta chain precursor [Contains: (Fibrinopeptide B) ]                                                                                                                                                                                                 |
| FIBG_HUMAN  | chembl | Q53Y18 | Fibrinogen gamma chain precursor (PRO2061)                                                                                                                                                                                                                      |
| FKB14_HUMAN | chembl | Q9NWM8 | FK506 binding protein 14 precursor (Peptidyl-prolyl cis-trans isomerase) (PPLase) (Rotamase) (22 kDa)                                                                                                                                                           |

|             |        |        |                                                                                                                                                                                                                                                                   |
|-------------|--------|--------|-------------------------------------------------------------------------------------------------------------------------------------------------------------------------------------------------------------------------------------------------------------------|
| FKB1A_HUMAN | chembl | Q6LEU3 | FK506-binding protein) (FKBP-22)<br>(UNQ322/PRO381)<br>FK506-binding protein 1A (Peptidyl-prolyl cis-trans isomerase) (PPlase) (Rotamase) (12 kDa FKBP) (FKBP-12) (Immunophilin FKBP12)                                                                           |
| FKB1A_RAT   | chembl | P97533 | FK506-binding protein 1A (Peptidyl-prolyl cis-trans isomerase) (PPlase) (Rotamase) (12 kDa FKBP) (FKBP-12) (Immunophilin FKBP12)                                                                                                                                  |
| FKB1B_HUMAN | chembl | P68106 | FK506-binding protein 1B (Peptidyl-prolyl cis-trans isomerase 1B) (PPlase 1B) (Rotamase 1B) (12.6 kDa FKBP) (FKBP-12.6) (Immunophilin FKBP12.6) (h-FKBP-12)                                                                                                       |
| FKBP3_HUMAN | chembl | Q00688 | FK506-binding protein 3 (Peptidyl-prolyl cis-trans isomerase) (PPlase) (Rotamase) (25 kDa FKBP) (FKBP-25) (Rapamycin-selective 25 kDa immunophilin)                                                                                                               |
| FKBP4_HUMAN | chembl | Q9UCV7 | FK506-binding protein 4 (Peptidyl-prolyl cis-trans isomerase) (PPlase) (Rotamase) (p59 protein) (HSP binding immunophilin) (HBI) (FKBP52 protein) (52 kDa FK506 binding protein) (FKBP59)                                                                         |
| FNTA_BOVIN  | chembl | P29702 | Protein<br>farnesyltransferase/geranylgeranyltransferase type I alpha subunit (EC 2.5.1.59) (CAAX farnesyltransferase alpha subunit) (Ras proteins prenyltransferase alpha) (FTase-alpha) (Type I protein geranyl-geranyltransferase alpha subunit) (GGTase-I-... |
| FNTA_MOUSE  | chembl | Q921F7 | Protein<br>farnesyltransferase/geranylgeranyltransferase type I alpha subunit (EC 2.5.1.59) (CAAX farnesyltransferase alpha subunit) (Ras proteins prenyltransferase alpha) (FTase-alpha) (Type I protein geranyl-geranyltransferase alpha subunit) (GGTase-I-... |
| FNTA_RAT    | chembl | Q04631 | Protein<br>farnesyltransferase/geranylgeranyltransferase type I alpha subunit (EC 2.5.1.59) (CAAX farnesyltransferase alpha subunit) (Ras proteins prenyltransferase alpha) (FTase-alpha) (Type I protein geranyl-geranyltransferase alpha subunit)               |



|             |        |        |                                                                                                                                                                                                                                                                                    |
|-------------|--------|--------|------------------------------------------------------------------------------------------------------------------------------------------------------------------------------------------------------------------------------------------------------------------------------------|
| FNTA_YEAST  | chembl | P29703 | (GGTase-I-...<br>Protein<br>farnesyltransferase/geranylgeranyltransferase type I alpha subunit (EC 2.5.1.59) (CAAX farnesyltransferase alpha subunit) (Ras proteins prenyltransferase alpha) (FTase-alpha) (Type I protein geranyl-geranyltransferase alpha subunit) (GGTase-I-... |
| FNTB_BOVIN  | chembl | Q9TS25 | Protein farnesyltransferase beta subunit (CAAX farnesyltransferase beta subunit) (RAS proteins prenyltransferase beta) (FTase-beta)                                                                                                                                                |
| FNTB_HUMAN  | chembl | P49356 | Protein farnesyltransferase beta subunit (CAAX farnesyltransferase beta subunit) (RAS proteins prenyltransferase beta) (FTase-beta)                                                                                                                                                |
| FNTB_MOUSE  | chembl | Q8K211 | farnesyltransferase, CAAX box, beta [Mus musculus]                                                                                                                                                                                                                                 |
| FNTB_RAT    | chembl | Q02293 | Protein farnesyltransferase beta subunit (CAAX farnesyltransferase beta subunit) (RAS proteins prenyltransferase beta) (FTase-beta)                                                                                                                                                |
| FNTB_YEAST  | chembl | Q12422 | Protein farnesyltransferase beta subunit (CAAX farnesyltransferase beta subunit) (RAS proteins prenyltransferase beta) (FTase-beta)                                                                                                                                                |
| FOLB_STAAM  | chembl | P64145 | Dihydroneopterin aldolase (DHNA)                                                                                                                                                                                                                                                   |
| FOLB_STAAN  | chembl | P64146 | Dihydroneopterin aldolase (DHNA)                                                                                                                                                                                                                                                   |
| FOLB_STAAW  | chembl | P64147 | Dihydroneopterin aldolase (DHNA)                                                                                                                                                                                                                                                   |
| FOLC_MOUSE  | chembl | P48760 | Folylpolyglutamate synthase, mitochondrial precursor (Folylpoly-gamma-glutamate synthetase) (FPGS) (Tetrahydrofolylpolyglutamate synthase)                                                                                                                                         |
| FOLH1_RAT   | chembl | Q547B6 | Glutamate carboxypeptidase II (Membrane glutamate carboxypeptidase) (mGCP) (N-acetylated-alpha-linked acidic dipeptidase I) (NAALADase I) (Pteroylpoly-gamma-glutamate carboxypeptidase) (Folylpoly-gamma-glutamate carboxypeptidase) (FGCP) (Folate hydrol...                     |
| FOLR1_HUMAN | chembl | P15328 | Folate receptor alpha precursor (FR-alpha) (Folate receptor 1) (Folate receptor, adult) (Adult folate-binding protein) (FBP) (Ovarian tumor-associated antigen MOv18) (KB cells FBP)                                                                                               |
| FPPS_HUMAN  | chembl | Q96G29 | Farnesyl pyrophosphate synthetase (FPP synthetase) (FPS) (Farnesyl diphosphate                                                                                                                                                                                                     |

|             |        |        |                                                                                                                                                                                                                                                                                  |
|-------------|--------|--------|----------------------------------------------------------------------------------------------------------------------------------------------------------------------------------------------------------------------------------------------------------------------------------|
| FRAP_HUMAN  | chembl | Q96QG3 | synthetase) (Dimethylallyltranstransferase) ()<br>(Geranyltranstransferase)<br>FKBP12-rapamycin complex-associated protein<br>(FK506-binding protein 12-rapamycin complex-<br>associated protein 1) (Rapamycin target protein)<br>(RAPT1) (Mammalian target of rapamycin) (MTOR) |
| FRK_HUMAN   | chembl | Q9NTR5 | Tyrosine-protein kinase FRK (EC 2.7.10.2) (Nuclear<br>tyrosine protein kinase RAK).                                                                                                                                                                                              |
| FUCO_HUMAN  | chembl | Q3LID0 | Tissue alpha-L-fucosidase precursor (Alpha-L-<br>fucosidase I) (Alpha-L-fucoside fucohydrolase)                                                                                                                                                                                  |
| FURIN_HUMAN | chembl | Q9UCZ5 | Furin precursor (Paired basic amino acid residue<br>cleaving enzyme) (PACE) (Dibasic processing<br>enzyme)                                                                                                                                                                       |
| FUT6_HUMAN  | chembl | A6NEX0 | Alpha-(1,3)-fucosyltransferase (Galactoside 3-L-<br>fucosyltransferase) (Fucosyltransferase 6) (FUCT-<br>VI)                                                                                                                                                                     |
| FYN_HUMAN   | chembl | P06241 | Proto-oncogene tyrosine-protein kinase FYN (P59-<br>FYN) (SYN) (SLK)                                                                                                                                                                                                             |
| G3PC_LEIME  | chembl | Q01558 | Glyceraldehyde-3-phosphate dehydrogenase,<br>cytosolic (GAPDH)                                                                                                                                                                                                                   |
| G3P_HUMAN   | chembl | P04406 | Glyceraldehyde-3-phosphate dehydrogenase, liver<br>(GAPDH)                                                                                                                                                                                                                       |
| G6PC_HUMAN  | chembl | P35575 | Glucose-6-phosphatase (G6Pase) (G-6-Pase)                                                                                                                                                                                                                                        |
| GABR1_HUMAN | chembl | O95468 | Gamma-aminobutyric acid type B receptor, subunit<br>1 precursor (GABA-B receptor 1) (GABA-B-R1)<br>(Gb1)                                                                                                                                                                         |
| GABR2_HUMAN | chembl | Q5VXZ2 | Gamma-aminobutyric acid type B receptor, subunit<br>2 precursor (GABA-B receptor 2) (GABA-B-R2)<br>(Gb2) (GABABR2) (G-protein coupled receptor 51)<br>(GPR 51) (HG20)                                                                                                            |
| GABR2_RAT   | chembl | Q9JK36 | Gamma-aminobutyric acid type B receptor, subunit<br>2 precursor (GABA-B receptor 2) (GABA-B-R2)<br>(Gb2) (GABABR2)                                                                                                                                                               |
| GAK_HUMAN   | chembl | Q9BVY6 | Cyclin G-associated kinase                                                                                                                                                                                                                                                       |
| GALR3_HUMAN | chembl | O60755 | Galanin receptor type 3 (GAL3-R) (GALR3)                                                                                                                                                                                                                                         |
| GANAB_HUMAN | chembl | Q14697 | Neutral alpha-glucosidase AB precursor<br>(Glucosidase II alpha subunit)                                                                                                                                                                                                         |
| GANC_HUMAN  | chembl | Q8IZM4 | Neutral alpha-glucosidase C                                                                                                                                                                                                                                                      |
| GASR_BOVIN  | chembl | Q2KI20 | Gastrin/cholecystokinin type B receptor (CCK-B<br>receptor) (CCK-BR)                                                                                                                                                                                                             |

|             |        |        |                                                                               |
|-------------|--------|--------|-------------------------------------------------------------------------------|
| GASR_HUMAN  | chembl | A8K7P9 | Gastrin/cholecystokinin type B receptor (CCK-B receptor) (CCK-BR)             |
| GASR_MOUSE  | chembl | P56481 | Gastrin/cholecystokinin type B receptor (CCK-B receptor) (CCK-BR)             |
| GASR_RAT    | chembl | P30553 | Gastrin/cholecystokinin type B receptor (CCK-B receptor) (CCK-BR)             |
| GATC_STRP1  | chembl | Q48WZ9 | Glutamyl-tRNA(Gln) amidotransferase subunit C (Glu-ADT subunit C)             |
| GBA2_HUMAN  | chembl | Q96A51 | bile acid beta-glucosidase [Homo sapiens]                                     |
| GBA3_HUMAN  | chembl | Q8NHT8 | cytosolic beta-glucosidase [Homo sapiens]                                     |
| GBRA1_BOVIN | chembl | P08219 | Gamma-aminobutyric-acid receptor alpha-1 subunit precursor (GABA(A) receptor) |
| GBRA1_HUMAN | chembl | Q8N629 | Gamma-aminobutyric-acid receptor alpha-1 subunit precursor (GABA(A) receptor) |
| GBRA1_MOUSE | chembl | P62812 | Gamma-aminobutyric-acid receptor alpha-1 subunit precursor (GABA(A) receptor) |
| GBRA2_BOVIN | chembl | P10063 | Gamma-aminobutyric-acid receptor alpha-2 subunit precursor (GABA(A) receptor) |
| GBRA2_HUMAN | chembl | P47869 | Gamma-aminobutyric-acid receptor alpha-2 subunit precursor (GABA(A) receptor) |
| GBRA2_MOUSE | chembl | P26048 | Gamma-aminobutyric-acid receptor alpha-2 subunit precursor (GABA(A) receptor) |
| GBRA3_BOVIN | chembl | P10064 | Gamma-aminobutyric-acid receptor alpha-3 subunit precursor (GABA(A) receptor) |
| GBRA3_HUMAN | chembl | Q8TAF9 | Gamma-aminobutyric-acid receptor alpha-3 subunit precursor (GABA(A) receptor) |
| GBRA3_MOUSE | chembl | P26049 | Gamma-aminobutyric-acid receptor alpha-3 subunit precursor (GABA(A) receptor) |
| GBRA3_RAT   | chembl | P20236 | Gamma-aminobutyric-acid receptor alpha-3 subunit precursor (GABA(A) receptor) |
| GBRA4_BOVIN | chembl | Q08E47 | Gamma-aminobutyric-acid receptor alpha-4 subunit precursor (GABA(A) receptor) |
| GBRA4_HUMAN | chembl | Q8IYR7 | Gamma-aminobutyric-acid receptor alpha-4 subunit precursor (GABA(A) receptor) |
| GBRA4_MOUSE | chembl | Q9D6F4 | Gamma-aminobutyric-acid receptor alpha-4 subunit precursor (GABA(A) receptor) |
| GBRA4_RAT   | chembl | P28471 | Gamma-aminobutyric-acid receptor alpha-4 subunit precursor (GABA(A) receptor) |
| GBRA5_HUMAN | chembl | Q9NYT5 | Gamma-aminobutyric-acid receptor alpha-5 subunit precursor (GABA(A) receptor) |

|             |        |        |                                                                               |
|-------------|--------|--------|-------------------------------------------------------------------------------|
| GBRA5_MOUSE | chembl | Q8BHJ7 | gamma-aminobutyric acid (GABA-A) receptor, subunit alpha 5 [Mus musculus]     |
| GBRA5_RAT   | chembl | P19969 | Gamma-aminobutyric-acid receptor alpha-5 subunit precursor (GABA(A) receptor) |
| GBRA6_HUMAN | chembl | Q4VAV2 | Gamma-aminobutyric-acid receptor alpha-6 subunit precursor (GABA(A) receptor) |
| GBRA6_MOUSE | chembl | Q9R0V4 | Gamma-aminobutyric-acid receptor alpha-6 subunit precursor (GABA(A) receptor) |
| GBRA6_RAT   | chembl | P30191 | Gamma-aminobutyric-acid receptor alpha-6 subunit precursor (GABA(A) receptor) |
| GBRB1_BOVIN | chembl | P08220 | Gamma-aminobutyric-acid receptor beta-1 subunit precursor (GABA(A) receptor)  |
| GBRB1_HUMAN | chembl | Q8TBK3 | Gamma-aminobutyric-acid receptor beta-1 subunit precursor (GABA(A) receptor)  |
| GBRB1_MOUSE | chembl | P50571 | Gamma-aminobutyric-acid receptor beta-1 subunit precursor (GABA(A) receptor)  |
| GBRB1_RAT   | chembl | P15431 | Gamma-aminobutyric-acid receptor beta-1 subunit precursor (GABA(A) receptor)  |
| GBRB2_HUMAN | chembl | A8K1A0 | Gamma-aminobutyric-acid receptor beta-2 subunit precursor (GABA(A) receptor)  |
| GBRB2_RAT   | chembl | P63138 | Gamma-aminobutyric-acid receptor beta-2 subunit precursor (GABA(A) receptor)  |
| GBRB3_HUMAN | chembl | Q14352 | Gamma-aminobutyric-acid receptor beta-3 subunit precursor (GABA(A) receptor)  |
| GBRB3_MOUSE | chembl | Q3UHR3 | Gamma-aminobutyric-acid receptor beta-3 subunit precursor (GABA(A) receptor)  |
| GBRB3_RAT   | chembl | P63079 | Gamma-aminobutyric-acid receptor beta-3 subunit precursor (GABA(A) receptor)  |
| GBRB_MUSDO  | chembl | Q75NA5 | GABA receptor subunit (Fragment).                                             |
| GBRD_HUMAN  | chembl | Q8N4N9 | Gamma-aminobutyric-acid receptor delta subunit precursor (GABA(A) receptor)   |
| GBRD_MOUSE  | chembl | P22933 | Gamma-aminobutyric-acid receptor delta subunit precursor (GABA(A) receptor)   |
| GBRD_RAT    | chembl | P18506 | Gamma-aminobutyric-acid receptor delta subunit precursor (GABA(A) receptor)   |
| GBRE_HUMAN  | chembl | O15345 | Gamma-aminobutyric-acid receptor epsilon subunit precursor (GABA(A) receptor) |
| GBRE_RAT    | chembl | Q9ES14 | Gamma-aminobutyric-acid receptor epsilon subunit precursor (GABA(A) receptor) |
| GBRG1_HUMAN | chembl | Q8N1C3 | Gamma-aminobutyric-acid receptor gamma-1                                      |

|             |        |        |                                                                                                            |
|-------------|--------|--------|------------------------------------------------------------------------------------------------------------|
| GBRG1_MOUSE | chembl | Q9R0Y8 | subunit precursor (GABA(A) receptor)                                                                       |
| GBRG1_RAT   | chembl | P23574 | Gamma-aminobutyric-acid receptor gamma-1 subunit precursor (GABA(A) receptor)                              |
| GBRG2_BOVIN | chembl | P22300 | Gamma-aminobutyric-acid receptor gamma-1 subunit precursor (GABA(A) receptor)                              |
| GBRG2_HUMAN | chembl | P18507 | Gamma-aminobutyric-acid receptor gamma-2 subunit precursor (GABA(A) receptor)                              |
| GBRG2_MOUSE | chembl | Q91V50 | Gamma-aminobutyric-acid receptor gamma-2 subunit precursor (GABA(A) receptor)                              |
| GBRG2_RAT   | chembl | P18508 | Gamma-aminobutyric-acid receptor gamma-2 subunit precursor (GABA(A) receptor)                              |
| GBRG3_HUMAN | chembl | Q9HD46 | Gamma-aminobutyric-acid receptor gamma-2 subunit precursor (GABA(A) receptor)                              |
| GBRG3_MOUSE | chembl | P27681 | Gamma-aminobutyric-acid receptor gamma-3 subunit precursor (GABA(A) receptor)                              |
| GBRG3_RAT   | chembl | P28473 | Gamma-aminobutyric-acid receptor gamma-3 subunit precursor (GABA(A) receptor)                              |
| GBRP_HUMAN  | chembl | Q32MJ1 | Gamma-aminobutyric-acid receptor gamma-3 subunit precursor (GABA(A) receptor)                              |
| GBRP_MOUSE  | chembl | Q8QZW7 | Gamma-aminobutyric-acid receptor pi subunit precursor (GABA(A) receptor)                                   |
| GBRP_RAT    | chembl | O09028 | Gamma-aminobutyric-acid receptor pi subunit precursor (GABA(A) receptor)                                   |
| GBRR1_RAT   | chembl | P50572 | Gamma-aminobutyric-acid receptor pi subunit precursor (GABA(A) receptor)                                   |
| GBRR2_RAT   | chembl | P47742 | Gamma-aminobutyric-acid receptor rho-1 subunit precursor (GABA(A) receptor)                                |
| GBRR3_RAT   | chembl | P50573 | Gamma-aminobutyric-acid receptor rho-2 subunit precursor (GABA(A) receptor)                                |
| GBRT_HUMAN  | chembl | Q32MB4 | Gamma-aminobutyric-acid receptor rho-3 subunit precursor (GABA(A) receptor)                                |
| GBRT_MOUSE  | chembl | Q9JLF1 | Gamma-aminobutyric-acid receptor theta subunit precursor (GABA(A) receptor)                                |
| GCR_RAT     | chembl | Q8R463 | Gamma-aminobutyric-acid receptor theta subunit precursor (GABA(A) receptor)                                |
| GGPPS_HUMAN | chembl | O95749 | Glucocorticoid receptor (GR)                                                                               |
|             |        |        | Geranylgeranyl pyrophosphate synthetase (GGPP synthetase) (GGPPSase) (Geranylgeranyl diphosphate synthase) |
|             |        |        | (Dimethylallyltranstransferase) ()                                                                         |

|             |        |        |                                                                                                                                                                                   |
|-------------|--------|--------|-----------------------------------------------------------------------------------------------------------------------------------------------------------------------------------|
| GHSR_MOUSE  | chembl | Q8BW8  | (Geranyltranstransferase) ()<br>(Farnesyltranstransferase)<br>Growth hormone secretagogue receptor type 1<br>(GHS-R) (GH-releasing peptide receptor) (GHRP)<br>(Ghrelin receptor) |
| GIPR_HUMAN  | chembl | Q9UPI1 | Gastric inhibitory polypeptide receptor precursor<br>(GIP-R) (Glucose-dependent insulinotropic<br>polypeptide receptor)                                                           |
| GLCM_HUMAN  | chembl | Q9UMJ8 | Glucosylceramidase precursor (Beta-<br>glucocerebrosidase) (Acid beta-glucosidase) (D-<br>glucosyl-N-acylsphingosine glucohydrolase)<br>(Alglucerase) (Imiglucerase)              |
| GLCM_MOUSE  | chembl | P17439 | Glucosylceramidase precursor (Beta-<br>glucocerebrosidase) (Acid beta-glucosidase) (D-<br>glucosyl-N-acylsphingosine glucohydrolase)                                              |
| GLNA_ECOLI  | chembl | P0A9C5 | Glutamine synthetase (Glutamate--ammonia ligase)                                                                                                                                  |
| GLP1R_HUMAN | chembl | Q2M229 | Glucagon-like peptide 1 receptor precursor (GLP-1<br>receptor) (GLP-1-R) (GLP-1R)                                                                                                 |
| GLRA2_RAT   | chembl | Q91W28 | Glycine receptor alpha-2* chain precursor<br>(Neonatal isoform) (Glycine receptor strychnine<br>binding subunit)                                                                  |
| GLRA3_RAT   | chembl | P24524 | Glycine receptor alpha-3 chain precursor                                                                                                                                          |
| GLRB_RAT    | chembl | P20781 | Glycine receptor beta chain precursor (Glycine<br>receptor 58 kDa subunit)                                                                                                        |
| GLR_MOUSE   | chembl | Q63960 | Glucagon receptor precursor (GL-R)                                                                                                                                                |
| GLR_RAT     | chembl | P30082 | Glucagon receptor precursor (GL-R)                                                                                                                                                |
| GLUCB_CAEEL | chembl | Q17328 | glutamate-gated chloride channel (49.8 kD) (glc-2)<br>[Caenorhabditis elegans]                                                                                                    |
| GNRHR_RAT   | chembl | P30969 | Gonadotropin-releasing hormone receptor (GnRH<br>receptor) (GnRH-R)                                                                                                               |
| GPR44_MOUSE | chembl | Q9Z2J6 | Putative G-protein coupled receptor 44<br>(Chemoattractant receptor- homologous molecule<br>expressed on Th2 cells) (CD294 antigen).                                              |
| GRAM3_HUMAN | chembl | Q96HH9 | HCV NS3-transactivated protein 2 [Homo sapiens]                                                                                                                                   |
| GRB2_HUMAN  | chembl | P62993 | growth factor receptor-bound protein 2 isoform 2<br>[Homo sapiens]                                                                                                                |
| GRIA1_HUMAN | chembl | Q2NKM6 | Glutamate receptor 1 precursor (GluR-1) (GluR-A)<br>(GluR-K1) (Glutamate receptor ionotropic, AMPA 1)                                                                             |
| GRIA1_MOUSE | chembl | P23818 | glutamate receptor, ionotropic, AMPA1 (alpha 1)<br>[Mus musculus]                                                                                                                 |

|             |        |        |                                                                                                                                      |
|-------------|--------|--------|--------------------------------------------------------------------------------------------------------------------------------------|
| GRIA2_HUMAN | chembl | Q96FP6 | Glutamate receptor 2 precursor (GluR-2) (GluR-B) (GluR-K2) (Glutamate receptor ionotropic, AMPA 2)                                   |
| GRIA2_MOUSE | chembl | Q61604 | Glutamate receptor 2 precursor (GluR-2) (GluR-B) (GluR-K2) (Glutamate receptor ionotropic, AMPA 2)                                   |
| GRIA2_RAT   | chembl | Q9R174 | Glutamate receptor 2 precursor (GluR-2) (GluR-B) (GluR-K2) (Glutamate receptor ionotropic, AMPA 2)                                   |
| GRIA3_HUMAN | chembl | Q4VXD5 | Glutamate receptor 3 precursor (GluR-3) (GluR-C) (GluR-K3) (Glutamate receptor ionotropic, AMPA 3)                                   |
| GRIA3_MOUSE | chembl | Q5DTJ0 | glutamate receptor, ionotropic, AMPA3 (alpha 3) [Mus musculus]                                                                       |
| GRIA3_RAT   | chembl | P19492 | Glutamate receptor 3 precursor (GluR-3) (GluR-C) (GluR-K3) (Glutamate receptor ionotropic, AMPA 3)                                   |
| GRIA4_HUMAN | chembl | P48058 | Glutamate receptor 4 precursor (GluR-4) (GluR4) (GluR-D) (Glutamate receptor ionotropic, AMPA 4)                                     |
| GRIA4_MOUSE | chembl | Q9Z2W8 | glutamate receptor, ionotropic, AMPA4 (alpha 4) [Mus musculus]                                                                       |
| GRIA4_RAT   | chembl | P19493 | Glutamate receptor 4 precursor (GluR-4) (GluR4) (GluR-D) (Glutamate receptor ionotropic, AMPA 4)                                     |
| GRID1_HUMAN | chembl | Q9ULK0 | Glutamate receptor delta-1 subunit precursor (GluR delta-1)                                                                          |
| GRIK1_RAT   | chembl | P22756 | Glutamate receptor, ionotropic kainate 1 precursor (Glutamate receptor 5) (GluR-5) (GluR5)                                           |
| GRIK2_HUMAN | chembl | Q8WWS1 | Glutamate receptor, ionotropic kainate 2 precursor (Glutamate receptor 6) (GluR-6) (GluR6) (Excitatory amino acid receptor 4) (EAA4) |
| GRIK2_RAT   | chembl | P42260 | Glutamate receptor, ionotropic kainate 2 precursor (Glutamate receptor 6) (GluR-6) (GluR6)                                           |
| GRIK3_HUMAN | chembl | Q16136 | Glutamate receptor, ionotropic kainate 3 precursor (Glutamate receptor 7) (GluR-7) (GluR7) (Excitatory amino acid receptor 5) (EAA5) |
| GRIK3_RAT   | chembl | O35420 | Glutamate receptor, ionotropic kainate 3 precursor (Glutamate receptor 7) (GluR-7) (GluR7)                                           |
| GRIK4_HUMAN | chembl | Q16099 | Glutamate receptor, ionotropic kainate 4 precursor (Glutamate receptor KA-1) (KA1) (Excitatory amino acid receptor 1) (EAA1)         |
| GRIK4_RAT   | chembl | Q62642 | Glutamate receptor, ionotropic kainate 4 precursor (Glutamate receptor KA-1) (KA1)                                                   |
| GRIK5_HUMAN | chembl | Q16478 | Glutamate receptor, ionotropic kainate 5 precursor (Glutamate receptor KA-2) (KA2) (Excitatory amino acid receptor 2) (EAA2)         |

|             |        |        |                                                                                              |
|-------------|--------|--------|----------------------------------------------------------------------------------------------|
| GRIK5_RAT   | chembl | Q63273 | Glutamate receptor, ionotropic kainate 5 precursor (Glutamate receptor KA-2) (KA2)           |
| GRL1A_RAT   | chembl | Q91XQ4 | glutamate receptor, ionotropic, N-methyl D-aspartate-like 1A [Rattus norvegicus]             |
| GRM1_HUMAN  | chembl | Q14757 | Metabotropic glutamate receptor 1 precursor (mGluR1)                                         |
| GRM1_MOUSE  | chembl | Q6AXG4 | Metabotropic glutamate receptor 1 precursor (mGluR1)                                         |
| GRM1_RAT    | chembl | P23385 | Metabotropic glutamate receptor 1 precursor (mGluR1)                                         |
| GRM2_HUMAN  | chembl | Q14CU5 | Metabotropic glutamate receptor 2 precursor (mGluR2)                                         |
| GRM2_RAT    | chembl | P31421 | Metabotropic glutamate receptor 2 precursor (mGluR2)                                         |
| GRM3_MOUSE  | chembl | Q14DJ9 | Metabotropic glutamate receptor 3 precursor (mGluR3)                                         |
| GRM3_RAT    | chembl | P31422 | Metabotropic glutamate receptor 3 precursor (mGluR3)                                         |
| GRM4_HUMAN  | chembl | Q14833 | Metabotropic glutamate receptor 4 precursor (mGluR4)                                         |
| GRM5_HUMAN  | chembl | P41594 | Metabotropic glutamate receptor 5 precursor (mGluR5)                                         |
| GRM6_HUMAN  | chembl | O15303 | Metabotropic glutamate receptor 6 precursor (mGluR6)                                         |
| GRM7_HUMAN  | chembl | Q8NFS2 | Metabotropic glutamate receptor 7 precursor (mGluR7)                                         |
| GRM7_MOUSE  | chembl | Q68ED2 | glutamate receptor, metabotropic 7 [Mus musculus]                                            |
| GRM7_RAT    | chembl | P35400 | Metabotropic glutamate receptor 7 precursor (mGluR7)                                         |
| GRM8_MOUSE  | chembl | P47743 | Metabotropic glutamate receptor 8 precursor (mGluR8)                                         |
| GRM8_RAT    | chembl | P70579 | Metabotropic glutamate receptor 8 precursor (mGluR8)                                         |
| GRPR_HUMAN  | chembl | B2R910 | Gastrin-releasing peptide receptor (GRP-R) (GRP-preferring bombesin receptor)                |
| GSK3B_HUMAN | chembl | Q9BWH3 | Glycogen synthase kinase-3 beta (GSK-3 beta)                                                 |
| GSK3B_RAT   | chembl | P18266 | Glycogen synthase kinase-3 beta (GSK-3 beta) (Factor A) (FA)                                 |
| GSTA1_HUMAN | chembl | Q14750 | Glutathione S-transferase A1 (GTH1) (HA subunit 1) (GST-epsilon) (GSTA1-1) (GST class-alpha) |



|             |        |        |                                                                                                                                                                      |
|-------------|--------|--------|----------------------------------------------------------------------------------------------------------------------------------------------------------------------|
| GSTP1_HUMAN | chembl | Q5TZY3 | Glutathione S-transferase P (GST class-pi) (GSTP1-1)                                                                                                                 |
| GTR1_HUMAN  | chembl | O75535 | Solute carrier family 2, facilitated glucose transporter, member 1 (Glucose transporter type 1, erythrocyte/brain) (HepG2 glucose transporter)                       |
| GYRB_ECOLI  | chembl | Q2M811 | DNA gyrase subunit B                                                                                                                                                 |
| HDA10_HUMAN | chembl | Q9UGX2 | Histone deacetylase 10 (HD10)                                                                                                                                        |
| HDA11_HUMAN | chembl | Q9H6I7 | Histone deacetylase 11 (HD11)                                                                                                                                        |
| HDAC1_CHICK | chembl | P56517 | Histone deacetylase 1 (HD1)                                                                                                                                          |
| HDAC2_CHICK | chembl | P56519 | Histone deacetylase 2 (HD2)                                                                                                                                          |
| HDAC2_HUMAN | chembl | Q92769 | Histone deacetylase 2 (HD2)                                                                                                                                          |
| HDAC2_MOUSE | chembl | P70288 | Histone deacetylase 2 (HD2) (YY1 transcription factor binding protein)                                                                                               |
| HDAC3_CHICK | chembl | P56520 | Histone deacetylase 3 (HD3)                                                                                                                                          |
| HDAC3_HUMAN | chembl | Q9UEI5 | Histone deacetylase 3 (HD3) (RPD3-2) (SMAP45)                                                                                                                        |
| HDAC3_RAT   | chembl | Q99PA0 | histone deacetylase 3 [Rattus norvegicus]                                                                                                                            |
| HDAC4_CHICK | chembl | P83038 | Histone deacetylase 4 (HD4)                                                                                                                                          |
| HDAC4_RAT   | chembl | Q99P99 | histone deacetylase 4 [Rattus norvegicus]                                                                                                                            |
| HDAC5_HUMAN | chembl | O60528 | Histone deacetylase 5 (HD5) (Antigen NY-CO-9)                                                                                                                        |
| HDAC5_MOUSE | chembl | Q9Z2V6 | Histone deacetylase 5 (HD5) (Histone deacetylase mHDA1)                                                                                                              |
| HDAC6_MOUSE | chembl | Q9Z2V5 | Histone deacetylase 6 (HD6) (Histone deacetylase mHDA2)                                                                                                              |
| HDAC7_HUMAN | chembl | Q6W9G7 | Histone deacetylase 7a (HD7a)                                                                                                                                        |
| HDAC8_MOUSE | chembl | Q3V270 | Histone deacetylase 8 (HD8)                                                                                                                                          |
| HDAC9_HUMAN | chembl | Q86SL1 | Histone deacetylase 9 (HD9) (HD7B) (HD7)                                                                                                                             |
| HG2A_HUMAN  | chembl | Q8WLP6 | HLA class II histocompatibility antigen gamma chain (HLA-DR antigens- associated invariant chain) (Ia antigen-associated invariant chain) (Ii) (p33) (CD74 antigen). |
| HIF1A_HUMAN | chembl | Q53XP6 | Hypoxia-inducible factor 1 alpha (HIF-1 alpha) (HIF1 alpha) (ARNT interacting protein) (Member of PAS protein 1) (MOP1)                                              |
| HIS7_CRYNE  | chembl | Q5KCM8 | Imidazoleglycerol-phosphate dehydratase (IGPD)                                                                                                                       |
| HIS7_YEAST  | chembl | Q70D78 | Imidazoleglycerol-phosphate dehydratase (IGPD)                                                                                                                       |
| HISX_BRAOC  | chembl | P24226 | Histidinol dehydrogenase, chloroplast precursor (HDH)                                                                                                                |
| HMDH_HUMAN  | chembl | P04035 | 3-hydroxy-3-methylglutaryl-coenzyme A reductase (HMG-CoA reductase)                                                                                                  |

|             |        |        |                                                                                                                                                                                                                                                                |
|-------------|--------|--------|----------------------------------------------------------------------------------------------------------------------------------------------------------------------------------------------------------------------------------------------------------------|
| HMOX1_RAT   | chembl | Q5BK87 | Heme oxygenase 1 (HO-1) (HSP32)                                                                                                                                                                                                                                |
| HMOX2_RAT   | chembl | P23711 | Heme oxygenase 2 (HO-2)                                                                                                                                                                                                                                        |
| HPRT_HUMAN  | chembl | B2R8M9 | Hypoxanthine-guanine phosphoribosyltransferase (HGPRT) (HGPRTase)                                                                                                                                                                                              |
| HPSE_HUMAN  | chembl | Q9Y251 | heparanase [Homo sapiens]                                                                                                                                                                                                                                      |
| HRH1_CAVPO  | chembl | P31389 | Histamine H1 receptor                                                                                                                                                                                                                                          |
| HRH1_RAT    | chembl | P31390 | Histamine H1 receptor                                                                                                                                                                                                                                          |
| HRH2_RAT    | chembl | P25102 | Histamine H2 receptor (H2R) (Gastric receptor I)                                                                                                                                                                                                               |
| HRH3_HUMAN  | chembl | Q4QRI7 | Histamine H3 receptor (HH3R) (G protein-coupled receptor 97)                                                                                                                                                                                                   |
| HRH3_RAT    | chembl | Q9QYN9 | Histamine H3 receptor (HH3R)                                                                                                                                                                                                                                   |
| HRH4_RAT    | chembl | Q91ZY1 | histamine H4 receptor [Rattus norvegicus]                                                                                                                                                                                                                      |
| HS90A_HUMAN | chembl | Q5CAQ6 | Heat shock protein HSP 90-alpha (HSP 86)                                                                                                                                                                                                                       |
| HS90B_HUMAN | chembl | B2R5P0 | Heat shock protein HSP 90-beta (HSP 84) (HSP 90)                                                                                                                                                                                                               |
| HSC82_YEAST | chembl | P15108 | ATP-dependent molecular chaperone HSC82 (Heat shock protein Hsp90 constitutive isoform) (82 kDa heat shock cognate protein)                                                                                                                                    |
| HSP82_YEAST | chembl | P02829 | ATP-dependent molecular chaperone HSP82 (Heat shock protein Hsp90 heat inducible isoform) (82 kDa heat shock protein)                                                                                                                                          |
| HYES_HUMAN  | chembl | Q16764 | Soluble epoxide hydrolase (SEH) (Epoxide hydratase) (Cytosolic epoxide hydrolase) (CEH)                                                                                                                                                                        |
| IBP5_HUMAN  | chembl | P24593 | Insulin-like growth factor binding protein 5 precursor (IGFBP-5) (IBP-5) (IGF-binding protein 5)                                                                                                                                                               |
| IGF1R_HUMAN | chembl | Q9UCC0 | Insulin-like growth factor I receptor precursor (CD221 antigen)                                                                                                                                                                                                |
| IKKA_HUMAN  | chembl | Q13132 | Inhibitor of nuclear factor kappa-B kinase alpha subunit (I kappa-B kinase alpha) (IkbKA) (IKK-alpha) (IKK-A) (IkappaB kinase) (I-kappa-B kinase 1) (IKK1) (Conserved helix-loop-helix ubiquitous kinase) (Nuclear factor NFkappaB inhibitor kinase alpha) ... |
| IL2RA_HUMAN | chembl | Q5W007 | Interleukin-2 receptor alpha chain precursor (IL-2 receptor alpha subunit) (P55) (TAC antigen) (CD25 antigen)                                                                                                                                                  |
| IL2RA_MOUSE | chembl | Q61731 | Interleukin-2 receptor alpha chain precursor (IL-2 receptor alpha subunit) (P55) (TAC antigen) (CD25)                                                                                                                                                          |
| IL2_MOUSE   | chembl | Q791T3 | Interleukin-2 precursor (IL-2) (T-cell growth factor) (TCGF)                                                                                                                                                                                                   |

|             |        |        |                                                                                                                                                                       |
|-------------|--------|--------|-----------------------------------------------------------------------------------------------------------------------------------------------------------------------|
| IMDH1_MOUSE | chembl | P50096 | Inosine-5-monophosphate dehydrogenase 1 (IMP dehydrogenase 1) (IMPDH-I) (IMPD 1)                                                                                      |
| IMDH2_MOUSE | chembl | Q61734 | Inosine-5-monophosphate dehydrogenase 2 (IMP dehydrogenase 2) (IMPDH-II) (IMPD 2)                                                                                     |
| IMPA1_BOVIN | chembl | Q17QE4 | Inositol-1(or 4)-monophosphatase (IMPase) (IMP) (Inositol monophosphatase) (Lithium-sensitive myo-inositol monophosphatase A1)                                        |
| IMPA2_HUMAN | chembl | Q9UJT3 | Inositol-1(or 4)-monophosphatase 2 (IMPase 2) (IMP 2) (Inositol monophosphatase 2) (Myo-inositol monophosphatase A2)                                                  |
| INCE_HUMAN  | chembl | A8MQD2 | Inner centromere protein.                                                                                                                                             |
| INHA_MYCTU  | chembl | P46533 | Enoyl-[acyl-carrier-protein] reductase [NADH] (NADH-dependent enoyl-ACP reductase)                                                                                    |
| INSR_HUMAN  | chembl | P06213 | Insulin receptor precursor (IR) (CD220 antigen)                                                                                                                       |
| IRAK4_HUMAN | chembl | Q9Y589 | Interleukin-1 receptor-associated kinase-4 (IRAK-4) (NY-REN-64 antigen)                                                                                               |
| IRK11_HUMAN | chembl | Q2M1H7 | ATP-sensitive inward rectifier potassium channel 11 (Potassium channel, inwardly rectifying, subfamily J, member 11) (Inward rectifier K(+) channel Kir6.2) (IKATP)   |
| IRK8_HUMAN  | chembl | Q15842 | ATP-sensitive inward rectifier potassium channel 8 (Potassium channel, inwardly rectifying, subfamily J, member 8) (Inwardly rectifier K(+) channel Kir6.1) (uKATP-1) |
| ITAL_HUMAN  | chembl | Q45H73 | Integrin alpha-L precursor (Leukocyte adhesion glycoprotein LFA-1 alpha chain) (LFA-1A) (Leukocyte function associated molecule 1, alpha chain) (CD11a)               |
| ITB1_RAT    | chembl | P49134 | Integrin beta-1 precursor (Fibronectin receptor beta subunit) (CD29 antigen) (Integrin VLA-4 beta subunit)                                                            |
| ITB2_HUMAN  | chembl | Q9UD72 | Integrin beta-2 precursor (Cell surface adhesion glycoproteins LFA-1/CR3/p150,95 beta-subunit) (CD18) (Complement receptor C3 beta-subunit)                           |
| ITK_HUMAN   | chembl | Q08881 | Tyrosine-protein kinase ITK/TSK (T-cell-specific kinase) (Tyrosine-protein kinase Lck) (Kinase EMT)                                                                   |
| ITPR1_BOVIN | chembl | Q9TU34 | Inositol 1,4,5-trisphosphate receptor type 1 (Type 1 inositol 1,4,5-trisphosphate receptor) (Type 1 InsP3 receptor) (IP3 receptor isoform 1) (InsP3R1)                |
| ITPR1_HUMAN | chembl | Q99897 | Inositol 1,4,5-trisphosphate receptor type 1 (Type 1                                                                                                                  |

|             |        |        |                                                                                                                                                                 |
|-------------|--------|--------|-----------------------------------------------------------------------------------------------------------------------------------------------------------------|
| ITPR1_RAT   | chembl | P29994 | inositol 1,4,5-trisphosphate receptor) (Type 1 InsP3 receptor) (IP3 receptor isoform 1) (InsP3R1) (IP3R)                                                        |
| ITPR2_BOVIN | chembl | Q8WN96 | Inositol 1,4,5-trisphosphate receptor type 1 (Type 1 inositol 1,4,5-trisphosphate receptor) (Type 1 InsP3 receptor) (IP3 receptor isoform 1) (InsP3R1) (IP-3-R) |
| ITPR2_RAT   | chembl | Q99P56 | inositol 1,4,5-triphosphate receptor, type 2 [Bos taurus]                                                                                                       |
| ITPR3_BOVIN | chembl | Q8WN95 | Inositol 1,4,5-trisphosphate receptor type 2 (Type 2 inositol 1,4,5-trisphosphate receptor) (Type 2 InsP3 receptor) (IP3 receptor isoform 2) (InsP3R2)          |
| ITPR3_HUMAN | chembl | Q14573 | inositol 1,4,5-triphosphate receptor, type 3 [Bos taurus]                                                                                                       |
| ITPR3_RAT   | chembl | Q63269 | Inositol 1,4,5-trisphosphate receptor type 3 (Type 3 inositol 1,4,5-trisphosphate receptor) (Type 3 InsP3 receptor) (IP3 receptor isoform 3) (InsP3R3)          |
| JAK2_HUMAN  | chembl | O75297 | Inositol 1,4,5-trisphosphate receptor type 3 (Type 3 inositol 1,4,5-trisphosphate receptor) (Type 3 InsP3 receptor) (IP3 receptor isoform 3) (InsP3R3) (IP3R-3) |
| JAK3_HUMAN  | chembl | Q13260 | Tyrosine-protein kinase JAK2 (Janus kinase 2) (JAK-2)                                                                                                           |
| KAP2_BOVIN  | chembl | P00515 | Tyrosine-protein kinase JAK3 (Janus kinase 3) (JAK-3) (Leukocyte janus kinase) (L-JAK)                                                                          |
| KAP3_BOVIN  | chembl | P31322 | cAMP-dependent protein kinase type II-alpha regulatory subunit                                                                                                  |
| KAPCA_HUMAN | chembl | Q32P54 | cAMP-dependent protein kinase type II-beta regulatory subunit                                                                                                   |
| KAPCA_RAT   | chembl | P27791 | cAMP-dependent protein kinase, alpha-catalytic subunit (PKA C-alpha)                                                                                            |
| KAPCB_BOVIN | chembl | P24256 | cAMP-dependent protein kinase, alpha-catalytic subunit (PKA C-alpha)                                                                                            |
| KAPCB_HUMAN | chembl | Q7Z3M1 | cAMP-dependent protein kinase, beta-1 catalytic subunit (PKA C-beta-1)                                                                                          |
| KAPCG_HUMAN | chembl | O60850 | cAMP-dependent protein kinase, beta-catalytic subunit (PKA C-beta)                                                                                              |
| KC1A_HUMAN  | chembl | Q5U046 | cAMP-dependent protein kinase, gamma-catalytic subunit (PKA C-gamma)                                                                                            |
| KC1D_HUMAN  | chembl | Q96KZ6 | Casein kinase I, alpha isoform (CKI-alpha) (CK1)                                                                                                                |
|             |        |        | Casein kinase I, delta isoform (CKI-delta) (CKId)                                                                                                               |

|             |        |        |                                                                                                                                                                                                                                                              |
|-------------|--------|--------|--------------------------------------------------------------------------------------------------------------------------------------------------------------------------------------------------------------------------------------------------------------|
| KC1E_HUMAN  | chembl | P49674 | Casein kinase I, epsilon isoform (CKI-epsilon) (CKIε)                                                                                                                                                                                                        |
| KC1G1_HUMAN | chembl | Q9HCP0 | Casein kinase I, gamma 1 isoform (CKI-gamma 1)                                                                                                                                                                                                               |
| KC1G2_HUMAN | chembl | B5BU42 | Casein kinase I, gamma 2 isoform (CKI-gamma 2)                                                                                                                                                                                                               |
| KCC1A_HUMAN | chembl | Q14012 | Calcium/calmodulin-dependent protein kinase type 1 (CaM kinase I) (CaM-KI) (CaM kinase I alpha) (CaMKI-alpha)                                                                                                                                                |
| KCC1D_HUMAN | chembl | B0YIY0 | Calcium/calmodulin-dependent protein kinase type 1D (EC 2.7.11.17) (CaM kinase ID) (CaM kinase I delta) (CaMKI-delta) (CaM-KI delta) (CaMKI delta) (Camk1D) (CamKI-like protein kinase) (CKLiK).                                                             |
| KCC2A_HUMAN | chembl | Q9Y2H4 | Calcium/calmodulin-dependent protein kinase type II alpha chain (CaM-kinase II alpha chain) (CaM kinase II alpha subunit) (CaMK-II alpha subunit)                                                                                                            |
| KCC2A_MOUSE | chembl | Q61284 | Calcium/calmodulin-dependent protein kinase type II alpha chain (CaM-kinase II alpha chain) (CaM kinase II alpha subunit) (CaMK-II alpha subunit)                                                                                                            |
| KCC2A_RAT   | chembl | P11275 | Calcium/calmodulin-dependent protein kinase type II alpha chain (CaM-kinase II alpha chain) (CaM kinase II alpha subunit) (CaMK-II alpha subunit)                                                                                                            |
| KCC2B_HUMAN | chembl | Q9UGH9 | Calcium/calmodulin-dependent protein kinase type II beta chain (CaM-kinase II beta chain) (CaM kinase II beta subunit) (CaMK-II beta subunit)                                                                                                                |
| KCC2B_MOUSE | chembl | P28652 | Calcium/calmodulin-dependent protein kinase type II beta chain (CaM-kinase II beta chain) (CaM kinase II beta subunit) (CaMK-II beta subunit)                                                                                                                |
| KCC2D_HUMAN | chembl | Q52PK4 | Calcium/calmodulin-dependent protein kinase type II delta chain (CaM-kinase II delta chain) (CaM kinase II delta subunit) (CaMK-II delta subunit)                                                                                                            |
| KCC2G_MOUSE | chembl | Q8VED3 | Calcium/calmodulin-dependent protein kinase type II gamma chain (CaM-kinase II gamma chain) (CaM kinase II gamma subunit) (CaMK-II gamma subunit)                                                                                                            |
| KCC4_HUMAN  | chembl | Q16566 | Calcium/calmodulin-dependent protein kinase type IV (CAM kinase-GR) (CaMK IV)                                                                                                                                                                                |
| KCMA1_HUMAN | chembl | Q5JQ23 | Calcium-activated potassium channel alpha subunit 1 (Calcium-activated potassium channel, subfamily M, alpha subunit 1) (Maxi K channel) (MaxiK) (BK channel) (K(VCA)alpha) (BKCA alpha) (KCa1.1) (Slowpoke homolog) (Slo homolog) (Slo-alpha) (Slo1) (hSlo) |

|             |        |        |                                                                                                                                                                                                                                               |
|-------------|--------|--------|-----------------------------------------------------------------------------------------------------------------------------------------------------------------------------------------------------------------------------------------------|
| KCNA1_HUMAN | chembl | Q3MIQ9 | Potassium voltage-gated channel subfamily A member 1 (Voltage-gated potassium channel subunit Kv1.1) (HUKI) (HBK1)                                                                                                                            |
| KCNA2_HUMAN | chembl | P16389 | Potassium voltage-gated channel subfamily A member 2 (Voltage-gated potassium channel subunit Kv1.2) (HBK5) (NGK1) (HUKIV)                                                                                                                    |
| KCNA3_HUMAN | chembl | Q5VWN2 | Potassium voltage-gated channel subfamily A member 3 (Voltage-gated potassium channel subunit Kv1.3) (HPCN3) (HGK5) (HuKIII) (HLK3)                                                                                                           |
| KCNA5_HUMAN | chembl | Q4VAJ2 | Potassium voltage-gated channel subfamily A member 5 (Voltage-gated potassium channel subunit Kv1.5) (HK2) (HPCN1)                                                                                                                            |
| KCND3_HUMAN | chembl | O60576 | Potassium voltage-gated channel subfamily D member 3 (Voltage-gated potassium channel subunit Kv4.3)                                                                                                                                          |
| KCNE1_HUMAN | chembl | P15382 | Potassium voltage-gated channel subfamily E member 1 (IKs producing slow voltage-gated potassium channel beta subunit Mink) (Minimal potassium channel) (Delayed rectifier potassium channel subunit Isk)                                     |
| KCNH2_HUMAN | chembl | O75680 | Potassium voltage-gated channel subfamily H member 2 (Voltage-gated potassium channel subunit Kv11.1) (Ether-a-go-go related gene potassium channel 1) (H-ERG) (Erg1) (Ether-a-go-go related protein 1) (Eag related protein 1) (eag homolog) |
| KCNN1_HUMAN | chembl | Q6DJU4 | Small conductance calcium-activated potassium channel protein 1 (SK1)                                                                                                                                                                         |
| KCNN1_RAT   | chembl | P70606 | Small conductance calcium-activated potassium channel protein 1 (SK1)                                                                                                                                                                         |
| KCNN2_HUMAN | chembl | Q0VFZ4 | Small conductance calcium-activated potassium channel protein 2 (SK2)                                                                                                                                                                         |
| KCNN2_RAT   | chembl | P70604 | Small conductance calcium-activated potassium channel protein 2 (SK2)                                                                                                                                                                         |
| KCNN3_HUMAN | chembl | Q9UGI6 | Small conductance calcium-activated potassium channel protein 3 (SK3) (SKCa3)                                                                                                                                                                 |
| KCNN3_RAT   | chembl | P70605 | Small conductance calcium-activated potassium channel protein 3 (SK3)                                                                                                                                                                         |
| KCNN4_HUMAN | chembl | Q53XR4 | Intermediate conductance calcium-activated potassium channel protein 4 (SK4) (KCa4) (IK1)                                                                                                                                                     |

|             |        |        |                                                                                                                                                                                               |
|-------------|--------|--------|-----------------------------------------------------------------------------------------------------------------------------------------------------------------------------------------------|
| KCNN4_RAT   | chembl | Q9R198 | (IKCa1) (Putative Gardos channel)<br>potassium intermediate/small conductance calcium-activated channel, subfamily N, member 4 [Rattus norvegicus]                                            |
| KCNQ1_CAVPO | chembl | Q9QYG3 | Potassium voltage-gated channel subfamily KQT member 1 (Voltage-gated potassium channel subunit Kv7.1) (IKs producing slow voltage-gated potassium channel alpha subunit KvLQT1) (KQT-like 1) |
| KCNQ1_HUMAN | chembl | O94787 | Potassium voltage-gated channel subfamily KQT member 1 (Voltage-gated potassium channel subunit Kv7.1) (IKs producing slow voltage-gated potassium channel alpha subunit KvLQT1) (KQT-like 1) |
| KGP1A_BOVIN | chembl | P00516 | cGMP-dependent protein kinase 1, alpha isozyme (CGK 1 alpha) (CGKI-alpha)                                                                                                                     |
| KGP1A_HUMAN | chembl | Q13976 | cGMP-dependent protein kinase 1, alpha isozyme (CGK 1 alpha) (cGKI-alpha)                                                                                                                     |
| KGP1B_BOVIN | chembl | P21136 | cGMP-dependent protein kinase 1, beta isozyme (CGK 1 beta) (cGKI-beta)                                                                                                                        |
| KGP1B_HUMAN | chembl | Q5JSJ6 | cGMP-dependent protein kinase 1, beta isozyme (CGK 1 beta) (cGKI-beta)                                                                                                                        |
| KGP2_HUMAN  | chembl | Q13237 | cGMP-dependent protein kinase 2 (CGK 2) (cGKII) (Type II cGMP-dependent protein kinase)                                                                                                       |
| KIF11_HUMAN | chembl | Q5VWX0 | Kinesin-like protein KIF11 (Kinesin-related motor protein Eg5) (Kinesin-like spindle protein HKSP) (Thyroid receptor interacting protein 5) (TRIP5) (Kinesin-like protein 1)                  |
| KITH_HHV1S  | chembl | P06479 | Thymidine kinase                                                                                                                                                                              |
| KITH_HUMAN  | chembl | Q9UMG9 | Thymidine kinase, cytosolic                                                                                                                                                                   |
| KITH_VZVD   | chembl | P14343 | Thymidine kinase                                                                                                                                                                              |
| KIT_HUMAN   | chembl | Q9UM99 | Mast/stem cell growth factor receptor precursor (SCFR) (Proto-oncogene tyrosine-protein kinase Kit) (c-kit) (CD117 antigen)                                                                   |
| KKCC2_HUMAN | chembl | Q8WY03 | Calcium/calmodulin-dependent protein kinase kinase 2 (EC 2.7.11.17) (Calcium/calmodulin-dependent protein kinase kinase beta) (CaM-kinase kinase beta) (CaM-KK beta) (CaMKK beta).            |
| KLK10_HUMAN | chembl | A6NC12 | Kallikrein 10 precursor (Protease serine-like 1) (Normal epithelial cell-specific 1)                                                                                                          |

|             |        |        |                                                                                                                                                        |
|-------------|--------|--------|--------------------------------------------------------------------------------------------------------------------------------------------------------|
| KLK11_HUMAN | chembl | Q9UBX7 | Kallikrein 11 precursor (Hippostasin) (Trypsin-like protease) (UNQ649/PRO1279)                                                                         |
| KLK12_HUMAN | chembl | Q9UKR1 | Kallikrein 12 precursor (Kallikrein-like protein 5) (KLK-L5) (UNQ669/PRO1303)                                                                          |
| KLK13_HUMAN | chembl | Q9UKR3 | Kallikrein 13 precursor (Kallikrein-like protein 4) (KLK-L4)                                                                                           |
| KLK14_HUMAN | chembl | Q9P0G3 | Kallikrein 14 precursor (Kallikrein-like protein 6) (KLK-L6)                                                                                           |
| KLK15_HUMAN | chembl | Q9HBG9 | Kallikrein 15 precursor (ACO protease)                                                                                                                 |
| KLK1_HUMAN  | chembl | Q9NQU4 | Kallikrein 1 precursor (Tissue kallikrein) (Kidney/pancreas/salivary gland kallikrein)                                                                 |
| KLK2_HUMAN  | chembl | P20151 | Kallikrein 2 precursor (Tissue kallikrein 2) (Glandular kallikrein-1) (hGK-1)                                                                          |
| KLK4_HUMAN  | chembl | Q4VB16 | Kallikrein 4 precursor (Prostase) (Kallikrein-like protein 1) (KLK-L1) (Enamel matrix serine proteinase 1)                                             |
| KLK5_HUMAN  | chembl | Q9HBG8 | Kallikrein 5 precursor (Stratum corneum tryptic enzyme) (Kallikrein-like protein 2) (KLK-L2) (UNQ570/PRO1132)                                          |
| KLK6_HUMAN  | chembl | Q6H301 | Kallikrein 6 precursor (Protease M) (Neurosin) (Zyme) (SP59)                                                                                           |
| KLK7_HUMAN  | chembl | Q8N5N9 | Kallikrein 7 precursor (Stratum corneum chymotryptic enzyme) (hSCCE)                                                                                   |
| KLK8_HUMAN  | chembl | Q8IW69 | Neuropsin precursor (NP) (Kallikrein 8) (Ovasin) (Serine protease TADG-14) (Tumor-associated differentially expressed gene-14 protein) (UNQ283/PRO322) |
| KLK9_HUMAN  | chembl | Q9UKQ9 | Kallikrein 9 precursor (Kallikrein-like protein 3) (KLK-L3)                                                                                            |
| KLKB1_HUMAN | chembl | B2R8H9 | Plasma kallikrein precursor (Plasma prekallikrein) (Kininogenin) (Fletcher factor)                                                                     |
| KMO_RAT     | chembl | O88867 | kynurenine 3-monooxygenase (kynurenine 3-hydroxylase) [Rattus norvegicus]                                                                              |
| KPCA_BOVIN  | chembl | P04409 | Protein kinase C, alpha type (PKC-alpha) (PKC-A)                                                                                                       |
| KPCA_MOUSE  | chembl | P20444 | Protein kinase C, alpha type (PKC-alpha) (PKC-A)                                                                                                       |
| KPCA_RAT    | chembl | P05696 | Protein kinase C, alpha type (PKC-alpha) (PKC-A)                                                                                                       |
| KPCB_MOUSE  | chembl | A0JNZ5 | Protein kinase C, beta type (PKC-beta) (PKC-B)                                                                                                         |
| KPCB_RAT    | chembl | P68403 | Protein kinase C, beta type (PKC-beta) (PKC-B)                                                                                                         |
| KPCD1_HUMAN | chembl | B2RAF6 | Protein kinase C, mu type (nPKC-mu) (Protein kinase D)                                                                                                 |



|             |        |        |                                                                                                                                                                                                                                                           |
|-------------|--------|--------|-----------------------------------------------------------------------------------------------------------------------------------------------------------------------------------------------------------------------------------------------------------|
| KPCD_MOUSE  | chembl | Q91V85 | Protein kinase C, delta type (nPKC-delta)                                                                                                                                                                                                                 |
| KPCD_RAT    | chembl | P09215 | Protein kinase C, delta type (nPKC-delta)                                                                                                                                                                                                                 |
| KPCE_RAT    | chembl | P09216 | Protein kinase C, epsilon type (nPKC-epsilon)                                                                                                                                                                                                             |
| KPCG_MOUSE  | chembl | P63318 | Protein kinase C, gamma type (PKC-gamma)                                                                                                                                                                                                                  |
| KPCG_RAT    | chembl | P63319 | Protein kinase C, gamma type (PKC-gamma)                                                                                                                                                                                                                  |
| KPCI_HUMAN  | chembl | Q8WW06 | Protein kinase C, iota type (nPKC-iota) (Atypical protein kinase C-lambda/iota) (aPKC-lambda/iota) (PRKC-lambda/iota)                                                                                                                                     |
| KPCL_MOUSE  | chembl | P23298 | Protein kinase C, eta type (nPKC-eta) (PKC-L)                                                                                                                                                                                                             |
| KPCL_RAT    | chembl | Q64617 | Protein kinase C, eta type (nPKC-eta) (PKC-L)                                                                                                                                                                                                             |
| KPCZ_RAT    | chembl | P09217 | Protein kinase C, zeta type (nPKC-zeta)                                                                                                                                                                                                                   |
| KS6A1_HUMAN | chembl | Q15418 | Ribosomal protein S6 kinase alpha 1 (S6K-alpha 1) (90 kDa ribosomal protein S6 kinase 1) (p90-RSK 1) (Ribosomal S6 kinase 1) (RSK-1) (pp90RSK1)                                                                                                           |
| KS6A2_HUMAN | chembl | Q96J38 | Ribosomal protein S6 kinase alpha 2 (S6K-alpha 2) (90 kDa ribosomal protein S6 kinase 2) (p90-RSK 2) (Ribosomal S6 kinase 3) (RSK-3) (pp90RSK3)                                                                                                           |
| KS6A3_HUMAN | chembl | Q4VAP3 | Ribosomal protein S6 kinase alpha 3 (S6K-alpha 3) (90 kDa ribosomal protein S6 kinase 3) (p90-RSK 3) (Ribosomal S6 kinase 2) (RSK-2) (pp90RSK2)                                                                                                           |
| KS6A4_HUMAN | chembl | O75676 | (Insulin-stimulated protein kinase 1) (ISPK-1)                                                                                                                                                                                                            |
| KS6A6_HUMAN | chembl | Q9UK32 | Ribosomal protein S6 kinase alpha 4 (Nuclear mitogen-and stress-activated protein kinase-2) (90 kDa ribosomal protein S6 kinase 4) (Ribosomal protein kinase B) (RSKB)                                                                                    |
| KS6B2_HUMAN | chembl | Q9UBS0 | Ribosomal protein S6 kinase alpha 6 (S6K-alpha 6) (90 kDa ribosomal protein S6 kinase 6) (p90-RSK 6) (Ribosomal S6 kinase 4) (RSK-4) (pp90RSK4)                                                                                                           |
| KTHY_MYCTU  | chembl | Q7D5U8 | Ribosomal protein S6 kinase 2 (S6K2) (70 kDa ribosomal protein S6 kinase 2) (p70-S6KB) (p70 ribosomal S6 kinase beta) (p70 S6Kbeta) (p70 S6 kinase beta) (S6K-beta) (p70-beta) (S6 kinase-related kinase) (SRK) (Serine/threonine-protein kinase 14 beta) |
| LACTB_HUMAN | chembl | P83111 | Thymidylate kinase (Thymidine monophosphate kinase) (dTMP kinase) (TMPK)                                                                                                                                                                                  |
| LCK_HUMAN   | chembl | Q5TDH8 | Serine beta-lactamase-like protein LACTB (UNQ843/PRO1781)                                                                                                                                                                                                 |
|             |        |        | Proto-oncogene tyrosine-protein kinase LCK (P56-LCK) (LSK) (T cell-specific protein-tyrosine kinase)                                                                                                                                                      |

|             |        |        |                                                                                                                                                                                                                        |
|-------------|--------|--------|------------------------------------------------------------------------------------------------------------------------------------------------------------------------------------------------------------------------|
| LCK_MOUSE   | chembl | Q62320 | Proto-oncogene tyrosine-protein kinase LCK (P56-LCK) (LSK)                                                                                                                                                             |
| LGUL_HUMAN  | chembl | Q5TZW3 | Lactoylglutathione lyase (Methylglyoxalase) (Aldoketomutase) (Glyoxalase I) (Glx I) (Ketone-aldehyde mutase) (S-D-lactoylglutathione methylglyoxal lyase)                                                              |
| LKHA4_HUMAN | chembl | Q6IAT6 | Leukotriene A-4 hydrolase (LTA-4 hydrolase) (Leukotriene A(4) hydrolase)                                                                                                                                               |
| LKHA4_RAT   | chembl | P30349 | Leukotriene A-4 hydrolase (LTA-4 hydrolase) (Leukotriene A(4) hydrolase)                                                                                                                                               |
| LOX12_HUMAN | chembl | Q6ISF8 | Arachidonate 12-lipoxygenase, 12S-type (12-LOX) (Platelet-type lipoxygenase 12)                                                                                                                                        |
| LOX12_PIG   | chembl | P16469 | Arachidonate 12-lipoxygenase, 12S-type (12-LOX)                                                                                                                                                                        |
| LOX15_HUMAN | chembl | A8K2P4 | Arachidonate 15-lipoxygenase (Arachidonate omega-6 lipoxygenase) (15-LOX)                                                                                                                                              |
| LOX15_RABIT | chembl | P12530 | Arachidonate 15-lipoxygenase (Omega-6 lipoxygenase) (Erythroid cell-specific 15-lipoxygenase) (15-LOX)                                                                                                                 |
| LOX5_MOUSE  | chembl | P48999 | Arachidonate 5-lipoxygenase (5-lipoxygenase) (5-LO)                                                                                                                                                                    |
| LOX5_RAT    | chembl | P12527 | Arachidonate 5-lipoxygenase (5-lipoxygenase) (5-LO)                                                                                                                                                                    |
| LPXC_ECOLI  | chembl | P0A725 | UDP-3-O-[3-hydroxymyristoyl] N-acetylglucosamine deacetylase (UDP-3-O-acyl-GlcNAc deacetylase) (envA protein)                                                                                                          |
| LT4R2_HUMAN | chembl | Q9NPC1 | Leukotriene B4 receptor 2 (LTB4-R2) (Seven transmembrane receptor BLTR2) (Leukotriene B4 receptor BLT2) (LTB4 receptor JULF2)                                                                                          |
| LX12L_RAT   | chembl | Q02759 | Arachidonate 12-lipoxygenase (12-LOX)                                                                                                                                                                                  |
| LX15B_HUMAN | chembl | Q8IYQ2 | Arachidonate 15-lipoxygenase, type II (15-LOX-2) (15-lipoxygenase 2)                                                                                                                                                   |
| LYAG_HUMAN  | chembl | Q16302 | Lysosomal alpha-glucosidase precursor (Acid maltase)                                                                                                                                                                   |
| LYAG_RAT    | chembl | Q6P7A9 | glucosidase, alpha, acid (Pompe disease, glycogen storage disease type II) [Rattus norvegicus]                                                                                                                         |
| LYAM1_HUMAN | chembl | P14151 | L-selectin precursor (Lymph node homing receptor) (Leukocyte adhesion molecule-1) (LAM-1) (Leukocyte surface antigen Leu-8) (TQ1) (gp90-MEL) (Leukocyte-endothelial cell adhesion molecule 1) (LECAM1) (CD62L antigen) |

|             |        |        |                                                                                                                                                                                  |
|-------------|--------|--------|----------------------------------------------------------------------------------------------------------------------------------------------------------------------------------|
| LYAM2_HUMAN | chembl | A2RRD6 | E-selectin precursor (Endothelial leukocyte adhesion molecule 1) (ELAM-1) (Leukocyte-endothelial cell adhesion molecule 2) (LECAM2) (CD62E antigen)                              |
| LYAM3_HUMAN | chembl | Q8IVD1 | P-selectin precursor (Granule membrane protein 140) (GMP-140) (PADGEM) (CD62P antigen) (Leukocyte-endothelial cell adhesion molecule 3) (LECAM3)                                 |
| LYN_HUMAN   | chembl | A0AVQ5 | Tyrosine-protein kinase Lyn                                                                                                                                                      |
| M3K11_HUMAN | chembl | Q59F06 | mitogen-activated protein kinase kinase kinase 11 [Homo sapiens]                                                                                                                 |
| M3K4_HUMAN  | chembl | Q92612 | Mitogen-activated protein kinase kinase kinase 4 (EC 2.7.11.25) (MAPK/ERK kinase kinase 4) (MEK kinase 4) (MEKK 4) (MAP three kinase 1).                                         |
| M3K8_HUMAN  | chembl | P41279 | Mitogen-activated protein kinase kinase kinase 8 (EC 2.7.11.25) (COT proto-oncogene serine/threonine-protein kinase) (C-COT) (Cancer Osaka thyroid oncogene).                    |
| M4K5_HUMAN  | chembl | Q9Y4K4 | Mitogen-activated protein kinase kinase kinase kinase 5 (EC 2.7.11.1) (MAPK/ERK kinase kinase kinase 5) (MEK kinase kinase 5) (MEKKK 5) (Kinase homologous to SPS1/STE20) (KHS). |
| MADCA_HUMAN | chembl | O60222 | Mucosal addressin cell adhesion molecule-1 precursor (MAdCAM-1) (hMAdCAM-1)                                                                                                      |
| MAL12_YEAST | chembl | P53341 | Alpha-glucosidase MAL12 (Maltase)                                                                                                                                                |
| MAL32_YEAST | chembl | P38158 | Alpha-glucosidase MAL32 (Maltase)                                                                                                                                                |
| MAOX_HUMAN  | chembl | Q9H1W3 | NADP-dependent malic enzyme (EC 1.1.1.40) (NADP-ME) (Malic enzyme 1).                                                                                                            |
| MARK2_HUMAN | chembl | Q96RG0 | MAP/microtubule affinity-regulating kinase 2 isoform a [Homo sapiens]                                                                                                            |
| MBLC2_HUMAN | chembl | Q68D91 | similar to metallo-beta-lactamase superfamily protein [Homo sapiens]                                                                                                             |
| MC3R_MOUSE  | chembl | P33033 | Melanocortin-3 receptor (MC3-R)                                                                                                                                                  |
| MC4R_MOUSE  | chembl | Q9EQM7 | Melanocortin-4 receptor (MC4-R)                                                                                                                                                  |
| MC4R_RAT    | chembl | P70596 | Melanocortin-4 receptor (MC4-R)                                                                                                                                                  |
| MCHR1_HUMAN | chembl | Q9BV08 | Melanin-concentrating hormone receptor 1 (MCH receptor 1) (MCHR-1) (MCH-R1) (MCH1R) (MCH-1R) (MCHR) (G protein coupled receptor 24) (Somatostatin receptor-like protein) (SLC-1) |
| MCHR1_MOUSE | chembl | Q8JZL2 | Melanin-concentrating hormone receptor 1 (MCH                                                                                                                                    |

|            |        |        |                                                                                                                                                                                                                                              |
|------------|--------|--------|----------------------------------------------------------------------------------------------------------------------------------------------------------------------------------------------------------------------------------------------|
| MCL1_HUMAN | chembl | Q9UHR9 | receptor 1) (MCHR-1) (MCH-R1) (MCH1R) (MCH-1R) (MCHR) (G-protein coupled receptor 24) (Somatostatin receptor-like protein) (SLC-1) Induced myeloid leukemia cell differentiation protein Mcl-1 (Bcl-2- related protein EAT/mcl1) (mcl1/EAT). |
| MCR_RAT    | chembl | P22199 | Mineralocorticoid receptor (MR)                                                                                                                                                                                                              |
| MDM2_HUMAN | chembl | A8K2S6 | Ubiquitin-protein ligase E3 Mdm2 (p53-binding protein Mdm2) (Oncoprotein Mdm2) (Double minute 2 protein) (Hdm2)                                                                                                                              |
| MDR2_MOUSE | chembl | P21440 | Multidrug resistance protein 2 (P-glycoprotein 2)                                                                                                                                                                                            |
| METK1_RAT  | chembl | Q5FVU2 | S-adenosylmethionine synthetase alpha and beta forms (Methionine adenosyltransferase) (AdoMet synthetase) (MAT-I/III)                                                                                                                        |
| METK2_RAT  | chembl | P18298 | S-adenosylmethionine synthetase gamma form (Methionine adenosyltransferase) (AdoMet synthetase) (MAT-II)                                                                                                                                     |
| MET_HUMAN  | chembl | P08581 | Hepatocyte growth factor receptor precursor (Met proto-oncogene tyrosine kinase) (c-met) (HGF receptor) (HGF-SF receptor)                                                                                                                    |
| MGA_HUMAN  | chembl | Q86UM5 | Maltase-glucoamylase, intestinal (Maltase) (Alpha-glucosidase) (Glucoamylase) (Glucan 1,4-alpha-glucosidase)                                                                                                                                 |
| MGLL_RAT   | chembl | Q8R431 | Monoglyceride lipase (EC 3.1.1.23) (MGL).                                                                                                                                                                                                    |
| MK03_HUMAN | chembl | P27361 | Mitogen-activated protein kinase 3 (Extracellular signal-regulated kinase 1) (ERK-1) (Insulin-stimulated MAP2 kinase) (MAP kinase 1) (MAPK 1) (p44-ERK1) (ERT2) (p44-MAPK) (Microtubule-associated protein-2 kinase)                         |
| MK10_RAT   | chembl | P49187 | Mitogen-activated protein kinase 10 (Stress-activated protein kinase JNK3) (c-Jun N-terminal kinase 3) (SAPK-beta) (p54-beta)                                                                                                                |
| MK11_HUMAN | chembl | O00284 | Mitogen-activated protein kinase 11 (Mitogen-activated protein kinase p38 beta) (MAP kinase p38 beta) (p38b) (p38-2) (Stress-activated protein kinase-2)                                                                                     |
| MK11_MOUSE | chembl | Q9WUI1 | Mitogen-activated protein kinase 11 (Mitogen-activated protein kinase p38 beta) (MAP kinase p38 beta) (p38B)                                                                                                                                 |
| MK12_HUMAN | chembl | Q14260 | Mitogen-activated protein kinase 12 (Extracellular signal-regulated kinase 6) (ERK-6) (ERK5) (Stress-                                                                                                                                        |

|             |        |        |                                                                                                                                                                                                                                                                                                  |
|-------------|--------|--------|--------------------------------------------------------------------------------------------------------------------------------------------------------------------------------------------------------------------------------------------------------------------------------------------------|
| MK12_MOUSE  | chembl | Q9D0M4 | activated protein kinase-3) (Mitogen-activated protein kinase p38 gamma) (MAP kinase p38 gamma)<br>Mitogen-activated protein kinase 12 (Extracellular signal-regulated kinase 6) (ERK-6) (Stress-activated protein kinase-3) (Mitogen-activated protein kinase p38 gamma) (MAP kinase p38 gamma) |
| MK13_HUMAN  | chembl | O15264 | Mitogen-activated protein kinase 13 (Stress-activated protein kinase-4) (Mitogen-activated protein kinase p38 delta) (MAP kinase p38 delta)                                                                                                                                                      |
| MK13_MOUSE  | chembl | Q99M57 | Mitogen-activated protein kinase 13 (Stress-activated protein kinase-4) (Mitogen-activated protein kinase p38 delta) (MAP kinase p38 delta)                                                                                                                                                      |
| MK14_MOUSE  | chembl | B2KF37 | Mitogen-activated protein kinase 14 (Mitogen-activated protein kinase p38alpha) (MAP kinase p38alpha) (CRK1)                                                                                                                                                                                     |
| MK14_RAT    | chembl | P70618 | Mitogen-activated protein kinase 14 (Mitogen-activated protein kinase p38alpha) (MAP kinase p38alpha)                                                                                                                                                                                            |
| MKNK2_HUMAN | chembl | Q9Y2N6 | MAP kinase-interacting serine/threonine-protein kinase 2 (EC 2.7.11.1) (MAP kinase signal-integrating kinase 2) (Mnk2).                                                                                                                                                                          |
| MLTK_HUMAN  | chembl | Q9HCC5 | sterile-alpha motif and leucine zipper containing kinase AZK [Homo sapiens]                                                                                                                                                                                                                      |
| MMP10_HUMAN | chembl | Q53HH9 | Stromelysin-2 precursor (Matrix metalloproteinase-10) (MMP-10) (Transin-2) (SL-2)                                                                                                                                                                                                                |
| MMP11_HUMAN | chembl | Q6PEZ6 | Stromelysin-3 precursor (Matrix metalloproteinase-11) (MMP-11) (ST3) (SL-3)                                                                                                                                                                                                                      |
| MMP12_MOUSE | chembl | Q8BJB6 | Macrophage metalloelastase precursor (MME) (Matrix metalloproteinase-12) (MMP-12)                                                                                                                                                                                                                |
| MMP13_BOVIN | chembl | O77656 | Collagenase 3 precursor (Matrix metalloproteinase-13) (MMP-13)                                                                                                                                                                                                                                   |
| MMP13_HUMAN | chembl | P45452 | Collagenase 3 precursor (Matrix metalloproteinase-13) (MMP-13)                                                                                                                                                                                                                                   |
| MMP13_RAT   | chembl | P23097 | Collagenase 3 precursor (Matrix metalloproteinase-13) (MMP-13) (UMRCASE)                                                                                                                                                                                                                         |
| MMP17_HUMAN | chembl | Q9ULZ9 | Matrix metalloproteinase-17 precursor (MMP-17) (Membrane-type matrix metalloproteinase 4) (MT-MMP 4) (Membrane-type-4 matrix                                                                                                                                                                     |

|             |        |        |                                                                                                                                                |
|-------------|--------|--------|------------------------------------------------------------------------------------------------------------------------------------------------|
| MMP8_RAT    | chembl | O88766 | metalloproteinase) (MT4-MMP)<br>Neutrophil collagenase precursor (Matrix metalloproteinase-8) (MMP-8)                                          |
| MMP9_RAT    | chembl | P50282 | Matrix metalloproteinase-9 precursor (MMP-9) (92 kDa type IV collagenase) (92 kDa gelatinase) (Gelatinase B) (GELB)                            |
| MOT1_HUMAN  | chembl | Q9NSJ9 | Monocarboxylate transporter 1 (MCT 1) (Solute carrier family 16 member 1).                                                                     |
| MP2K1_HUMAN | chembl | Q02750 | Dual specificity mitogen-activated protein kinase kinase 1 (MAP kinase kinase 1) (MAPKK 1) (ERK activator kinase 1) (MAPK/ERK kinase 1) (MEK1) |
| MP2K2_HUMAN | chembl | P36507 | Dual specificity mitogen-activated protein kinase kinase 2 (MAP kinase kinase 2) (MAPKK 2) (ERK activator kinase 2) (MAPK/ERK kinase 2) (MEK2) |
| MPIP2_HUMAN | chembl | Q6RSS1 | M-phase inducer phosphatase 2 (Dual specificity phosphatase Cdc25B)                                                                            |
| MPIP2_MOUSE | chembl | P30306 | M-phase inducer phosphatase 2 (Dual specificity phosphatase Cdc25B)                                                                            |
| MPIP3_HUMAN | chembl | Q9H2F1 | M-phase inducer phosphatase 3 (Dual specificity phosphatase Cdc25C)                                                                            |
| MRAY_STAAR  | chembl | Q6GHQ3 | Phospho-N-acetylmuramoyl-pentapeptide-transferase (UDP-MurNAc-pentapeptide phosphotransferase)                                                 |
| MRAY_STRP3  | chembl | Q8K6C7 | Phospho-N-acetylmuramoyl-pentapeptide-transferase (UDP-MurNAc-pentapeptide phosphotransferase)                                                 |
| MSHR_MOUSE  | chembl | Q01727 | Melanocyte stimulating hormone receptor (MSH-R) (Melanotropin receptor) (Melanocortin-1 receptor) (MC1-R)                                      |
| MTAP_HUMAN  | chembl | Q5T3P3 | S-methyl-5-thioadenosine phosphorylase (5-methylthioadenosine phosphorylase) (MTA phosphorylase) (MTAPase)                                     |
| MTLR_HUMAN  | chembl | O43193 | Motilin receptor (G protein-coupled receptor 38)                                                                                               |
| MTP_BOVIN   | chembl | P55156 | Microsomal triglyceride transfer protein large subunit precursor                                                                               |
| MTR1A_CHICK | chembl | P49285 | Melatonin receptor type 1A (MEL-1A-R) (CKA)                                                                                                    |
| MTR1A_HUMAN | chembl | B0M0L2 | Melatonin receptor type 1A (Mel-1A-R) (Mel1a melatonin receptor)                                                                               |
| MTR1B_CHICK | chembl | P51050 | Melatonin receptor type 1B (MEL-1B-R)                                                                                                          |
| MTR1C_CHICK | chembl | P49288 | Melatonin receptor type 1C (MEL-1C-R) (CKB)                                                                                                    |

|             |        |        |                                                                                                                                              |
|-------------|--------|--------|----------------------------------------------------------------------------------------------------------------------------------------------|
| MURB_ECOLI  | chembl | Q2M8R3 | UDP-N-acetylenolpyruvoylglucosamine reductase (UDP-N-acetylmuramate dehydrogenase)                                                           |
| MURB_STAAU  | chembl | P61431 | UDP-N-acetylenolpyruvoylglucosamine reductase (UDP-N-acetylmuramate dehydrogenase)                                                           |
| MYLK2_HUMAN | chembl | Q569L1 | Myosin light chain kinase 2, skeletal/cardiac muscle (MLCK2)                                                                                 |
| MYLK_HUMAN  | chembl | Q15746 | Myosin light chain kinase, smooth muscle and non-muscle isozymes (MLCK) [Contains: (Telokin) (Kinase related protein) (KRP) ]                |
| NALD2_HUMAN | chembl | Q9Y3Q0 | N-acetylated-alpha-linked acidic dipeptidase II (NAALADase II)                                                                               |
| NDUA4_HUMAN | chembl | Q6FHN5 | NADH-ubiquinone oxidoreductase MLRQ subunit (EC 1.6.99.3) (Complex I-MLRQ) (CI-MLRQ)                                                         |
| NDUA6_HUMAN | chembl | P56556 | NADH-ubiquinone oxidoreductase B14 subunit (EC 1.6.99.3) (Complex I-B14) (CI-B14)                                                            |
| NDUA8_HUMAN | chembl | Q9Y6N0 | NADH-ubiquinone oxidoreductase 19 kDa subunit (EC 1.6.99.3) (Complex I-19KD) (CI-19KD)                                                       |
| NDUAA_HUMAN | chembl | O95299 | (Complex I-PGIV) (CI-PGIV)                                                                                                                   |
| NDUAB_HUMAN | chembl | Q86Y39 | NADH-ubiquinone oxidoreductase 42 kDa subunit, mitochondrial precursor (EC 1.6.99.3) (Complex I-42KD) (CI-42KD)                              |
| NDUB5_HUMAN | chembl | O43674 | NADH-ubiquinone oxidoreductase subunit B14.7 (EC 1.6.99.3) (Complex I-B14.7) (CI-B14.7)                                                      |
| NDUB6_HUMAN | chembl | Q61B84 | NADH-ubiquinone oxidoreductase SGDHD subunit, mitochondrial precursor (EC 1.6.99.3) (Complex I-SGDH) (CI-SGDH)                               |
| NDUB7_HUMAN | chembl | P17568 | NADH-ubiquinone oxidoreductase B17 subunit (EC 1.6.99.3) (Complex I-B17) (CI-B17)                                                            |
| NDUS2_HUMAN | chembl | O75306 | NADH-ubiquinone oxidoreductase B18 subunit (EC 1.6.99.3) (Complex I-B18) (CI-B18) (Cell adhesion protein SQM1)                               |
| NDUS8_HUMAN | chembl | O00217 | NADH-ubiquinone oxidoreductase 49 kDa subunit, mitochondrial precursor (EC 1.6.99.3) (Complex I-49KD) (CI-49KD)                              |
| NEMO_HUMAN  | chembl | Q9Y6K9 | NADH-ubiquinone oxidoreductase 23 kDa subunit, mitochondrial precursor (EC 1.6.99.3) (Complex I-23KD) (CI-23KD) (TYKY subunit)               |
|             |        |        | NF-kappa-B essential modulator (NEMO) (NF-kappa-B essential modifier) (Inhibitor of nuclear factor kappa-B kinase gamma subunit) (Ikb kinase |

|             |        |        |                                                                                                                                                                                                                |
|-------------|--------|--------|----------------------------------------------------------------------------------------------------------------------------------------------------------------------------------------------------------------|
| NEP_MOUSE   | chembl | Q8K251 | gamma subunit) (I-kappa-B kinase gamma) (IKK-gamma) (IKKG) (Ikb kinase-associated protein 1) (IKKAP1) (FIP-3)<br>Nepriylsin (Neutral endopeptidase) (NEP) (Enkephalinase) (Neutral endopeptidase 24.11) (CD10) |
| NEP_RABIT   | chembl | P08049 | Nepriylsin (Neutral endopeptidase) (NEP) (Enkephalinase) (Neutral endopeptidase 24.11)                                                                                                                         |
| NEP_RAT     | chembl | P07861 | Nepriylsin (Neutral endopeptidase) (NEP) (Enkephalinase)                                                                                                                                                       |
| NEUR1_HUMAN | chembl | Q99519 | Sialidase 1 precursor (Lysosomal sialidase) (N-acetyl-alpha-neuraminidase 1) (Acetylneuraminyl hydrolase) (G9 sialidase)                                                                                       |
| NEUR2_HUMAN | chembl | Q3KNW4 | Sialidase 2 (Cytosolic sialidase) (N-acetyl-alpha-neuraminidase 2)                                                                                                                                             |
| NEUR4_HUMAN | chembl | Q96D64 | Sialidase 4 (N-acetyl-alpha-neuraminidase 4) (LP5125)                                                                                                                                                          |
| NFKB2_HUMAN | chembl | Q04860 | Nuclear factor NF-kappa-B p100/p49 subunits (DNA-binding factor KBF2) (H2TF1) (Lymphocyte translocation chromosome 10) (Oncogene Lyt-10) (Lyt10) [Contains: (Nuclear factor NF-kappa-B p52 subunit) ]          |
| NIAR1_HUMAN | chembl | A0PJL5 | Nicotinic acid receptor 1 (G-protein coupled receptor 109A) (G-protein coupled receptor HM74A).                                                                                                                |
| NIAR1_RAT   | chembl | Q80Z39 | interferon-gamma inducible gene, Puma-g [Rattus norvegicus]                                                                                                                                                    |
| NICA_HUMAN  | chembl | Q86VV5 | Nicastrin precursor (UNQ1874/PRO4317)                                                                                                                                                                          |
| NISCH_HUMAN | chembl | Q6PGP3 | nischarin [Homo sapiens]                                                                                                                                                                                       |
| NK1R_CAVPO  | chembl | P30547 | Substance-P receptor (SPR) (NK-1 receptor) (NK-1R) (Tachykinin receptor 1)                                                                                                                                     |
| NK1R_RAT    | chembl | P14600 | Substance-P receptor (SPR) (NK-1 receptor) (NK-1R) (Tachykinin receptor 1)                                                                                                                                     |
| NK2R_CAVPO  | chembl | Q64077 | Substance-K receptor (SKR) (Neurokinin A receptor) (NK-2 receptor) (NK-2R) (Tachykinin receptor 2)                                                                                                             |
| NK2R_MOUSE  | chembl | P30549 | Substance-K receptor (SKR) (Neurokinin A receptor) (NK-2 receptor) (NK-2R) (Tachykinin receptor 2)                                                                                                             |
| NK2R_RAT    | chembl | P16610 | Substance-K receptor (SKR) (Neurokinin A                                                                                                                                                                       |



|             |        |        |                                                                                                                                                                          |
|-------------|--------|--------|--------------------------------------------------------------------------------------------------------------------------------------------------------------------------|
| NK3R_HUMAN  | chembl | P29371 | receptor) (NK-2 receptor) (NK-2R) (Tachykinin receptor 2)<br>Neuromedin K receptor (NKR) (Neurokinin B receptor) (NK-3 receptor) (NK-3R) (Tachykinin receptor 3)         |
| NMBR_HUMAN  | chembl | P28336 | Neuromedin-B receptor (NMB-R) (Neuromedin-B-preferring bombesin receptor)                                                                                                |
| NMD3A_HUMAN | chembl | Q8WXI6 | Glutamate [NMDA] receptor subunit 3A precursor (N-methyl-D-aspartate receptor subtype NR3A) (NMDAR-L)                                                                    |
| NMD3A_RAT   | chembl | O09098 | Glutamate [NMDA] receptor subunit 3A precursor (N-methyl-D-aspartate receptor subtype 3A) (NR3A) (NMDAR-L) (NMDAR-L1) (N-methyl-D-aspartate receptor) (Chi-1)            |
| NMD3B_HUMAN | chembl | O60391 | Glutamate [NMDA] receptor subunit 3B precursor (N-methyl-D-aspartate receptor subtype NR3B) (NR3B) (NMDAR3B)                                                             |
| NMD3B_MOUSE | chembl | Q91ZU9 | Glutamate [NMDA] receptor subunit 3B precursor (N-methyl-D-aspartate receptor subunit NR3B) (NR3B) (NMDAR3B) (NMDA receptor NR4) (Nr4)                                   |
| NMD3B_RAT   | chembl | Q8VHN2 | Glutamate [NMDA] receptor subunit 3B precursor (N-methyl-D-aspartate receptor subtype 3B) (NR3B) (NMDAR3B)                                                               |
| NMDE1_MOUSE | chembl | P35436 | Glutamate [NMDA] receptor subunit epsilon 1 precursor (N-methyl D-aspartate receptor subtype 2A) (NR2A) (NMDAR2A)                                                        |
| NMDE2_HUMAN | chembl | Q14CU4 | Glutamate [NMDA] receptor subunit epsilon 2 precursor (N-methyl D-aspartate receptor subtype 2B) (NR2B) (NMDAR2B) (N-methyl-D-aspartate receptor subunit 3) (NR3) (hNR3) |
| NMDE2_MOUSE | chembl | Q01097 | Glutamate [NMDA] receptor subunit epsilon 2 precursor (N-methyl D-aspartate receptor subtype 2B) (NR2B) (NMDAR2B)                                                        |
| NMDE2_RAT   | chembl | Q62684 | Glutamate [NMDA] receptor subunit epsilon 2 precursor (N-methyl D-aspartate receptor subtype 2B) (NR2B) (NMDAR2B)                                                        |
| NMDE3_HUMAN | chembl | B2RTT1 | Glutamate [NMDA] receptor subunit epsilon 3 precursor (N-methyl D-aspartate receptor subtype 2C) (NR2C) (NMDAR2C)                                                        |
| NMDE3_MOUSE | chembl | Q01098 | Glutamate [NMDA] receptor subunit epsilon 3                                                                                                                              |

|             |        |        |                                                                                                                                                                                               |
|-------------|--------|--------|-----------------------------------------------------------------------------------------------------------------------------------------------------------------------------------------------|
| NMDE3_RAT   | chembl | Q00961 | precursor (N-methyl D-aspartate receptor subtype 2C) (NR2C) (NMDAR2C)<br>Glutamate [NMDA] receptor subunit epsilon 3<br>precursor (N-methyl D-aspartate receptor subtype 2C) (NR2C) (NMDAR2C) |
| NMDE4_HUMAN | chembl | O15399 | Glutamate [NMDA] receptor subunit epsilon 4<br>precursor (N-methyl D-aspartate receptor subtype 2D) (NR2D) (NMDAR2D) (EB11)                                                                   |
| NMDE4_MOUSE | chembl | Q03391 | Glutamate [NMDA] receptor subunit epsilon 4<br>precursor (N-methyl D-aspartate receptor subtype 2D) (NR2D) (NMDAR2D)                                                                          |
| NMDE4_RAT   | chembl | Q63730 | Glutamate [NMDA] receptor subunit epsilon 4<br>precursor (N-methyl D-aspartate receptor subtype 2D) (NR2D) (NMDAR2D)                                                                          |
| NMDZ1_HUMAN | chembl | P35437 | Glutamate [NMDA] receptor subunit zeta 1<br>precursor (N-methyl-D-aspartate receptor subunit NR1)                                                                                             |
| NMDZ1_MOUSE | chembl | P35438 | Glutamate [NMDA] receptor subunit zeta 1<br>precursor (N-methyl-D-aspartate receptor subunit NR1)                                                                                             |
| NMDZ1_RAT   | chembl | P35439 | Glutamate [NMDA] receptor subunit zeta 1<br>precursor (N-methyl-D-aspartate receptor subunit NR1) (NMD-R1) (N-methyl-D-aspartate receptor)                                                    |
| NMT1_HUMAN  | chembl | P30419 | Glycylpeptide N-tetradecanoyltransferase 1<br>(Peptide N-myristoyltransferase 1) (Myristoyl-CoA:protein N-myristoyltransferase 1) (NMT 1) (Type I N-myristoyltransferase)                     |
| NMT2_HUMAN  | chembl | O60551 | Glycylpeptide N-tetradecanoyltransferase 2<br>(Peptide N-myristoyltransferase 2) (Myristoyl-CoA:protein N-myristoyltransferase 2) (NMT 2) (Type II N-myristoyltransferase)                    |
| NOS1_HUMAN  | chembl | P29475 | Nitric-oxide synthase, brain (NOS, type I) (Neuronal NOS) (N-NOS) (nNOS) (Constitutive NOS) (NC-NOS) (bNOS)                                                                                   |
| NOS1_MOUSE  | chembl | Q64208 | Nitric-oxide synthase, brain (NOS, type I) (Neuronal NOS) (N-NOS) (nNOS) (Constitutive NOS) (NC-NOS) (bNOS)                                                                                   |
| NOS2_HUMAN  | chembl | Q16692 | Nitric oxide synthase, inducible (NOS, type II) (Inducible NOS) (iNOS) (Hepatocyte NOS) (HEP-NOS)                                                                                             |

|              |        |        |                                                                                                                                                                                                                                        |
|--------------|--------|--------|----------------------------------------------------------------------------------------------------------------------------------------------------------------------------------------------------------------------------------------|
| NOS3_BOVIN   | chembl | P29473 | Nitric-oxide synthase, endothelial (EC-NOS) (NOS, type III) (NOSIII) (Endothelial NOS) (eNOS) (Constitutive NOS) (cNOS)                                                                                                                |
| NPFF2_RAT    | chembl | Q9EQD2 | Neuropeptide FF receptor 2 (Neuropeptide G protein-coupled receptor) (G protein-coupled receptor 74)                                                                                                                                   |
| NPY2R_HUMAN  | chembl | Q6AZZ6 | Neuropeptide Y receptor type 2 (NPY2-R) (NPY-Y2 receptor)                                                                                                                                                                              |
| NPY5R_MOUSE  | chembl | O70342 | Neuropeptide Y receptor type 5 (NPY5-R) (NPY-Y5 receptor) (Y5 receptor)                                                                                                                                                                |
| NPY5R_RAT    | chembl | Q63634 | Neuropeptide Y receptor type 5 (NPY5-R) (NPY-Y5 receptor) (Y5 receptor)                                                                                                                                                                |
| NQO2_HUMAN   | chembl | P16083 | NRH dehydrogenase [quinone] 2 (Quinone reductase 2) (QR2) (NRH:quinone oxidoreductase 2)                                                                                                                                               |
| NRAM_I34A1   | chembl | P03468 | Neuraminidase                                                                                                                                                                                                                          |
| NRAM_INBLE   | chembl | P03474 | Neuraminidase                                                                                                                                                                                                                          |
| NRP1_HUMAN   | chembl | B0LPG9 | Neuropilin-1 precursor (Vascular endothelial cell growth factor 165 receptor) (CD304 antigen).                                                                                                                                         |
| NSMA_RAT     | chembl | Q9ET64 | Sphingomyelin phosphodiesterase 2 (Neutral sphingomyelinase) (nSMase) (Lyso-platelet activating factor-phospholipase C) (Lyso-PAF-PLC)                                                                                                 |
| NTCP2_HUMAN  | chembl | Q13839 | Ileal sodium/bile acid cotransporter (Ileal Na(+)/bile acid cotransporter) (Na(+)-dependent ileal bile acid transporter) (Ileal sodium-dependent bile acid transporter) (ISBT) (Sodium/taurocholate cotransporting polypeptide, ileal) |
| NTR2_MOUSE   | chembl | P70310 | Neurotensin receptor type 2 (NT-R-2) (Low-affinity levocabastine-sensitive neurotensin receptor) (NTRL)                                                                                                                                |
| NU1M_HUMAN   | chembl | Q37523 | NADH-ubiquinone oxidoreductase chain 1                                                                                                                                                                                                 |
| NU2M_HUMAN   | chembl | Q34769 | NADH-ubiquinone oxidoreductase chain 2                                                                                                                                                                                                 |
| NU3M_HUMAN   | chembl | P03897 | NADH-ubiquinone oxidoreductase chain 3                                                                                                                                                                                                 |
| NU4LM_HUMAN  | chembl | P03901 | NADH-ubiquinone oxidoreductase chain 4L                                                                                                                                                                                                |
| NU4M_HUMAN   | chembl | Q6RL39 | NADH-ubiquinone oxidoreductase chain 4                                                                                                                                                                                                 |
| NU5M_HUMAN   | chembl | Q34773 | NADH-ubiquinone oxidoreductase chain 5                                                                                                                                                                                                 |
| NU6M_HUMAN   | chembl | P03923 | NADH-ubiquinone oxidoreductase chain 6                                                                                                                                                                                                 |
| O07911_STAAU | chembl | O07911 | AgrC                                                                                                                                                                                                                                   |

|              |        |            |                                                                                                                                                                          |
|--------------|--------|------------|--------------------------------------------------------------------------------------------------------------------------------------------------------------------------|
| O17793_CAEEL | chembl | Q17327     | glutamate-gated chloride channel (52.5 kD) (glc-1) [Caenorhabditis elegans]                                                                                              |
| O30463_MYCAV | chembl | O30463     | Dihydrofolate reductase                                                                                                                                                  |
| O35880_RAT   | chembl | O35880     | Isoleucyl tRNA synthetase                                                                                                                                                |
| O49150_SOLTU | chembl | O49150     | 5-lipoxygenase.                                                                                                                                                          |
| O77669_CANFA | chembl | O77669     | Coagulation factor X                                                                                                                                                     |
| O77773_PIG   | chembl | O77773     | Voltage-dependent calcium channel alpha-2 delta subunit precursor.                                                                                                       |
| O77823_PIG   | chembl | O77823     | Cyclic AMP-specific phosphodiesterase SSPDE4A1A                                                                                                                          |
| O88420_RAT   | chembl | O88420_RAT | sodium channel, voltage-gated, type 8, alpha polypeptide [Rattus norvegicus]                                                                                             |
| O93874_CURLU | chembl | O93874     | 17beta-hydroxysteroid dehydrogenase [Cochliobolus lunatus]                                                                                                               |
| OPRD_MOUSE   | chembl | P32300     | Delta-type opioid receptor (DOR-1) (K56) (MSL-2)                                                                                                                         |
| OPRD_PIG     | chembl | P79291     | Delta-type opioid receptor (DOR-1)                                                                                                                                       |
| OPRD_RAT     | chembl | P33533     | Delta-type opioid receptor (DOR-1) (Opioid receptor A)                                                                                                                   |
| OPRK_CAVPO   | chembl | P41144     | Kappa-type opioid receptor (KOR-1)                                                                                                                                       |
| OPRK_MOUSE   | chembl | P33534     | Kappa-type opioid receptor (KOR-1) (MSL-1)                                                                                                                               |
| OPRK_RAT     | chembl | P34975     | Kappa-type opioid receptor (KOR-1)                                                                                                                                       |
| OPRM_BOVIN   | chembl | P79350     | Mu-type opioid receptor (MOR-1)                                                                                                                                          |
| OPRM_CAVPO   | chembl | P97266     | Mu-type opioid receptor (MOR-1)                                                                                                                                          |
| OPRM_MOUSE   | chembl | Q60768     | Mu-type opioid receptor (MOR-1)                                                                                                                                          |
| OPRS1_CAVPO  | chembl | Q60492     | Sigma1-receptor (Sterol-isomerase like protein).                                                                                                                         |
| OPRS1_HUMAN  | chembl | Q53GN2     | opioid receptor, sigma 1 isoform 1 [Homo sapiens]                                                                                                                        |
| OPRS1_MOUSE  | chembl | O55242     | opioid receptor, sigma 1 [Mus musculus]                                                                                                                                  |
| OPRX_HUMAN   | chembl | Q9H4K4     | Nociceptin receptor (Orphanin FQ receptor) (Kappa-type 3 opioid receptor) (KOR-3)                                                                                        |
| OPRX_RAT     | chembl | P35370     | Nociceptin receptor (Orphanin FQ receptor) (Kappa-type 3 opioid receptor) (KOR-3) (ROR-C) (XOR1)                                                                         |
| OST48_HUMAN  | chembl | Q9BUI2     | Dolichyl-diphosphooligosaccharide--protein glycosyltransferase 48 kDa subunit precursor (Oligosaccharyl transferase 48 kDa subunit) (DDOST 48 kDa subunit) (OK/SW-cl.45) |
| OXGR1_RAT    | chembl | Q6Y1R5     | G protein-coupled receptor 80 [Rattus norvegicus]                                                                                                                        |
| OXYR_RAT     | chembl | Q53ZC5     | Oxytocin receptor (OT-R)                                                                                                                                                 |
| P2RX7_RAT    | chembl | Q64663     | P2X purinoceptor 7 (ATP receptor) (P2X7)                                                                                                                                 |

|              |        |        |                                                                                                                                                                                |
|--------------|--------|--------|--------------------------------------------------------------------------------------------------------------------------------------------------------------------------------|
| P2RY1_HUMAN  | chembl | P47900 | (Purinergic receptor) (P2Z receptor)<br>P2Y purinoceptor 1 (ATP receptor) (P2Y1)<br>(Purinergic receptor)                                                                      |
| P4HTM_HUMAN  | chembl | Q6PAG6 | Putative HIF-prolyl hydroxylase PH-4 (Hypoxia-inducible factor prolyl 4-hydroxylase)                                                                                           |
| P4K2A_HUMAN  | chembl | Q9BTU6 | phosphatidylinositol 4-kinase type II [Homo sapiens]                                                                                                                           |
| P4K2B_HUMAN  | chembl | Q9NUW2 | phosphatidylinositol 4-kinase type-II beta [Homo sapiens]                                                                                                                      |
| P53_HUMAN    | chembl | P04637 | Cellular tumor antigen p53 (Tumor suppressor p53)<br>(Phosphoprotein p53) (Antigen NY-CO-13)                                                                                   |
| P85A_HUMAN   | chembl | Q15747 | Phosphatidylinositol 3-kinase regulatory alpha subunit (PI3-kinase p85-alpha subunit) (PtdIns-3-kinase p85-alpha) (PI3K)                                                       |
| P85B_HUMAN   | chembl | Q9UPH9 | Phosphatidylinositol 3-kinase regulatory beta subunit (PI3-kinase p85-beta subunit) (PtdIns-3-kinase p85-beta)                                                                 |
| P88142_9HIV2 | chembl | P88142 | Pol polyprotein                                                                                                                                                                |
| P89449_HHV2H | chembl | P89449 | protease [Human herpesvirus 2]                                                                                                                                                 |
| P89582_9HIV2 | chembl | P89582 | Integrase                                                                                                                                                                      |
| P97706_RAT   | chembl | P97706 | sodium channel, voltage-gated, type 6, alpha polypeptide [Rattus norvegicus]                                                                                                   |
| PA21B_PIG    | chembl | P00592 | Phospholipase A2, major isoenzyme precursor (Phosphatidylcholine 2-acylhydrolase) (Group IB phospholipase A2)                                                                  |
| PA24B_HUMAN  | chembl | P0C869 | phospholipase A2, group IVB [Homo sapiens]                                                                                                                                     |
| PA24C_HUMAN  | chembl | Q9UG68 | Cytosolic phospholipase A2 gamma (cPLA2-gamma) (Phospholipase A2 group IVC)                                                                                                    |
| PA24D_HUMAN  | chembl | Q86XP0 | phospholipase A2, group IVD [Homo sapiens]                                                                                                                                     |
| PA2G5_HUMAN  | chembl | Q8N435 | Calcium-dependent phospholipase A2 precursor (Phosphatidylcholine 2-acylhydrolase) (PLA2-10) (Group V phospholipase A2)                                                        |
| PA2G6_HUMAN  | chembl | Q9UIT0 | 85 kDa calcium-independent phospholipase A2 (iPLA2) (CaI-PLA2) (Group VI phospholipase A2) (GVI PLA2)                                                                          |
| PA2GD_HUMAN  | chembl | B1AEL9 | Group IID secretory phospholipase A2 precursor (Phosphatidylcholine 2-acylhydrolase GIID) (GIID sPLA2) (PLA2IID) (sPLA(2)-IID) (Secretory-type PLA, stroma-associated homolog) |
| PA2GE_HUMAN  | chembl | Q5VXJ8 | Group IIE secretory phospholipase A2 precursor (Phosphatidylcholine 2-acylhydrolase GIIE) (GIIE                                                                                |

|             |        |        |                                                                                                                                                         |
|-------------|--------|--------|---------------------------------------------------------------------------------------------------------------------------------------------------------|
| PA2GF_HUMAN | chembl | Q5R385 | sPLA2) (sPLA(2)-IIE)<br>Group IIF secretory phospholipase A2 precursor (Phosphatidylcholine 2-acylhydrolase GIIF) (GIIF sPLA2) (sPLA(2)-IIF)            |
| PA2GX_HUMAN | chembl | O15496 | Group X secretory phospholipase A2 precursor (Phosphatidylcholine 2-acylhydrolase GX) (GX sPLA2) (sPLA2-X)                                              |
| PAI1_HUMAN  | chembl | P05121 | Plasminogen activator inhibitor-1 precursor (PAI-1) (Endothelial plasminogen activator inhibitor) (PAI)                                                 |
| PARC_STAAU  | chembl | P95683 | Topoisomerase IV subunit A                                                                                                                              |
| PARP1_MOUSE | chembl | P11103 | Poly [ADP-ribose] polymerase-1 (PARP-1) (ADPRT) (NAD(+) ADP-ribosyltransferase-1) (Poly[ADP-ribose] synthetase-1) (msPARP)                              |
| PCKGM_HUMAN | chembl | Q16822 | Phosphoenolpyruvate carboxykinase, mitochondrial precursor [GTP] (Phosphoenolpyruvate carboxylase) (PEPCK-M)                                            |
| PCP_HUMAN   | chembl | P42785 | Lysosomal Pro-X carboxypeptidase precursor (Prolylcarboxypeptidase) (PRCP) (Proline carboxypeptidase) (Angiotensinase C) (Lysosomal carboxypeptidase C) |
| PCTK1_HUMAN | chembl | A8K280 | Serine/threonine-protein kinase PCTAIRE-1 (EC 2.7.11.22) (PCTAIRE- motif protein kinase 1).                                                             |
| PD2R_MOUSE  | chembl | P70263 | Prostaglandin D2 receptor (Prostanoid DP receptor) (PGD receptor)                                                                                       |
| PDE10_HUMAN | chembl | Q9Y5T1 | cAMP and cAMP-inhibited cGMP 3,5-cyclic phosphodiesterase 10A                                                                                           |
| PDE1A_HUMAN | chembl | Q9C0K9 | Calcium/calmodulin-dependent 3,5-cyclic nucleotide phosphodiesterase 1A (Cam-PDE 1A) (61 kDa Cam-PDE) (hCam-1)                                          |
| PDE1B_BOVIN | chembl | Q01061 | Calcium/calmodulin-dependent 3,5-cyclic nucleotide phosphodiesterase 1B (Cam-PDE 1B) (63 kDa Cam-PDE)                                                   |
| PDE1B_HUMAN | chembl | Q92825 | Calcium/calmodulin-dependent 3,5-cyclic nucleotide phosphodiesterase 1B (Cam-PDE 1B) (63 kDa Cam-PDE)                                                   |
| PDE1B_RAT   | chembl | Q01066 | Calcium/calmodulin-dependent 3,5-cyclic nucleotide phosphodiesterase 1B (Cam-PDE 1B) (63 kDa Cam-PDE)                                                   |
| PDE1C_HUMAN | chembl | B3KPC6 | Calcium/calmodulin-dependent 3,5-cyclic nucleotide phosphodiesterase 1C (Cam-PDE 1C) (hCam-3)                                                           |

|             |        |        |                                                                                                                        |
|-------------|--------|--------|------------------------------------------------------------------------------------------------------------------------|
| PDE1C_RAT   | chembl | Q63421 | Calcium/calmodulin-dependent 3,5-cyclic nucleotide phosphodiesterase 1C (Cam-PDE 1C)                                   |
| PDE2A_HUMAN | chembl | O00408 | cGMP-dependent 3,5-cyclic phosphodiesterase (Cyclic GMP stimulated phosphodiesterase) (CGS-PDE) (cGSPDE)               |
| PDE3B_HUMAN | chembl | Q6SEI4 | cGMP-inhibited 3,5-cyclic phosphodiesterase B (Cyclic GMP inhibited phosphodiesterase B) (CGI-PDE B) (CGIPDE1) (CGIP1) |
| PDE4A_MOUSE | chembl | Q9QX48 | cAMP-dependent 3,5-cyclic phosphodiesterase 4A                                                                         |
| PDE4A_RAT   | chembl | P14645 | cAMP-specific 3,5-cyclic phosphodiesterase 4A (DPDE2)                                                                  |
| PDE4B_RAT   | chembl | Q8VD82 | cAMP-specific 3,5-cyclic phosphodiesterase 4B (DPDE4)                                                                  |
| PDE4C_RAT   | chembl | P14644 | cAMP-specific 3,5-cyclic phosphodiesterase 4C (DPDE1)                                                                  |
| PDE4D_MOUSE | chembl | Q8C4Q7 | cAMP-specific 3,5-cyclic phosphodiesterase 4D (DPDE3)                                                                  |
| PDE4D_RAT   | chembl | P14270 | cAMP-specific 3,5-cyclic phosphodiesterase 4D (DPDE3)                                                                  |
| PDE5A_BOVIN | chembl | Q28156 | cGMP-specific 3,5-cyclic phosphodiesterase (CGB-PDE) (cGMP-binding cGMP-specific phosphodiesterase)                    |
| PDE5A_RAT   | chembl | O54735 | cGMP-specific 3,5-cyclic phosphodiesterase (CGB-PDE) (cGMP-binding cGMP-specific phosphodiesterase)                    |
| PDE6A_BOVIN | chembl | P11541 | Rod cGMP-specific 3,5-cyclic phosphodiesterase alpha-subunit (GMP-PDE alpha) (PDE V-B1)                                |
| PDE6A_HUMAN | chembl | Q0P638 | Rod cGMP-specific 3,5-cyclic phosphodiesterase alpha-subunit (GMP-PDE alpha) (PDE V-B1)                                |
| PDE6B_HUMAN | chembl | Q53XN5 | Rod cGMP-specific 3,5-cyclic phosphodiesterase beta-subunit (GMP-PDE beta)                                             |
| PDE6C_BOVIN | chembl | P16586 | Cone cGMP-specific 3,5-cyclic phosphodiesterase alpha-subunit (PDE V-C1)                                               |
| PDE6C_HUMAN | chembl | A6NCR6 | Cone cGMP-specific 3,5-cyclic phosphodiesterase alpha-subunit                                                          |
| PDE6D_BOVIN | chembl | Q95142 | Retinal rod rhodopsin-sensitive cGMP 3,5-cyclic phosphodiesterase delta-subunit (GMP-PDE delta)                        |
| PDE6D_HUMAN | chembl | O43250 | Retinal rod rhodopsin-sensitive cGMP 3,5-cyclic phosphodiesterase delta-subunit (GMP-PDE delta) (p17 protein)          |

|             |        |        |                                                                                                                                    |
|-------------|--------|--------|------------------------------------------------------------------------------------------------------------------------------------|
| PDE7A_RAT   | chembl | O08593 | High-affinity cAMP-specific 3,5-cyclic phosphodiesterase 7A (Rolipram-insensitive phosphodiesterase type 7)                        |
| PDE7B_HUMAN | chembl | Q9NP56 | cAMP-specific 3,5-cyclic phosphodiesterase 7B                                                                                      |
| PDK1_HUMAN  | chembl | B2R6T1 | [Pyruvate dehydrogenase [lipoamide]] kinase isozyme 1, mitochondrial precursor (Pyruvate dehydrogenase kinase isoform 1)           |
| PDK2_HUMAN  | chembl | A8K3A7 | [Pyruvate dehydrogenase [lipoamide]] kinase isozyme 2, mitochondrial precursor (Pyruvate dehydrogenase kinase isoform 2)           |
| PDK2_RAT    | chembl | Q64536 | [Pyruvate dehydrogenase [lipoamide]] kinase isozyme 2, mitochondrial precursor (Pyruvate dehydrogenase kinase isoform 2) (PDK P45) |
| PDK3_HUMAN  | chembl | Q15120 | [Pyruvate dehydrogenase [lipoamide]] kinase isozyme 3, mitochondrial precursor (Pyruvate dehydrogenase kinase isoform 3)           |
| PDK4_HUMAN  | chembl | Q16654 | [Pyruvate dehydrogenase [lipoamide]] kinase isozyme 4, mitochondrial precursor (Pyruvate dehydrogenase kinase isoform 4)           |
| PE2R1_MOUSE | chembl | P35375 | Prostaglandin E2 receptor, EP1 subtype (Prostanoid EP1 receptor) (PGE receptor, EP1 subtype)                                       |
| PE2R2_MOUSE | chembl | Q62053 | Prostaglandin E2 receptor, EP2 subtype (Prostanoid EP2 receptor) (PGE receptor, EP2 subtype)                                       |
| PE2R2_RAT   | chembl | Q62928 | Prostaglandin E2 receptor, EP2 subtype (Prostanoid EP2 receptor) (PGE receptor, EP2 subtype).                                      |
| PE2R3_MOUSE | chembl | P30557 | Prostaglandin E2 receptor, EP3 subtype (Prostanoid EP3 receptor) (PGE receptor, EP3 subtype)                                       |
| PE2R4_MOUSE | chembl | P32240 | Prostaglandin E2 receptor, EP4 subtype (Prostanoid EP4 receptor) (PGE receptor, EP4 subtype)                                       |
| PE2R4_RAT   | chembl | P43114 | Prostaglandin E2 receptor, EP4 subtype (Prostanoid EP4 receptor) (PGE receptor, EP4 subtype)                                       |
| PEN2_HUMAN  | chembl | B2R5L9 | Gamma-secretase subunit PEN-2 (Presenilin enhancer protein 2) (MDS033)                                                             |
| PENP_PENJA  | chembl | P00798 | Penicillopepsin (Peptidase A)                                                                                                      |



|             |        |        |                                                                                                                                                                             |
|-------------|--------|--------|-----------------------------------------------------------------------------------------------------------------------------------------------------------------------------|
| PEPA_HUMAN  | chembl | Q7M4R0 | Pepsin A precursor<br>Xaa-Pro dipeptidase (X-Pro dipeptidase) (Proline dipeptidase) (Prolidase) (Imidodipeptidase)                                                          |
| PEPD_HUMAN  | chembl | Q8TBN9 |                                                                                                                                                                             |
| PERM_HUMAN  | chembl | Q4PJH5 | Myeloperoxidase precursor (MPO)<br>Prostaglandin F2-alpha receptor (Prostanoid FP receptor) (PGF receptor) (PGF2 alpha receptor)                                            |
| PF2R_BOVIN  | chembl | P37289 |                                                                                                                                                                             |
| PGES2_HUMAN | chembl | Q9H7Z7 | Hypothetical protein FLJ14038 (Prostaglandin E synthase 2, isoform 1)                                                                                                       |
| PGFRA_MOUSE | chembl | Q8C4N3 | Alpha platelet-derived growth factor receptor precursor (PDGF-R-alpha)                                                                                                      |
| PGFRA_RAT   | chembl | P20786 | Alpha platelet-derived growth factor receptor precursor (PDGF-R-alpha)                                                                                                      |
| PGFRB_HUMAN | chembl | P09619 | Beta platelet-derived growth factor receptor precursor (PDGF-R-beta) (CD140b antigen)                                                                                       |
| PGFRB_MOUSE | chembl | P05622 | Beta platelet-derived growth factor receptor precursor (PDGF-R-beta)                                                                                                        |
| PGFRB_RAT   | chembl | Q8R406 | Beta platelet-derived growth factor receptor precursor (PDGF-R-beta)                                                                                                        |
| PGH1_BOVIN  | chembl | A7YWD4 | Prostaglandin G/H synthase 1 (Cyclooxygenase-1) (COX-1) (Prostaglandin-endoperoxide synthase 1) (Prostaglandin H2 synthase 1) (PGH synthase 1) (PGHS-1) (PHS 1)             |
| PGH1_MOUSE  | chembl | P22437 | Prostaglandin G/H synthase 1 precursor (Cyclooxygenase -1) (COX-1) (Prostaglandin-endoperoxide synthase 1) (Prostaglandin H2 synthase 1) (PGH synthase 1) (PGHS-1) (PHS 1)  |
| PGH1_RAT    | chembl | Q63921 | Prostaglandin G/H synthase 1 precursor (Cyclooxygenase -1) (COX-1) (Prostaglandin-endoperoxide synthase 1) (Prostaglandin H2 synthase 1) (PGH synthase 1) (PGHS-1) (PHS 1)  |
| PGH1_SHEEP  | chembl | P05979 | Prostaglandin G/H synthase 1 precursor (Cyclooxygenase -1) (COX-1) (Prostaglandin-endoperoxide synthase 1) (Prostaglandin H2 synthase 1) (PGH synthase 1) (PGHS-1) (PHS 1)  |
| PGH2_BOVIN  | chembl | O62665 | Prostaglandin G/H synthase 2 precursor (Cyclooxygenase -2) (COX-2) (Prostaglandin-endoperoxide synthase 2) (Prostaglandin H2 synthase 2) (PGH synthase 2) (PGHS-2) (PHS II) |
| PGH2_MOUSE  | chembl | Q05769 | Cyclooxygenase -2 (COX-2) (Prostaglandin-endoperoxide synthase 2) (Prostaglandin H2                                                                                         |

|             |        |        |                                                                                                                                                                                                                                                                                                                                                                                                                                                                                                 |
|-------------|--------|--------|-------------------------------------------------------------------------------------------------------------------------------------------------------------------------------------------------------------------------------------------------------------------------------------------------------------------------------------------------------------------------------------------------------------------------------------------------------------------------------------------------|
| PGH2_RAT    | chembl | Q925V4 | synthase 2) (PGH synthase 2) (PGHS-2) (PHS II) (Glucocorticoid-regulated inflammatory cyclooxygenase) (Gripghs) (TIS10 protein) (PES-2) Prostaglandin G/H synthase 2 precursor (Cyclooxygenase -2) (COX-2) (Prostaglandin-endoperoxide synthase 2) (Prostaglandin H2 synthase 2) (PGH synthase 2) (PGHS-2) (PHS II) Prostaglandin G/H synthase 2 precursor (Cyclooxygenase -2) (COX-2) (Prostaglandin-endoperoxide synthase 2) (Prostaglandin H2 synthase 2) (PGH synthase 2) (PGHS-2) (PHS II) |
| PGH2_SHEEP  | chembl | P79208 | Prostaglandin G/H synthase 2 precursor (Cyclooxygenase -2) (COX-2) (Prostaglandin-endoperoxide synthase 2) (Prostaglandin H2 synthase 2) (PGH synthase 2) (PGHS-2) (PHS II) Prostaglandin G/H synthase 2 precursor (Cyclooxygenase -2) (COX-2) (Prostaglandin-endoperoxide synthase 2) (Prostaglandin H2 synthase 2) (PGH synthase 2) (PGHS-2) (PHS II)                                                                                                                                         |
| PGK1_HUMAN  | chembl | P00558 | Phosphoglycerate kinase 1 (Primer recognition protein 2) (PRP 2) (OK/SW-cl.110)                                                                                                                                                                                                                                                                                                                                                                                                                 |
| PGK2_HUMAN  | chembl | B2R6Y8 | Phosphoglycerate kinase, testis specific                                                                                                                                                                                                                                                                                                                                                                                                                                                        |
| PGTB1_BOVIN | chembl | Q5EAD5 | Protein geranylgeranyltransferase type I, beta subunit                                                                                                                                                                                                                                                                                                                                                                                                                                          |
| PGTB1_HUMAN | chembl | Q5MJP9 | Geranylgeranyl transferase type I beta subunit (Type I protein geranyl-geranyltransferase beta subunit) (GGTase-I-beta)                                                                                                                                                                                                                                                                                                                                                                         |
| PHKG1_HUMAN | chembl | Q16816 | Phosphorylase b kinase gamma catalytic chain, skeletal muscle isoform (Phosphorylase kinase gamma subunit 1)                                                                                                                                                                                                                                                                                                                                                                                    |
| PHKG2_HUMAN | chembl | P15735 | Phosphorylase b kinase gamma catalytic chain, testis/liver isoform (PHK-gamma-T) (Phosphorylase kinase gamma subunit 2) (PSK-C3)                                                                                                                                                                                                                                                                                                                                                                |
| PI4KA_HUMAN | chembl | Q9UPG2 | Phosphatidylinositol 4-kinase alpha (PI4-kinase) (PtdIns-4-kinase) (PI4K-alpha)                                                                                                                                                                                                                                                                                                                                                                                                                 |
| PI4KB_HUMAN | chembl | O15096 | Phosphatidylinositol 4-kinase beta (PtdIns 4-kinase) (PI4Kbeta) (PI4K-beta) (NPIK) (PI4K92)                                                                                                                                                                                                                                                                                                                                                                                                     |
| PIM1_HUMAN  | chembl | Q5T7H7 | Proto-oncogene serine/threonine-protein kinase Pim-1                                                                                                                                                                                                                                                                                                                                                                                                                                            |
| PIM2_HUMAN  | chembl | Q9P1W9 | Serine/threonine-protein kinase Pim-2 (EC 2.7.11.1) (Pim-2h).                                                                                                                                                                                                                                                                                                                                                                                                                                   |
| PK3CA_BOVIN | chembl | P32871 | Phosphatidylinositol-4,5-bisphosphate 3-kinase catalytic subunit, alpha isoform (PI3-kinase p110 subunit alpha) (PtdIns-3-kinase p110) (PI3K)                                                                                                                                                                                                                                                                                                                                                   |
| PK3CA_HUMAN | chembl | Q99762 | Phosphatidylinositol-4,5-bisphosphate 3-kinase catalytic subunit, alpha isoform (PI3-kinase p110 subunit alpha) (PtdIns-3-kinase p110) (PI3K)                                                                                                                                                                                                                                                                                                                                                   |
| PK3CB_HUMAN | chembl | P42338 | Phosphatidylinositol-4,5-bisphosphate 3-kinase                                                                                                                                                                                                                                                                                                                                                                                                                                                  |

|             |        |        |                                                                                                                                                                                                                                                                      |
|-------------|--------|--------|----------------------------------------------------------------------------------------------------------------------------------------------------------------------------------------------------------------------------------------------------------------------|
| PK3CD_HUMAN | chembl | O00329 | catalytic subunit, beta isoform (PI3-kinase p110 subunit beta) (PtdIns-3-kinase p110) (PI3K) (PI3Kbeta)<br>Phosphatidylinositol-4,5-bisphosphate 3-kinase catalytic subunit, delta isoform (PI3-kinase p110 subunit delta) (PtdIns-3-kinase p110) (PI3K) (p110delta) |
| PK3CG_HUMAN | chembl | Q8IV23 | Phosphatidylinositol-4,5-bisphosphate 3-kinase catalytic subunit, gamma isoform (PI3-kinase p110 subunit gamma) (PtdIns-3-kinase p110) (PI3K) (PI3Kgamma)                                                                                                            |
| PLCB_HUMAN  | chembl | Q5VUD3 | 1-acyl-sn-glycerol-3-phosphate acyltransferase beta (1-AGP acyltransferase 2) (1-AGPAT 2) (Lysophosphatidic acid acyltransferase-beta) (LPAAT-beta) (1-acylglycerol-3-phosphate O-acyltransferase 2)                                                                 |
| PLCG2_HUMAN | chembl | Q3ZTS2 | 1-phosphatidylinositol-4,5-bisphosphate phosphodiesterase gamma 2 (Phosphoinositide phospholipase C) (PLC-gamma-2) (Phospholipase C-gamma-2) (PLC-IV)                                                                                                                |
| PLD2_HUMAN  | chembl | Q96BY3 | Phospholipase D2 (PLD 2) (Choline phosphatase 2) (Phosphatidylcholine-hydrolyzing phospholipase D2) (PLD1C) (hPLD2)                                                                                                                                                  |
| PLK1_HUMAN  | chembl | P53350 | Serine/threonine-protein kinase PLK1 (Polo-like kinase 1) (PLK-1) (Serine-threonine protein kinase 13) (STPK13)                                                                                                                                                      |
| PLK4_HUMAN  | chembl | B2RAL0 | Serine/threonine-protein kinase PLK4 (EC 2.7.11.21) (Polo-like kinase 4) (PLK-4) (Serine/threonine-protein kinase Sak) (Serine/threonine- protein kinase 18).                                                                                                        |
| PLMN_BOVIN  | chembl | P06868 | Plasminogen precursor                                                                                                                                                                                                                                                |
| PLMN_RAT    | chembl | Q9R0W3 | Plasminogen precursor [Contains: (Angiostatin) ]                                                                                                                                                                                                                     |
| PMT1_CANAL  | chembl | Q3MP65 | Dolichyl-phosphate-mannose--protein mannosyltransferase 1                                                                                                                                                                                                            |
| PNMT_BOVIN  | chembl | P10938 | Phenylethanolamine N-methyltransferase (PNMTase) (Noradrenaline N-methyltransferase)                                                                                                                                                                                 |
| PNMT_HUMAN  | chembl | P11086 | Phenylethanolamine N-methyltransferase (PNMTase) (Noradrenaline N-methyltransferase)                                                                                                                                                                                 |
| PNPH_BOVIN  | chembl | P55859 | Purine nucleoside phosphorylase (Inosine phosphorylase) (PNP)                                                                                                                                                                                                        |

|             |        |        |                                                                                                                                                                                                                          |
|-------------|--------|--------|--------------------------------------------------------------------------------------------------------------------------------------------------------------------------------------------------------------------------|
| PNPH_HUMAN  | chembl | B2R8S5 | Purine nucleoside phosphorylase (Inosine phosphorylase) (PNP)                                                                                                                                                            |
| POL_WMSV    | chembl | P03359 | Pol polyprotein [Contains: (Reverse transcriptase/ribonuclease H) (EC 3.1.26.4) (RT) ] [Contains: (Integrase) (IN) ]                                                                                                     |
| PP1A_HUMAN  | chembl | B2R908 | Serine/threonine protein phosphatase PP1-alpha catalytic subunit (PP-1A)                                                                                                                                                 |
| PP1G_HUMAN  | chembl | P36873 | Serine/threonine protein phosphatase PP1-gamma catalytic subunit (PP-1G) (Protein phosphatase 1C catalytic subunit)                                                                                                      |
| PP2AA_BOVIN | chembl | A6QLI7 | Serine/threonine protein phosphatase 2A, catalytic subunit, alpha isoform (PP2A-alpha)                                                                                                                                   |
| PP2AA_HUMAN | chembl | P67775 | Serine/threonine protein phosphatase 2A, catalytic subunit, alpha isoform (PP2A-alpha) (Replication protein C) (RP-C)                                                                                                    |
| PP2AB_HUMAN | chembl | Q6FHK5 | Serine/threonine protein phosphatase 2A, catalytic subunit, beta isoform (PP2A-beta)                                                                                                                                     |
| PP2BA_HUMAN | chembl | A8K3B7 | Serine/threonine protein phosphatase 2B catalytic subunit, alpha isoform (Calmodulin-dependent calcineurin A subunit, alpha isoform) (CAM-PRP catalytic subunit)                                                         |
| PP2BB_HUMAN | chembl | Q5F2F9 | Serine/threonine protein phosphatase 2B catalytic subunit, beta isoform (Calmodulin-dependent calcineurin A subunit, beta isoform) (CAM-PRP catalytic subunit)                                                           |
| PP2BC_HUMAN | chembl | Q9H4M5 | Serine/threonine protein phosphatase 2B catalytic subunit, gamma isoform (Calmodulin-dependent calcineurin A subunit, gamma isoform) (Calcineurin, testis-specific catalytic subunit) (CAM-PRP catalytic subunit)        |
| PPAC_HUMAN  | chembl | Q3KQX8 | Low molecular weight phosphotyrosine protein phosphatase (EC 3.1.3.48) (LMW-PTPase) (LMW-PTP) (Low molecular weight cytosolic acid phosphatase) (EC 3.1.3.2) (Red cell acid phosphatase 1) (Adipocyte acid phosphatase). |
| PPAP_HUMAN  | chembl | Q96KY0 | Prostatic acid phosphatase precursor                                                                                                                                                                                     |
| PPARA_CANFA | chembl | Q95N78 | Peroxisome proliferator activated receptor alpha (PPAR-alpha)                                                                                                                                                            |
| PPARA_MOUSE | chembl | P23204 | Peroxisome proliferator activated receptor alpha (PPAR-alpha)                                                                                                                                                            |

|             |        |        |                                                                                                                                                                                                                                        |
|-------------|--------|--------|----------------------------------------------------------------------------------------------------------------------------------------------------------------------------------------------------------------------------------------|
| PPARG_RAT   | chembl | Q9QWG0 | Peroxisome proliferator activated receptor gamma (PPAR-gamma)                                                                                                                                                                          |
| PPCE_HUMAN  | chembl | Q8N6D4 | Prolyl endopeptidase (Post-proline cleaving enzyme) (PE)                                                                                                                                                                               |
| PPCE_RAT    | chembl | O70196 | prolyl endopeptidase [Rattus norvegicus]                                                                                                                                                                                               |
| PPIA_RAT    | chembl | P10111 | Peptidyl-prolyl cis-trans isomerase A (PPIase) (Rotamase) (Cyclophilin A) (Cyclosporin A-binding protein) (P31)                                                                                                                        |
| PPM1B_HUMAN | chembl | O75688 | Protein phosphatase 2C beta isoform (PP2C-beta)                                                                                                                                                                                        |
| PPR_HHV11   | chembl | O09798 | protease [Human herpesvirus 1]                                                                                                                                                                                                         |
| PPR_HHV6U   | chembl | P24433 | protease /assembly protein [Human herpesvirus 6]                                                                                                                                                                                       |
| PRGR_CHICK  | chembl | Q90946 | Progesterone receptor (PR)                                                                                                                                                                                                             |
| PRGR_RABIT  | chembl | P06186 | Progesterone receptor (PR)                                                                                                                                                                                                             |
| PRGR_RAT    | chembl | Q63449 | Progesterone receptor (PR)                                                                                                                                                                                                             |
| PRKDC_HUMAN | chembl | Q59H99 | DNA-dependent protein kinase catalytic subunit (DNA-PKcs) (DNPK1) (p460)                                                                                                                                                               |
| PRO_HTL1A   | chembl | P10274 | Protease                                                                                                                                                                                                                               |
| PSA_HUMAN   | chembl | Q9NP16 | Puromycin-sensitive aminopeptidase (PSA)                                                                                                                                                                                               |
| PSB2_HUMAN  | chembl | P31145 | Proteasome subunit beta type 2 (EC 3.4.25.1) (Proteasome component C7- I) (Macropain subunit C7-I) (Multicatalytic endopeptidase complex subunit C7-I).                                                                                |
| PSB5_HUMAN  | chembl | Q9TNN9 | Proteasome subunit beta type 5 precursor (EC 3.4.25.1) (Proteasome epsilon chain) (Macropain epsilon chain) (Multicatalytic endopeptidase complex epsilon chain) (Proteasome subunit X) (Proteasome chain 6) (Proteasome subunit MB1). |
| PSN1_HUMAN  | chembl | Q15719 | Presenilin 1 (PS-1) (S182 protein)                                                                                                                                                                                                     |
| PSN2_HUMAN  | chembl | P49810 | Presenilin 2 (PS-2) (STM-2) (E5-1) (AD3LP) (AD5)                                                                                                                                                                                       |
| PTAFR_CAVPO | chembl | P21556 | Platelet activating factor receptor (PAF-R)                                                                                                                                                                                            |
| PTAFR_HUMAN | chembl | A3KMC8 | Platelet activating factor receptor (PAF-R)                                                                                                                                                                                            |
| PTAFR_MOUSE | chembl | Q62035 | Platelet activating factor receptor (PAF-R)                                                                                                                                                                                            |
| PTGDS_MOUSE | chembl | O09157 | Prostaglandin-H2 D-isomerase precursor (Lipocalin-type prostaglandin-D synthase) (Glutathione-independent PGD synthetase) (Prostaglandin-H2 D-isomerase) (PGD2 synthase) (PGDS2) (PGDS)                                                |
| PTK6_HUMAN  | chembl | Q58F01 | Tyrosine-protein kinase 6 (EC 2.7.10.2) (Breast tumor kinase) (Tyrosine-protein kinase BRK).                                                                                                                                           |

|              |        |        |                                                                                                                                                                                                                                  |
|--------------|--------|--------|----------------------------------------------------------------------------------------------------------------------------------------------------------------------------------------------------------------------------------|
| PTN13_HUMAN  | chembl | Q8IWH7 | Tyrosine-protein phosphatase, non-receptor type 13 (Protein-tyrosine phosphatase 1E) (PTP-E1) (hPTPE1) (PTP-BAS) (Protein-tyrosine phosphatase PTPL1) (Fas-associated protein-tyrosine phosphatase 1) (FAP-1)                    |
| PTN22_HUMAN  | chembl | O95064 | Tyrosine-protein phosphatase, non-receptor type 22 (Hematopoietic cell protein-tyrosine phosphatase 70Z-PEP) (Lymphoid phosphatase) (LyP)                                                                                        |
| PTN7_HUMAN   | chembl | Q9BV05 | Tyrosine-protein phosphatase, non-receptor type 7 (Protein-tyrosine phosphatase LC-PTP) (Hematopoietic protein-tyrosine phosphatase) (HEPTP)                                                                                     |
| PTPA_HUMAN   | chembl | Q15257 | Protein phosphatase 2A, regulatory subunit B (PP2A, subunit B, PR53 isoform) (Phosphotyrosyl phosphatase activator) (PTPA)                                                                                                       |
| PTPRF_HUMAN  | chembl | P10586 | Receptor-type tyrosine-protein phosphatase F precursor (LAR protein) (Leukocyte antigen related)                                                                                                                                 |
| PUR2_HUMAN   | chembl | A8K945 | (GARS) (Glycinamide ribonucleotide synthetase) (Phosphoribosylglycinamide synthetase) (AIRS) (Phosphoribosyl-aminoimidazole synthetase) (AIR synthase) (Phosphoribosylglycinamide formyltransferase) (GART) (GAR transformylase) |
| PUR2_MOUSE   | chembl | Q64737 | (GARS) (Glycinamide ribonucleotide synthetase) (Phosphoribosylglycinamide synthetase) (Phosphoribosylformylglycinamide cyclo-ligase) (AIRS) (Phosphoribosylglycinamide formyltransferase) (GART) (GAR transformylase)            |
| PYGL_MOUSE   | chembl | Q9ET01 | Glycogen phosphorylase, liver form                                                                                                                                                                                               |
| PYGL_RAT     | chembl | P09811 | Glycogen phosphorylase, liver form                                                                                                                                                                                               |
| PYR1_HUMAN   | chembl | Q6P0Q0 | CAD protein ) (Glutamine-dependent carbamoyl-phosphate synthase) (Aspartate carbamoyltransferase) (Dihydroorotase)                                                                                                               |
| PYRD_HUMAN   | chembl | Q6P176 | Dihydroorotate dehydrogenase, mitochondrial precursor (Dihydroorotate oxidase) (DHOdehase)                                                                                                                                       |
| PYRD_RAT     | chembl | Q63707 | Dihydroorotate dehydrogenase, mitochondrial precursor (Dihydroorotate oxidase) (DHOdehase)                                                                                                                                       |
| Q0GKD7_LEIDO | chembl | Q0GKD7 | Farnesyl pyrophosphate synthase.                                                                                                                                                                                                 |
| Q499N1_RAT   | chembl | Q499N1 | retinoic acid receptor, alpha [Rattus norvegicus]                                                                                                                                                                                |
| Q54A96_PLAFA | chembl | Q54A96 | Dihydroorotate dehydrogenase.                                                                                                                                                                                                    |
| Q59401_ENTCL | chembl | Q59401 | Class C beta-lactamase precursor                                                                                                                                                                                                 |

|              |        |              |                                                                                                       |
|--------------|--------|--------------|-------------------------------------------------------------------------------------------------------|
| Q5EI73_PLAFA | chembl | Q5EI73       | Protein farnesyltransferase alpha subunit                                                             |
| Q5EM59_BOVIN | chembl | Q5EM59       |                                                                                                       |
| Q5SWX4_HUMAN | chembl | Q5SWX4       |                                                                                                       |
| Q6GI75_STAAR | chembl | Q6GI75       | androgen receptor [Bos taurus]                                                                        |
| Q6L709_HHV2  | chembl | Q6L709       | calcium/calmodulin-dependent protein kinase II                                                        |
| Q6MGC4_RAT   | chembl | Q6MGC4       | gamma isoform 4 [Homo sapiens]                                                                        |
| Q6RY99_RAT   | chembl | Q6RY99       | enoyl-[acyl-carrier-protein] reductase [NADH]                                                         |
| Q6UB75_PIG   | chembl | Q6UB75       | [Staphylococcus aureus subsp. aureus MRSA252]                                                         |
| Q6W9J1_ENTCL | chembl | Q6W9J1       | thymidine kinase [Human herpesvirus 2]                                                                |
| Q70E71_9ENTE | chembl | Q70E71       | MHC class II region expressed gene KE2 [Rattus norvegicus]                                            |
| Q71G50_PLAF7 | chembl | Q71G50_PLAF7 | Gamma-hydroxybutyrate receptor                                                                        |
| Q72874_9HIV1 | chembl | Q72874       | Group VII phospholipase A2                                                                            |
| Q7ARH8_YERPE | chembl | Q74YY5       | TEM-1 beta-lactamase                                                                                  |
| Q7YY07_CRYPV | chembl | Q7YY07       | Aminoglycoside acetyltransferase.                                                                     |
| Q7YY76_CRYPV | chembl | Q7YY76       | Thioredoxin reductase 2.                                                                              |
| Q80T35_MOUSE | chembl | Q80T35       | retropepsin aspartic peptidase [Human immunodeficiency virus 1]                                       |
| Q80T43_MOUSE | chembl | Q80T43       | putative secreted protein-tyrosine phosphatase [Yersinia pestis CO92]                                 |
| Q80T47_MOUSE | chembl | Q80T47       | Putative histone deacetylase                                                                          |
| Q862F3_BOVIN | chembl | Q862F3       | Histone deacetylase                                                                                   |
| Q862L2_BOVIN | chembl | Q862L2       | metabotropic glutamate receptor 6 [Mus musculus]                                                      |
| Q864F1_PIG   | chembl | Q864F1       | metabotropic glutamate receptor 2 [Mus musculus]                                                      |
| Q8AWE3_CHICK | chembl | Q8AWE3       | metabotropic glutamate receptor 5 [Mus musculus]                                                      |
| Q8BGP7_MOUSE | chembl | Q8BGP7       | similar to alpha-tubulin isoform 1 [Bos taurus]                                                       |
| Q8CFB8_MOUSE | chembl | Q8CFB8       | similar to alpha-tubulin isoform 1 [Bos taurus]                                                       |
| Q8DNV6_STRR6 | chembl | Q8DNV6       | Phosphodiesterase isozyme 5                                                                           |
| Q8HZR1_CANFA | chembl | Q8HZR1       | Serine-threonine protein phosphatase 2A regulatory subunit                                            |
| Q8MHZ5_SHEEP | chembl | Q8MHZ5       | cholinergic receptor, nicotinic, beta polypeptide 2 (neuronal) [Mus musculus]                         |
| Q8MMZ8_EIMTE | chembl | Q8MMZ8       | ADP-ribosyltransferase (NAD+, poly (ADP-ribose polymerase)-like 3 [Mus musculus]                      |
|              |        |              | UDP-N-acetylmuramoylalanine-D-glutamyl-lysine-D-alanyl-D-alanine ligase [Streptococcus pneumoniae R6] |
|              |        |              | prostaglandin-endoperoxide synthase 1 [Canis familiaris]                                              |
|              |        |              | Ghrelin/growth hormone secretagogue receptor.                                                         |
|              |        |              | CGMP-dependent protein kinase                                                                         |

|              |        |        |                                                                                                   |
|--------------|--------|--------|---------------------------------------------------------------------------------------------------|
| Q8MTZ4_9TRYP | chembl | Q8MTZ4 | Vacuolar-type proton translocating pyrophosphatase 1                                              |
| Q8QGU2_CHICK | chembl | Q8QGU2 | FK506 binding protein 12.6 [Gallus gallus]                                                        |
| Q8SPQ9_CANFA | chembl | Q8SPQ9 | prostaglandin G/H synthase-2 [Canis familiaris]                                                   |
| Q8ST54_TRYCR | chembl | Q8ST54 | Hexokinase.                                                                                       |
| Q8VBU5_MOUSE | chembl | Q8VBU5 | phosphodiesterase 4B, cAMP specific [Mus musculus]                                                |
| Q8VIE4_RAT   | chembl | Q8VIE4 | phosphodiesterase 7B [Rattus norvegicus]                                                          |
| Q8WMX0_BOVIN | chembl | Q8WMX0 | Muscarinic receptor M1                                                                            |
| Q8WS26_TRYCR | chembl | Q8WS26 | Farnesyl diphosphate synthase precursor.                                                          |
| Q91ZM7_RAT   | chembl | Q91ZM7 | gamma-aminobutyric acid A receptor, theta [Rattus norvegicus]                                     |
| Q94F81_MAIZE | chembl | Q94F81 | HD2 type histone deacetylase HDA106                                                               |
| Q95J97_RABIT | chembl | Q95J97 | PKA catalytic subunit alpha [Oryctolagus cuniculus]                                               |
| Q965D5_PLAFA | chembl | Q965D5 | Enoyl-acyl-carrier protein reductase precursor (EC 1.3.1.9).                                      |
| Q965D7_PLAFA | chembl | Q965D7 | Beta-hydroxyacyl-ACP dehydratase precursor (Fatty acid synthesis protein).                        |
| Q98254_MCV1  | chembl | Q98254 | MC087R [Molluscum contagiosum virus]                                                              |
| Q99MA2_RAT   | chembl | Q99MA2 | X-prolyl aminopeptidase (aminopeptidase P) 2, membrane-bound [Rattus norvegicus]                  |
| Q9BEG3_BOVIN | chembl | Q9BEG3 | 5-lipoxygenase                                                                                    |
| Q9EPR9_RAT   | chembl | Q9EPR9 | phosphodiesterase 1A [Rattus norvegicus]                                                          |
| Q9HUN3_PSEAE | chembl | Q7BME7 | Replicative DNA helicase (Replicative DNA helicase DnaB).                                         |
| Q9I056_PSEAE | chembl | Q9I056 | Carboxypeptidase G2                                                                               |
| Q9JKC1_RAT   | chembl | Q9JKC1 | butyrylcholinesterase [Rattus norvegicus]                                                         |
| Q9JLY8_RAT   | chembl | Q9JLY8 | chemokine (C-C motif) receptor 1                                                                  |
| Q9MYX2_PIG   | chembl | Q9MYX2 | Carnitine palmitoyl transferase I liver isoform                                                   |
| Q9N1N9_HORSE | chembl | Q9N1N9 | Butyrylcholinesterase                                                                             |
| Q9NBA7_PLAFA | chembl | Q9NBA7 | Cysteine protease falcipain-3.                                                                    |
| Q9SEH8_SOYBN | chembl | Q9SEH8 | Mannosyl-oligosaccharide 1,2-alpha-mannosidase                                                    |
| Q9WTR4_RAT   | chembl | Q9WTR4 | solute carrier family 6 member 2 [Rattus norvegicus]                                              |
| Q9ZTP8_MAIZE | chembl | Q9ZTP8 | Histone deacetylase.                                                                              |
| RABP1_MOUSE  | chembl | P62965 | Retinoic acid-binding protein I, cellular (CRABP-I)                                               |
| RABP2_MOUSE  | chembl | P22935 | Retinoic acid-binding protein II, cellular (CRABP-II)                                             |
| RAMP1_HUMAN  | chembl | Q6FGS5 | Receptor activity-modifying protein 1 precursor (CRLR activity- modifying protein 1) (Calcitonin- |



|             |        |        |                                                                                                                                                                                                                                                     |
|-------------|--------|--------|-----------------------------------------------------------------------------------------------------------------------------------------------------------------------------------------------------------------------------------------------------|
| RARA_MOUSE  | chembl | P11416 | receptor-like receptor activity- modifying protein 1).                                                                                                                                                                                              |
| RARB_MOUSE  | chembl | P11417 | Retinoic acid receptor alpha (RAR-alpha)                                                                                                                                                                                                            |
| RARG_MOUSE  | chembl | P18911 | Retinoic acid receptor beta (RAR-beta)                                                                                                                                                                                                              |
| RASH_HUMAN  | chembl | Q9UCE2 | Retinoic acid receptor gamma-A (RAR-gamma-A)                                                                                                                                                                                                        |
| RENI1_MOUSE | chembl | P97911 | Transforming protein p21/H-Ras-1 (c-H-ras)                                                                                                                                                                                                          |
| RENI_RAT    | chembl | Q63497 | Renin 1 precursor (Angiotensinogenase) (Kidney renin)                                                                                                                                                                                               |
| RET_HUMAN   | chembl | P07949 | Renin precursor (Angiotensinogenase)                                                                                                                                                                                                                |
| RIPK2_HUMAN | chembl | Q6UWF0 | Proto-oncogene tyrosine-protein kinase receptor ret precursor (C-ret)                                                                                                                                                                               |
| RIR1_HHV23  | chembl | P09853 | Receptor-interacting serine/threonine-protein kinase 2 (RIP-like interacting CLARP kinase) (Receptor-interacting protein 2) (RIP-2) (CARD-containing interleukin-1 beta converting enzyme associated kinase) (CARD-containing IL-1 beta ICE-kinase) |
| RIR1_HUMAN  | chembl | P23921 | Ribonucleoside-diphosphate reductase large chain (Ribonucleotide reductase) (136 kDa subunit)                                                                                                                                                       |
| RIR2_HHV1K  | chembl | P06474 | Ribonucleoside-diphosphate reductase large subunit (Ribonucleoside-diphosphate reductase M1 subunit) (Ribonucleotide reductase large chain)                                                                                                         |
| RIR2_HHV23  | chembl | P69520 | Ribonucleoside-diphosphate reductase small chain (Ribonucleotide reductase) (38 kDa subunit)                                                                                                                                                        |
| RIR2_HUMAN  | chembl | P31350 | Ribonucleoside-diphosphate reductase small chain (Ribonucleotide reductase) (38 kDa subunit)                                                                                                                                                        |
| ROCK1_HUMAN | chembl | Q59GZ4 | Ribonucleoside-diphosphate reductase M2 chain (Ribonucleotide reductase small chain)                                                                                                                                                                |
| RPC10_HUMAN | chembl | Q96S35 | Rho-associated protein kinase 1 (Rho-associated, coiled-coil containing protein kinase 1) (p160 ROCK-1) (p160ROCK)                                                                                                                                  |
| RPC4_HUMAN  | chembl | Q9BPV7 | DNA-directed RNA polymerases III 12.5 kDa polypeptide (RNA polymerase III C11 subunit) (HsC11p) (hRPC11) (My010 protein)                                                                                                                            |
| RPC6_HUMAN  | chembl | O15319 | DNA-directed RNA polymerase III 47 kDa polypeptide (RNA polymerase C subunit 4) (RPC4) (RPC53) (BN51 protein)                                                                                                                                       |
| RPOB_ECOLI  | chembl | Q2M8S3 | DNA-directed RNA polymerase III 39 kDa polypeptide (RNA polymerase III C39 subunit)                                                                                                                                                                 |
|             |        |        | DNA-directed RNA polymerase beta chain (RNAP beta subunit) (Transcriptase beta chain) (RNA polymerase beta subunit)                                                                                                                                 |

|             |        |        |                                                                                                                                       |
|-------------|--------|--------|---------------------------------------------------------------------------------------------------------------------------------------|
| RPOD_ECOLI  | chembl | Q2M9D8 | RNA polymerase sigma factor rpoD (Sigma-70)                                                                                           |
| RXRA_MOUSE  | chembl | P28700 | Retinoic acid receptor RXR-alpha (Retinoid X receptor alpha)                                                                          |
| RXRA_RAT    | chembl | Q05343 | Retinoic acid receptor RXR-alpha (Retinoid X receptor alpha)                                                                          |
| RXRB_MOUSE  | chembl | P33243 | Retinoic acid receptor RXR-beta (Retinoid X receptor beta) (MHC class I regulatory element binding protein H-2RIIBP)                  |
| RXRB_RAT    | chembl | P49743 | Retinoic acid receptor RXR-beta (Retinoid X receptor beta) (Nuclear receptor coregulator 1)                                           |
| RXRG_MOUSE  | chembl | P28705 | Retinoic acid receptor RXR-gamma (Retinoid X receptor gamma)                                                                          |
| RYR1_HUMAN  | chembl | Q9P1U4 | Ryanodine receptor 1 (Skeletal muscle-type ryanodine receptor) (RyR1) (RYR-1) (Skeletal muscle calcium release channel)               |
| RYR1_RABIT  | chembl | P11716 | Ryanodine receptor 1 (Skeletal muscle-type ryanodine receptor) (RyR1) (RYR-1) (Skeletal muscle calcium release channel)               |
| S27A4_HUMAN | chembl | A8K2F7 | Long-chain fatty acid transport protein 4 (EC 6.2.1.-) (Fatty acid transport protein 4) (FATP-4) (Solute carrier family 27 member 4). |
| S5A1_RAT    | chembl | P24008 | 3-oxo-5-alpha-steroid 4-dehydrogenase 1 (Steroid 5-alpha-reductase 1) (SR type 1)                                                     |
| S5A2_RAT    | chembl | P31214 | 3-oxo-5-alpha-steroid 4-dehydrogenase 2 (Steroid 5-alpha-reductase 2) (SR type 2) (5 alpha-SR2)                                       |
| S6A13_RAT   | chembl | P31646 | Sodium- and chloride-dependent GABA transporter 2                                                                                     |
| SAHH_HUMAN  | chembl | P23526 | Adenosylhomocysteinase (S-adenosyl-L-homocysteine hydrolase) (AdoHcyase)                                                              |
| SAHH_MOUSE  | chembl | P50247 | Adenosylhomocysteinase (S-adenosyl-L-homocysteine hydrolase) (AdoHcyase) (Liver copper binding protein) (CUBP)                        |
| SAHH_RAT    | chembl | P10760 | Adenosylhomocysteinase (S-adenosyl-L-homocysteine hydrolase) (AdoHcyase)                                                              |
| SC5A1_HUMAN | chembl | P13866 | Sodium/glucose cotransporter 1 (Na(+)/glucose cotransporter 1) (High affinity sodium-glucose cotransporter)                           |
| SC5A2_HUMAN | chembl | P31639 | Sodium/glucose cotransporter 2 (Na(+)/glucose cotransporter 2) (Low affinity sodium-glucose cotransporter)                            |

|             |        |        |                                                                                                                                                             |
|-------------|--------|--------|-------------------------------------------------------------------------------------------------------------------------------------------------------------|
| SC5A7_MOUSE | chembl | Q99PK3 | High-affinity choline transporter 1 (Solute carrier family 5 member 7) (Hemicholinium-3-sensitive choline transporter) (CHT)                                |
| SC6A1_HUMAN | chembl | P30531 | Sodium- and chloride-dependent GABA transporter 1                                                                                                           |
| SC6A2_HUMAN | chembl | B2R707 | Sodium-dependent noradrenaline transporter (Norepinephrine transporter) (NET)                                                                               |
| SC6A3_BOVIN | chembl | P27922 | Sodium-dependent dopamine transporter (DA transporter) (DAT)                                                                                                |
| SC6A3_HUMAN | chembl | Q01959 | Sodium-dependent dopamine transporter (DA transporter) (DAT)                                                                                                |
| SC6A3_MACFA | chembl | Q9GJT6 | Sodium-dependent dopamine transporter (DA transporter) (DAT)                                                                                                |
| SC6A3_MOUSE | chembl | Q60719 | Sodium-dependent dopamine transporter (DA transporter) (DAT)                                                                                                |
| SC6A4_MACMU | chembl | Q9MYX0 | Sodium-dependent serotonin transporter (5HT transporter) (5HTT)                                                                                             |
| SC6A4_MOUSE | chembl | O35241 | Sodium-dependent serotonin transporter (5HT transporter) (5HTT)                                                                                             |
| SC6A4_RAT   | chembl | P31652 | Sodium-dependent serotonin transporter (5HT transporter) (5HTT)                                                                                             |
| SC6A9_HUMAN | chembl | Q5TAC0 | Sodium- and chloride-dependent glycine transporter 1 (GlyT1) (GlyT-1) (Solute carrier family 6 member 9)                                                    |
| SC6A9_RAT   | chembl | P28572 | Sodium- and chloride-dependent glycine transporter 1 (GlyT1) (GlyT-1) (Solute carrier family 6 member 9)                                                    |
| SCN1A_HUMAN | chembl | Q96LA3 | Sodium channel protein type I alpha subunit (Voltage-gated sodium channel alpha subunit Nav1.1) (Sodium channel protein, brain I alpha subunit)             |
| SCN1A_RAT   | chembl | P04774 | Sodium channel protein type I alpha subunit (Voltage-gated sodium channel alpha subunit Nav1.1) (Sodium channel protein, brain I alpha subunit)             |
| SCN2A_HUMAN | chembl | A6NC14 | Sodium channel protein type II alpha subunit (Voltage-gated sodium channel alpha subunit Nav1.2) (Sodium channel protein, brain II alpha subunit) (HBSC II) |
| SCN3A_HUMAN | chembl | Q9NY46 | Sodium channel protein type III alpha subunit                                                                                                               |

|             |        |        |                                                                                                                                                                                                                                                                                                                                                 |
|-------------|--------|--------|-------------------------------------------------------------------------------------------------------------------------------------------------------------------------------------------------------------------------------------------------------------------------------------------------------------------------------------------------|
| SCN3A_RAT   | chembl | P08104 | (Voltage-gated sodium channel alpha subunit Nav1.3) (Sodium channel protein, brain III alpha subunit) (Voltage-gated sodium channel subtype III) Sodium channel protein type III alpha subunit (Voltage-gated sodium channel alpha subunit Nav1.3) (Sodium channel protein, brain III alpha subunit) (Voltage-gated sodium channel subtype III) |
| SCN4A_HUMAN | chembl | P35499 | Sodium channel protein type IV alpha subunit (Voltage-gated sodium channel alpha subunit Nav1.4) (Sodium channel protein, skeletal muscle alpha-subunit)                                                                                                                                                                                        |
| SCN5A_HUMAN | chembl | Q75RX9 | Sodium channel protein type V alpha subunit (Voltage-gated sodium channel alpha subunit Nav1.5) (Sodium channel protein, cardiac muscle alpha-subunit) (HH1)                                                                                                                                                                                    |
| SCN5A_RAT   | chembl | Q925G6 | Sodium channel protein type V alpha subunit (Voltage-gated sodium channel alpha subunit Nav1.5) (Sodium channel protein, cardiac muscle alpha-subunit)                                                                                                                                                                                          |
| SCN7A_HUMAN | chembl | Q01118 | Sodium channel protein type VII alpha subunit (Putative voltage-gated sodium channel alpha subunit Nax) (Sodium channel protein, cardiac and skeletal muscle alpha-subunit)                                                                                                                                                                     |
| SCN8A_HUMAN | chembl | Q9UQD0 | Sodium channel protein type VIII alpha subunit (Voltage-gated sodium channel alpha subunit Nav1.6)                                                                                                                                                                                                                                              |
| SCN9A_HUMAN | chembl | Q70HX2 | Sodium channel protein type IX alpha subunit (Voltage-gated sodium channel alpha subunit Nav1.7) (Neuroendocrine sodium channel) (hNE-Na) (Peripheral sodium channel 1)                                                                                                                                                                         |
| SCNAA_HUMAN | chembl | Q9Y5Y9 | Sodium channel protein type X alpha subunit (Voltage-gated sodium channel alpha subunit Nav1.8) (Peripheral nerve sodium channel 3) (hPN3)                                                                                                                                                                                                      |
| SCNNA_HUMAN | chembl | A5X2U9 | Amiloride-sensitive sodium channel alpha-subunit (Epithelial Na <sup>+</sup> channel alpha subunit) (Alpha ENaC) (Nonvoltage-gated sodium channel 1 alpha subunit) (SCNEA) (Alpha NaCH)                                                                                                                                                         |
| SCYD_MAGGR  | chembl | A4QTI6 | Scytalone dehydratase                                                                                                                                                                                                                                                                                                                           |
| SEPR_HUMAN  | chembl | Q99998 | Seprase (Fibroblast activation protein alpha)                                                                                                                                                                                                                                                                                                   |

|             |        |        |                                                                                                                                                                                                                             |
|-------------|--------|--------|-----------------------------------------------------------------------------------------------------------------------------------------------------------------------------------------------------------------------------|
| SIRT2_HUMAN | chembl | Q924Y7 | (Integral membrane serine protease) (170-kDa melanoma membrane-bound gelatinase) NAD-dependent deacetylase sirtuin-2 (EC 3.5.1.-) (SIR2-like) (SIR2- like protein 2).                                                       |
| SL9A1_RAT   | chembl | P26431 | Sodium/hydrogen exchanger 1 (Na(+)/H(+) exchanger 1) (NHE-1)                                                                                                                                                                |
| SL9A2_RABIT | chembl | P50482 | Sodium/hydrogen exchanger 2 (Na(+)/H(+) exchanger 2) (NHE-2)                                                                                                                                                                |
| SL9A3_RABIT | chembl | P26432 | Sodium/hydrogen exchanger 3 (Na(+)/H(+) exchanger 3) (NHE-3)                                                                                                                                                                |
| SLK_HUMAN   | chembl | Q9NQL0 | STE20-like serine/threonine-protein kinase (EC 2.7.11.1) (STE20-like kinase) (STE20-related serine/threonine-protein kinase) (STE20-related kinase) (hSLK) (Serine/threonine-protein kinase 2) (CTCL tumor antigen se20-9). |
| SMT1_ARATH  | chembl | Q8LKW1 | sterol 24-C-methyltransferase, putative [Arabidopsis thaliana]                                                                                                                                                              |
| SOAT1_HUMAN | chembl | P35610 | Sterol O-acyltransferase 1 (Cholesterol acyltransferase 1) (Acyl coenzyme A:cholesterol acyltransferase 1) (ACAT-1)                                                                                                         |
| SOAT1_MOUSE | chembl | Q61263 | Sterol O-acyltransferase 1 (Cholesterol acyltransferase 1) (Acyl coenzyme A:cholesterol acyltransferase 1) (ACAT-1)                                                                                                         |
| SOAT1_RAT   | chembl | O70536 | Sterol O-acyltransferase 1 (Cholesterol acyltransferase 1) (Acyl coenzyme A:cholesterol acyltransferase 1) (ACAT-1)                                                                                                         |
| SOAT2_HUMAN | chembl | Q4VB99 | Sterol O-acyltransferase 2 (Cholesterol acyltransferase 2) (Acyl coenzyme A:cholesterol acyltransferase 2) (ACAT-2)                                                                                                         |
| SOAT2_MOUSE | chembl | O88908 | Sterol O-acyltransferase 2 (Cholesterol acyltransferase 2) (Acyl coenzyme A:cholesterol acyltransferase 2) (ACAT-2)                                                                                                         |
| SOAT2_RAT   | chembl | Q7TQM4 | sterol O-acyltransferase 2 [Rattus norvegicus]                                                                                                                                                                              |
| SORT_HUMAN  | chembl | C0JYZ0 | Sortilin precursor (Glycoprotein 95) (Gp95) (Neurotensin receptor 3) (NT3) (100 kDa NT receptor)                                                                                                                            |
| SP0F_BACSU  | chembl | P06628 | Sporulation initiation phosphotransferase F (Stage 0 sporulation protein F)                                                                                                                                                 |
| SRC_CHICK   | chembl | P00523 | Proto-oncogene tyrosine-protein kinase Src (p60-Src) (c-Src)                                                                                                                                                                |

|             |        |        |                                                                                                                                                                   |
|-------------|--------|--------|-------------------------------------------------------------------------------------------------------------------------------------------------------------------|
| SRC_HUMAN   | chembl | P12931 | Proto-oncogene tyrosine-protein kinase Src (p60-Src) (c-Src)                                                                                                      |
| SRC_RAT     | chembl | Q9WUD9 | Proto-oncogene tyrosine-protein kinase SRC (p60-SRC) (C-SRC)                                                                                                      |
| SSR1_MOUSE  | chembl | P30873 | Somatostatin receptor type 1 (SS1R) (SRIF-2)                                                                                                                      |
| SSR1_RAT    | chembl | P28646 | Somatostatin receptor type 1 (SS1R) (SRIF-2)                                                                                                                      |
| SSR2_RAT    | chembl | P30680 | Somatostatin receptor type 2 (SS2R) (SRIF-1)                                                                                                                      |
| SSR3_MOUSE  | chembl | P30935 | Somatostatin receptor type 3 (SS3R) (SSR-28)                                                                                                                      |
| SSR3_RAT    | chembl | P30936 | Somatostatin receptor type 3 (SS3R) (SSR-28)                                                                                                                      |
| SSR4_MOUSE  | chembl | P49660 | Somatostatin receptor type 4 (SS4R)                                                                                                                               |
| SSR4_RAT    | chembl | P30937 | Somatostatin receptor type 4 (SS4R)                                                                                                                               |
| SSR5_MOUSE  | chembl | O08998 | Somatostatin receptor type 5 (SS5R)                                                                                                                               |
| SSR5_RAT    | chembl | P30938 | Somatostatin receptor type 5 (SS5R)                                                                                                                               |
| ST17A_HUMAN | chembl | A4D1V6 | Serine/threonine-protein kinase 17A (EC 2.7.11.1) (DAP kinase-related apoptosis-inducing protein kinase 1).                                                       |
| ST17B_HUMAN | chembl | O94768 | Serine/threonine-protein kinase 17B (EC 2.7.11.1) (DAP kinase-related apoptosis-inducing protein kinase 2).                                                       |
| STAT3_HUMAN | chembl | P40763 | Signal transducer and activator of transcription 3 (Acute-phase response factor)                                                                                  |
| STF1_HUMAN  | chembl | Q13285 | Steroidogenic factor 1 (STF-1) (SF-1) (Adrenal 4-binding protein) (Steroid hormone receptor Ad4BP) (Fushi tarazu factor homolog 1).                               |
| STK10_HUMAN | chembl | Q9UIW4 | Serine/threonine-protein kinase 10 (EC 2.7.11.1) (Lymphocyte-oriented kinase).                                                                                    |
| STK36_HUMAN | chembl | Q9NRP7 | Serine/threonine-protein kinase 36 (EC 2.7.11.1) (Fused homolog).                                                                                                 |
| STK3_MOUSE  | chembl | Q9JI10 | Serine/threonine-protein kinase 3 (EC 2.7.11.1) (STE20-like kinase MST2) (MST-2) (Mammalian STE20-like protein kinase 2).                                         |
| STK4_HUMAN  | chembl | Q9NTZ4 | Serine/threonine-protein kinase 4 (EC 2.7.11.1) (STE20-like kinase MST1) (MST-1) (Mammalian STE20-like protein kinase 1) (Serine/threonine-protein kinase Krs-2). |
| SUIS_HUMAN  | chembl | Q1JQ80 | Sucrase-isomaltase, intestinal [Contains: (Sucrase) ] [Contains: (Isomaltase) ]                                                                                   |
| SYFA_STAAU  | chembl | P68849 | Phenylalanyl-tRNA synthetase alpha chain (Phenylalanine--tRNA ligase alpha chain) (PheRS)                                                                         |

|             |        |        |                                                                                                                             |
|-------------|--------|--------|-----------------------------------------------------------------------------------------------------------------------------|
| SYFA_STRP8  | chembl | Q8P1K1 | Phenylalanyl-tRNA synthetase alpha chain (Phenylalanine--tRNA ligase alpha chain) (PheRS)                                   |
| SYFM_HUMAN  | chembl | B2R664 | Phenylalanyl-tRNA synthetase, mitochondrial precursor (Phenylalanine--tRNA ligase) (PheRS) (HSPC320)                        |
| SYIC_HUMAN  | chembl | A8KAE9 | Isoleucyl-tRNA synthetase, cytoplasmic (Isoleucine--tRNA ligase) (IleRS) (IRS)                                              |
| SYLC_HUMAN  | chembl | Q9NSE1 | Leucyl-tRNA synthetase, cytoplasmic (Leucine--tRNA ligase) (LeuRS)                                                          |
| SYMC_HUMAN  | chembl | Q96A15 | Methionyl-tRNA synthetase (Methionine--tRNA ligase) (MetRS)                                                                 |
| SYM_STAAW   | chembl | Q8NY00 | Methionyl-tRNA synthetase (Methionine--tRNA ligase) (MetRS)                                                                 |
| SYPC_CANAL  | chembl | P78600 | Prolyl-tRNA synthetase, cytoplasmic (Proline--tRNA ligase) (ProRS)                                                          |
| SYYC_HUMAN  | chembl | Q53EN1 | Tyrosyl-tRNA synthetase, cytoplasmic (Tyrosyl--tRNA ligase) (TyrRS)                                                         |
| T23O_RAT    | chembl | P21643 | Tryptophan 2,3-dioxygenase (Tryptophan pyrrolase) (Tryptophanase) (Tryptophan oxygenase) (Tryptamin 2,3-dioxygenase) (TRPO) |
| TA2R_RAT    | chembl | P34978 | Thromboxane A2 receptor (TXA2-R) (Prostanoid TP receptor) (TXR2)                                                            |
| TARB1_HUMAN | chembl | Q13395 | TAR RNA binding protein 1 [Homo sapiens]                                                                                    |
| TAT_HV112   | chembl | P04326 | TAT protein (Transactivating regulatory protein)                                                                            |
| TBA1A_PIG   | chembl | P02550 | Tubulin alpha chain                                                                                                         |
| TBA1A_RAT   | chembl | P68370 | Tubulin alpha-1 chain (Alpha-tubulin 1)                                                                                     |
| TBA4A_HUMAN | chembl | P68366 | Tubulin alpha-1 chain (Alpha-tubulin 1) (Testis-specific alpha-tubulin) (Tubulin H2-alpha)                                  |
| TBB1_HUMAN  | chembl | Q9H4B7 | Tubulin beta-1 chain                                                                                                        |
| TBB2B_BOVIN | chembl | Q6B856 | tubulin, beta polypeptide [Bos taurus]                                                                                      |
| TBB2C_HUMAN | chembl | A2BFA2 | Tubulin beta-2 chain                                                                                                        |
| TBB3_HUMAN  | chembl | Q13509 | Tubulin beta-3 chain (Tubulin beta-III) (Tubulin beta-4)                                                                    |
| TBB4_HUMAN  | chembl | Q969E5 | Tubulin beta-4 chain (Tubulin 5 beta) (Tubulin beta-4)                                                                      |
| TBB5_HUMAN  | chembl | P07437 | Tubulin beta-2 chain (OK/SW-cl.56)                                                                                          |
| TBB8_HUMAN  | chembl | Q8WZ78 | tubulin, beta 8 [Homo sapiens]                                                                                              |
| TBB_PIG     | chembl | P02554 | Tubulin beta chain                                                                                                          |
| TETX_CLOTE  | chembl | P04958 | Tetanus toxin precursor (Tentoxylisin) [Contains:                                                                           |

|             |        |        |                                                                                                                                                                                               |
|-------------|--------|--------|-----------------------------------------------------------------------------------------------------------------------------------------------------------------------------------------------|
| TF65_HUMAN  | chembl | Q6GTV1 | (Tetanus toxin light chain) (Tetanus toxin chain L) ]<br>[Contains: (Tetanus toxin heavy chain) (Tetanus toxin chain H) ]<br>Transcription factor p65 (Nuclear factor NF-kappa-B p65 subunit) |
| TF_HUMAN    | chembl | P13726 | Tissue factor precursor (TF) (Coagulation factor III) (Thromboplastin) (CD142 antigen)                                                                                                        |
| TGFR1_HUMAN | chembl | P36897 | TGF-beta receptor type I precursor (TGFR-1) (TGF-beta type I receptor) (Serine/threonine-protein kinase receptor R4) (SKR4) (Activin receptor-like kinase 5) (ALK-5)                          |
| TGFR2_HUMAN | chembl | Q99474 | TGF-beta receptor type II precursor (TGFR-2) (TGF-beta type II receptor)                                                                                                                      |
| TGM2_HUMAN  | chembl | P21980 | Protein-glutamine gamma-glutamyltransferase (Tissue transglutaminase) (TGase C) (TGC) (TG(C)) (Transglutaminase 2) (TGase-H)                                                                  |
| TGT_ZYMMO   | chembl | P28720 | Queuine tRNA-ribosyltransferase (tRNA-guanine transglycosylase) (Guanine insertion enzyme)                                                                                                    |
| THAS_RAT    | chembl | P49430 | Thromboxane-A synthase (TXA synthase) (TXS)                                                                                                                                                   |
| THA_HUMAN   | chembl | Q8N6A1 | Thyroid hormone receptor alpha (C-erbA-alpha) (c-erbA-1) (EAR-7) (EAR7)                                                                                                                       |
| THA_RAT     | chembl | Q99146 | Thyroid hormone receptor alpha (C-erbA-alpha) (c-erbA-1)                                                                                                                                      |
| THIL_HUMAN  | chembl | B2R6H1 | Acetyl-CoA acetyltransferase, mitochondrial precursor (Acetoacetyl-CoA thiolase) (T2)                                                                                                         |
| THIL_RAT    | chembl | P17764 | Acetyl-CoA acetyltransferase, mitochondrial precursor (Acetoacetyl-CoA thiolase)                                                                                                              |
| THRB_BOVIN  | chembl | P00735 | Prothrombin precursor                                                                                                                                                                         |
| THRB_RAT    | chembl | P18292 | Prothrombin precursor                                                                                                                                                                         |
| TIMP3_RAT   | chembl | P48032 | Metalloproteinase inhibitor 3 precursor (TIMP-3) (Tissue inhibitor of metalloproteinases-3)                                                                                                   |
| TKT_HUMAN   | chembl | Q96HH3 | Transketolase (TK)                                                                                                                                                                            |
| TNFA_HUMAN  | chembl | O43647 | Tumor necrosis factor precursor (TNF-alpha) (Tumor necrosis factor ligand superfamily member 2) (TNF-a) (Cachectin)                                                                           |
| TNIK_HUMAN  | chembl | Q9UKD8 | TRAF2 and NCK-interacting kinase (EC 2.7.11.1).                                                                                                                                               |
| TOP1_HUMAN  | chembl | Q9UJN0 | DNA topoisomerase I                                                                                                                                                                           |
| TOP2A_HUMAN | chembl | Q71UQ5 | DNA topoisomerase II, alpha isozyme                                                                                                                                                           |
| TOP2B_HUMAN | chembl | Q9UMG8 | DNA topoisomerase II, beta isozyme                                                                                                                                                            |
| TOP3_BACSU  | chembl | P96583 | DNA topoisomerase III [Bacillus subtilis subsp.                                                                                                                                               |



|             |        |            |                                                                                                                                                                                                |
|-------------|--------|------------|------------------------------------------------------------------------------------------------------------------------------------------------------------------------------------------------|
| TP4A3_HUMAN | chembl | Q9BTW5     | subtilis str. 168]<br>Protein tyrosine phosphatase type IVA protein 3 (EC 3.1.3.48) (Protein-tyrosine phosphatase 4a3) (Protein-tyrosine phosphatase of regenerating liver 3) (PRL-3) (PRL-R). |
| TRBP2_HUMAN | chembl | Q12878     | TAR RNA-binding protein 2 (Trans-activation responsive RNA-binding protein)                                                                                                                    |
| TRFR_HUMAN  | chembl | P34981     | Thyrotropin-releasing hormone receptor (TRH-R) (Thyroliberin receptor)                                                                                                                         |
| TRPV1_HUMAN | chembl | Q9H0G9     | transient receptor potential cation channel, subfamily V, member 1 [Homo sapiens]                                                                                                              |
| TRPV2_RAT   | chembl | Q9WUD2     | vanilloid receptor-like protein 1 [Rattus norvegicus]                                                                                                                                          |
| TRPV4_RAT   | chembl | Q9ERZ8     | transient receptor potential cation channel, subfamily V, member 4 [Rattus norvegicus]                                                                                                         |
| TRXR1_HUMAN | chembl | Q16881     | Thioredoxin reductase 1, cytoplasmic precursor (TR) (TR1)                                                                                                                                      |
| TRXR2_HUMAN | chembl | Q9NNW7     | Thioredoxin reductase 2, mitochondrial precursor (TR3) (TR-beta) (Selenoprotein Z) (SelZ)                                                                                                      |
| TRXR_PLAF7  | chembl | TRXR_PLAF7 | Thioredoxin reductase (EC 1.8.1.9) (TrxR).                                                                                                                                                     |
| TRY1_HUMAN  | chembl | Q7M4N4     | Trypsin I precursor (Cationic trypsinogen)                                                                                                                                                     |
| TRY2_BOVIN  | chembl | Q29463     | Anionic trypsin precursor                                                                                                                                                                      |
| TRY2_HUMAN  | chembl | P07478     | Trypsin II precursor (Anionic trypsinogen)                                                                                                                                                     |
| TRY2_RAT    | chembl | P00763     | Anionic trypsin II precursor (Pretrypsinogen II)                                                                                                                                               |
| TRY3_HUMAN  | chembl | A9Z1Y4     | Trypsin III precursor (Brain trypsinogen) (Mesotrypsinogen) (Trypsin IV)                                                                                                                       |
| TRYB1_HUMAN | chembl | Q15661     | Tryptase beta-1 precursor (Tryptase 1) (Tryptase I)                                                                                                                                            |
| TRYB2_HUMAN | chembl | P20231     | Tryptase beta-2 precursor (Tryptase 2) (Tryptase II)                                                                                                                                           |
| TRYD_HUMAN  | chembl | Q96RZ5     | Tryptase delta precursor (Delta tryptase) (Mast cell mMCP-7-like) (HmMCP-3-like tryptase III)                                                                                                  |
| TRYG1_HUMAN | chembl | Q9UBB2     | Tryptase gamma precursor (Transmembrane tryptase)                                                                                                                                              |
| TRYP_PIG    | chembl | P00761     | Trypsin precursor                                                                                                                                                                              |
| TSPOB_HUMAN | chembl | B1AH88     | peripheral benzodiazapine receptor isoform PBR-S [Homo sapiens]                                                                                                                                |
| TSPO_BOVIN  | chembl | P30535     | Peripheral-type benzodiazepine receptor (PBR) (PKBS) (Isoquinoline-binding protein) (IBP)                                                                                                      |
| TTK_HUMAN   | chembl | P33981     | Dual specificity protein kinase TTK (EC 2.7.12.1) (Phosphotyrosine picked threonine-protein kinase) (PYT).                                                                                     |

|             |        |            |                                                                                                                                            |
|-------------|--------|------------|--------------------------------------------------------------------------------------------------------------------------------------------|
| TXK_HUMAN   | chembl | Q14220     | Tyrosine-protein kinase TXK (EC 2.7.10.2).                                                                                                 |
| TYPH_ECOLI  | chembl | P07650     | Thymidine phosphorylase (TdRPase)                                                                                                          |
| TYRO_AGABI  | chembl | O42713     | Tyrosinase (EC 1.14.18.1) (Monophenol monooxygenase) (Phenolase) (Monophenol oxidase) (Cresolase).                                         |
| TYSY_CRYNE  | chembl | P45351     | Thymidylate synthase (EC 2.1.1.45) (TS) (TSase).                                                                                           |
| TYSY_ECOLI  | chembl | Q2MA10     | Thymidylate synthase (TS) (TSase)                                                                                                          |
| TYSY_HUMAN  | chembl | P04818     | Thymidylate synthase (TS) (TSase) (OK/SW-cl.29)                                                                                            |
| TYSY_MOUSE  | chembl | P07607     | Thymidylate synthase (TS) (TSase)                                                                                                          |
| TYTR_TRYBB  | chembl | P39051     | Trypanothione reductase (TR) (N(1),N(8)-bis(glutathionyl)spermidine reductase)                                                             |
| UD2B7_HUMAN | chembl | Q6GTW0     | UDP-glucuronosyltransferase 2B7 precursor (EC 2.4.1.17) (UDPGT) (3,4- catechol estrogen specific) (UDPGTh-2).                              |
| UL52_HHV11  | chembl | UL52_HHV11 | DNA helicase/primase complex protein (DNA replication protein UL52)                                                                        |
| ULK3_MOUSE  | chembl | Q9DBR8     | PREDICTED: unc-51-like kinase 3 isoform 1 [Mus musculus]                                                                                   |
| UPP2_MOUSE  | chembl | Q8CGR7     | Uridine phosphorylase 2 (UrdPase 2) (UPase 2) (Liver-specific uridine phosphorylase) (L-UrdPase)                                           |
| UR2R_HUMAN  | chembl | B2RMV8     | Urotensin II receptor (UR-II-R) (G protein coupled receptor 14)                                                                            |
| V1AR_HUMAN  | chembl | P37288     | Vasopressin V1a receptor (V1aR) (Vascular/hepatic-type arginine vasopressin receptor) (Antidiuretic hormone receptor 1a) (AVPR V1a)        |
| V1BR_RAT    | chembl | P48974     | Vasopressin V1b receptor (V1bR) (AVPR V1b) (Vasopressin V3 receptor) (AVPR V3) (Antidiuretic hormone receptor 1b)                          |
| V2R_HUMAN   | chembl | P30518     | Vasopressin V2 receptor (Renal-type arginine vasopressin receptor) (Antidiuretic hormone receptor) (AVPR V2)                               |
| V2R_PIG     | chembl | P32307     | Vasopressin V2 receptor (Renal-type arginine vasopressin receptor) (Antidiuretic hormone receptor) (AVPR V2)                               |
| VACHT_HUMAN | chembl | Q16572     | Vesicular acetylcholine transporter (VAChT) (Solute carrier family 18 member 3)                                                            |
| VATB1_HUMAN | chembl | Q6P4H6     | Vacuolar ATP synthase subunit B, kidney isoform (V-ATPase B1 subunit) (Vacuolar proton pump B isoform 1) (Endomembrane proton pump 58 kDa) |

|              |        |              |                                                                                                                                                                                  |
|--------------|--------|--------------|----------------------------------------------------------------------------------------------------------------------------------------------------------------------------------|
| VDR_CHICK    | chembl | O42392       | subunit)<br>Vitamin D3 receptor (VDR) (1,25-dihydroxyvitamin D3 receptor)                                                                                                        |
| VE1_HP11     | chembl | P04014       | Replication protein E1                                                                                                                                                           |
| VE2_HP16     | chembl | Q71B14       | Regulatory protein E2                                                                                                                                                            |
| VGFR2_MOUSE  | chembl | P35918       | Vascular endothelial growth factor receptor 2 precursor (VEGFR-2) (Protein-tyrosine kinase receptor flk-1) (Fetal liver kinase 1) (Kinase NYK)                                   |
| VGFR3_HUMAN  | chembl | P35916       | Vascular endothelial growth factor receptor 3 precursor (VEGFR-3) (Tyrosine-protein kinase receptor FLT4)                                                                        |
| VGFR3_MOUSE  | chembl | P35917       | Vascular endothelial growth factor receptor 3 precursor (VEGFR-3) (Tyrosine-protein kinase receptor FLT4)                                                                        |
| VMAT2_BOVIN  | chembl | Q27963       | Synaptic vesicular amine transporter (Monoamine transporter) (Vesicular amine transporter 2) (VAT2) (Solute carrier family 18 member 2)                                          |
| VPP1_CHICK   | chembl | Q9I8D0       | vacuolar H(+)-transporting ATPase 116 kDa subunit, a1 isoform [Gallus gallus]                                                                                                    |
| WEE1_HUMAN   | chembl | P30291       | Wee1-like protein kinase (WEE1hu)                                                                                                                                                |
| XDH_BOVIN    | chembl | Q95325       | Xanthine dehydrogenase/oxidase (Xanthine dehydrogenase) (XD) (Xanthine oxidase) (XO) (Xanthine oxidoreductase)                                                                   |
| XDH_HUMAN    | chembl | Q4PJ16       | Xanthine dehydrogenase/oxidase (Xanthine dehydrogenase) (XD) (Xanthine oxidase) (XO) (Xanthine oxidoreductase)                                                                   |
| XPP1_HUMAN   | chembl | O15250       | X-prolyl aminopeptidase (aminopeptidase P) 1, soluble [Homo sapiens]                                                                                                             |
| XPP2_HUMAN   | chembl | A0AV16       | Xaa-Pro aminopeptidase 2 precursor (X-Pro aminopeptidase 2) (Membrane-bound aminopeptidase P) (Membrane-bound APP) (Membrane-bound AmP) (mAmP) (Aminoacylproline aminopeptidase) |
| YES_HUMAN    | chembl | A6NLB3       | Proto-oncogene tyrosine-protein kinase YES (p61-YES) (C-YES)                                                                                                                     |
| _3clpro_sars | chembl | _3clpro_sars | nsp5-pp1a/pp1ab (3CL-PRO) [SARS coronavirus]                                                                                                                                     |
| _ACE2_RAT    | chembl | _ACE2_RAT    | similar to anigotensin-converting enzyme-related carboxypeptidase [Rattus norvegicus]                                                                                            |
| _ADCY9_RAT   | chembl | _ADCY9_RAT   | similar to adenylyl cyclase type 9 [Rattus norvegicus]                                                                                                                           |

|               |        |               |                                                                                                                                                                                |
|---------------|--------|---------------|--------------------------------------------------------------------------------------------------------------------------------------------------------------------------------|
| _B1WC34_RAT   | chembl | _B1WC34_RAT   | similar to alpha glucosidase II, beta subunit [Rattus norvegicus]                                                                                                              |
| _CA2D4_HUMAN  | chembl | _CA2D4_HUMAN  | voltage-gated calcium channel alpha(2)delta-4 subunit isoform 2 [Homo sapiens]                                                                                                 |
| _GRINA_HUMAN  | chembl | _GRINA_HUMAN  | PREDICTED: NMDA receptor glutamate-binding chain [Homo sapiens]                                                                                                                |
| _GRINA_RAT    | chembl | _GRINA_RAT    | glutamate receptor, ionotropic, N-methyl D-aspartate-associated protein 1 (glutamate binding) [Rattus norvegicus]                                                              |
| _HDAC1_RAT    | chembl | _HDAC1_RAT    | histone deacetylase 1 [Rattus norvegicus]                                                                                                                                      |
| _HDAC7_RAT    | chembl | _HDAC7_RAT    | histone deacetylase 7 [Rattus norvegicus]                                                                                                                                      |
| _KPCT_RAT     | chembl | _KPCT_RAT     | protein kinase C, theta [Rattus norvegicus]                                                                                                                                    |
| _MAGI3_HUMAN  | chembl | _MAGI3_HUMAN  | membrane-associated guanylate kinase-related 3 [Homo sapiens]                                                                                                                  |
| _PA2GC_HUMAN  | chembl | _PA2GC_HUMAN  | PREDICTED: similar to Group IIC secretory phospholipase A2 precursor (Phosphatidylcholine 2-acylhydrolase GIIC) (GIIC sPLA2) (PLA2-8) (14 kDa phospholipase A2) [Homo sapiens] |
| _PDE4C_MOUSE  | chembl | _PDE4C_MOUSE  | phosphodiesterase 4C, cAMP specific [Mus musculus]                                                                                                                             |
| _PNPH_RAT     | chembl | _PNPH_RAT     | similar to purine-nucleoside phosphorylase, purine-nucleoside phosphorylase [Rattus norvegicus]                                                                                |
| _POLG_HCVH    | chembl | _POLG_HCVH    | polyprotein [Hepatitis C virus]                                                                                                                                                |
| _Q3TRP4_MOUSE | chembl | _Q3TRP4_MOUSE | similar to ionotropic glutamate receptor [Mus musculus]                                                                                                                        |
| _Q5RJZ2_RAT   | chembl | _Q5RJZ2_RAT   | histone deacetylase 5 [Rattus norvegicus]                                                                                                                                      |
| _Q8I6U4_PLAF7 | chembl | _Q8I6U4_PLAF7 | falcipain 2 precursor [Plasmodium falciparum 3D7]                                                                                                                              |
| _Q8IHP6_PLAF7 | chembl | _Q8IHP6_PLAF7 | farnesyltransferase beta subunit, putative [Plasmodium falciparum 3D7]                                                                                                         |
| _Q8II79_PLAF7 | chembl | _Q8II79_PLAF7 | farnesyl pyrophosphate synthase, putative [Plasmodium falciparum 3D7]                                                                                                          |
| _Q8II92_PLAF7 | chembl | _Q8II92_PLAF7 | deoxyuridine 5-triphosphate nucleotidohydrolase, putative [Plasmodium falciparum 3D7]                                                                                          |
| _Q99P97_RAT   | chembl | _Q99P97_RAT   | histone deacetylase 6 [Rattus norvegicus]                                                                                                                                      |
| _Q99PA1_RAT   | chembl | _Q99PA1_RAT   | histone deacetylase 2 [Rattus norvegicus]                                                                                                                                      |
| _Q9LGC6_ORYSJ | chembl | _Q9LGC6_ORYSJ | putative alpha-glucosidase [Oryza sativa (japonica cultivar-group)]                                                                                                            |
| _Q9QZG8_RAT   | chembl | _Q9QZG8_RAT   | similar to adenylyl cyclase type VII [Rattus norvegicus]                                                                                                                       |
| _RABP1_CHICK  | chembl | _RABP1_CHICK  | PREDICTED: similar to Retinoic acid-binding                                                                                                                                    |

|                |        |                |                                                                                                                                                                                         |
|----------------|--------|----------------|-----------------------------------------------------------------------------------------------------------------------------------------------------------------------------------------|
| _RXRG_RAT      | chembl | _RXRG_RAT      | protein I, cellular (CRABP-I) [Gallus gallus]                                                                                                                                           |
| _TRXR3_HUMAN   | chembl | _TRXR3_HUMAN   | retinoid X receptor gamma [Rattus norvegicus]                                                                                                                                           |
|                |        |                | PREDICTED: thioredoxin reductase 3 [Homo sapiens]                                                                                                                                       |
| _adcyl1_rat    | chembl | _adcyl1_rat    | similar to brain adenylate cyclase 1, adenylyl cyclase, ATP pyrophosphate-lyase, 3,5-cyclic AMP synthetase, adenylate cyclase type I, brain type I adenylyl cyclase [Rattus norvegicus] |
|                |        |                | AF2 neuropeptide receptor                                                                                                                                                               |
| _af2_nprec     | chembl | _af2_nprec     | Calf thymus DNA                                                                                                                                                                         |
| _clfthym_DNA   | chembl | _clfthym_DNA   | F1F0-ATPase                                                                                                                                                                             |
| _f1f0_bovine   | chembl | _f1f0_bovine   | PREDICTED: similar to fucosidase, alpha-L- 2, plasma, partial [Bos taurus]                                                                                                              |
| _fuca2_bovin   | chembl | _fuca2_bovin   | similar to alpha glucosidase II, alpha subunit [Rattus norvegicus]                                                                                                                      |
| _ganab_rat     | chembl | _ganab_rat     | integrase [Human immunodeficiency virus 1]                                                                                                                                              |
|                |        |                | mAb 3E7                                                                                                                                                                                 |
| _integr_hiv1   | chembl | _integr_hiv1   | Mitochondrial complex I                                                                                                                                                                 |
| _mab_3e7       | chembl | _mab_3e7       | Mitochondrial complex 3                                                                                                                                                                 |
| _mito_cplx1    | chembl | _mito_cplx1    | NS3 protein [Dengue virus type 2]                                                                                                                                                       |
| _mito_cplx3    | chembl | _mito_cplx3    | NS3 protease/helicase [Hepatitis C virus]                                                                                                                                               |
| _ns3_denguev   | chembl | _ns3_denguev   | NS4A protein [Hepatitis C virus]                                                                                                                                                        |
| _ns3_hepcv     | chembl | _ns3_hepcv     | NS5B RNA-dependent RNA polymerase [Hepatitis C virus]                                                                                                                                   |
| _ns4a_hepcv    | chembl | _ns4a_hepcv    | NUCLEIC-ACID                                                                                                                                                                            |
| _ns5b_hepcv    | chembl | _ns5b_hepcv    | P3 purinoceptor                                                                                                                                                                         |
|                |        |                | PREDICTED: similar to cGMP-inhibited 3,5-cyclic phosphodiesterase B (Cyclic GMP inhibited phosphodiesterase B) (CGI-PDE B) (CGIPDE1) (CGIP1) [Bos taurus]                               |
| _nucl_acid     | chembl | _nucl_acid     | polyprotein [Human rhinovirus B]                                                                                                                                                        |
| _p3purino      | chembl | _p3purino      | proteinase/capsid scaffold protein [Human herpesvirus 4]                                                                                                                                |
| _pde3b_bovin   | chembl | _pde3b_bovin   | protease [Human rhinovirus A]                                                                                                                                                           |
|                |        |                | 3C (protease) [Human rhinovirus B]                                                                                                                                                      |
| _poly_hrvb     | chembl | _poly_hrvb     | Proteasome                                                                                                                                                                              |
| _protcap_hhv4  | chembl | _protcap_hhv4  | retinoic acid receptor, beta [Rattus norvegicus]                                                                                                                                        |
|                |        |                | reverse transcriptase [Human immunodeficiency virus 1]                                                                                                                                  |
| _protease_hrva | chembl | _protease_hrva |                                                                                                                                                                                         |
| _protease_hrvb | chembl | _protease_hrvb |                                                                                                                                                                                         |
| _proteasome    | chembl | _proteasome    |                                                                                                                                                                                         |
| _rarb_rat      | chembl | _rarb_rat      |                                                                                                                                                                                         |
| _revtr_hiv1    | chembl | _revtr_hiv1    |                                                                                                                                                                                         |

|                     |        |            |                                                                                     |
|---------------------|--------|------------|-------------------------------------------------------------------------------------|
| _rib_rna            | chembl | _rib_rna   | Ribosomal RNA A-site                                                                |
| _sigma2             | chembl | _sigma2    | Sigma 2 receptor                                                                    |
| (24)SMT             | wombat | (ommitted) | delta(24)-sterol-C-methyltransferase [-]                                            |
| (24)SR              | wombat |            | delta(24)-sterol-reductase [-]                                                      |
| 12-LOX              | wombat | (ommitted) | arachidonate 12-lipoxygenase [-]                                                    |
| 20S proteasome      | wombat |            | threonine protease [-]                                                              |
| 5alpha-R            | wombat |            | 3-oxo-5-alpha-steroid 4-dehydrogenase [-]                                           |
| 5-HT1               | wombat |            | 5-hydroxytryptamine 1 receptor, serotonergic receptor [-]                           |
| 5-HT1B/1D           | wombat |            | 5-hydroxytryptamine 1 receptor [-]                                                  |
| 5-HT1C              | wombat |            | 5-hydroxytryptamine 2C receptor [-]                                                 |
| 5-HT1-like          | wombat |            | 5-hydroxytryptamine 1-like receptor                                                 |
| 5-HT4E              | wombat |            | 5-hydroxytryptamine 4 receptor [-]                                                  |
| 6-PGDH              | wombat | (ommitted) | 6-phosphogluconate dehydrogenase [-]                                                |
| ABCA-1              | wombat | (ommitted) | ATP-binding cassette sub-family A member 1, ATP-binding cassette transporter 1 [+]  |
| Abl                 | wombat |            | tyrosine-protein kinase transforming protein Abl [-]                                |
| AC                  | wombat |            | adenylyl cyclase type I [-]                                                         |
| ACAT                | wombat |            | acylCoA:cholesterol O-acyltransferase [-]                                           |
| ACC                 | wombat | (ommitted) | acetyl-CoA carboxylase 1 [-]                                                        |
| AcpS                | wombat | (ommitted) | holo-[acyl-carrier-protein] synthase [-]                                            |
| ADH pi              | wombat | (ommitted) | alcohol dehydrogenase [-]                                                           |
| ADH sigma           | wombat | (ommitted) | alcohol dehydrogenase [-]                                                           |
| AdoHcy hydrolase    | wombat |            | S-adenosyl-L-homocysteine hydrolase [-]                                             |
| AdoMetDC            | wombat | (ommitted) | S-adenosylmethionine decarboxylase [-]                                              |
| AhR                 | wombat |            | aryl hydrocarbon receptor [-]                                                       |
| AIDH                | wombat |            | aldehyde dehydrogenase 1A2 [-]                                                      |
| ALDH2               | wombat | (ommitted) | aldehyde dehydrogenase 1A2 [-]                                                      |
| ALK-5               | wombat |            | activin receptor-like kinase 5, transforming growth factor-beta type I receptor [-] |
| alpha2d             | wombat |            | alpha2d adrenergic receptor [-]                                                     |
| alpha-galactosidase | wombat |            | alpha-D-galactoside galactohydrolase, alpha-D-galactosidase A, agalsidase alfa [-]  |
| alpha-glucosidase   | wombat | (ommitted) | alpha-glucosidase II [-]                                                            |
| alpha-L-fucosidase  | wombat |            | alpha-L-fucoside fucohydrolase [-]                                                  |
| alpha-L-fucosidase  | wombat |            | alpha-L-fucoside fucohydrolase [-]                                                  |
| I                   |        |            |                                                                                     |
| alpha-              | wombat | (ommitted) | Golgi alpha-mannosidase II [-]                                                      |

mannosidase

|                     |        |            |                                                                                           |
|---------------------|--------|------------|-------------------------------------------------------------------------------------------|
| ALR2                | wombat |            | aldose reductase 2 [-]                                                                    |
| AMO                 | wombat |            | copper-containing amine oxidase, tyramine oxidase [-]                                     |
| AMPK                | wombat | (ommitted) | 5'-AMP-activated protein kinase, catalytic alpha-1 chain [-]                              |
| AM-R                | wombat | (ommitted) | Adrenomedullin receptor [-]                                                               |
| ANT                 | wombat |            | anandamide transporter [-]                                                                |
| AOS                 | wombat | (ommitted) | allene oxide synthase, cytochrome P450 74A, hydroperoxide dehydrase [-]                   |
| APA                 | wombat |            | aminopeptidase A [-]                                                                      |
| APN                 | wombat |            | aminopeptidase N, alanyl aminopeptidase [-]                                               |
| AP-TNAP             | wombat | (ommitted) | alkaline phosphatase, tissue-nonspecific isozyme precursor, liver/bone/kidney isozyme [-] |
| ASGP-R              | wombat | (ommitted) | asialoglycoprotein receptor, hepatic lectin 1 [-]                                         |
| A-SMase             | wombat |            | sphingomyelin phosphodiesterase, acid sphingomyelinase [-]                                |
| AT                  | wombat |            | angiotensin II receptor [-]                                                               |
| ATM                 | wombat | (ommitted) | ataxia-telangiectasia mutated protein                                                     |
| BAO                 | wombat |            | benzylamine oxidase [-]                                                                   |
| Bcl-2               | wombat |            | Bcl-2 [-]                                                                                 |
| beta                | wombat |            | beta adrenergic receptor [-]                                                              |
| beta1               | wombat |            | beta1 adrenergic receptor [-]                                                             |
| beta-galactosidase  | wombat |            | beta-galactosidase [-]                                                                    |
| beta-glucuronidase  | wombat |            | beta-glucuronidase [-]                                                                    |
| beta-hexosaminidase | wombat | (ommitted) | N-acetyl-beta-glucosaminidase [-]                                                         |
| beta-lactamase      | wombat | (ommitted) | beta-lactamase TEM-1, penicillinase [-]                                                   |
| BK B1               | wombat |            | B1 bradykinin receptor [-]                                                                |
| BK B2               | wombat | (ommitted) | B2 bradykinin receptor [-]                                                                |
| Blk                 | wombat |            | tyrosine-protein kinase BLK, B lymphocyte kinase [-]                                      |
| BN/GRP              | wombat | (ommitted) | GRP-preffering bombesin receptor [-]                                                      |
| BoNt/B              | wombat | (ommitted) | botulinum neurotoxin type B [-]                                                           |
| BRS-3               | wombat |            | bombesin receptor [+]                                                                     |
| C3                  | wombat | (ommitted) | complement component C3 [-]                                                               |
| Ca(2+) ATPase       | wombat |            | Ca(2+) ATPase [-]                                                                         |
| Ca(2+)              | wombat | (ommitted) | voltage-dependent L-type calcium channel [-]                                              |

|               |        |            |                                                                                                                                         |
|---------------|--------|------------|-----------------------------------------------------------------------------------------------------------------------------------------|
| channel/DHP   |        |            |                                                                                                                                         |
| c-Abl         | wombat |            | tyrosine-protein kinase transforming protein Abl [-]                                                                                    |
| calcineurin   | wombat |            | serine/threonine protein phosphatase 2B catalytic subunit, alpha isoform, calmodulin-dependent calcineurin A subunit, alpha isoform [-] |
| CaM           | wombat | (ommitted) | calcium/calmodulin-dependent protein kinase type I [-]                                                                                  |
| CaMPKase      | wombat | (ommitted) | calcium/calmodulin-dependent protein kinase type I [-]                                                                                  |
| CaMPKase II   | wombat |            | Ca(2+)/calmodulin-dependent kinase II [-]                                                                                               |
| cannabinoid   | wombat |            | cannabinoid receptor [-]                                                                                                                |
| caspase       | wombat |            | caspase [+]                                                                                                                             |
| caspase-1     | wombat |            | caspase-1, interleukin-1 beta converting enzyme [-]                                                                                     |
| caspase-4     | wombat | (ommitted) | ICH-2 protease, TX protease [-]                                                                                                         |
| caspase-5     | wombat | (ommitted) | ICH-3 protease, TY protease [-]                                                                                                         |
| caspase-6     | wombat |            | apoptotic protease Mch-2 [-]                                                                                                            |
| caspase-7     | wombat |            | apoptotic protease Mch-3 [-]                                                                                                            |
| caspase-8     | wombat |            | apoptotic protease Mch-5 [-]                                                                                                            |
| cathepsin B   | wombat |            | APP secretase [-]                                                                                                                       |
| cathepsin S   | wombat |            | cathepsin S [-]                                                                                                                         |
| CBG           | wombat | (ommitted) | corticosteroid-binding globulin, transcortin [-]                                                                                        |
| CCK           | wombat |            | gastrin/cholecystokinin receptor [-]                                                                                                    |
| CCK2          | wombat |            | gastrin/cholecystokinin type B receptor [-]                                                                                             |
| CCR2          | wombat |            | C-C chemokine receptor type 2 [-]                                                                                                       |
| CD80          | wombat | (ommitted) | T lymphocyte activation antigen CD80, activation B7-1 antigen [-]                                                                       |
| CDK           | wombat |            | cyclin-dependent kinase [-]                                                                                                             |
| CDK1          | wombat |            | cyclin-dependent kinase 1 [-]                                                                                                           |
| CDK1/cyclin B | wombat |            | cyclin-dependent kinase 1 [-]                                                                                                           |
| CDK2          | wombat |            | cyclin-dependent kinase 2 [-]                                                                                                           |
| CDK5          | wombat |            | cell division protein kinase 5 [-]                                                                                                      |
| CEase         | wombat |            | cholesterol esterase [-]                                                                                                                |
| cellobiase    | wombat |            | beta-glucosidase, gentiobiase, amygdalase [-]                                                                                           |
| CFTR          | wombat | (ommitted) | cystic fibrosis transmembrane conductance regulator, cAMP-dependent chloride channel                                                    |
| CGRP1 R       | wombat |            | calcitonin gene-related peptide type 1 receptor [-]                                                                                     |
| ChAT          | wombat | (ommitted) | choline O-acetyltransferase                                                                                                             |
| ChC           | wombat | (ommitted) | Clostridium histolyticum collagenase [-]                                                                                                |



|               |        |            |                                                                                                |
|---------------|--------|------------|------------------------------------------------------------------------------------------------|
| ChoK          | wombat | (ommitted) | choline kinase [-]                                                                             |
| CHS           | wombat | (ommitted) | chitin synthase 1, chitin-UDP acetyl-glucosaminyl transferase 1, Class-I chitin synthase 1 [-] |
| chymotrypsin  | wombat |            | chymotrypsinogen A [-]                                                                         |
| CK1           | wombat | (ommitted) | casein kinase I, alpha isoform [-]                                                             |
| CK2           | wombat | (ommitted) | casein kinase II [-]                                                                           |
| c-Kit         | wombat |            | mast/stem cell growth factor receptor, proto-oncogene tyrosine-protein kinase Kit [-]          |
| collagen      | wombat |            | collagen [-]                                                                                   |
| COMT          | wombat | (ommitted) | catecholamine O-Me transferase [-]                                                             |
| COX           | wombat |            | prostaglandin H2 synthase [-]                                                                  |
| CPB           | wombat | (ommitted) | cysteine protease B [-]                                                                        |
| CPG2          | wombat |            | carboxypeptidase G2 [-]                                                                        |
| CRABP-II      | wombat |            | cellular retinoic acid binding protein [-]                                                     |
| CRDGF         | wombat | (ommitted) | colorectum cell-derived growth factor [-]                                                      |
| CRF-R2        | wombat | (ommitted) | corticotropin releasing factor receptor 2, corticotropin-releasing hormone receptor 2 [-]      |
| c-Src         | wombat |            | proto-oncogene tyrosine-protein kinase SRC [-]                                                 |
| CT-R          | wombat | (ommitted) | calcitonin receptor precursor [-]                                                              |
| CXCR          | wombat |            | C-X-C chemokine receptor [-]                                                                   |
| Cyt c         | wombat | (ommitted) | cytochrome c                                                                                   |
| Cyt-P450      | wombat |            | cytochrome P450 [-]                                                                            |
| Cyt-P450-11A1 | wombat | (ommitted) | cytochrome P450 11A1, steroid 11-beta-hydroxylase [-]                                          |
| Cyt-P450-11B1 | wombat | (ommitted) | cytochrome P450 11B1 [-]                                                                       |
| Cyt-P450-11B2 | wombat |            | cytochrome P450 11B2 [-]                                                                       |
| Cyt-P450-26   | wombat |            | cytochrome P450 26, retinoic acid 4-hydroxylase [-]                                            |
| Cyt-P450-26A1 | wombat |            | cytochrome P450 26A1, retinoic acid-metabolizing cytochrome [-]                                |
| Cyt-P450-27   | wombat |            | cytochrome P450 27, 25-hydroxyvitamin D(3) 1-alpha-hydroxylase [-]                             |
| Cyt-P450-2A5  | wombat |            | coumarin 7-hydroxylase [-]                                                                     |
| Cyt-P450-2C8  | wombat |            | S-mephenytoin 4-hydroxylase [-]                                                                |
| Cyt-P450-3A   | wombat |            | quinine 3-monooxygenase, nifedipine oxidase [-]                                                |
| Cyt-P450-4F2  | wombat |            | cytochrome P450 4F2 [-]                                                                        |
| Cyt-P450-51   | wombat | (ommitted) | sterol 14-alpha demethylase, lanosterol 14-alpha demethylase [-]                               |
| Cyt-P450-7A1  | wombat | (ommitted) | cytochrome P450 7A1, cholesterol 7-alpha-                                                      |

|                   |        |            |                                                                                                      |
|-------------------|--------|------------|------------------------------------------------------------------------------------------------------|
| D(D2+D3)          | wombat |            | hydroxylase [-]                                                                                      |
| D1A               | wombat |            | dopamine receptor [-]                                                                                |
| D1C               | wombat |            | D1A dopamine receptor [-]                                                                            |
| D2B               | wombat |            | D1C dopamine receptor                                                                                |
| D2C               | wombat |            | D2B dopamine receptor [-]                                                                            |
| DAO               | wombat | (ommitted) | D2C dopamine receptor                                                                                |
| DBHase            | wombat |            | diamine oxidase [-]                                                                                  |
| DDAH-1            | wombat | (ommitted) | dopamine beta-hydroxylase [-]                                                                        |
|                   |        |            | Dimethylarginine dimethylaminohydrolase 1,<br>NG,NG-dimethylarginine dimethylaminohydrolase 1<br>[-] |
| delta + kappa     | wombat |            | delta-type opioid receptor/kappa-type opioid<br>receptor [-]                                         |
| delta1            | wombat |            | delta-type opioid receptor [-]                                                                       |
| delta2            | wombat |            | delta-type opioid receptor [-]                                                                       |
| DHADH             | wombat |            | dihydroxyacetanilide dehydrogenase [-]                                                               |
| DHAE              | wombat |            | dihydroxyacetanilide epoxidase [-]                                                                   |
| DHNA              | wombat | (ommitted) | dihydroneopterin aldolase [-]                                                                        |
| DHPS              | wombat |            | dihydropteroate synthase [-]                                                                         |
| DHQase II         | wombat | (ommitted) | 3-dehydroquinate dehydratase [-]                                                                     |
| DHSase            | wombat |            | deoxyhipusine synthase [-]                                                                           |
| DNA               | wombat |            | DNA [-]                                                                                              |
| DNA polymerase    | wombat |            | DNA-directed RNA polymerase [-]                                                                      |
| DNA-PK            | wombat |            | ataxia-telangiectasia-mutated and Rad3-related<br>protein [-]                                        |
| dopamine receptor | wombat |            | dopamine receptor [-]                                                                                |
| DPP IV-beta       | wombat |            | dipeptidyl peptidase IV [-]                                                                          |
| DPP8              | wombat |            | dipeptidyl peptidase 8 [-]                                                                           |
| dUTPase           | wombat |            | deoxyuridine 5'-triphosphate nucleotidohydrolase,<br>mitochondrial, dUTP pyrophosphatase [-]         |
| DXP               | wombat | (ommitted) | 1-deoxy-D-xylulose 5-phosphate reductoisomerase<br>[-]                                               |
| dynammin-1        | wombat |            | dynammin-1 [-]                                                                                       |
| EAAT1             | wombat | (ommitted) | excitatory amino acid transporter 1, sodium-<br>dependent glutamate/aspartate transporter 1 [-]      |
| EAAT2             | wombat | (ommitted) | excitatory amino acid transporter 2, sodium-<br>dependent glutamate/aspartate transporter 2 [-]      |
| EcR               | wombat | (ommitted) | ecdysone receptor [+]                                                                                |

|                |        |            |                                                                                                                                |
|----------------|--------|------------|--------------------------------------------------------------------------------------------------------------------------------|
| EGFR           | wombat |            | epidermal growth factor receptor [-]                                                                                           |
| EH             | wombat | (ommitted) | microsomal epoxide hydrolase, epoxide hydratase [-]                                                                            |
| elastase       | wombat |            | elastase 1 [-]                                                                                                                 |
| endothiasepsin | wombat | (ommitted) | Endothia aspartic proteinase [-]                                                                                               |
| EP             | wombat | (ommitted) | prostaglandin E2 receptor, EP1 subtype [-]                                                                                     |
| EphB2          | wombat |            | erythropoietin-producing hepatocellular receptor tyrosine kinase [-]                                                           |
| ER             | wombat |            | estrogen receptor [-]                                                                                                          |
| ermAM          | wombat |            | erythromycin-resistance methylase, rRNA adenine N-6-methyltransferase, ErmAM methyltransferase [-]                             |
| ermC'          | wombat | (ommitted) | erythromycin-resistance methylase, rRNA adenine N-6-methyltransferase, ErmC' methyltransferase [-]                             |
| ERRalpha       | wombat |            | estrogen-related receptor, alpha, estrogen receptor-like 1 [-]                                                                 |
| E-selectin     | wombat |            | leukocyte-endothelial cell adhesion molecule 2, endothelial leukocyte adhesion molecule 1, ELAM-1, CD62E antigen, LECAM1 2 [-] |
| EST            | wombat | (ommitted) | estrogen sulfotransferase, estrone sulfotransferase [-]                                                                        |
| F1F0 ATPase    | wombat |            | ATP hydrolase [-]                                                                                                              |
| FabB           | wombat | (ommitted) | 3-oxoacyl-[acyl-carrier-protein] synthase 1, beta-ketoacyl-ACP synthase I [-]                                                  |
| FabH           | wombat | (ommitted) | 3-oxoacyl-[acyl-carrier-protein] synthase III, beta-ketoacyl-ACP synthase III [-]                                              |
| FabI           | wombat |            | enoyl-[acyl-carrier-protein] reductase [NADH] [-]                                                                              |
| FabZ           | wombat |            | (3R)-hydroxymyristoyl-[acyl carrier protein] dehydratase, (3R)-hydroxymyristoyl ACP dehydrase [-]                              |
| falcipain      | wombat | (ommitted) | falcipain 2 [-]                                                                                                                |
| falcipain 2    | wombat | (ommitted) | falcipain 2 [-]                                                                                                                |
| falcipain 2A   | wombat | (ommitted) | falcipain 2 [-]                                                                                                                |
| falcipain 2B   | wombat | (ommitted) | falcipain 2 [-]                                                                                                                |
| falcipain 3    | wombat | (ommitted) | falcipain 3 [-]                                                                                                                |
| FasLR          | wombat |            | apoptosis-mediating surface antigen Fas, Fas antigen, CD95 antigen, Apo-1 antigen [-]                                          |
| FBP            | wombat | (ommitted) | far upstream element binding protein 1, DNA helicase V                                                                         |

|            |        |            |                                                                                                                  |
|------------|--------|------------|------------------------------------------------------------------------------------------------------------------|
| Fbs1       | wombat | (ommitted) | flavin-binding kelch repeat F-box protein 1-like protein 1, adagio protein 2                                     |
| FGFR       | wombat | (ommitted) | fibroblast growth factor receptor 1 [-]                                                                          |
| FIV-1 PR   | wombat |            | FIV-1 retropepsin [-]                                                                                            |
| FKBP       | wombat |            | FK-506 binding protein, FK506-binding protein 8, FKBP38 [-]                                                      |
| FOLT       | wombat | (ommitted) | folate transporter 1 [-]                                                                                         |
| FPPSase    | wombat |            | farnesyl pyrophosphate synthetase, dimethylallyltranstransferase [-]                                             |
| FPR1       | wombat |            | formyl peptide receptor, N-formyl-Met-Leu-Phe receptor [-]                                                       |
| FSH-R      | wombat | (ommitted) | follicle-stimulating hormone receptor [-]                                                                        |
| furin      | wombat |            | paired basic amino acid residue cleaving enzyme, PACE [-]                                                        |
| fVII       | wombat |            | coagulation factor VII [-]                                                                                       |
| fXIV       | wombat | (ommitted) | vitamin K-dependent protein C, autoprote thrombin IIA, anticoagulant protein C, blood coagulation factor XIV [-] |
| Fyn        | wombat |            | proto-oncogene tyrosine-protein kinase Fyn [-]                                                                   |
| GABA ATase | wombat | (ommitted) | GABA aminotransferase [-]                                                                                        |
| GABA-A/PTX | wombat |            | gamma-aminobutyric acid receptor, picrotoxin site [-]                                                            |
| GAPDHase   | wombat | (ommitted) | glycosomal glyceraldehyde-3-phosphate dehydrogenase                                                              |
| GART       | wombat |            | GAR transformylase, glycinamide ribonucleotide formyltransferase [-]                                             |
| GAT2       | wombat | (ommitted) | sodium- and chloride-dependent GABA transporter 2 [-]                                                            |
| GAT3       | wombat | (ommitted) | sodium- and chloride-dependent GABA transporter 3 [-]                                                            |
| GDH        | wombat | (ommitted) | glutamate dehydrogenase [-]                                                                                      |
| GGTase     | wombat | (ommitted) | protein geranylgeranyltransferase type I alpha subunit [-]                                                       |
| GGTase I   | wombat | (ommitted) | protein geranylgeranyltransferase [-]                                                                            |
| GHRHR      | wombat | (ommitted) | growth hormone-releasing hormone receptor [-]                                                                    |
| GHSR       | wombat | (ommitted) | growth hormone secretagogue receptor, growth hormone-releasing peptide receptor [-]                              |
| Gi         | wombat |            | heterotrimeric G protein, alpha1 isoform [+]                                                                     |
| Glc-6-P    | wombat | (ommitted) | glucose-6-phosphate translocase, hydrolase [-]                                                                   |

|                    |        |            |                                                                                                                                    |
|--------------------|--------|------------|------------------------------------------------------------------------------------------------------------------------------------|
| translocase        |        |            |                                                                                                                                    |
| GLP-1              | wombat |            | glucagon-like peptide 1 receptor [+]                                                                                               |
| GLSase             | wombat | (ommitted) | 1,3-beta-D-glucan synthase [-]                                                                                                     |
| GluRac             | wombat | (ommitted) | glutamate racemase 1 [-]                                                                                                           |
| GLUT1              | wombat | (ommitted) | glucose transporter type 1, erythrocyte/brain, HepG2 glucose transporter [-]                                                       |
| glutamate receptor | wombat |            | glutamate receptor ionotropic [-]                                                                                                  |
| glyoxalase I       | wombat |            | lactoylglutathione lyase, S-D-lactoylglutathione methylglyoxal lyase, ketone-aldehyde mutase, methylglyoxalase, aldoketomutase [-] |
| GPR109b            | wombat | (ommitted) | nicotinic acid receptor 2, G-protein coupled receptor 109B [+]                                                                     |
| Grb2               | wombat |            | growth factor receptor-bound protein 2 [-]                                                                                         |
| GRO-alpha          | wombat | (ommitted) | growth-related oncogene, chemokine CXCL1/GRO-alpha [-]                                                                             |
| GS                 | wombat | (ommitted) | glycogen [starch] synthase [-]                                                                                                     |
| GSK-3alpha/beta    | wombat |            | glycogen synthase kinase-3 beta [-]                                                                                                |
| GSK-3beta          | wombat |            | glycogen synthase kinase-3 beta [-]                                                                                                |
| GSPS               | wombat |            | glutathionylspermidine synthase [-]                                                                                                |
| GSTase             | wombat | (ommitted) | glutathione S-transferase [-]                                                                                                      |
| GTPase             | wombat | (ommitted) | 7,8-dihydro-8-oxoguanine triphosphatase [+]                                                                                        |
| H(+)/K(+) ATPase   | wombat | (ommitted) | potassium-transporting ATPase [-]                                                                                                  |
| HB-EGF             | wombat | (ommitted) | heparin-binding EGF-like growth factor [-]                                                                                         |
| HBV RT             | wombat |            | hepatitis B virus reverse transcriptase [-]                                                                                        |
| HCoV 3CLP          | wombat | (ommitted) | human coronavirus 3C-like proteinase [-]                                                                                           |
| HDA-1A             | wombat | (ommitted) | histone deacetylase 1A [-]                                                                                                         |
| HDA-1B             | wombat | (ommitted) | histone deacetylase 1B [-]                                                                                                         |
| HDA2               | wombat | (ommitted) | histone deacetylase 2 [-]                                                                                                          |
| helicase           | wombat |            | human papillomavirus E1 helicase [-]                                                                                               |
| HEMA               | wombat | (ommitted) | hemagglutinin [-]                                                                                                                  |
| HIV-1 IN           | wombat | (ommitted) | nucleotidyltransferase [-]                                                                                                         |
| HIV-1 P            | wombat | (ommitted) | HIV-1 retropepsin [-]                                                                                                              |
| HIV-1 RT           | wombat | (ommitted) | RNA-directed DNA polymerase, DNA nucleotidyltransferase, revertase [-]                                                             |
| HIV-1 Tat          | wombat | (ommitted) | transactivating regulatory protein [-]                                                                                             |
| HIV-2 P            | wombat | (ommitted) | HIV-2 retropepsin [-]                                                                                                              |
| HIV-2 RT           | wombat | (ommitted) | RNA-directed DNA polymerase, DNA nucleotidyltransferase, revertase [-]                                                             |

|                        |        |            |                                                                                                 |
|------------------------|--------|------------|-------------------------------------------------------------------------------------------------|
| HK I                   | wombat |            | hexokinase type I, hexokinase-1 [-]                                                             |
| HLA class I            | wombat |            | HLA class I histocompatibility antigen, HLA-BH*2705 protein                                     |
| HLA-A2                 | wombat | (ommitted) | HLA class II histocompatibility antigen, A-2 alpha [-]                                          |
| HPK/P                  | wombat | (ommitted) | histidine-containing protein kinase/phosphorylase [-]                                           |
| HPRT                   | wombat | (ommitted) | hypoxanthine-guanine phosphoribosyltransferase [-]                                              |
| HRV 3C P               | wombat |            | HRV 3C P [-]                                                                                    |
| hsp90                  | wombat | (ommitted) | heat shock protein HSP 90-alpha [-]                                                             |
| HSV-1 TK               | wombat | (ommitted) | human simplex virus 1 thymidine kinase [-]                                                      |
| HSV-2 TK               | wombat |            | herpes simplex virus 2 thymidine kinase [-]                                                     |
| I-1                    | wombat |            | I1 imidazoline receptor [-]                                                                     |
| I1-IBS                 | wombat |            | I1 imidazolidine binding site [-]                                                               |
| I-2                    | wombat |            | I2 imidazoline receptor [-]                                                                     |
| I2-IBS                 | wombat |            | I2 imidazolidine binding site [-]                                                               |
| IAG-NH                 | wombat | (ommitted) | inosine-adenosine-guanosine-nucleoside hydrolase [-]                                            |
| IF-2                   | wombat | (ommitted) | translation initiation factor IF-2 [-]                                                          |
| IFN-alpha              | wombat |            | interferon-alpha [+]                                                                            |
| IFN-gamma              | wombat | (ommitted) | interferon-gamma [-]                                                                            |
| IgE                    | wombat |            | immunoglobulin E [-]                                                                            |
| IgE(LB4)               | wombat |            | IgE monoclonal antibody LB4                                                                     |
| IgE/FcERI              | wombat | (ommitted) | IgE FC receptor, alpha-subunit, high affinity immunoglobulin epsilon receptor alpha-subunit [-] |
| IGF1R                  | wombat |            | insulin-like growth factor I receptor [-]                                                       |
| IGFBP-1                | wombat | (ommitted) | insulin growth factor binding protein 1 [-]                                                     |
| IKK-alpha              | wombat |            | inhibitor of nuclear factor kappa B kinase alpha [-]                                            |
| IL-1beta               | wombat | (ommitted) | interleukin-1 beta, catabolin [-]                                                               |
| IL-2                   | wombat | (ommitted) | interleukin-2, T-cell growth factor [-]                                                         |
| IL-4                   | wombat | (ommitted) | interleukin-4, B-cell stimulatory factor 1 [-]                                                  |
| IL-5                   | wombat |            | interleukin-5, T-cell replacing factor [-]                                                      |
| IL-6                   | wombat | (ommitted) | interleukin-6, B-cell stimulatory factor 2, interferon beta-2 [-]                               |
| IMPDH                  | wombat | (ommitted) | inosine-5'-monophosphate dehydrogenase [-]                                                      |
| influenza A polymerase | wombat |            | RNA-directed RNA polymerase subunit P1, polymerase basic 1 protein [-]                          |
| influenza B polymerase | wombat | (ommitted) | RNA-directed RNA polymerase subunit P1, polymerase basic 1 protein [-]                          |
| Ins(3,4,5,6)P4 1K      | wombat |            | inositol 3,4,5,6 tetrakisphosphate 1-kinase [-]                                                 |

|                          |        |            |
|--------------------------|--------|------------|
| InsP3 5-phosphatase      | wombat | (ommitted) |
| InsP3-5-phosphatase      | wombat | (ommitted) |
| InsP3R1                  | wombat |            |
| InsP4R                   | wombat | (ommitted) |
| INSR                     | wombat |            |
| integrase                | wombat |            |
| IP3K                     | wombat | (ommitted) |
| IRS                      | wombat | (ommitted) |
| IU-NH                    | wombat | (ommitted) |
| JAK-3                    | wombat |            |
| JHE                      | wombat | (ommitted) |
| JNK2alpha1               | wombat | (ommitted) |
| K(+) channel             | wombat | (ommitted) |
| K3H                      | wombat |            |
| kallikrein               | wombat |            |
| kappa1                   | wombat |            |
| kappa2b                  | wombat |            |
| kappa3                   | wombat |            |
| K-ATP                    | wombat |            |
| KIAA1363                 | wombat |            |
| lactase                  | wombat | (ommitted) |
| LAP                      | wombat |            |
| L-CA                     | wombat |            |
| Lck                      | wombat |            |
| LCP                      | wombat | (ommitted) |
| LDH                      | wombat | (ommitted) |
| LDH-C4                   | wombat |            |
| LDL                      | wombat |            |
| LDL-R                    | wombat | (ommitted) |
| LFA-1                    | wombat |            |
| L-HDH                    | wombat |            |
| lipoprotein              | wombat |            |
| low density lipoproteins | wombat |            |

inositol-1,4,5-trisphosphate 5-phosphatase [-]  
inositol-1,4,5-trisphosphate 5-phosphatase [-]  
inositol 1,4,5-triphosphate receptor type 1 [-]  
inositol-(1,3,4,5)-tetrakisphosphate receptor [-]  
insulin receptor [-]  
nucleotidyltransferase [-]  
inositol-trisphosphate 3-kinase [-]  
isoleucyl-tRNA synthetase [-]  
inosine-uridine preferring nucleoside hydrolase [-]  
tyrosine-protein kinase JAK3, Janus kinase 3 [-]  
juvenile hormone esterase [-]  
C-JUN amino-terminal kinase-2 alpha1 [-]  
ATP-sensitive K(+) channel [-]  
kynurenine 3-hydroxylase [-]  
kallikrein 1 [-]  
kappa-type opioid receptor [-]  
kappa-type opioid receptor [-]  
kappa-type opioid receptor [-]  
ATP-sensitive K(+) channel [-]  
KIAA1363 protein [-]  
beta-galactosidase [-]  
cytosol aminopeptidase, leucyl aminopeptidase [-]  
leukocyte common antigen precursor, CD45 antigen [-]  
proto-oncogene tyrosine-protein kinase Lck [-]  
Leishmania donovani cysteine protease [-]  
L-lactate dehydrogenase [-]  
lactate dehydrogenase [-]  
low density lipoprotein [-]  
low-density lipoprotein [+]  
leukocyte function-associated antigen-1, CD11a/CD18, alphaL/beta2 [-]  
L-hexonate dehydrogenase [-]  
lipoprotein [-]  
low density lipoproteins [-]

|                         |        |            |                                                                                                             |
|-------------------------|--------|------------|-------------------------------------------------------------------------------------------------------------|
| Lp(a)                   | wombat | (ommitted) | apolipoprotein(a) [-]                                                                                       |
| LRS                     | wombat |            | leucyl-tRNA synthetase [-]                                                                                  |
| LSD                     | wombat | (ommitted) | Lignostilbene alpha, beta-dioxygenase [-]                                                                   |
| L-selectin              | wombat |            | leukocyte-endothelial cell adhesion molecule 1, CD62L [-]                                                   |
| LTA4 hydrolase          | wombat |            | leukotriene A4 hydrolase [-]                                                                                |
| LTB4                    | wombat | (ommitted) | leukotriene B4 receptor 1 [-]                                                                               |
| LTB4 R1                 | wombat |            | leukotriene B4 receptor [-]                                                                                 |
| LTD4                    | wombat |            | cysteinyl leukotriene receptor 1, leukotriene D4 receptor [-]                                               |
| LTD4 R                  | wombat |            | cysteinyl leukotriene receptor 1, leukotriene D4 receptor [-]                                               |
| LTE4 R                  | wombat |            | leukotriene E4 receptor [-]                                                                                 |
| luciferase              | wombat | (ommitted) | luciferin 4-monooxygenase [-]                                                                               |
| LuxS                    | wombat | (ommitted) | S-ribosylhomocysteinase, autoinducer-2 production protein luxS [-]                                          |
| Lyn                     | wombat |            | tyrosine-protein kinase Lyn [-]                                                                             |
| lysozyme                | wombat |            | lysozyme [-]                                                                                                |
| m3/m2                   | wombat |            | muscarinic acetylcholine receptor [+]                                                                       |
| mAb 1B3                 | wombat |            | monoclonal antibody 1B3 [-]                                                                                 |
| maltase                 | wombat |            | alpha-glucosidase [-]                                                                                       |
| MAO                     | wombat | (ommitted) | amine oxidase [flavin-containing] A [-]                                                                     |
| MAPK p38                | wombat |            | cytokine suppressive anti-inflammatory drug binding protein, mitogen-activated protein kinase p38 alpha [-] |
| MCA                     | wombat |            | mycothiol-S-conjugate amidase [-]                                                                           |
| MCHR1                   | wombat |            | melanin-concentrating hormone receptor 1 [-]                                                                |
| MCR                     | wombat |            | melanocortin receptor [-]                                                                                   |
| MDH                     | wombat |            | malate dehydrogenase [-]                                                                                    |
| Mek1                    | wombat | (ommitted) | mitogen-activated protein kinase kinase kinase 1 [-]                                                        |
| melatonin               | wombat |            | melatonin receptor [-]                                                                                      |
| mGluR                   | wombat |            | metabotropic glutamate receptor [-]                                                                         |
| mGluR1                  | wombat |            | metabotropic glutamate receptor 1 [-]                                                                       |
| mGluR1a                 | wombat |            | metabotropic glutamate receptor 1a [-]                                                                      |
| mGluR2                  | wombat |            | metabotropic glutamate receptor 2 [-]                                                                       |
| mGluR4                  | wombat |            | metabotropic glutamate receptor 4 [-]                                                                       |
| mitochondrial complex I | wombat | (ommitted) | NADH:ubiquinone oxidoreductase [-]                                                                          |



|                               |        |            |                                                                                                          |
|-------------------------------|--------|------------|----------------------------------------------------------------------------------------------------------|
| MKK1                          | wombat |            | mitogen-activated protein kinase kinase kinase 1 [-]                                                     |
| MLK-3                         | wombat | (ommitted) | mitogen-activated protein kinase kinase kinase 11 [-]                                                    |
| MLK-7                         | wombat |            | mixed lineage kinase 7 [-]                                                                               |
| MMP-13                        | wombat |            | collagenase 3, matrix metalloprotease-13 [-]                                                             |
| MRS                           | wombat | (ommitted) | methionyl-tRNA synthetase [-]                                                                            |
| MT1                           | wombat |            | melatonin receptor type 1a [-]                                                                           |
| MT3                           | wombat |            | melatonin receptor type 3, melatonin receptor type 1c [-]                                                |
| MTL-R                         | wombat |            | motilin receptor [-]                                                                                     |
| mu1                           | wombat |            | mu-type opioid receptor [-]                                                                              |
| mu2                           | wombat |            | mu-type opioid receptor [-]                                                                              |
| murB                          | wombat | (ommitted) | UDP-N-acetylenolpyruvoylglucosamine reductase, UDP-N-acetylmuramate dehydrogenase [-]                    |
| murC                          | wombat | (ommitted) | UDP-N-acetylmuramate-L-alanine ligase, UDP-N-acetylmuramoyl-L-alanine synthetase [-]                     |
| MurD                          | wombat | (ommitted) | UDP-N-acetylmuramoylalanine-D-glutamate ligase, UDP-N-acetylmuramoyl-L-alanyl-D-glutamate synthetase [-] |
| murD                          | wombat | (ommitted) | UDP-N-acetylmuramoylalanine-D-glutamate ligase, UDP-N-acetylmuramoyl-L-alanyl-D-glutamate synthetase [-] |
| murF                          | wombat | (ommitted) | UDP-N-acetylmuramoyl-tripeptide-D-alanyl-D-alanine ligase, D-alanyl-D-alanine-adding enzyme [-]          |
| muscarinic                    | wombat |            | muscarinic acetylcholine receptor [-]                                                                    |
| Na(+)/(K+)-ATPase             | wombat | (ommitted) | sodium/potassium-transporting ATPase, sodium pump 1 [-]                                                  |
| Na(+)/Ca(2+)-exchanger        | wombat | (ommitted) | sodium/calcium exchanger 1, Na(+)/Ca(2+)-exchange protein 1 [-]                                          |
| Na(+)/D-glucose cotransporter | wombat |            | sodium-D-glucose cotransporter [-]                                                                       |
| nAChR-5HT3                    | wombat |            | neuronal acetylcholine receptor, 5-hydroxy tryptamine 3 receptor                                         |
| NADH oxidoreductase           | wombat | (ommitted) | NADH:ubiquinone oxidoreductase [-]                                                                       |
| NADPH-Cyt c reductase         | wombat |            | NADPH-cytochrome c reductase                                                                             |
| NADS                          | wombat | (ommitted) | NH(3)-dependent NAD(+) synthetase [-]                                                                    |

|                 |        |            |                                                       |
|-----------------|--------|------------|-------------------------------------------------------|
| NAT             | wombat | (ommitted) | arylamine N-acetyltransferase [-]                     |
| NC/KOR-3        | wombat | (ommitted) | orphanin FQ/nociceptin receptor, kappa-type 3         |
| neuraminidase   | wombat | (ommitted) | opioid receptor [-]                                   |
| NFAT-1          | wombat | (ommitted) | influenza A sialidase [-]                             |
| NHE-2           | wombat | (ommitted) | nuclear factor of activated T-cells 1 [-]             |
| NHE-3           | wombat | (ommitted) | Na(+)/H(+) exchanger 2, Na(+)/H(+) antiporter [-]     |
| NHE-5           | wombat | (ommitted) | Na(+)/H(+) exchanger 3, Na(+)/H(+) antiporter [-]     |
| nitroreductase  | wombat | (ommitted) | Na(+)/H(+) exchanger 5, Na(+)/H(+) antiporter [-]     |
| NMB-R           | wombat |            | oxygen insensitive NAD(P)H nitroreductase [-]         |
| NMDA/Gly        | wombat |            | neuromedin B receptor [+]                             |
| NOXase          | wombat |            | glutamate receptor ionotropic, NMDA, glycine site [-] |
| NPAA            | wombat |            | NADH oxidase [-]                                      |
| NPFF            | wombat | (ommitted) | N-palmitoylethanolamine-selective acid amidase [-]    |
| NPY2-R          | wombat |            | neuropeptide FF receptor type 1 [-]                   |
| NPY4-R          | wombat | (ommitted) | neuropeptide Y receptor type 2 [-]                    |
| NPY-R           | wombat |            | neuropeptide Y receptor type 4 [-]                    |
| NRase           | wombat | (ommitted) | neuropeptide Y receptor [-]                           |
| NS3 P           | wombat | (ommitted) | Escherichia coli B nitroreductase, oxygen             |
| NS3/4A P        | wombat | (ommitted) | insensitive NAD(P)H nitroreductase [-]                |
| NS3/NS4A P      | wombat | (ommitted) | hepacivirin [-]                                       |
| NS3P            | wombat | (ommitted) | hepacivirin [-]                                       |
| NS5B            | wombat | (ommitted) | hepacivirin [-]                                       |
| NS5B P          | wombat | (ommitted) | hepacivirin [-]                                       |
| N-SMase         | wombat |            | nonstructural protein NS5B, RNA-directed RNA          |
| NT3             | wombat |            | polymerase [-]                                        |
| NTPase/helicase | wombat |            | nonstructural protein NS5B, RNA-directed RNA          |
| NTPDase1        | wombat |            | polymerase [-]                                        |
| OAR             | wombat | (ommitted) | neutral sphingomyelinase [-]                          |
| opioid          | wombat |            | neurotensin receptor type 3 [-]                       |
| p21             | wombat |            | West Nile virus NTPase/helicase [-]                   |
| P2X1 R          | wombat |            | ectonucleoside triphosphate diphosphohydrolase 1      |
| P2X2 R          | wombat |            | [-]                                                   |
|                 |        |            | octopamine receptor [+]                               |
|                 |        |            | opioid receptor [-]                                   |
|                 |        |            | p21 protein [-]                                       |
|                 |        |            | P2X purinoceptor 1 [-]                                |
|                 |        |            | P2X purinoceptor 2 [-]                                |

|                |        |            |                                                                                                                                                                          |
|----------------|--------|------------|--------------------------------------------------------------------------------------------------------------------------------------------------------------------------|
| P2X3 R         | wombat |            | P2X purinoceptor 3 [-]                                                                                                                                                   |
| P2Y R          | wombat |            | P2Y purinoceptor [-]                                                                                                                                                     |
| P2Y1 R         | wombat | (ommitted) | P2Y purinoceptor 1 [-]                                                                                                                                                   |
| P2Y11 R        | wombat | (ommitted) | P2Y purinoceptor 11 [-]                                                                                                                                                  |
| p34cdc2/kinase | wombat | (ommitted) | cyclin-dependent kinase 1 [-]                                                                                                                                            |
| P3LP           | wombat |            | P3 purinoceptor, P3 purinoceptor-like protein [-]                                                                                                                        |
| p53            | wombat | (ommitted) | tumor suppressor p53-binding protein 2 [-]                                                                                                                               |
| PAF-R          | wombat |            | platelet-activating factor receptor [-]                                                                                                                                  |
| PAI-1          | wombat |            | plasminogen activator inhibitor-1, endothelial plasminogen activator inhibitor [-]                                                                                       |
| PAPT           | wombat |            | putrescine aminopropyltransferase, spermidine synthase [-]                                                                                                               |
| PAR            | wombat | (ommitted) | thrombin receptor, protease activated receptor-1                                                                                                                         |
| PARG           | wombat | (ommitted) | poly(ADP-ribose) glycohydrolase [-]                                                                                                                                      |
| PAT            | wombat |            | amino acid-polyamine-organocation (APC) transporter [-]                                                                                                                  |
| PBP1a          | wombat | (ommitted) | penicillin-insensitive transglycosylase, penicillin-sensitive transpeptidase [-]                                                                                         |
| PBP1b          | wombat | (ommitted) | penicillin-insensitive transglycosylase, penicillin-sensitive transpeptidase [-]                                                                                         |
| PBP2           | wombat |            | penicillin-sensitive transpeptidase [-]                                                                                                                                  |
| PBP3           | wombat | (ommitted) | peptidoglycan synthetase ftsI precursor, peptidoglycan glycosyltransferase 3, penicillin-binding protein 3 [-]                                                           |
| PBP4           | wombat | (ommitted) | penicillin-binding protein 4 [-]                                                                                                                                         |
| pCa            | wombat |            | protein C activator [-]                                                                                                                                                  |
| PCPase         | wombat | (ommitted) | bone morphogenetic protein 1 precursor, procollagen C-proteinase [-]                                                                                                     |
| PDE            | wombat |            | cAMP-specific PDE [-]                                                                                                                                                    |
| PDE1/PDE5      | wombat |            | phosphodiesterase [-]                                                                                                                                                    |
| PDE4A          | wombat |            | cAMP-specific PDE [-]                                                                                                                                                    |
| PDE5A          | wombat |            | cGMP-specific PDE [-]                                                                                                                                                    |
| PDGFR          | wombat |            | platelet derived growth factor receptor [-]                                                                                                                              |
| PDGFR-beta     | wombat |            | platelet derived growth factor receptor [-]                                                                                                                              |
| PDH            | wombat |            | dihydrolipoyllsine-residue acetyltransferase component of pyruvate dehydrogenase complex, dihydrolipoamide acetyltransferase component of pyruvate dehydrogenase complex |
| PEP            | wombat |            | prolyl endopeptidase, prolyl oligopeptidase [-]                                                                                                                          |

|                   |        |            |                                                                                              |
|-------------------|--------|------------|----------------------------------------------------------------------------------------------|
| PGH               | wombat | (ommitted) | peptidylglycine monooxygenase, peptidylglycine 2-hydroxylase [-]                             |
| PHXase            | wombat | (ommitted) | prolyl 4-hydroxylase, procollagen-proline, 2-oxo-glutarate-4-dioxygenase [-]                 |
| PI3-K             | wombat |            | phosphatidylinositol 3-kinase [-]                                                            |
| Pin1              | wombat |            | peptidyl-prolyl cis-trans isomerase, rotamase [-]                                            |
| PI-PLC            | wombat |            | phosphatidylinositol-specific phospholipase C [-]                                            |
| PKB               | wombat |            | protein kinase B, beta, RAC-beta serine/threonine protein kinase, protein kinase Akt-2 [-]   |
| PKC-beta1         | wombat |            | protein kinase C type beta-I [-]                                                             |
| PKC-iota          | wombat |            | protein kinase C, iota type [-]                                                              |
| PLA1              | wombat |            | phospholipase A1, phosphatidylcholine 1-acylhydrolase [-]                                    |
| PLB1              | wombat | (ommitted) | phospholipase B1 [-]                                                                         |
| PNMTase           | wombat |            | phenylethanolamine N-methyl transferase [-]                                                  |
| PNP               | wombat |            | purine nucleoside phosphorylase [-]                                                          |
| PNPPase           | wombat |            | 4-nitrophenylphosphatase [-]                                                                 |
| PO                | wombat |            | monophenol, dihydrophenylalanine: oxygen oxidoreductase [-]                                  |
| polymerase        | wombat | (ommitted) | DNA-directed DNA polymerase [-]                                                              |
| polymerase beta   | wombat | (ommitted) | DNA polymerase beta [-]                                                                      |
| POTA              | wombat |            | spermidine/putrescine transport ATP-binding protein potA [-]                                 |
| PP1               | wombat |            | protein phosphatase 1 [-]                                                                    |
| PP2A              | wombat |            | protein phosphatase 2A [-]                                                                   |
| PP2C              | wombat |            | protein phosphatase 2C [-]                                                                   |
| PPAT              | wombat | (ommitted) | phosphopantetheine adenylyltransferase, dephospho-CoA pyrophosphorylase [-]                  |
| PPi-PFK           | wombat | (ommitted) | PPi-dependent phosphofructokinase [-]                                                        |
| PPMTase           | wombat | (ommitted) | prenylcysteine carboxyl methyltransferase, prenylated protein carboxyl methyltransferase [-] |
| PR-A              | wombat |            | progesterone receptor [-]                                                                    |
| PR-B1             | wombat |            | progesterone receptor [-]                                                                    |
| probable HIV-1 RT | wombat | (ommitted) | RNA-directed DNA polymerase, DNA nucleotidyltransferase, revertase [-]                       |
| probable PGP      | wombat | (ommitted) | P-glycoprotein 1, multi-drug resistance protein 1                                            |
| MDR1              |        |            |                                                                                              |
| prolidase         | wombat |            | proline dipeptidase [-]                                                                      |
| PrP               | wombat |            | major prion protein [-]                                                                      |

|                        |        |            |                                                                                                         |
|------------------------|--------|------------|---------------------------------------------------------------------------------------------------------|
| P-selectin             | wombat |            | leukocyte-endothelial cell adhesion molecule 3, granule membrane protein 140, PADGEM, CD62P, LECAM3 [-] |
| PS-PLA1                | wombat | (ommitted) | phosphatidylserine-specific phospholipase A1 [-]                                                        |
| PTH/PTHr-R             | wombat | (ommitted) | parathyroid hormone/parathyroid hormone-related peptide receptor [+]                                    |
| PTP LAR                | wombat | (ommitted) | leukocyte common antigen-related phosphatase ptp2 [-]                                                   |
| PTPase-MEG2            | wombat | (ommitted) | protein tyrosine phosphatase, non-receptor type 9, protein-tyrosine phosphatase MEG2 [-]                |
| PTP-epsilon            | wombat | (ommitted) | protein-tyrosine phosphatase epsilon [-]                                                                |
| PTP-mu                 | wombat | (ommitted) | protein-tyrosine phosphatase mu [-]                                                                     |
| PTP-sigma              | wombat | (ommitted) | receptor-type protein-tyrosine phosphatase S, protein-tyrosine phosphatase sigma [-]                    |
| PXR                    | wombat |            | pregnane X receptor [-]                                                                                 |
| QUIS                   | wombat |            | glutamate receptor ionotropic, quisqualic acid site [-]                                                 |
| ras oncogene           | wombat | (ommitted) | Ki-ras oncogene [-]                                                                                     |
| retinoid               | wombat |            | retinoic acid receptor [+]                                                                              |
| RNA                    | wombat |            | RNA                                                                                                     |
| RNAP                   | wombat | (ommitted) | DNA-directed RNA polymerase [-]                                                                         |
| RNase L                | wombat | (ommitted) | 2-5A-dependent ribonuclease, ribonuclease L [-]                                                         |
| ROK                    | wombat | (ommitted) | rho-associated protein kinase 1 [-]                                                                     |
| rotamase               | wombat |            | peptidyl-prolyl cis-trans isomerase, rotamase [-]                                                       |
| RRase                  | wombat |            | ribonucleotide reductase [-]                                                                            |
| rRNA                   | wombat |            | rRNA [-]                                                                                                |
| SA                     | wombat | (ommitted) | serum albumin [-]                                                                                       |
| SAP                    | wombat | (ommitted) | secreted aspartic protease 2, candidapepsin 2, aspartate protease 2 [-]                                 |
| SAP2                   | wombat | (ommitted) | secreted aspartic protease 2, candidapepsin 2, aspartate protease 2 [-]                                 |
| SAPK2a                 | wombat |            | stress-activated protein kinase 2a, p38 [-]                                                             |
| SAPK2b                 | wombat |            | stress-activated protein kinase 2b, p38b2 [-]                                                           |
| SAPK3                  | wombat |            | stress-activated protein kinase 3, p38g [-]                                                             |
| SAPK4                  | wombat |            | stress-activated protein kinase 4, p38d [-]                                                             |
| SB-204269 binding site | wombat |            | SB-204269 binding site [-]                                                                              |
| SBP                    | wombat |            | sterol binding protein [-]                                                                              |
| SD                     | wombat |            | scytalone dehydratase [-]                                                                               |

|                    |        |            |                                                                                                                                              |
|--------------------|--------|------------|----------------------------------------------------------------------------------------------------------------------------------------------|
| sGC                | wombat |            | soluble guanylate cyclase [-]                                                                                                                |
| SHP-2              | wombat | (ommitted) | protein-tyrosine phosphatase 2C, protein-tyrosine phosphatase, non-receptor type 11 [-]                                                      |
| sialidase          | wombat | (ommitted) | influenza A neuraminidase [-]                                                                                                                |
| sigma              | wombat |            | sigma receptor [-]                                                                                                                           |
| sigma1/sigma2      | wombat |            | sigma receptor [-]                                                                                                                           |
| sigma2             | wombat |            | sigma receptor, type 2 [-]                                                                                                                   |
| sigma3             | wombat |            | sigma receptor, type 3 [-]                                                                                                                   |
| sigma-like         | wombat |            | sigma-like receptor [-]                                                                                                                      |
| Sir2               | wombat | (ommitted) | NAD-dependent histone deacetylase SIR2, silent information regulator 2 [-]                                                                   |
| SIRT2              | wombat |            | NAD-dependent deacetylase sirtuin 2 [-]                                                                                                      |
| sKasA              | wombat | (ommitted) | 3-oxoacyl-[acyl-carrier-protein] synthase 1, beta-ketoacyl-ACP synthase 1, KasA [-]                                                          |
| sKasB              | wombat | (ommitted) | 3-oxoacyl-[acyl-carrier-protein] synthase 2, beta-ketoacyl-ACP synthase 2 [-]                                                                |
| SkM1               | wombat |            | sodium channel, skeletal muscle type 1 [-]                                                                                                   |
| SOD                | wombat | (ommitted) | superoxide dismutase [-]                                                                                                                     |
| somatostatin       | wombat |            | somatostatin receptor [-]                                                                                                                    |
| SpsB               | wombat | (ommitted) | signal peptidase IB [-]                                                                                                                      |
| squalene epoxidase | wombat |            | squalene epoxidase [-]                                                                                                                       |
| SrtA               | wombat | (ommitted) | sortase A [-]                                                                                                                                |
| SSAO               | wombat | (ommitted) | semicarbazide-sensitive amine oxidase [-]                                                                                                    |
| SSAT               | wombat | (ommitted) | spermidine/spermine N(1)-acetyltransferase 1, putrescine acetyltransferase, diamine acetyltransferase 1, polyamine N-acetyltransferase 1 [-] |
| sst                | wombat |            | somatostatin receptor [-]                                                                                                                    |
| STase              | wombat | (ommitted) | alpha-N-acetylgalactosaminide alpha-2,6-sialyltransferase [-]                                                                                |
| Stat3              | wombat |            | signal transduction and activator of transcription 3, acute-phase response factor [-]                                                        |
| SV2/LBS            | wombat |            | synaptic vesicle protein SV2, levetiracetam binding site [-]                                                                                 |
| SVCT2              | wombat | (ommitted) | sodium-dependent vitamin C transporter 2, Na(+)/L-ascorbic acid transporter 2 [-]                                                            |
| TAAR1              | wombat | (ommitted) | trace amine-associated receptor 1, trace amine receptor 1 [+]                                                                                |

|                        |        |            |
|------------------------|--------|------------|
| TACE                   | wombat |            |
| TAFI                   | wombat |            |
| TATase                 | wombat | (ommitted) |
| TCR                    | wombat |            |
| Tec                    | wombat | (ommitted) |
| TeNt                   | wombat |            |
| TetP                   | wombat |            |
| TGase                  | wombat |            |
| TGFR-1 (ALK-5)         | wombat |            |
| TGFR-2                 | wombat |            |
| TGT                    | wombat | (ommitted) |
| THR-alpha              | wombat | (ommitted) |
| THR-alpha1             | wombat | (ommitted) |
| THR-beta               | wombat | (ommitted) |
| TMPKmt                 | wombat |            |
| TNFalpha               | wombat | (ommitted) |
| topoisomerase I        | wombat |            |
| topoisomerase II       | wombat |            |
| topoisomerase IV       | wombat | (ommitted) |
| TPO-R                  | wombat | (ommitted) |
| trehalase              | wombat | (ommitted) |
| TRHR2                  | wombat |            |
| tryptase               | wombat | (ommitted) |
| TTF rho                | wombat | (ommitted) |
| tubulin                | wombat | (ommitted) |
| UDG                    | wombat | (ommitted) |
| UDP-GlcNAc transporter | wombat |            |
| UDT1A4                 | wombat | (ommitted) |
| U-MtCK                 | wombat | (ommitted) |
| US-28                  | wombat | (ommitted) |
| v-Abl                  | wombat |            |
| VAcHT/vesamicol site   | wombat |            |
| vanilloid              | wombat |            |

|                                                                                     |
|-------------------------------------------------------------------------------------|
| TNFalpha converting enzyme [-]                                                      |
| thrombin-activatable fibrinolysis inhibitor [-]                                     |
| tyrosine aminotransferase [-]                                                       |
| T cell receptor [-]                                                                 |
| tyrosine-protein kinase Tec                                                         |
| tetanus neurotoxin [-]                                                              |
| tetracycline antiport transporter [-]                                               |
| transglutaminase [-]                                                                |
| activin receptor-like kinase 5, transforming growth factor-beta type I receptor [-] |
| TGF-beta receptor type II precursor [-]                                             |
| tRNA-guanine transglycosylase [-]                                                   |
| thyroid hormone receptor alpha [-]                                                  |
| thyroid hormone receptor alpha-1 [-]                                                |
| thyroid hormone receptor beta [-]                                                   |
| Mycobacterium tuberculosis thymidine monophosphate kinase [-]                       |
| tumor necrosis factor-alpha, cachectin [-]                                          |
| DNA topoisomerase I [-]                                                             |
| topoisomerase II [-]                                                                |
| topoisomerase IV [-]                                                                |
| thrombopoietin receptor [+]                                                         |
| alpha,alpha-trehalose glucohydrolase [-]                                            |
| thyrotropin-releasing hormone receptor subtype 2 [-]                                |
| tryptase 1 [-]                                                                      |
| transcription termination factor rho [-]                                            |
| tubulin [-]                                                                         |
| uracil DNA glycosylase [-]                                                          |
| UDP-N-acetylglucosamine transporter, Golgi UDP-GlcNAc transporter [-]               |
| UDP-glucuronosyltransferase 1A4 [-]                                                 |
| creatine kinase, ubiquitous mitochondrial [-]                                       |
| G-protein coupled receptor homolog US28 [-]                                         |
| tyrosine-protein kinase transforming protein Abl [-]                                |
| vesicular acetylcholine transporter, vesamicol site [-]                             |
| capsaicin receptor, vanilloid receptor [-]                                          |

|          |        |            |                                                                         |                                                     |
|----------|--------|------------|-------------------------------------------------------------------------|-----------------------------------------------------|
| VAT1     | wombat |            | chromaffin granule amine transporter, vesicular amine transporter 1 [-] |                                                     |
| V-ATPase | wombat | (ommitted) | vacuolar ATP synthase [-]                                               |                                                     |
| VEGFR-3  | wombat |            | vascular endothelial growth factor receptor 3 [-]                       |                                                     |
| VRS      | wombat | (ommitted) | valyl-tRNA synthetase [-]                                               |                                                     |
| VSP1     | wombat |            | vacuolar pyrophosphatase [-]                                            |                                                     |
| v-Src    | wombat | (ommitted) | tyrosine-protein kinase transforming protein Src [-]                    |                                                     |
| XO       | wombat |            | xanthine oxidase [-]                                                    |                                                     |
| Yes      | wombat |            | proto-oncogene tyrosine-protein kinase Yes [-]                          |                                                     |
| YOP      | wombat | (ommitted) | protein-tyrosine phosphatase yopH [-]                                   |                                                     |
|          | 1129   | mddr       | n/a                                                                     | Opioid Agonist                                      |
|          | 1131   | mddr       | n/a                                                                     | kappa Agonist                                       |
|          | 1132   | mddr       | n/a                                                                     | delta Agonist                                       |
|          | 1133   | mddr       | n/a                                                                     | mu Agonist                                          |
|          | 1150   | mddr       | n/a                                                                     | Opioid Mixed Agonist-Antagonist                     |
|          | 1210   | mddr       | n/a                                                                     | PGE2 Antagonist                                     |
|          | 2110   | mddr       | n/a                                                                     | Anaphylatoxin Receptor Antagonist                   |
|          | 2451   | mddr       | n/a                                                                     | IL-1beta Converting Enzyme Inhibitor                |
|          | 2456   | mddr       | n/a                                                                     | IL-8 Inhibitor                                      |
|          | 2520   | mddr       | n/a                                                                     | Bradykinin Antagonist                               |
|          | 2521   | mddr       | n/a                                                                     | Bradykinin BK1 Antagonist                           |
|          | 2522   | mddr       | n/a                                                                     | Bradykinin BK2 Antagonist                           |
|          | 2630   | mddr       | n/a                                                                     | Complement Inhibitor                                |
|          | 3200   | mddr       | n/a                                                                     | Xanthine Oxidase Inhibitor                          |
|          | 6210   | mddr       | n/a                                                                     | Benzodiazepine                                      |
|          | 6211   | mddr       | n/a                                                                     | Benzodiazepine Agonist                              |
|          | 6212   | mddr       | n/a                                                                     | Benzodiazepine Agonist/Antagonist                   |
|          | 6213   | mddr       | n/a                                                                     | Benzodiazepine Antagonist                           |
|          | 6214   | mddr       | n/a                                                                     | GABA A/Benzodiazepine Receptor Complex-Related Drug |
|          | 6215   | mddr       | n/a                                                                     | CRF Antagonist                                      |
|          | 6216   | mddr       | n/a                                                                     | Benzodiazepine Inverse Agonist                      |
|          | 6230   | mddr       | n/a                                                                     | 5 HT Antagonist                                     |
|          | 6232   | mddr       | n/a                                                                     | 5 HT2 Antagonist                                    |
|          | 6233   | mddr       | n/a                                                                     | 5 HT3 Antagonist                                    |
|          | 6234   | mddr       | n/a                                                                     | 5 HT1 Agonist                                       |
|          | 6235   | mddr       | n/a                                                                     | 5 HT1A Agonist                                      |
|          | 6236   | mddr       | n/a                                                                     | 5 HT1B Agonist                                      |



|       |      |     |
|-------|------|-----|
| 6237  | mddr | n/a |
| 6240  | mddr | n/a |
| 6241  | mddr | n/a |
| 6242  | mddr | n/a |
| 6243  | mddr | n/a |
| 6246  | mddr | n/a |
| 6247  | mddr | n/a |
| 6248  | mddr | n/a |
| 6249  | mddr | n/a |
| 6250  | mddr | n/a |
| 6251  | mddr | n/a |
| 7701  | mddr | n/a |
| 7702  | mddr | n/a |
| 7703  | mddr | n/a |
| 7707  | mddr | n/a |
| 7708  | mddr | n/a |
| 7709  | mddr | n/a |
| 7710  | mddr | n/a |
| 8010  | mddr | n/a |
| 8015  | mddr | n/a |
| 8400  | mddr | n/a |
| 8410  | mddr | n/a |
| 8420  | mddr | n/a |
| 8450  | mddr | n/a |
| 8451  | mddr | n/a |
| 9221  | mddr | n/a |
| 9229  | mddr | n/a |
| 9231  | mddr | n/a |
| 9248  | mddr | n/a |
| 9249  | mddr | n/a |
| 9254  | mddr | n/a |
| 10500 | mddr | n/a |
| 11123 | mddr | n/a |
| 11124 | mddr | n/a |
| 11125 | mddr | n/a |
| 11130 | mddr | n/a |
| 12125 | mddr | n/a |

5 HT1C Agonist  
5 HT1A Antagonist  
5 HT4 Agonist  
5 HT4 Antagonist  
5 HT3 Agonist  
5 HT1D Agonist  
5 HT1D Antagonist  
5 HT2A Antagonist  
5 HT2B Antagonist  
5 HT2C Antagonist  
5 HT1F Agonist  
Dopamine (D2) Antagonist  
Dopamine (D1) Antagonist  
Dopamine (D3) Antagonist  
Adenosine (A1) Agonist  
Adenosine (A2) Agonist  
Neurotensin Receptor Antagonist  
Dopamine (D4) Antagonist  
Adrenoceptor (alpha2) Antagonist  
Adrenoceptor (alpha1) Agonist  
MAO Inhibitor  
MAO A Inhibitor  
MAO B Inhibitor  
Adenosine (A1) Antagonist  
Adenosine (A2) Antagonist  
Acetylcholinesterase Inhibitor  
Nicotinic Agonist  
TRH Analog  
Prolylendopeptidase Inhibitor  
Muscarinic (M1) Agonist  
Muscarinic (M2) Antagonist  
GABA-B Receptor Antagonist  
Dopamine Agonist  
Dopamine (D1) Agonist  
Dopamine (D2) Agonist  
MAO B Inhibitor  
GABA B Agonist

|       |      |     |                                           |
|-------|------|-----|-------------------------------------------|
| 12455 | mddr | n/a | NMDA Receptor Antagonist                  |
| 12457 | mddr | n/a | AMPA Receptor Antagonist                  |
| 12462 | mddr | n/a | 3-Hydroxyanthranilate Oxygenase Inhibitor |
| 12463 | mddr | n/a | Kainic Acid Receptor Antagonist           |
| 12464 | mddr | n/a | Nitric Oxide Synthase Inhibitor           |
| 12471 | mddr | n/a | mGlu1 Antagonist                          |
| 16020 | mddr | n/a | Anticholinesterase                        |
| 16100 | mddr | n/a | Adrenergic (beta) Blocker                 |
| 16110 | mddr | n/a | Adrenergic (alpha2) Agonist               |
| 16200 | mddr | n/a | Carbonic Anhydrase Inhibitor              |
| 16250 | mddr | n/a | Prostaglandin                             |
| 17100 | mddr | n/a | Anticholinergic, Ophthalmic               |
| 17200 | mddr | n/a | Adrenergic, Ophthalmic                    |
| 27110 | mddr | n/a | Adrenergic (beta) Agonist                 |
| 27130 | mddr | n/a | Anticholinergic                           |
| 27222 | mddr | n/a | Leukotriene A4 Hydrolase Inhibitor        |
| 27223 | mddr | n/a | Adenosine A3 Antagonist                   |
| 27261 | mddr | n/a | PAF Antagonist                            |
| 27300 | mddr | n/a | Antihistaminic                            |
| 28210 | mddr | n/a | Adrenergic (beta1) Agonist                |
| 28310 | mddr | n/a | Phosphodiesterase Inhibitor               |
| 28330 | mddr | n/a | Adenylate Cyclase Activator               |
| 31250 | mddr | n/a | Adrenergic (beta) Blocker                 |
| 31251 | mddr | n/a | Adrenergic (beta1) Blocker                |
| 31260 | mddr | n/a | Adrenergic (alpha) Blocker                |
| 31261 | mddr | n/a | Adrenergic (alpha1) Blocker               |
| 31262 | mddr | n/a | Adrenergic (alpha2) Blocker               |
| 31281 | mddr | n/a | Dopamine beta-Hydroxylase Inhibitor       |
| 31340 | mddr | n/a | Vasopressin Antagonist                    |
| 31341 | mddr | n/a | Vasopressin V1 Antagonist                 |
| 31342 | mddr | n/a | Vasopressin V2 Antagonist                 |
| 31410 | mddr | n/a | ACE Inhibitor                             |
| 31420 | mddr | n/a | Renin Inhibitor                           |
| 31430 | mddr | n/a | Angiotensin II Blocker                    |
| 31432 | mddr | n/a | Angiotensin II AT1 Antagonist             |
| 31433 | mddr | n/a | Angiotensin II AT2 Antagonist             |
| 31650 | mddr | n/a | Endothelin Antagonist                     |

|       |      |     |                                        |
|-------|------|-----|----------------------------------------|
| 31651 | mddr | n/a | Endothelin Agonist                     |
| 31655 | mddr | n/a | Endothelin ETA Antagonist              |
| 31656 | mddr | n/a | Endothelin ETB Antagonist              |
| 34620 | mddr | n/a | Neutral Endopeptidase Inhibitor        |
| 37110 | mddr | n/a | Thrombin Inhibitor                     |
| 37121 | mddr | n/a | Factor Xa Inhibitor                    |
| 37125 | mddr | n/a | Factor VIIa Inhibitor                  |
| 37230 | mddr | n/a | Thromboxane Synthetase Inhibitor       |
| 37231 | mddr | n/a | Thromboxane Antagonist                 |
| 37240 | mddr | n/a | CAMP Phosphodiesterase Inhibitor       |
| 37252 | mddr | n/a | Prostaglandin                          |
| 37268 | mddr | n/a | P2T Purinoreceptor Antagonist          |
| 39100 | mddr | n/a | Glucocorticoid                         |
| 39500 | mddr | n/a | Antiglucocorticoid                     |
| 40100 | mddr | n/a | Androgen                               |
| 40120 | mddr | n/a | Antiandrogen                           |
| 40210 | mddr | n/a | Estrogen                               |
| 40231 | mddr | n/a | Progesterone Antagonist                |
| 41300 | mddr | n/a | Estrogen Receptor Modulator            |
| 42102 | mddr | n/a | Growth Hormone Release Promoting Agent |
| 42111 | mddr | n/a | Somatostatin Analog                    |
| 42112 | mddr | n/a | Somatostatin Antagonist                |
| 42510 | mddr | n/a | LHRH Agonist                           |
| 42520 | mddr | n/a | LHRH Antagonist                        |
| 42521 | mddr | n/a | Follicle-stimulating hormone           |
| 42650 | mddr | n/a | Melatonin Agonist                      |
| 42651 | mddr | n/a | Melatonin Antagonist                   |
| 42705 | mddr | n/a | CCK A Agonist                          |
| 42706 | mddr | n/a | CCK B Agonist                          |
| 42710 | mddr | n/a | CCK Agonist                            |
| 42711 | mddr | n/a | CCK Antagonist                         |
| 42712 | mddr | n/a | CCK A Antagonist                       |
| 42713 | mddr | n/a | CCK B Antagonist                       |
| 42731 | mddr | n/a | Substance P Antagonist                 |
| 42732 | mddr | n/a | Neurokinin Antagonist                  |
| 42733 | mddr | n/a | Neurokinin NK2 Antagonist              |
| 42735 | mddr | n/a | Neurokinin NK3 Antagonist              |

|       |      |     |
|-------|------|-----|
| 42737 | mddr | n/a |
| 42738 | mddr | n/a |
| 43131 | mddr | n/a |
| 43132 | mddr | n/a |
| 43135 | mddr | n/a |
| 43136 | mddr | n/a |
| 43210 | mddr | n/a |
| 44110 | mddr | n/a |
| 44210 | mddr | n/a |
| 45100 | mddr | n/a |
| 45200 | mddr | n/a |
| 45310 | mddr | n/a |
| 49932 | mddr | n/a |
| 50100 | mddr | n/a |
| 50160 | mddr | n/a |
| 52500 | mddr | n/a |
| 52502 | mddr | n/a |
| 52503 | mddr | n/a |
| 52505 | mddr | n/a |
| 52510 | mddr | n/a |
| 52530 | mddr | n/a |
| 52700 | mddr | n/a |
| 52701 | mddr | n/a |
| 54111 | mddr | n/a |
| 54112 | mddr | n/a |
| 54113 | mddr | n/a |
| 54114 | mddr | n/a |
| 54121 | mddr | n/a |
| 58202 | mddr | n/a |
| 59505 | mddr | n/a |
| 64100 | mddr | n/a |
| 64200 | mddr | n/a |
| 64203 | mddr | n/a |
| 64210 | mddr | n/a |
| 64220 | mddr | n/a |
| 64300 | mddr | n/a |
| 64400 | mddr | n/a |

Bombesin Antagonist  
Gastrin-Releasing Peptide Antagonist  
Glucosidase (alpha) Inhibitor  
Glucagon Receptor Antagonist  
Adrenoceptor (alpha2) Antagonist  
Adrenoceptor (beta3) Agonist  
Aldose Reductase Inhibitor  
Oxytocin  
Oxytocin Antagonist  
Thyroid Hormone  
Thyroid Inhibitor  
Parathyroid Hormone Antagonist  
Neuropeptide Y Antagonist  
Calcitonin Analog  
Cathepsin L Inhibitor  
HMG-CoA Reductase (beta) Inhibitor  
Squalene Synthetase Inhibitor  
Squalene Epoxidase Inhibitor  
2,3-Oxidosqualene-Lanosterol Cyclase Inhibitor  
Acetyl-CoA Thiolase Inhibitor  
ATP Citrate Lyase Inhibitor  
ACAT Inhibitor  
Cholesterol Esterase Inhibitor  
H2 Antagonist  
H+/K+-ATPase Inhibitor  
Antimuscarinic  
Prostaglandin  
Prostaglandin  
Muscarinic M3 Antagonist  
Retinoid  
Monocyclic beta-Lactam  
Cephalosporin  
Isocephem  
Oxacephem  
Carbacephem  
Penicillin  
Penem

|       |      |     |
|-------|------|-----|
| 64500 | mddr | n/a |
| 64530 | mddr | n/a |
| 64550 | mddr | n/a |
| 64600 | mddr | n/a |
| 71522 | mddr | n/a |
| 71523 | mddr | n/a |
| 71524 | mddr | n/a |
| 71527 | mddr | n/a |
| 75711 | mddr | n/a |
| 75721 | mddr | n/a |
| 75730 | mddr | n/a |
| 75755 | mddr | n/a |
| 78251 | mddr | n/a |
| 78323 | mddr | n/a |
| 78325 | mddr | n/a |
| 78326 | mddr | n/a |
| 78329 | mddr | n/a |
| 78330 | mddr | n/a |
| 78331 | mddr | n/a |
| 78335 | mddr | n/a |
| 78336 | mddr | n/a |
| 78337 | mddr | n/a |
| 78341 | mddr | n/a |
| 78342 | mddr | n/a |
| 78348 | mddr | n/a |
| 78351 | mddr | n/a |
| 78352 | mddr | n/a |
| 78353 | mddr | n/a |
| 78362 | mddr | n/a |
| 78363 | mddr | n/a |
| 78366 | mddr | n/a |
| 78370 | mddr | n/a |
| 78371 | mddr | n/a |
| 78373 | mddr | n/a |
| 78374 | mddr | n/a |
| 78375 | mddr | n/a |
| 78376 | mddr | n/a |

|                                               |
|-----------------------------------------------|
| Carbapenem                                    |
| Tribactam                                     |
| Lactam (beta) Antibiotic                      |
| Lactamase (beta) Inhibitor                    |
| Reverse Transcriptase Inhibitor               |
| HIV-1 Protease Inhibitor                      |
| TAT Inhibitor                                 |
| HIV Integrase Inhibitor                       |
| Antiestrogen                                  |
| Aromatase Inhibitor                           |
| Estrone Sulfatase Inhibitor                   |
| Vitamin D Analog                              |
| Guanylate Cyclase Activator                   |
| Elastase Inhibitor                            |
| S-Adenosyl-L-Homocysteine Hydrolase Inhibitor |
| Chymotrypsin Inhibitor                        |
| Dipeptidyl Aminopeptidase IV Inhibitor        |
| Protease Inhibitor                            |
| Cyclooxygenase Inhibitor                      |
| Steroid (5alpha) Reductase Inhibitor          |
| Glucosidase (alpha) Inhibitor                 |
| Protocollagen Prolyl Hydroxylase Inhibitor    |
| Purine Nucleoside Phosphorylase Inhibitor     |
| Glucuronidase (beta) Inhibitor                |
| Phospholipase A2 Inhibitor                    |
| Lipoxygenase Inhibitor                        |
| Uridine Phosphorylase Inhibitor               |
| Adenosine Deaminase Inhibitor                 |
| Thymidylate Synthetase Inhibitor              |
| Trypsin Inhibitor                             |
| Ribonucleotide Reductase Inhibitor            |
| Tyrosine-Specific Protein Kinase Inhibitor    |
| Collagenase Inhibitor                         |
| Topoisomerase Inhibitor                       |
| Protein Kinase C Inhibitor                    |
| Thiol Protease Inhibitor                      |
| Mannosidase Inhibitor                         |

|       |      |     |
|-------|------|-----|
| 78378 | mddr | n/a |
| 78385 | mddr | n/a |
| 78387 | mddr | n/a |
| 78389 | mddr | n/a |
| 78390 | mddr | n/a |
| 78391 | mddr | n/a |
| 78393 | mddr | n/a |
| 78394 | mddr | n/a |
| 78396 | mddr | n/a |
| 78398 | mddr | n/a |
| 78401 | mddr | n/a |
| 78403 | mddr | n/a |
| 78406 | mddr | n/a |
| 78407 | mddr | n/a |
| 78409 | mddr | n/a |
| 78411 | mddr | n/a |
| 78413 | mddr | n/a |
| 78415 | mddr | n/a |
| 78416 | mddr | n/a |
| 78420 | mddr | n/a |
| 78424 | mddr | n/a |
| 78427 | mddr | n/a |
| 78429 | mddr | n/a |
| 78432 | mddr | n/a |
| 78437 | mddr | n/a |
| 78439 | mddr | n/a |
| 78440 | mddr | n/a |
| 78444 | mddr | n/a |
| 78445 | mddr | n/a |
| 78446 | mddr | n/a |
| 78451 | mddr | n/a |
| 78453 | mddr | n/a |
| 78454 | mddr | n/a |
| 78460 | mddr | n/a |

Ornithine Decarboxylase Inhibitor  
Adenosine Kinase Inhibitor  
Dihydroorotase Inhibitor  
Dihydrofolate Reductase Inhibitor  
Folypolyglutamate Synthetase Inhibitor  
Thymidine Kinase Inhibitor  
COMT Inhibitor  
Poly(ADP-ribose)synthetase Inhibitor  
Dehydropeptidase-I Inhibitor  
Proteoglycanase Inhibitor  
Phosphatidylinositol Kinase Inhibitor  
Glycinamide Ribonucleotide Formyltransferase Inhibitor  
Transglutaminase (Factor XIIIa) Inhibitor  
S-Adenosyl-L-methionine Decarboxylase Inhibitor  
Phospholipase C Inhibitor  
O6-Alkylguanine-DNA Alkyltransferase Inhibitor  
Cathepsin B Inhibitor  
Phosphodiesterase I Inhibitor  
Phosphodiesterase II Inhibitor  
Glutathione S-Transferase Inhibitor  
Inosine Monophosphate Dehydrogenase Inhibitor  
17alpha-Hydroxylase/C17-20 Lyase Inhibitor  
Farnesyl Protein Transferase Inhibitor  
Matrix Metalloproteinase Inhibitor  
Phosphodiesterase V Inhibitor  
Calpain Inhibitor  
Prolyl-Peptidyl Isomerase Inhibitor  
Tryptase Inhibitor  
Glucose-6-phosphate Translocase Inhibitor  
Cytochrome P450 Oxidase Inhibitor  
Steroid (5alpha) Reductase 1 Inhibitor  
Cyclooxygenase-1 Inhibitor  
Cyclooxygenase-2 Inhibitor  
Geranylgeranyl Protein Transferase Inhibitor
